# Supplementary material for: Subtype-Specific Causal Effects of Antidiabetic Drug Targets on Ovarian Cancer: Mendelian Randomization and Colocalization Evidence
Source: Research Square preprint supplement (doi:10.21203/rs.3.rs-7173550/v1), 2025-07-25
Supplement: Supplementary file 1 [file d1a2ea939038335b7dae3da7.xlsx]

## Sheet: Table S1
Table 1. Drug targets of all antidiabetic drugs from the DrugBabank.
Drug Class	ATC code	Medication Subclass	ATC Code	Drug name	ATC Code	Target Gene(s)
INSULINS AND ANALOGUES	A10A	Insulins and analogues for injection, fast-acting	A10AB	insulin (human)	A10AB01	INSR,IGF1R,CPE,CCN3,LRP2,IGFBP7
				insulin (beef)	A10AB02	INSR,IGF1R
				insulin (pork)	A10AB03	INSR,IGF1R
				insulin lispro	A10AB04	INSR,IGF1R
				insulin aspart	A10AB05	INSR,IGF1R
				insulin glulisine	A10AB06	INSR,IGF1R
				combinations	A10AB30	NA
		Insulins and analogues for injection, intermediate-acting	A10AC	insulin (human)	A10AC01	INSR,IGF1R,CPE,CCN3,LRP2,IGFBP7
				insulin (beef)	A10AC02	INSR,IGF1R
				insulin (pork)	A10AC03	INSR,IGF1R
				insulin lispro	A10AC04	INSR,IGF1R
				combinations	A10AC30	NA
		Insulins and analogues for injection, intermediate- or long- acting combined with fast-acting	A10AD	insulin (human)	A10AD01	INSR,IGF1R,CPE,CCN3,LRP2,IGFBP7
				insulin (beef)	A10AD02	INSR,IGF1R
				insulin (pork)	A10AD03	INSR,IGF1R
				insulin lispro	A10AD04	INSR,IGF1R
				insulin aspart	A10AD05	INSR,IGF1R
				insulin degludec and insulin aspart	A10AD06	INS,INSR,IGF1R
				combinations	A10AD30	NA
		Insulins and analogues for injection, long-acting	A10AE	insulin (human)	A10AE01	INSR,IGF1R,CPE,CCN3,LRP2,IGFBP7
				insulin (beef)	A10AE02	INSR,IGF1R
				insulin (pork)	A10AE03	INSR,IGF1R
				insulin glargine	A10AE04	INSR,IGF1R
				insulin detemir	A10AE05	INSR,IGF1R
				insulin degludec	A10AE06	INS,INSR,IGF1R
				combinations	A10AB30	NA
				insulin glargine and lixisenatide	A10AE54	INSR,IGF1R,GLP1R
				insulin degludec and liraglutide	A10AE56	INS,INSR,IGF1R,GLP1R
				Insulin icodec	A10AE07	INSR,IGF1R
		Insulins and analogues for inhalation	A10AF	insulin (human)	A10AF01	INSR,IGF1R,CPE,CCN3,LRP2,IGFBP7
BLOOD GLUCOSE LOWERING DRUGS, EXCL. INSULINS	A10B	Biguanides	A10BA	phenformin	A10BA01	PRKAA1,PRKAG1,PRKAB1,KCNJ8
				metformin	A10BA02	SLC47A1,ACACB,ETFDH,PRKAB1,GPD1
				buformin	A10BA03	NA
		Sulfonylureas	A10BB	glibenclamide	A10BB01	ABCC8,KCNJ11,ABCC9,ABCB11,ABCA1,KCNJ8,CPT1A,CFTR,TRPM4
				chlorpropamide	A10BB02	ABCC8,KCNJ10
				tolbutamide	A10BB03	ABCC9,ABCC8,KCNJ1
				glibornuride	A10BB04	NA
				tolazamide	A10BB05	ABCC8,KCNJ11,KCNJ10
				carbutamide	A10BB06	NA
				glipizide	A10BB07	ABCC8,KCNJ10,PPARG
				gliquidone	A10BB08	ABCC8,KCNJ10,KCNJ8
				gliclazide	A10BB09	ABCC8,VEGFA
				metahexamide	A10BB10	NA
				glisoxepide	A10BB11	KCNJ10,KCNJ8,INS
				glimepiride	A10BB12	ABCC9,KCNJ11,KCNJ1,ABCC8
				acetohexamide	A10BB31	KCNJ1,ABCC8
		Sulfonamides (heterocyclic)	A10BC	glymidine	A10BC01	KCNJ1,KCNJ10,ABCC8
		Combinations of oral blood glucose lowering drugs	A10BD	REPITITION		REPITITION
		Alpha glucosidase inhibitors	A10BF	acarbose	A10BF01	MGAM,SI,AMY2A,GAA
				miglitol	A10BF02	GAA,GANAB,GANC,MGAM
				voglibose	A10BF03	MGAM
		Thiazolidinediones	A10BG	troglitazone	A10BG01	PPARG,ESRRG,ESRRA,PPARD,PPARA,GSTP1,ACSL4,SERPINE1,SLC29A1
				rosiglitazone	A10BG02	PPARG,ACSL4,PPARA,PPARD,RXRA,RXRB,RXRG
				pioglitazone	A10BG03	PPARG,MAOB
				lobeglitazone	A10BG04	PPARA,PPARG
		Dipeptidyl peptidase 4 (DPP-4) inhibitors	A10BH	sitagliptin	A10BH01	DPP4
				vildagliptin	A10BH02	DPP4
				saxagliptin	A10BH03	DPP4
				alogliptin	A10BH04	DPP4
				linagliptin	A10BH05	DPP4
				gemigliptin	A10BH06	DPP4
				evogliptin	A10BH07	DPP4
				teneligliptin	A10BH08	DPP4
				sitagliptin and simvastatin	A10BH51	DPP4,HMGCR,ITGAL,HDAC2
				gemigliptin and rosuvastatin	A10BH52	DPP4,HMGCR,ITGAL
		Glucagon-like peptide-1 (GLP-1) analogues	A10BJ	exenatide	A10BJ01	GLP1R
				liraglutide	A10BJ02	GLP1R
				lixisenatide	A10BJ03	GLP1R
				albiglutide	A10BJ04	GLP1R
				dulaglutide	A10BJ05	GLP1R
				semaglutide	A10BJ06	GLP1R
				beinaglutide	A10BJ07	NA
		Sodium-glucose co-transporter 2 (SGLT2) inhibitors	A10BK	dapagliflozin	A10BK01	SLC5A2
				canagliflozin	A10BK02	SLC5A2
				empagliflozin	A10BK03	SLC5A2
				ertugliflozin	A10BK04	SLC5A2
				ipragliflozin	A10BK05	SLC5A2
				sotagliflozin	A10BK06	SLC5A2,SLC5A1
				luseogliflozin	A10BK07	NA
				bexagliflozin	A10BK08	SLC5A2
		Other blood glucose lowering drugs, excl. insulins	A10BX	guar gum	A10BX01	NA
				repaglinide	A10BX02	ABCC9,ABCC8,HRH1,PPARG
				nateglinide	A10BX03	ABCC8,PPARG,
				pramlintide	A10BX05	GLP1R,CALCR,RAMP1,RAMP2,RAMP3
				benfluorex	A10BX06	NA
				mitiglinide	A10BX08	ABCC8,KCNJ10,PPARG
				imeglimin	A10BX15	PRKAA1,PRKAB1,PRKAG1
				tirzepatide	A10BX16	GLP1R
				carfloglitazar	A10BX17	NA
				dorzagliatin	A10BX18	GCK
OTHER DRUGS USED IN DIABETES	A10X	Aldose reductase inhibitors	A10XA	Tolrestat	A10XA01	SIGMAR1,AKR1B1,AKR1A1, AKR1B10
		Other drugs used in diabetes	A10XX	Teplizumab	A10XX01	CD3E
Table 1 provides a detailed categorization of antidiabetic drugs from the DrugBank database. The table is organized into different drug classes and subclasses, with corresponding Anatomical Therapeutic Chemical (ATC) codes, drug names, and target genes associated with each medication.

## Sheet: Table S2
Table 2. Information and action of drug target genes.
Drug	Target Gene	Action	chr	GRCh37_start	GRCh37_end
Sulfonylureas	ABCC8	Modulator	11	17414045	17498392
	KCNJ11	Blocker	11	17406795	17410893
	ABCC9	Modulator	12	21950323	22094360
	ABCB11	Inhibitor	2	169777291	169887834
	ABCA1	Inhibitor	9	107543287	107690436
	KCNJ8	Inhibitor	12	21917889	21927640
	CPT1A	Inhibitor	11	68522088	68609384
	CFTR	Antagonist	7	117120079	117308719
	TRPM4	Inhibitor	19	49661049	49715093
	KCNJ10	Blocker	1	160007257	160039950
	PPARG	Agonist;Regulator	3	12328867	12475843
	VEGFA	Other/unknown	6	43737946	43754224
	INS	Regulator	11	2181009	2182439
	KCNJ1	Inhibitor	11	128707915	128737191
Thiazolidinediones	PPARG	Agonist;Regulator	3	12328867	12475843
	ESRRG	Inverse agonist	1	216676588	217311044
	ESRRA	Inverse agonist	11	64072996	64084215
	PPARD	Unknown	6	35310335	35395955
	PPARA	Unknown	22	46546429	46639653
	GSTP1	Unknown	11	67351283	67354124
	ACSL4	Inhibitor	X	108884564	108976486
	SERPINE1	Antagonist	7	100770385	100782528
	SLC29A1	Inhibitor	6	44187352	44201879
	RXRA	Unknown	9	137218301	137332431
	RXRB	Unknown	6	33161365	33168630
	RXRG	Unknown	1	165370159	165414363
	MAOB	Inhibitor	X	43625857	43741696
Insulin	INSR	Agonist	19	7112276	7294425
	IGF1R	Activator	15	99191768	99507759
	CPE	Modulator;Product of	4	166300160	166419699
	CCN3	Downregulator	8	120428686	120436674
	LRP2	Substrate	2	169983619	170219044
	IGFBP7	Inhibitor;Binder	4	57896939	57976551
Biguanides	PRKAA1	Activator	5	40759491	40798476
	PRKAG1	Activator	12	49396057	49412559
	PRKAB1	Activator	12	120105938	120119424
	SLC47A1	Modulator	17	19437167	19482347
	ACACB	Activator	12	109548994	109706031
	ETFDH	Inhibitor	4	159593448	159630775
	GPD1	Inhibitor	12	50497791	50505096
AGI	MGAM	Inhibitor	7	141695679	141806547
	SI	Inhibitor	3	164696686	164796284
	AMY2A	Inhibitor	1	104160049	104168402
	GAA	Inhibitor	17	78075380	78093680
	GANAB	Antagonist	11	62392301	62414085
	GANC	Antagonist	15	42565399	42645864
DPP4i	DPP4	Inhibitor	2	162848755	162930725
	HMGCR	Inhibitor	5	74632993	74657941
	ITGAL	Inhibitory allosteric modulator	16	30484063	30534506
	HDAC2	Inhibitor	6	114254192	114292312
GLP-1RA	GLP1R	Agonist	6	39016557	39059079
SGLT2i	SLC5A2	Inhibitor	16	31494444	31502090
	SLC5A1	Inhibitor	22	32439248	32509016
Other drugs	HRH1	Agonist	3	11178924	11305243
	CALCR	Agonist	7	93053798	93204036
	RAMP1	Agonist	2	238768266	238820748
	RAMP2	Agonist	17	40913245	40915059
	RAMP3	Agonist	7	45197390	45223849
	GCK	Activator	7	44182812	44229038
	SIGMAR1	Binder	9	34634719	34637784
	AKR1B1	Inhibitor	7	134127102	134143991
	AKR1A1	Unknown	1	46016498	46035721
	AKR1B10	Unknown	7	134212319	134226164
	CD3E	Antibody	11	118175445	118186888
Table 2 outlines information on drug target genes associated with various classes of antidiabetic drugs, particularly focusing on their genomic location and action. Each entry includes the drug class, specific target gene, the action of the drug on that gene (such as inhibitor, modulator, antagonist, etc.), and the chromosomal location of the gene, provided by chromosome number (chr) and the star…

## Sheet: Table S3
Details of all data sources
	Characteristic	Resource/Author	Sample Size	Population	PubMed ID	IEU GWAS ID	Data Source	Statistical analysis
Two-sample MR SMR colocalization	9 ovarian cancer (OC) phenotypes	Ovarian Cancer Association Consortium (OCAC)	66450	European	28346442	ieu-a-1120, ieu-a-1121, ieu-a-1122, ieu-a-1124, ieu-a-1231, ieu-a-1125, ieu-a-1236, ieu-a-1234, ieu-a-1237	https://gwas.mrcieu.ac.uk/datasets/ieu-a-1120/	Outcomes in all analysis
Two-sample MR	HbA1c	UK Biobank	389889	European	34017140	ebi-a-GCST90014006	https://gwas.mrcieu.ac.uk/datasets/ebi-a-GCST90014006/	Select IVs in principal analysis
	HbA1c	Within family GWAS consortium	45734	European	35534559	ieu-b-4842	https://gwas.mrcieu.ac.uk/datasets/ieu-b-4842/	Select IVs in replication analysis
	HbA1c	MAGIC	46368	European	20858683	ieu-b-103	https://gwas.mrcieu.ac.uk/datasets/ieu-b-103/	Select IVs in replication analysis
	Type 2 diabetes	DIAGRAM	110452	Mixed	24509480	ieu-a-23	https://gwas.mrcieu.ac.uk/datasets/ieu-a-23/	Select IVs in replication analysis
	Type 2 diabetes	FinnGen	212351	European	NA	finn-b-E4_DM2_STRICT	https://gwas.mrcieu.ac.uk/datasets/finn-b-E4_DM2_STRICT/	Select IVs in replication analysis
	Type 2 diabetes	Sílvia Bonàs-Guarch	70127	European	29358691	ebi-a-GCST005413	https://gwas.mrcieu.ac.uk/datasets/ebi-a-GCST005413/	Select IVs in replication analysis
	Fasting glucose	MAGIC	133010	European	22885924	ieu-b-114	https://gwas.mrcieu.ac.uk/datasets/ieu-b-114/	Select IVs in replication analysis
	Glucose	UK Biobank	114867	European	NA	met-d-Glucose	https://gwas.mrcieu.ac.uk/datasets/met-d-Glucose/	Positive control in MR
	Glucose	UK Biobank	357580	European	34017140	ebi-a-GCST90014005	https://gwas.mrcieu.ac.uk/datasets/ebi-a-GCST90014005/	Positive control in MR, scale the effects from HbA1c to glucose
	Type 2 diabetes	DIAGRAM, GERA, and UKB	655666	European	30054458	ebi-a-GCST006867	https://gwas.mrcieu.ac.uk/datasets/ebi-a-GCST006867/	Positive control in MR
	Type 2 diabetes	FinnGen	212351	European	NA	finn-b-E4_DM2_STRICT	https://gwas.mrcieu.ac.uk/datasets/finn-b-E4_DM2_STRICT/	Positive control in MR
	Body mass index	UK Biobank	407609	European	34017140	ebi-a-GCST90013974	https://gwas.mrcieu.ac.uk/datasets/ebi-a-GCST90013974/	Covariates in MVMR analysis
	Systolic blood pressure	UK Biobank	469767	European	29892013	ebi-a-GCST90029011	https://gwas.mrcieu.ac.uk/datasets/ebi-a-GCST90029011/	Covariates in MVMR analysis
	Smoking status	UK Biobank	468170	European	29892013	ebi-a-GCST90029014	https://gwas.mrcieu.ac.uk/datasets/ebi-a-GCST90029014/	Covariates in MVMR analysis
	Alcohol drinker status	UK Biobank	360726	European	NA	ukb-d-20117_2	https://gwas.mrcieu.ac.uk/datasets/ukb-d-20117_2/	Covariates in MVMR analysis
SMR or colocalization	eQTLs	eQTLGen	31684	Predominantly European	34475573	eqtl-a	https://www.eqtlgen.org/	SMR analysis and coloclization analysis
	eQTLs	GTEx(V8)-Ovary	167	Predominantly European American	32913098	NA	https://yanglab.westlake.edu.cn/software/smr/#eQTLsummarydata	SMR replication analysis
	eQTLs	PsychENCODE	1387	Mixed	30545857	NA	https://yanglab.westlake.edu.cn/software/smr/#eQTLsummarydata	SMR replication analysis
This table provides detailed information about various data sources used in the study. The table includes several characteristics such as specific phenotypes and genetic data, indicating the resource or author, sample size, population background, and associated PubMed and IEU GWAS IDs.

## Sheet: Table S4
The single nucleotide polymorphisms (SNPs) and corresponding effects on HbA1c that used for each drug target.
Target Gene	Drug	SNP	chr	effect_allele.exposure	other_allele.exposure	pos.exposure	se.exposure	pval.exposure	beta.exposure	eaf.exposure	R2	F	palindromic	mr_keep	Phenotype
ABCC8/KCNJ11	Sulfonylureas	rs2214286	11	C	T	17376064	0.00228339	4.9e-08	-0.0124557	0.270378	7.63e-05	29.756	FALSE	TRUE	HbA1c
ABCC8/KCNJ11	Sulfonylureas	rs61880293	11	C	T	17376498	0.00378893	4.35e-08	0.020748	0.0735586	7.69e-05	29.9859	FALSE	TRUE	HbA1c
ABCC8/KCNJ11	Sulfonylureas	rs757110	11	A	C	17418477	0.0021001	1.57e-25	-0.0219322	0.648111	0.000279655	109.064	FALSE	TRUE	HbA1c
ABCB11	Sulfonylureas	rs115756535	2	T	C	169406646	0.00548884	2.22e-14	-0.0419207	0.028827	0.000149586	58.3302	FALSE	TRUE	HbA1c
ABCB11	Sulfonylureas	rs183034862	2	T	C	169313518	0.00669461	6.51e-17	0.0559369	0.0178926	0.000179031	69.8142	FALSE	TRUE	HbA1c
ABCB11	Sulfonylureas	rs79467716	2	A	G	169404334	0.00828227	3.23e-11	-0.0549572	0.0139165	0.000112917	44.03	FALSE	TRUE	HbA1c
ABCB11	Sulfonylureas	rs2601091	2	G	A	169295677	0.00393132	4.14e-10	0.0245656	0.923459	0.000100137	39.0459	FALSE	TRUE	HbA1c
ABCB11	Sulfonylureas	rs114496060	2	C	A	169448907	0.00689773	1.38e-10	-0.0442693	0.0149105	0.000105635	41.1899	FALSE	TRUE	HbA1c
CPT1A	Sulfonylureas	rs188584129	11	A	G	68980762	0.00784069	3.89e-08	-0.043092	0.0168986	7.75e-05	30.2053	FALSE	TRUE	HbA1c
CPT1A	Sulfonylureas	rs61167756	11	T	C	68950835	0.00349637	1.76e-09	-0.0210445	0.0864811	9.29e-05	36.2277	FALSE	TRUE	HbA1c
INS	Sulfonylureas	rs11042596	11	G	T	2118860	0.00215961	2.7e-10	0.0136386	0.619284	0.000102283	39.8829	FALSE	TRUE	HbA1c
INS	Sulfonylureas	rs11564713	11	T	C	2191709	0.00210733	8.62e-11	-0.0136752	0.404573	0.000107998	42.1114	FALSE	TRUE	HbA1c
INS	Sulfonylureas	rs11564725	11	T	C	2177369	0.00238873	7.6e-26	0.0251106	0.220676	0.000283345	110.504	FALSE	TRUE	HbA1c
INS	Sulfonylureas	rs3213223	11	A	G	2156930	0.00239208	2.26e-15	0.0189599	0.206759	0.000161105	62.823	FALSE	TRUE	HbA1c
KCNJ1	Sulfonylureas	rs8705	11	A	G	128328913	0.00219013	3.76e-11	-0.0144835	0.324056	0.000112155	43.7326	FALSE	TRUE	HbA1c
ABCB11/LRP2	Sulfonylureas/Insulin	rs115941163	2	T	C	169811749	0.0090243	3.65e-21	0.0852107	0.0168986	0.000228624	89.1577	FALSE	TRUE	HbA1c
ABCB11/LRP2	Sulfonylureas/Insulin	rs116076574	2	A	G	169548984	0.00676693	1.4e-12	-0.0479391	0.0139165	0.000128706	50.1873	FALSE	TRUE	HbA1c
ABCB11/LRP2	Sulfonylureas/Insulin	rs147001976	2	A	G	169639844	0.00565835	5.69e-12	-0.0389696	0.0357853	0.000121641	47.4318	FALSE	TRUE	HbA1c
ABCB11/LRP2	Sulfonylureas/Insulin	rs148766104	2	A	G	169912240	0.00751169	2.16e-10	-0.0476932	0.0129225	0.000103384	40.3121	FALSE	TRUE	HbA1c
ABCB11/LRP2	Sulfonylureas/Insulin	rs16855893	2	C	T	169652647	0.00463246	4.94e-16	0.0375833	0.0516899	0.000168792	65.821	FALSE	TRUE	HbA1c
ABCB11/LRP2	Sulfonylureas/Insulin	rs17251018	2	G	A	169588195	0.00219252	5.3e-11	-0.0143881	0.496024	0.000110441	43.0643	FALSE	TRUE	HbA1c
ABCB11/LRP2	Sulfonylureas/Insulin	rs17251700	2	A	G	169613639	0.00653919	8.18e-14	-0.0488312	0.027833	0.000143003	55.7628	FALSE	TRUE	HbA1c
ABCB11/LRP2	Sulfonylureas/Insulin	rs3843328	2	A	G	169656995	0.0022432	1.02e-25	-0.0235175	0.686879	0.000281827	109.912	FALSE	TRUE	HbA1c
ABCB11/LRP2	Sulfonylureas/Insulin	rs62174445	2	G	T	169588284	0.00319681	2.14e-24	-0.0325843	0.104374	0.000266395	103.892	FALSE	TRUE	HbA1c
ABCB11/LRP2	Sulfonylureas/Insulin	rs76031050	2	A	G	169816670	0.0050285	3.6e-10	-0.0315318	0.0337972	0.000100841	39.3204	FALSE	TRUE	HbA1c
ABCB11/LRP2	Sulfonylureas/Insulin	rs77609521	2	A	G	169591521	0.00390322	9.72e-43	-0.0534865	0.054672	0.000481385	187.776	FALSE	TRUE	HbA1c
PPARG	Sulfonylureas/TZDs	rs112358666	3	T	C	12724773	0.00363251	5.4e-10	-0.022547	0.0775348	9.88e-05	38.5267	FALSE	TRUE	HbA1c
PPARG	Sulfonylureas/TZDs	rs112496224	3	T	C	12301915	0.00523311	2.29e-16	-0.0429422	0.0437376	0.000172676	67.3359	FALSE	TRUE	HbA1c
PPARG	Sulfonylureas/TZDs	rs113303080	3	A	G	12464984	0.00562249	2.8e-13	-0.0410654	0.0308151	0.000136803	53.3449	FALSE	TRUE	HbA1c
PPARG	Sulfonylureas/TZDs	rs1152002	3	T	C	12471871	0.00205643	9.62e-13	-0.0146744	0.49006	0.000130586	50.9203	FALSE	TRUE	HbA1c
PPARG	Sulfonylureas/TZDs	rs115633989	3	G	A	12176274	0.00458093	4.24e-13	-0.033201	0.0427435	0.000134709	52.5282	FALSE	TRUE	HbA1c
PPARG	Sulfonylureas/TZDs	rs17029006	3	T	C	12329452	0.00228102	1.75e-09	0.0137304	0.277336	9.29e-05	36.2331	FALSE	TRUE	HbA1c
PPARG	Sulfonylureas/TZDs	rs17669026	3	G	A	12042835	0.00267922	1.19e-08	-0.0152739	0.183897	8.34e-05	32.4998	FALSE	TRUE	HbA1c
PPARG	Sulfonylureas/TZDs	rs17669062	3	C	T	12043966	0.00375695	3.61e-12	-0.0261171	0.0795229	0.000123932	48.3256	FALSE	TRUE	HbA1c
PPARG	Sulfonylureas/TZDs	rs17671592	3	C	T	12273414	0.00479321	3.19e-08	-0.0265086	0.0576541	7.84e-05	30.5857	FALSE	TRUE	HbA1c
PPARG	Sulfonylureas/TZDs	rs2305398	3	G	A	12856856	0.00207401	1.28e-13	-0.0153642	0.65507	0.000140733	54.8777	FALSE	TRUE	HbA1c
PPARG	Sulfonylureas/TZDs	rs2454429	3	A	G	12620720	0.00203931	2.44e-15	-0.0161446	0.588469	0.000160723	62.6738	FALSE	TRUE	HbA1c
PPARG	Sulfonylureas/TZDs	rs2920499	3	G	A	12319058	0.00202734	1.12e-17	0.0173555	0.468191	0.000187931	73.2856	FALSE	TRUE	HbA1c
PPARG	Sulfonylureas/TZDs	rs307586	3	T	C	12110247	0.00316571	9.11e-20	-0.0288051	0.900596	0.000212307	82.7931	FALSE	TRUE	HbA1c
PPARG	Sulfonylureas/TZDs	rs310750	3	G	T	12273674	0.00332725	2.69e-19	-0.0298808	0.916501	0.000206815	80.6513	FALSE	TRUE	HbA1c
PPARG	Sulfonylureas/TZDs	rs4518111	3	C	A	12377344	0.00204318	4.27e-65	-0.0348122	0.585487	0.000744021	290.3	FALSE	TRUE	HbA1c
PPARG	Sulfonylureas/TZDs	rs66603943	3	C	T	12484681	0.00252451	1.75e-13	-0.0185979	0.233598	0.000139179	54.2714	FALSE	TRUE	HbA1c
PPARG	Sulfonylureas/TZDs	rs6763925	3	C	T	12515602	0.00221904	4.31e-22	-0.0214435	0.287276	0.000239451	93.3811	FALSE	TRUE	HbA1c
PPARG	Sulfonylureas/TZDs	rs6770851	3	T	C	12797563	0.00288442	1.02e-14	-0.0223173	0.143141	0.000153518	59.8638	FALSE	TRUE	HbA1c
PPARG	Sulfonylureas/TZDs	rs709159	3	A	C	12481203	0.00236746	9.47e-16	-0.0190191	0.749503	0.000165501	64.5375	FALSE	TRUE	HbA1c
PPARG	Sulfonylureas/TZDs	rs73130305	3	T	C	12621075	0.0024389	1.45e-25	-0.0254889	0.217694	0.00028006	109.222	FALSE	TRUE	HbA1c
PPARG	Sulfonylureas/TZDs	rs75262919	3	T	C	12419366	0.00360626	1.98e-11	-0.0241896	0.0805169	0.000115386	44.9926	FALSE	TRUE	HbA1c
PPARG	Sulfonylureas/TZDs	rs75926229	3	C	A	12711971	0.00214451	7.52e-12	-0.0146843	0.525845	0.000120242	46.8865	FALSE	TRUE	HbA1c
PPARG	Sulfonylureas/TZDs	rs7641345	3	G	A	12296540	0.00306141	2.11e-09	-0.0183361	0.866799	9.2e-05	35.8731	FALSE	TRUE	HbA1c
PPARG	Sulfonylureas/TZDs	rs77747822	3	A	G	12513531	0.00378582	3.3e-10	-0.0237895	0.0745527	0.000101266	39.4865	FALSE	TRUE	HbA1c
PPARG	Sulfonylureas/TZDs	rs78512510	3	A	G	12226789	0.00537154	4.92e-10	-0.0334192	0.0308151	9.93e-05	38.7072	FALSE	TRUE	HbA1c
PPARG	Sulfonylureas/TZDs	rs80266055	3	A	G	12742026	0.00338437	7.72e-14	-0.0252985	0.0984095	0.000143295	55.8768	FALSE	TRUE	HbA1c
PPARG	Sulfonylureas/TZDs	rs895096	3	A	C	12437675	0.00229381	9.16e-11	0.0148642	0.271372	0.000107691	41.9919	FALSE	TRUE	HbA1c
PPARG	Sulfonylureas/TZDs	rs9872031	3	A	G	12496461	0.00203975	1.19e-31	0.0238776	0.404573	0.000351345	137.033	FALSE	TRUE	HbA1c
PPARG	Sulfonylureas/TZDs	rs9874315	3	A	C	12727962	0.00203688	4.45e-14	0.0153726	0.405567	0.000146069	56.9589	FALSE	TRUE	HbA1c
VEGFA/SLC29A1	Sulfonylureas/TZDs	rs10434	6	G	A	43753212	0.00204588	2.86e-08	0.011354	0.539761	7.9e-05	30.7989	FALSE	TRUE	HbA1c
VEGFA/SLC29A1	Sulfonylureas/TZDs	rs1570360	6	G	A	43737830	0.0021435	8.23e-17	0.0178508	0.677932	0.000177848	69.3531	FALSE	TRUE	HbA1c
VEGFA/SLC29A1	Sulfonylureas/TZDs	rs2894536	6	T	C	43801878	0.0027852	3.63e-09	-0.0164327	0.822068	8.93e-05	34.8099	FALSE	TRUE	HbA1c
VEGFA/SLC29A1	Sulfonylureas/TZDs	rs9394963	6	T	G	43719391	0.00211195	1.65e-08	-0.0119218	0.355865	8.17e-05	31.865	FALSE	TRUE	HbA1c
VEGFA/SLC29A1	Sulfonylureas/TZDs	rs9472125	6	T	C	43756169	0.00332827	4.26e-19	-0.0297214	0.130219	0.00020449	79.7442	FALSE	TRUE	HbA1c
VEGFA/SLC29A1	Sulfonylureas/TZDs	rs998584	6	A	C	43757896	0.00201857	2e-27	0.021901	0.503976	0.000301834	117.717	FALSE	TRUE	HbA1c
ESRRA	TZDs	rs35864060	11	T	C	64112050	0.00565615	1.92e-09	0.0339604	0.0427435	9.25e-05	36.0497	FALSE	TRUE	HbA1c
RXRB	TZDs	rs1015166	6	T	C	32798731	0.00212892	1.29e-17	0.0181904	0.317097	0.000187216	73.0068	FALSE	TRUE	HbA1c
RXRB	TZDs	rs1055559	6	T	C	32832786	0.00341671	3.93e-13	0.0247988	0.928429	0.000135097	52.6796	FALSE	TRUE	HbA1c
RXRB	TZDs	rs139345337	6	C	T	32790641	0.00566982	9.72e-12	-0.0386145	0.026839	0.000118951	46.3831	FALSE	TRUE	HbA1c
RXRB	TZDs	rs154979	6	A	C	32890939	0.00588715	1.59e-10	-0.0376592	0.028827	0.000104941	40.9194	FALSE	TRUE	HbA1c
RXRB	TZDs	rs17206350	6	C	T	32675067	0.0020154	6.64e-10	-0.0124438	0.497018	9.78e-05	38.1225	FALSE	TRUE	HbA1c
RXRB	TZDs	rs17427599	6	T	C	32667364	0.00233004	5.94e-11	-0.0152507	0.277336	0.000109866	42.8401	FALSE	TRUE	HbA1c
RXRB	TZDs	rs200185390	6	C	A	32726605	0.00340273	9.07e-26	0.035713	0.0874751	0.000282445	110.153	FALSE	TRUE	HbA1c
RXRB	TZDs	rs2294478	6	A	C	33098966	0.00201847	6.18e-09	-0.011731	0.479125	8.66e-05	33.7772	FALSE	TRUE	HbA1c
RXRB	TZDs	rs241424	6	A	G	32804934	0.00202771	5.87e-30	0.023056	0.459245	0.000331491	129.287	FALSE	TRUE	HbA1c
RXRB	TZDs	rs2621417	6	A	G	32853607	0.00205028	3.19e-24	0.0208181	0.582505	0.000264363	103.099	FALSE	TRUE	HbA1c
RXRB	TZDs	rs3104407	6	A	G	32682452	0.00207638	3.32e-12	0.0144587	0.515905	0.000124351	48.4889	FALSE	TRUE	HbA1c
RXRB	TZDs	rs3104411	6	A	G	32683653	0.00211877	4.59e-34	0.0257819	0.624254	0.000379626	148.068	FALSE	TRUE	HbA1c
RXRB	TZDs	rs3132136	6	A	G	32853987	0.00247093	4.46e-16	0.0200771	0.0497018	0.000169304	66.0205	FALSE	TRUE	HbA1c
RXRB	TZDs	rs33998906	6	T	C	32733628	0.00400358	1.09e-08	-0.0228846	0.0576541	8.38e-05	32.6729	FALSE	TRUE	HbA1c
RXRB	TZDs	rs372546769	6	G	A	32966860	0.00215911	3.51e-09	0.0127513	0.419483	8.94e-05	34.8784	FALSE	TRUE	HbA1c
RXRB	TZDs	rs3892710	6	T	C	32682862	0.0028359	1.52e-08	0.0160504	0.163022	8.22e-05	32.0323	FALSE	TRUE	HbA1c
RXRB	TZDs	rs3957147	6	T	C	32682135	0.00261702	8.24e-45	0.0367566	0.170974	0.000505703	197.267	FALSE	TRUE	HbA1c
RXRB	TZDs	rs60045856	6	G	T	32799845	0.00306257	1.72e-37	0.0391897	0.0785288	0.000419806	163.746	FALSE	TRUE	HbA1c
RXRB	TZDs	rs6938180	6	A	G	32766014	0.00259687	4.92e-21	0.0244386	0.33499	0.000227098	88.5625	FALSE	TRUE	HbA1c
RXRB	TZDs	rs7760769	6	A	G	32746436	0.00202014	5.27e-22	0.0194799	0.505964	0.000238433	92.984	FALSE	TRUE	HbA1c
RXRB	TZDs	rs9275601	6	T	C	32682664	0.00203158	5.84e-17	0.017001	0.417495	0.000179582	70.0291	FALSE	TRUE	HbA1c
RXRB	TZDs	rs9275602	6	A	C	32682812	0.00252484	2.9e-12	0.01763	0.133201	0.000125038	48.7567	FALSE	TRUE	HbA1c
RXRB	TZDs	rs9276084	6	A	C	32696666	0.00289563	5.04e-33	0.0346639	0.186879	0.000367425	143.307	FALSE	TRUE	HbA1c
RXRB	TZDs	rs9276410	6	A	G	32710396	0.00208664	4.15e-14	0.0157669	0.606362	0.000146418	57.0946	FALSE	TRUE	HbA1c
RXRB	TZDs	rs9276434	6	T	C	32712666	0.00300151	9.13e-22	0.0287733	0.909543	0.000235644	91.8962	FALSE	TRUE	HbA1c
SLC47A1	Biguanides	rs9914273	17	C	T	19802247	0.00205947	3.53e-10	-0.0129198	0.397614	0.000100929	39.3549	FALSE	TRUE	HbA1c
GANC	AGI	rs34055060	15	T	C	42115019	0.00202255	1.47e-12	-0.0143138	0.45328	0.000128444	50.0852	FALSE	TRUE	HbA1c
HMGCR	DPP4i	rs28433586	5	G	A	75146775	0.00334928	4.03e-09	-0.0197042	0.114314	8.88e-05	34.6109	FALSE	TRUE	HbA1c
HMGCR	DPP4i	rs6874626	5	A	G	74999576	0.00208674	6.52e-09	-0.0121091	0.369781	8.64e-05	33.6732	FALSE	TRUE	HbA1c
ITGAL	DPP4i	rs13338946	16	C	T	30700858	0.00230049	1e-23	0.0231006	0.284294	0.000258555	100.833	FALSE	TRUE	HbA1c
ITGAL	DPP4i	rs138447338	16	G	A	30513485	0.00384613	4.98e-08	0.0209693	0.0626243	7.62e-05	29.7247	FALSE	TRUE	HbA1c
ITGAL/SLC5A2	DPP4i/SGLT2i	rs17855121	16	C	T	31004169	0.00234045	4e-11	0.0154563	0.289264	0.000111847	43.6124	FALSE	TRUE	HbA1c
ITGAL	DPP4i	rs28421305	16	A	G	30838128	0.00226345	9.41e-25	0.0232506	0.305169	0.000270563	105.517	FALSE	TRUE	HbA1c
ITGAL	DPP4i	rs34114657	16	C	T	30584430	0.00244418	1.66e-21	0.0232786	0.238569	0.000232598	90.7079	FALSE	TRUE	HbA1c
ITGAL	DPP4i	rs3814877	16	T	G	30042677	0.00205025	7.76e-16	0.0165207	0.382704	0.000166506	64.9293	FALSE	TRUE	HbA1c
ITGAL	DPP4i	rs7200879	16	G	A	30947572	0.00235047	1.51e-22	0.0229645	0.250497	0.000244769	95.4558	FALSE	TRUE	HbA1c
GLP1R	GLP-1RA	rs10305518	6	G	T	39055012	0.00437475	2.32e-10	0.0277293	0.0417495	0.000103035	40.1762	FALSE	TRUE	HbA1c
GLP1R	GLP-1RA	rs6904583	6	T	C	39358111	0.0063865	8.02e-09	0.0368369	0.0347913	8.53e-05	33.2689	FALSE	TRUE	HbA1c
GLP1R	GLP-1RA	rs910166	6	A	G	39033168	0.00362703	9.5e-10	0.0221889	0.0745527	9.6e-05	37.4254	FALSE	TRUE	HbA1c
GLP1R	GLP-1RA	rs9470964	6	G	A	39016096	0.0046939	8.12e-09	0.0270651	0.0377734	8.53e-05	33.2468	FALSE	TRUE	HbA1c
SLC5A2	SGLT2i	rs1060506	16	T	C	31133449	0.00222732	4.94e-14	0.0167794	0.296223	0.00014554	56.7526	FALSE	TRUE	HbA1c
SLC5A2	SGLT2i	rs1232538	16	T	G	31833812	0.00225421	1.19e-09	0.0137088	0.307157	9.48e-05	36.9835	FALSE	TRUE	HbA1c
SLC5A2	SGLT2i	rs12929023	16	A	G	31380464	0.00285811	1.54e-08	0.0161699	0.131213	8.21e-05	32.0077	FALSE	TRUE	HbA1c
SLC5A2	SGLT2i	rs12932429	16	C	T	31403145	0.00468892	1.56e-09	-0.0283107	0.944334	9.35e-05	36.4547	FALSE	TRUE	HbA1c
SLC5A2	SGLT2i	rs145785014	16	T	C	31590326	0.0045115	4.39e-10	-0.0281488	0.0646123	9.98e-05	38.9292	FALSE	TRUE	HbA1c
SLC5A2	SGLT2i	rs28675289	16	T	C	31463252	0.00494068	6.75e-15	-0.0384834	0.054672	0.000155584	60.6696	FALSE	TRUE	HbA1c
SLC5A2	SGLT2i	rs28692853	16	A	C	31573030	0.00201656	2.6e-12	-0.0141113	0.488072	0.000125579	48.9677	FALSE	TRUE	HbA1c
SLC5A2	SGLT2i	rs45625038	16	T	C	31418975	0.00590657	2.99e-11	0.0392602	0.0258449	0.000113304	44.1806	FALSE	TRUE	HbA1c
SLC5A2	SGLT2i	rs8050500	16	C	T	31404571	0.00202389	2.9e-38	-0.0261764	0.472167	0.000428863	167.28	FALSE	TRUE	HbA1c
SLC5A2	SGLT2i	rs9923231	16	T	C	31107689	0.00207764	2.15e-08	-0.0116341	0.387674	8.04e-05	31.3562	FALSE	TRUE	HbA1c
SLC5A2	SGLT2i	rs9929691	16	T	C	31552196	0.00281974	1.75e-09	0.0169729	0.161034	9.29e-05	36.232	FALSE	TRUE	HbA1c
SLC5A1	SGLT2i	rs17745316	22	A	G	32446805	0.00303336	3.86e-08	-0.0166748	0.117296	7.75e-05	30.2184	FALSE	TRUE	HbA1c
SLC5A1	SGLT2i	rs3747158	22	A	G	32342976	0.00203813	7.78e-18	-0.0175335	0.398608	0.00018978	74.0067	FALSE	TRUE	HbA1c
SLC5A1	SGLT2i	rs3888536	22	A	G	32547012	0.00212	1.59e-12	-0.0149801	0.326044	0.000128045	49.9293	FALSE	TRUE	HbA1c
SLC5A1	SGLT2i	rs4821001	22	C	T	32344403	0.0035686	8.63e-17	-0.029699	0.0675944	0.000177611	69.2605	FALSE	TRUE	HbA1c
SLC5A1	SGLT2i	rs5753877	22	C	T	32551703	0.00327561	2.55e-08	0.0182437	0.131213	7.96e-05	31.0198	FALSE	TRUE	HbA1c
SLC5A1	SGLT2i	rs5754109	22	A	G	32872593	0.00225549	1.85e-11	0.0151508	0.285288	0.000115717	45.1219	FALSE	TRUE	HbA1c
SLC5A1	SGLT2i	rs75009211	22	C	T	32347308	0.00327228	3.15e-09	0.0193834	0.122266	9e-05	35.0879	FALSE	TRUE	HbA1c
SLC5A1	SGLT2i	rs9606898	22	C	A	32445218	0.00263379	2.11e-19	-0.0237236	0.171968	0.00020805	81.1328	FALSE	TRUE	HbA1c
SLC5A1	SGLT2i	rs9606899	22	C	T	32447811	0.00294201	7.74e-14	-0.0219907	0.137177	0.00014328	55.8711	FALSE	TRUE	HbA1c
RAMP1	Other drugs	rs13007705	2	T	C	239069196	0.00204146	1.36e-10	-0.0131069	0.459245	0.000105714	41.2208	FALSE	TRUE	HbA1c
RAMP2	Other drugs	rs12936169	17	A	G	40824823	0.00223285	1.33e-10	0.0143442	0.264414	0.000105839	41.2697	FALSE	TRUE	HbA1c
RAMP2	Other drugs	rs1905339	17	C	T	40582296	0.00213206	7.39e-11	0.013885	0.312127	0.000108769	42.4122	FALSE	TRUE	HbA1c
RAMP2	Other drugs	rs668799	17	T	C	40716235	0.00224966	1.26e-12	0.0159694	0.259443	0.000129225	50.3896	FALSE	TRUE	HbA1c
RAMP2	Other drugs	rs76264592	17	C	T	40514723	0.00381746	4.8e-08	0.0208376	0.0795229	7.64e-05	29.7951	FALSE	TRUE	HbA1c
RAMP2	Other drugs	rs77348718	17	A	G	40907554	0.00527222	4.89e-09	0.0308468	0.0437376	8.78e-05	34.2319	FALSE	TRUE	HbA1c
RAMP2	Other drugs	rs78114781	17	A	G	40626607	0.0052072	1.47e-10	0.0333718	0.0437376	0.000105333	41.0723	FALSE	TRUE	HbA1c
RAMP2	Other drugs	rs79677630	17	G	T	40748547	0.00524821	4.59e-12	0.036306	0.0427435	0.000122727	47.8555	FALSE	TRUE	HbA1c
RAMP3/GCK	Other drugs	rs12672046	7	C	T	44710488	0.00440299	7.62e-09	-0.0254348	0.0457256	8.56e-05	33.3702	FALSE	TRUE	HbA1c
RAMP3	Other drugs	rs148632219	7	A	G	44886958	0.00902526	7.25e-10	-0.0556001	0.0228628	9.73e-05	37.9515	FALSE	TRUE	HbA1c
GCK	Other drugs	rs10280989	7	C	A	44376326	0.00254254	4.39e-13	-0.0184158	0.166998	0.000134538	52.4618	FALSE	TRUE	HbA1c
GCK	Other drugs	rs112512778	7	A	G	44558012	0.00240219	3.32e-33	-0.0288398	0.205765	0.000369546	144.134	FALSE	TRUE	HbA1c
GCK	Other drugs	rs113816771	7	A	G	44306621	0.00971737	1.2e-08	0.0553825	0.0159046	8.33e-05	32.4822	FALSE	TRUE	HbA1c
GCK	Other drugs	rs113945888	7	G	A	44513935	0.00432766	3.08e-14	0.0328673	0.0616302	0.000147916	57.6792	FALSE	TRUE	HbA1c
GCK	Other drugs	rs117245526	7	C	T	44493343	0.00838274	1.23e-08	0.0477443	0.0159046	8.32e-05	32.4391	FALSE	TRUE	HbA1c
GCK	Other drugs	rs11763759	7	C	T	44570067	0.00225835	4.84e-12	0.0156057	0.289264	0.000122459	47.7509	FALSE	TRUE	HbA1c
GCK	Other drugs	rs11768656	7	T	C	44283661	0.00539685	5.72e-13	-0.0388948	0.027833	0.0001332	51.9398	FALSE	TRUE	HbA1c
GCK	Other drugs	rs11772021	7	T	C	44362545	0.00276594	2.03e-38	-0.0358496	0.159046	0.00043068	167.989	FALSE	TRUE	HbA1c
GCK	Other drugs	rs13438284	7	G	A	44270764	0.00229103	2.63e-20	0.0211528	0.291252	0.000218594	85.2456	FALSE	TRUE	HbA1c
GCK	Other drugs	rs138715366	7	T	C	44246271	0.0108041	4.04e-11	0.0713359	0.0149105	0.000111802	43.595	FALSE	TRUE	HbA1c
GCK	Other drugs	rs141199607	7	G	A	44648557	0.0100265	2.21e-13	-0.0735492	0.0129225	0.000137993	53.809	FALSE	TRUE	HbA1c
GCK	Other drugs	rs145391098	7	A	G	44191553	0.00565266	9.75e-11	-0.036577	0.0328032	0.00010738	41.8705	FALSE	TRUE	HbA1c
GCK	Other drugs	rs2008428	7	C	T	44585052	0.00238703	3.95e-19	-0.0213359	0.255467	0.000204869	79.8921	FALSE	TRUE	HbA1c
GCK	Other drugs	rs2072439	7	A	G	44250826	0.0023858	4.43e-08	0.0130571	0.763419	7.68e-05	29.9518	FALSE	TRUE	HbA1c
GCK	Other drugs	rs2268573	7	G	T	44190468	0.00203253	3.1e-36	0.0255481	0.514911	0.000405067	157.994	FALSE	TRUE	HbA1c
GCK	Other drugs	rs2527786	7	A	G	43965074	0.00469782	2.05e-36	0.059204	0.0656064	0.000407185	158.821	FALSE	TRUE	HbA1c
GCK	Other drugs	rs2595704	7	G	A	44145024	0.00201961	1.06e-15	-0.0161957	0.45328	0.000164912	64.3076	FALSE	TRUE	HbA1c
GCK	Other drugs	rs2908294	7	T	C	44204426	0.0024329	1e-200	0.075046	0.255467	0.00243449	951.49	FALSE	TRUE	HbA1c
GCK	Other drugs	rs2971682	7	A	C	44173815	0.00291953	1.18e-44	0.0409314	0.122266	0.00050388	196.555	FALSE	TRUE	HbA1c
GCK	Other drugs	rs307009	7	C	T	44527685	0.00477854	2.81e-09	-0.0283947	0.95328	9.06e-05	35.3087	FALSE	TRUE	HbA1c
GCK	Other drugs	rs34865291	7	G	A	43864079	0.00437672	4.9e-14	0.0329771	0.0656064	0.000145587	56.7708	FALSE	TRUE	HbA1c
GCK	Other drugs	rs3757840	7	G	T	44231216	0.00201605	1e-200	-0.0628645	0.467197	0.00248763	972.313	FALSE	TRUE	HbA1c
GCK	Other drugs	rs41279627	7	T	C	44571628	0.00478811	1.09e-10	-0.0309052	0.0467197	0.000106843	41.6613	FALSE	TRUE	HbA1c
GCK	Other drugs	rs4517024	7	T	C	44133615	0.00246479	3.89e-25	0.025528	0.246521	0.000275051	107.268	FALSE	TRUE	HbA1c
GCK	Other drugs	rs4724284	7	G	A	44127371	0.00210471	2.42e-09	-0.0125586	0.630219	9.13e-05	35.6037	FALSE	TRUE	HbA1c
GCK	Other drugs	rs4724295	7	G	A	44300964	0.0021085	3.05e-31	-0.0245126	0.351889	0.000346529	135.154	FALSE	TRUE	HbA1c
GCK	Other drugs	rs532853607	7	C	T	43684322	0.00263693	2.03e-09	0.0158086	0.193837	9.22e-05	35.9408	FALSE	TRUE	HbA1c
GCK	Other drugs	rs543179972	7	T	C	44025087	0.00886355	8.61e-15	-0.0687656	0.0139165	0.000154354	60.1901	FALSE	TRUE	HbA1c
GCK	Other drugs	rs59374739	7	G	T	44266570	0.00218575	1.28e-161	0.0592127	0.44831	0.00187876	733.882	FALSE	TRUE	HbA1c
GCK	Other drugs	rs66482342	7	T	C	44319048	0.00390733	1.02e-32	0.0465467	0.0864811	0.000363847	141.911	FALSE	TRUE	HbA1c
GCK	Other drugs	rs6974133	7	A	G	44371518	0.00206172	7.79e-11	0.0134105	0.40159	0.000108503	42.3086	FALSE	TRUE	HbA1c
GCK	Other drugs	rs74897641	7	A	G	44230381	0.00811906	1.64e-34	0.0994744	0.0129225	0.00038486	150.11	FALSE	TRUE	HbA1c
GCK	Other drugs	rs76178320	7	T	C	44198014	0.00835933	3.56e-08	0.0460702	0.0109344	7.79e-05	30.3735	FALSE	TRUE	HbA1c
GCK	Other drugs	rs77888691	7	G	T	44231570	0.00450534	1.81e-08	0.0253614	0.0775348	8.13e-05	31.6876	FALSE	TRUE	HbA1c
GCK	Other drugs	rs79582698	7	A	C	44222998	0.00375811	2.1e-21	-0.035701	0.0695825	0.000231409	90.2443	FALSE	TRUE	HbA1c
AKR1A1	Other drugs	rs12045096	1	G	A	46114428	0.00219183	1.55e-17	-0.0186825	0.286282	0.000186309	72.6531	FALSE	TRUE	HbA1c
AKR1A1	Other drugs	rs34907901	1	G	T	46405214	0.00220626	1.65e-18	-0.0193683	0.266402	0.000197625	77.0668	FALSE	TRUE	HbA1c
AKR1A1	Other drugs	rs4660859	1	T	C	45937750	0.00202512	6.6e-13	0.0145553	0.540755	0.000132478	51.6581	FALSE	TRUE	HbA1c
AKR1A1	Other drugs	rs7540578	1	T	C	46252144	0.00220463	2.44e-18	-0.0192574	0.27833	0.000195658	76.2995	FALSE	TRUE	HbA1c
AKR1A1	Other drugs	rs785509	1	A	G	46527300	0.00220114	1.09e-18	0.0194263	0.730616	0.000199736	77.8902	FALSE	TRUE	HbA1c
Table 3 presents a comprehensive list of single nucleotide polymorphisms (SNPs) and their corresponding effects on HbA1c used for analyzing each drug target. The table categorizes data by drug class (such as Sulfonylureas, Biguanides, SGLT2 inhibitors, etc.) and target gene. For each SNP, the table provides its identifier, chromosomal location (chr.exposure), position (pos.exposure), exposure eff…

## Sheet: Table S5
MR results of drug targets on positive control outcomes
Drug	Target Gene	Outcome	Method	nsnp	β	se	pval
Sulfonylureas	ABCC8/KCNJ11	Glucose(met-d-Glucose)	Inverse variance weighted (multiplicative random effects)	3	0.824421	0.153002	7.11e-08
Sulfonylureas	ABCC8/KCNJ11	Glucose(ebi-a-GCST90014005)	Inverse variance weighted (multiplicative random effects)	3	0.775367	0.0751144	5.58e-25
Sulfonylureas	ABCC8/KCNJ11	Type 2 diabetes(ebi-a-GCST006867)	Inverse variance weighted (multiplicative random effects)	2	2.951	0.229617	8.4e-38
Sulfonylureas	ABCC8/KCNJ11	Type 2 diabetes(finn-b-E4_DM2_STRICT)	Inverse variance weighted (multiplicative random effects)	3	2.10168	0.818287	0.0102174
Sulfonylureas	ABCB11	Glucose(met-d-Glucose)	Inverse variance weighted (multiplicative random effects)	16	0.756513	0.0880911	8.86e-18
Sulfonylureas	ABCB11	Glucose(ebi-a-GCST90014005)	Inverse variance weighted (multiplicative random effects)	16	1.1382	0.094212	1.33e-33
Sulfonylureas	ABCB11	Type 2 diabetes(ebi-a-GCST006867)	Inverse variance weighted (multiplicative random effects)	4	0.148552	0.138324	0.282849
Sulfonylureas	ABCB11	Type 2 diabetes(finn-b-E4_DM2_STRICT)	Inverse variance weighted (multiplicative random effects)	16	0.174729	0.163867	0.286295
Sulfonylureas	CPT1A	Glucose(met-d-Glucose)	Inverse variance weighted (multiplicative random effects)	2	0.277679	0.0169053	1.26e-60
Sulfonylureas	CPT1A	Glucose(ebi-a-GCST90014005)	Inverse variance weighted (multiplicative random effects)	2	0.260862	0.0650694	6.1e-05
Sulfonylureas	CPT1A	Type 2 diabetes(ebi-a-GCST006867)	Wald ratio	1	1.97201	0.655753	0.00263626
Sulfonylureas	CPT1A	Type 2 diabetes(finn-b-E4_DM2_STRICT)	Inverse variance weighted (multiplicative random effects)	2	-0.420815	0.291267	0.148522
Sulfonylureas	INS	Glucose(met-d-Glucose)	Inverse variance weighted (multiplicative random effects)	4	0.397995	0.181223	0.0280808
Sulfonylureas	INS	Glucose(ebi-a-GCST90014005)	Inverse variance weighted (multiplicative random effects)	4	0.530136	0.199907	0.00800368
Sulfonylureas	INS	Type 2 diabetes(finn-b-E4_DM2_STRICT)	Inverse variance weighted (multiplicative random effects)	4	1.80807	0.263142	6.37e-12
Sulfonylureas	KCNJ1	Glucose(met-d-Glucose)	Wald ratio	1	-0.170214	0.311059	0.584235
Sulfonylureas	KCNJ1	Glucose(ebi-a-GCST90014005)	Wald ratio	1	0.0633216	0.171782	0.712415
Sulfonylureas	KCNJ1	Type 2 diabetes(ebi-a-GCST006867)	Wald ratio	1	0.531639	0.586875	0.364998
Insulin	LRP2	Glucose(met-d-Glucose)	Inverse variance weighted (multiplicative random effects)	11	0.896702	0.0615986	5.26e-48
Insulin	LRP2	Glucose(ebi-a-GCST90014005)	Inverse variance weighted (multiplicative random effects)	11	1.27752	0.0610424	2.95e-97
Insulin	LRP2	Type 2 diabetes(ebi-a-GCST006867)	Inverse variance weighted (multiplicative random effects)	3	0.0842283	0.0958568	0.37957
Insulin	LRP2	Type 2 diabetes(finn-b-E4_DM2_STRICT)	Inverse variance weighted (multiplicative random effects)	11	0.161987	0.193301	0.402028
TZDs	PPARG	Glucose(met-d-Glucose)	Inverse variance weighted (multiplicative random effects)	29	0.0878212	0.0576172	0.127454
TZDs	PPARG	Glucose(ebi-a-GCST90014005)	Inverse variance weighted (multiplicative random effects)	29	0.144768	0.0293845	8.36e-07
TZDs	PPARG	Type 2 diabetes(ebi-a-GCST006867)	Inverse variance weighted (multiplicative random effects)	19	0.923684	0.154272	2.13e-09
TZDs	PPARG	Type 2 diabetes(finn-b-E4_DM2_STRICT)	Inverse variance weighted (multiplicative random effects)	27	0.567644	0.19939	0.00441478
Sulfonylureas/TZDs	VEGFA/SLC29A1	Glucose(met-d-Glucose)	Inverse variance weighted (multiplicative random effects)	6	0.170081	0.125313	0.174701
Sulfonylureas/TZDs	VEGFA/SLC29A1	Glucose(ebi-a-GCST90014005)	Inverse variance weighted (multiplicative random effects)	6	0.22185	0.123146	0.0716211
Sulfonylureas/TZDs	VEGFA/SLC29A1	Type 2 diabetes(ebi-a-GCST006867)	Inverse variance weighted (multiplicative random effects)	2	1.6935	0.778761	0.0296596
Sulfonylureas/TZDs	VEGFA/SLC29A1	Type 2 diabetes(finn-b-E4_DM2_STRICT)	Inverse variance weighted (multiplicative random effects)	6	1.50635	0.283751	1.1e-07
TZDs	ESRRA	Glucose(met-d-Glucose)	Wald ratio	1	0.593094	0.344286	0.0849471
TZDs	ESRRA	Glucose(ebi-a-GCST90014005)	Wald ratio	1	0.135803	0.189576	0.473773
TZDs	ESRRA	Type 2 diabetes(finn-b-E4_DM2_STRICT)	Wald ratio	1	1.10717	0.647813	0.0874341
TZDs	RXRB	Glucose(met-d-Glucose)	Inverse variance weighted (multiplicative random effects)	26	0.165752	0.0350136	2.2e-06
TZDs	RXRB	Glucose(ebi-a-GCST90014005)	Inverse variance weighted (multiplicative random effects)	26	0.273976	0.0302871	1.48e-19
TZDs	RXRB	Type 2 diabetes(ebi-a-GCST006867)	Inverse variance weighted (multiplicative random effects)	4	0.944372	0.239268	7.92e-05
TZDs	RXRB	Type 2 diabetes(finn-b-E4_DM2_STRICT)	Inverse variance weighted (multiplicative random effects)	22	0.165752	0.183533	0.366464
Biguanides	SLC47A1	Glucose(met-d-Glucose)	Wald ratio	1	-0.0475234	0.329086	0.885176
Biguanides	SLC47A1	Glucose(ebi-a-GCST90014005)	Wald ratio	1	0.0783774	0.180834	0.664709
Biguanides	SLC47A1	Type 2 diabetes(ebi-a-GCST006867)	Wald ratio	1	1.30033	0.572764	0.0231912
Biguanides	SLC47A1	Type 2 diabetes(finn-b-E4_DM2_STRICT)	Wald ratio	1	1.03717	0.874627	0.235685
AGI	GANC	Glucose(met-d-Glucose)	Wald ratio	1	0.397567	0.291804	0.173057
AGI	GANC	Glucose(ebi-a-GCST90014005)	Wald ratio	1	0.519912	0.16094	0.00123586
AGI	GANC	Type 2 diabetes(ebi-a-GCST006867)	Wald ratio	1	2.08191	0.551915	0.000161846
AGI	GANC	Type 2 diabetes(finn-b-E4_DM2_STRICT)	Wald ratio	1	1.7815	0.761503	0.0193122
DPP4i	HMGCR	Glucose(met-d-Glucose)	Inverse variance weighted (multiplicative random effects)	2	0.061912	0.430963	0.885769
DPP4i	HMGCR	Glucose(ebi-a-GCST90014005)	Inverse variance weighted (multiplicative random effects)	2	0.042098	0.0734343	0.566459
DPP4i	HMGCR	Type 2 diabetes(ebi-a-GCST006867)	Wald ratio	1	3.26201	0.619369	1.39e-07
DPP4i	HMGCR	Type 2 diabetes(finn-b-E4_DM2_STRICT)	Inverse variance weighted (multiplicative random effects)	2	1.61964	0.950231	0.0882942
DPP4i	ITGAL	Glucose(met-d-Glucose)	Inverse variance weighted (multiplicative random effects)	7	0.277552	0.0733522	0.000154433
DPP4i	ITGAL	Glucose(ebi-a-GCST90014005)	Inverse variance weighted (multiplicative random effects)	7	0.323164	0.0472153	7.68e-12
DPP4i	ITGAL	Type 2 diabetes(ebi-a-GCST006867)	Inverse variance weighted (multiplicative random effects)	5	0.830112	0.301861	0.00595979
DPP4i	ITGAL	Type 2 diabetes(finn-b-E4_DM2_STRICT)	Inverse variance weighted (multiplicative random effects)	7	0.673501	0.19544	0.000568786
GLP-1RA	GLP1R	Glucose(met-d-Glucose)	Inverse variance weighted (multiplicative random effects)	4	0.637072	0.117457	5.83e-08
GLP-1RA	GLP1R	Glucose(ebi-a-GCST90014005)	Inverse variance weighted (multiplicative random effects)	4	0.64959	0.109353	2.85e-09
GLP-1RA	GLP1R	Type 2 diabetes(ebi-a-GCST006867)	Inverse variance weighted (multiplicative random effects)	4	1.42995	0.253366	1.66e-08
GLP-1RA	GLP1R	Type 2 diabetes(finn-b-E4_DM2_STRICT)	Inverse variance weighted (multiplicative random effects)	4	1.93479	0.808563	0.0167171
SGLT2i	SLC5A2	Glucose(met-d-Glucose)	Inverse variance weighted (multiplicative random effects)	12	0.0669652	0.0652045	0.304419
SGLT2i	SLC5A2	Glucose(ebi-a-GCST90014005)	Inverse variance weighted (multiplicative random effects)	12	0.226647	0.0519712	1.29e-05
SGLT2i	SLC5A2	Type 2 diabetes(ebi-a-GCST006867)	Inverse variance weighted (multiplicative random effects)	5	1.23839	0.238972	2.19e-07
SGLT2i	SLC5A2	Type 2 diabetes(finn-b-E4_DM2_STRICT)	Inverse variance weighted (multiplicative random effects)	12	0.286063	0.151974	0.0597927
SGLT2i	SLC5A1	Glucose(met-d-Glucose)	Inverse variance weighted (multiplicative random effects)	9	0.248655	0.105396	0.0183123
SGLT2i	SLC5A1	Glucose(ebi-a-GCST90014005)	Inverse variance weighted (multiplicative random effects)	9	0.362473	0.042195	8.67e-18
SGLT2i	SLC5A1	Type 2 diabetes(ebi-a-GCST006867)	Inverse variance weighted (multiplicative random effects)	8	1.1955	0.151527	3.03e-15
SGLT2i	SLC5A1	Type 2 diabetes(finn-b-E4_DM2_STRICT)	Inverse variance weighted (multiplicative random effects)	8	0.63741	0.259251	0.0139456
Other drugs	RAMP1	Glucose(met-d-Glucose)	Wald ratio	1	-0.0231834	0.318639	0.941999
Other drugs	RAMP1	Glucose(ebi-a-GCST90014005)	Wald ratio	1	-0.267258	0.177526	0.132206
Other drugs	RAMP1	Type 2 diabetes(ebi-a-GCST006867)	Wald ratio	1	0.770586	0.602736	0.20108
Other drugs	RAMP1	Type 2 diabetes(finn-b-E4_DM2_STRICT)	Wald ratio	1	1.06814	0.846882	0.207215
Other drugs	RAMP2	Glucose(met-d-Glucose)	Inverse variance weighted (multiplicative random effects)	7	-0.144715	0.112798	0.19951
Other drugs	RAMP2	Glucose(ebi-a-GCST90014005)	Inverse variance weighted (multiplicative random effects)	7	0.130524	0.0905771	0.149578
Other drugs	RAMP2	Type 2 diabetes(ebi-a-GCST006867)	Inverse variance weighted (multiplicative random effects)	4	3.05767	0.294934	3.49e-25
Other drugs	RAMP2	Type 2 diabetes(finn-b-E4_DM2_STRICT)	Inverse variance weighted (multiplicative random effects)	6	2.3525	0.175485	5.6e-41
Other drugs	RAMP3	Glucose(met-d-Glucose)	Inverse variance weighted (multiplicative random effects)	2	0.327065	0.313954	0.297521
Other drugs	RAMP3	Glucose(ebi-a-GCST90014005)	Inverse variance weighted (multiplicative random effects)	2	0.721039	0.120808	2.4e-09
Other drugs	RAMP3	Type 2 diabetes(ebi-a-GCST006867)	Wald ratio	1	1.77709	0.68017	0.00898257
Other drugs	RAMP3	Type 2 diabetes(finn-b-E4_DM2_STRICT)	Inverse variance weighted (multiplicative random effects)	2	0.120711	1.36045	0.929297
Other drugs	GCK	Glucose(met-d-Glucose)	Inverse variance weighted (multiplicative random effects)	37	0.587789	0.0433361	6.59e-42
Other drugs	GCK	Glucose(ebi-a-GCST90014005)	Inverse variance weighted (multiplicative random effects)	37	0.983673	0.0373357	5.6e-153
Other drugs	GCK	Type 2 diabetes(ebi-a-GCST006867)	Inverse variance weighted (multiplicative random effects)	10	0.480063	0.0904922	1.13e-07
Other drugs	GCK	Type 2 diabetes(finn-b-E4_DM2_STRICT)	Inverse variance weighted (multiplicative random effects)	35	1.01203	0.130799	1.02e-14
Other drugs	AKR1A1	Glucose(met-d-Glucose)	Inverse variance weighted (multiplicative random effects)	5	0.623168	0.108022	7.98e-09
Other drugs	AKR1A1	Glucose(ebi-a-GCST90014005)	Inverse variance weighted (multiplicative random effects)	5	0.207303	0.00689031	7.34e-199
Other drugs	AKR1A1	Type 2 diabetes(ebi-a-GCST006867)	Inverse variance weighted (multiplicative random effects)	5	0.999297	0.089346	4.85e-29
Other drugs	AKR1A1	Type 2 diabetes(finn-b-E4_DM2_STRICT)	Inverse variance weighted (multiplicative random effects)	5	0.896016	0.374162	0.0166329
Sulfonylureas	ABCC8/KCNJ11+ABCB11+CPT1A+INS+PPARG+VEGFA	Glucose(met-d-Glucose)	Inverse variance weighted (multiplicative random effects)	60	0.338298	0.0565111	2.14539e-09
Sulfonylureas	ABCC8/KCNJ11+ABCB11+CPT1A+INS+PPARG+VEGFA	Glucose(ebi-a-GCST90014005)	Inverse variance weighted (multiplicative random effects)	60	0.484366	0.0654878	1.40057e-13
Sulfonylureas	ABCC8/KCNJ11+ABCB11+CPT1A+INS+PPARG+VEGFA	Type 2 diabetes(ebi-a-GCST006867)	Inverse variance weighted (multiplicative random effects)	28	0.96915	0.170593	1.33853e-08
Sulfonylureas	ABCC8/KCNJ11+ABCB11+CPT1A+INS+PPARG+VEGFA	Type 2 diabetes(finn-b-E4_DM2_STRICT)	Inverse variance weighted (multiplicative random effects)	58	0.68575	0.136832	5.39764e-07
TZDs	SLC29A1+RXRB+PPARG	Glucose(met-d-Glucose)	Inverse variance weighted (multiplicative random effects)	55	0.127533	0.034081	0.000182519
TZDs	SLC29A1+RXRB+PPARG	Glucose(ebi-a-GCST90014005)	Inverse variance weighted (multiplicative random effects)	55	0.210718	0.0226542	1.38495e-20
TZDs	SLC29A1+RXRB+PPARG	Type 2 diabetes(ebi-a-GCST006867)	Inverse variance weighted (multiplicative random effects)	23	0.928875	0.128643	5.17737e-13
TZDs	SLC29A1+RXRB+PPARG	Type 2 diabetes(finn-b-E4_DM2_STRICT)	Inverse variance weighted (multiplicative random effects)	49	0.39218	0.139264	0.00486129
DDP4i	HMGCR+ITGAL	Glucose(met-d-Glucose)	Inverse variance weighted (multiplicative random effects)	9	0.253009	0.0824911	0.00216146
DDP4i	HMGCR+ITGAL	Glucose(ebi-a-GCST90014005)	Inverse variance weighted (multiplicative random effects)	9	0.291176	0.0505404	8.34926e-09
DDP4i	HMGCR+ITGAL	Type 2 diabetes(ebi-a-GCST006867)	Inverse variance weighted (multiplicative random effects)	6	1.02259	0.391577	0.00901575
DDP4i	HMGCR+ITGAL	Type 2 diabetes(finn-b-E4_DM2_STRICT)	Inverse variance weighted (multiplicative random effects)	9	0.793816	0.227546	0.000485567
SGLT2i	SLC5A1+SLC5A2	Glucose(met-d-Glucose)	Inverse variance weighted (multiplicative random effects)	21	0.144116	0.060295	0.0168398
SGLT2i	SLC5A1+SLC5A2	Glucose(ebi-a-GCST90014005)	Inverse variance weighted (multiplicative random effects)	21	0.28458	0.0371661	1.90347e-14
SGLT2i	SLC5A1+SLC5A2	Type 2 diabetes(ebi-a-GCST006867)	Inverse variance weighted (multiplicative random effects)	13	1.21009	0.123885	1.54705e-22
SGLT2i	SLC5A1+SLC5A2	Type 2 diabetes(finn-b-E4_DM2_STRICT)	Inverse variance weighted (multiplicative random effects)	20	0.418007	0.138465	0.00253727
This table presents the Mendelian Randomization (MR) results for drug targets on positive control outcomes focusing on glucose levels and Type 2 diabetes. This table breaks down the analysis by drug and associated target genes, listing results across several genomic datasets，MR methods, number of snp(nsnp) and their effects on specific outcomes. For each drug target gene, the table provides effec…

## Sheet: Table S6
MR results of drug targets on ovarian cancer with different methods and tests
Drugs	Target Genes	outcome	method	nsnp	β	β_scaled	se	pval	OR(95%CI)	P_pleio	Q	Q_pval	Higgens I2
Sulfonylureas	ABCC8/KCNJ11	All OC	IVW(MRE)	3	0.430928	0.555774	0.583163	0.459937	1.539(0.491-4.826)	0.369518	2.61819	0.270065	0.2361
Sulfonylureas	ABCC8/KCNJ11	All OC	IVW(FE)	3	0.430928	0.555774	0.509688	0.397846	1.539(0.567-4.178)	0.369518	2.61819	0.270065	0.2361
Sulfonylureas	ABCC8/KCNJ11	All OC	Weighted median	3	0.582875	0.751741	0.536111	0.276936	1.791(0.587-5.466)	0.369518	2.61819	0.270065	0.2361
Sulfonylureas	ABCC8/KCNJ11	All OC	Weighted mode	3	0.824488	1.06335	0.672804	0.345131	2.281(0.687-7.572)	0.369518	2.61819	0.270065	0.2361
Sulfonylureas	ABCC8/KCNJ11	HGSOC	IVW(MRE)	3	0.593185	0.765038	0.458943	0.196184	1.81(0.736-4.449)	0.505079	1.15109	0.562398	0
Sulfonylureas	ABCC8/KCNJ11	HGSOC	IVW(FE)	3	0.593185	0.765038	0.604949	0.326813	1.81(0.553-5.923)	0.505079	1.15109	0.562398	0
Sulfonylureas	ABCC8/KCNJ11	HGSOC	Weighted median	3	0.676564	0.872573	0.633041	0.285181	1.967(0.543-7.132)	0.505079	1.15109	0.562398	0
Sulfonylureas	ABCC8/KCNJ11	HGSOC	Weighted mode	3	0.925849	1.19408	0.678916	0.305861	2.524(0.662-9.629)	0.505079	1.15109	0.562398	0
Sulfonylureas	ABCC8/KCNJ11	LGSOC	IVW(MRE)	3	-0.394254	-0.508475	0.555591	0.477944	0.674(0.227-2.003)	0.92202	0.185053	0.911625	0
Sulfonylureas	ABCC8/KCNJ11	LGSOC	IVW(FE)	3	-0.394254	-0.508475	1.82651	0.829104	0.674(0.019-24.184)	0.92202	0.185053	0.911625	0
Sulfonylureas	ABCC8/KCNJ11	LGSOC	Weighted median	3	-0.245767	-0.316969	2.02792	0.903539	0.782(0.019-32.813)	0.92202	0.185053	0.911625	0
Sulfonylureas	ABCC8/KCNJ11	LGSOC	Weighted mode	3	-0.0382127	-0.0492834	2.15021	0.987435	0.963(0.015-60.053)	0.92202	0.185053	0.911625	0
Sulfonylureas	ABCC8/KCNJ11	Clear cell OC	IVW(MRE)	3	2.29165	2.95557	0.649288	0.000416377	9.891(2.771-35.313)	0.681214	0.352612	0.838361	0
Sulfonylureas	ABCC8/KCNJ11	Clear cell OC	IVW(FE)	3	2.29165	2.95557	1.54634	0.138344	9.891(0.478-204.888)	0.681214	0.352612	0.838361	0
Sulfonylureas	ABCC8/KCNJ11	Clear cell OC	Weighted median	3	2.41256	3.11151	1.67448	0.149646	11.162(0.459-271.689)	0.681214	0.352612	0.838361	0
Sulfonylureas	ABCC8/KCNJ11	Clear cell OC	Weighted mode	3	2.7582	3.55729	1.79563	0.264316	15.771(0.472-526.933)	0.681214	0.352612	0.838361	0
Sulfonylureas	ABCC8/KCNJ11	Mucinous OC	IVW(MRE)	3	-1.47599	-1.9036	0.906565	0.103502	0.229(0.039-1.351)	0.501405	1.24918	0.535481	0
Sulfonylureas	ABCC8/KCNJ11	Mucinous OC	IVW(FE)	3	-1.47599	-1.9036	1.1471	0.198195	0.229(0.024-2.165)	0.501405	1.24918	0.535481	0
Sulfonylureas	ABCC8/KCNJ11	Mucinous OC	Weighted median	3	-1.33114	-1.71678	1.23894	0.282636	0.264(0.022-3.214)	0.501405	1.24918	0.535481	0
Sulfonylureas	ABCC8/KCNJ11	Mucinous OC	Weighted mode	3	-0.801451	-1.03364	1.32754	0.607389	0.449(0.035-5.784)	0.501405	1.24918	0.535481	0
Sulfonylureas	ABCC8/KCNJ11	Endometrioid OC	IVW(MRE)	3	0.93717	1.20868	1.22133	0.442882	2.553(0.233-27.966)	0.366677	2.4437	0.294684	0.1816
Sulfonylureas	ABCC8/KCNJ11	Endometrioid OC	IVW(FE)	3	0.93717	1.20868	1.1049	0.396331	2.553(0.293-22.26)	0.366677	2.4437	0.294684	0.1816
Sulfonylureas	ABCC8/KCNJ11	Endometrioid OC	Weighted median	3	1.54145	1.98803	1.272	0.225575	4.671(0.416-52.468)	0.366677	2.4437	0.294684	0.1816
Sulfonylureas	ABCC8/KCNJ11	Endometrioid OC	Weighted mode	3	1.7043	2.19806	1.36348	0.337745	5.498(0.359-84.2)	0.366677	2.4437	0.294684	0.1816
Sulfonylureas	ABCC8/KCNJ11	HGSOC (survival)	IVW(MRE)	3	-0.453257	-0.584571	0.730003	0.534668	0.636(0.152-2.658)	0.89306	1.708	0.425708	0
Sulfonylureas	ABCC8/KCNJ11	HGSOC (survival)	IVW(FE)	3	-0.453257	-0.584571	0.789942	0.566114	0.636(0.135-2.989)	0.89306	1.708	0.425708	0
Sulfonylureas	ABCC8/KCNJ11	HGSOC (survival)	Weighted median	3	-0.168215	-0.216949	0.876795	0.847858	0.845(0.159-4.494)	0.89306	1.708	0.425708	0
Sulfonylureas	ABCC8/KCNJ11	HGSOC (survival)	Weighted mode	3	0.0231798	0.0298953	0.907242	0.981937	1.023(0.157-6.662)	0.89306	1.708	0.425708	0
Sulfonylureas	ABCC8/KCNJ11	All OC (Histology Unadjusted)	IVW(MRE)	3	-0.463635	-0.597956	1.09251	0.671293	0.629(0.074-5.353)	0.808582	5.26816	0.071785	0.6204
Sulfonylureas	ABCC8/KCNJ11	All OC (Histology Unadjusted)	IVW(FE)	3	-0.463635	-0.597956	0.673152	0.490979	0.629(0.168-2.353)	0.808582	5.26816	0.071785	0.6204
Sulfonylureas	ABCC8/KCNJ11	All OC (Histology Unadjusted)	Weighted median	3	0.107676	0.138871	0.785502	0.890968	1.114(0.242-5.129)	0.808582	5.26816	0.071785	0.6204
Sulfonylureas	ABCC8/KCNJ11	All OC (Histology Unadjusted)	Weighted mode	3	0.186573	0.240626	0.802268	0.837737	1.205(0.268-5.421)	0.808582	5.26816	0.071785	0.6204
Sulfonylureas	ABCC8/KCNJ11	All OC (Histology Adjusted)	IVW(MRE)	3	-0.607443	-0.783427	0.823695	0.460842	0.545(0.108-2.737)	0.940756	2.97688	0.225725	0.3282
Sulfonylureas	ABCC8/KCNJ11	All OC (Histology Adjusted)	IVW(FE)	3	-0.607443	-0.783427	0.675151	0.368272	0.545(0.145-2.046)	0.940756	2.97688	0.225725	0.3282
Sulfonylureas	ABCC8/KCNJ11	All OC (Histology Adjusted)	Weighted median	3	-0.108405	-0.139811	0.750679	0.885178	0.897(0.216-3.726)	0.940756	2.97688	0.225725	0.3282
Sulfonylureas	ABCC8/KCNJ11	All OC (Histology Adjusted)	Weighted mode	3	-0.0793489	-0.102337	0.820773	0.931799	0.924(0.201-4.254)	0.940756	2.97688	0.225725	0.3282
Sulfonylureas	ABCB11	All OC	IVW(MRE)	16	0.0820788	0.0721125	0.183125	0.654001	1.086(0.758-1.554)	0.496714	10.8168	0.765472	0
Sulfonylureas	ABCB11	All OC	IVW(FE)	16	0.0820788	0.0721125	0.215648	0.703489	1.086(0.711-1.657)	0.496714	10.8168	0.765472	0
Sulfonylureas	ABCB11	All OC	Weighted median	16	-0.0998725	-0.0877456	0.288396	0.729115	0.905(0.518-1.581)	0.496714	10.8168	0.765472	0
Sulfonylureas	ABCB11	All OC	Weighted mode	16	-0.251585	-0.221037	0.363279	0.49918	0.778(0.372-1.626)	0.496714	10.8168	0.765472	0
Sulfonylureas	ABCB11	HGSOC	IVW(MRE)	16	0.29557	0.259681	0.178321	0.0974149	1.344(0.947-1.906)	0.603577	7.24655	0.950443	0
Sulfonylureas	ABCB11	HGSOC	IVW(FE)	16	0.29557	0.259681	0.256556	0.249293	1.344(0.813-2.222)	0.603577	7.24655	0.950443	0
Sulfonylureas	ABCB11	HGSOC	Weighted median	16	0.22555	0.198163	0.337806	0.504331	1.253(0.644-2.438)	0.603577	7.24655	0.950443	0
Sulfonylureas	ABCB11	HGSOC	Weighted mode	16	0.196644	0.172767	0.426228	0.651161	1.217(0.538-2.754)	0.603577	7.24655	0.950443	0
Sulfonylureas	ABCB11	LGSOC	IVW(MRE)	16	-1.07267	-0.942425	0.772794	0.165123	0.342(0.075-1.556)	0.823252	14.9364	0.456007	0
Sulfonylureas	ABCB11	LGSOC	IVW(FE)	16	-1.07267	-0.942425	0.774437	0.166022	0.342(0.075-1.561)	0.823252	14.9364	0.456007	0
Sulfonylureas	ABCB11	LGSOC	Weighted median	16	-1.9482	-1.71165	1.08111	0.0715384	0.143(0.018-1.141)	0.823252	14.9364	0.456007	0
Sulfonylureas	ABCB11	LGSOC	Weighted mode	16	-2.31458	-2.03354	1.32053	0.10005	0.099(0.007-1.368)	0.823252	14.9364	0.456007	0
Sulfonylureas	ABCB11	Clear cell OC	IVW(MRE)	16	-0.00503106	-0.00442017	0.713588	0.994375	0.995(0.246-4.029)	0.658876	18.1634	0.254173	0.1742
Sulfonylureas	ABCB11	Clear cell OC	IVW(FE)	16	-0.00503106	-0.00442017	0.648477	0.99381	0.995(0.279-3.547)	0.658876	18.1634	0.254173	0.1742
Sulfonylureas	ABCB11	Clear cell OC	Weighted median	16	-0.312998	-0.274993	0.924054	0.734819	0.731(0.117-4.559)	0.658876	18.1634	0.254173	0.1742
Sulfonylureas	ABCB11	Clear cell OC	Weighted mode	16	-0.780799	-0.685991	1.17893	0.51783	0.458(0.041-5.153)	0.658876	18.1634	0.254173	0.1742
Sulfonylureas	ABCB11	Mucinous OC	IVW(MRE)	16	-0.969738	-0.851989	0.601506	0.106922	0.379(0.117-1.233)	0.745383	22.3259	0.0995401	0.3281
Sulfonylureas	ABCB11	Mucinous OC	IVW(FE)	16	-0.969738	-0.851989	0.493039	0.0491996	0.379(0.144-0.997)	0.745383	22.3259	0.0995401	0.3281
Sulfonylureas	ABCB11	Mucinous OC	Weighted median	16	-1.13827	-1.00006	0.756774	0.132553	0.32(0.076-1.349)	0.745383	22.3259	0.0995401	0.3281
Sulfonylureas	ABCB11	Mucinous OC	Weighted mode	16	0.283128	0.24875	1.32067	0.833136	1.327(0.092-19.113)	0.745383	22.3259	0.0995401	0.3281
Sulfonylureas	ABCB11	Endometrioid OC	IVW(MRE)	16	-0.180948	-0.158976	0.396646	0.64825	0.834(0.384-1.816)	0.779556	10.9312	0.757458	0
Sulfonylureas	ABCB11	Endometrioid OC	IVW(FE)	16	-0.180948	-0.158976	0.464639	0.696953	0.834(0.336-2.075)	0.779556	10.9312	0.757458	0
Sulfonylureas	ABCB11	Endometrioid OC	Weighted median	16	-0.338045	-0.296998	0.643815	0.599538	0.713(0.202-2.518)	0.779556	10.9312	0.757458	0
Sulfonylureas	ABCB11	Endometrioid OC	Weighted mode	16	0.412455	0.362373	0.860211	0.638513	1.511(0.275-8.302)	0.779556	10.9312	0.757458	0
Sulfonylureas	ABCB11	HGSOC (survival)	IVW(MRE)	16	0.101801	0.0894398	0.309059	0.741861	1.107(0.604-2.029)	0.63726	12.9132	0.609005	0
Sulfonylureas	ABCB11	HGSOC (survival)	IVW(FE)	16	0.101801	0.0894398	0.333097	0.759894	1.107(0.576-2.127)	0.63726	12.9132	0.609005	0
Sulfonylureas	ABCB11	HGSOC (survival)	Weighted median	16	0.0188504	0.0165615	0.46724	0.967819	1.019(0.403-2.578)	0.63726	12.9132	0.609005	0
Sulfonylureas	ABCB11	HGSOC (survival)	Weighted mode	16	0.0941104	0.0826832	0.678589	0.891543	1.099(0.285-4.231)	0.63726	12.9132	0.609005	0
Sulfonylureas	ABCB11	All OC (Histology Unadjusted)	IVW(MRE)	16	0.0350232	0.0307705	0.270253	0.896888	1.036(0.61-1.759)	0.836319	13.7008	0.548335	0
Sulfonylureas	ABCB11	All OC (Histology Unadjusted)	IVW(FE)	16	0.0350232	0.0307705	0.282777	0.90143	1.036(0.595-1.803)	0.836319	13.7008	0.548335	0
Sulfonylureas	ABCB11	All OC (Histology Unadjusted)	Weighted median	16	0.230473	0.202488	0.407467	0.571649	1.259(0.57-2.784)	0.836319	13.7008	0.548335	0
Sulfonylureas	ABCB11	All OC (Histology Unadjusted)	Weighted mode	16	0.716257	0.629287	0.73197	0.34333	2.047(0.535-7.824)	0.836319	13.7008	0.548335	0
Sulfonylureas	ABCB11	All OC (Histology Adjusted)	IVW(MRE)	16	0.148867	0.130791	0.285016	0.601453	1.161(0.664-2.029)	0.974228	15.1493	0.440719	0.0099
Sulfonylureas	ABCB11	All OC (Histology Adjusted)	IVW(FE)	16	0.148867	0.130791	0.283608	0.599649	1.161(0.666-2.023)	0.974228	15.1493	0.440719	0.0099
Sulfonylureas	ABCB11	All OC (Histology Adjusted)	Weighted median	16	0.366851	0.322307	0.412483	0.373803	1.443(0.662-3.147)	0.974228	15.1493	0.440719	0.0099
Sulfonylureas	ABCB11	All OC (Histology Adjusted)	Weighted mode	16	0.834239	0.732943	0.766904	0.293853	2.303(0.582-9.117)	0.974228	15.1493	0.440719	0.0099
Sulfonylureas	CPT1A	All OC	IVW(MRE)	2	1.35793	5.20557	0.865708	0.116745	3.888(0.713-21.215)	NA	1.16018	0.281428	0.1381
Sulfonylureas	CPT1A	All OC	IVW(FE)	2	1.35793	5.20557	0.803727	0.0911146	3.888(0.805-18.788)	NA	1.16018	0.281428	0.1381
Sulfonylureas	CPT1A	HGSOC	IVW(MRE)	2	0.595791	2.28393	1.14422	0.602578	1.814(0.193-17.089)	NA	1.42896	0.231934	0.3002
Sulfonylureas	CPT1A	HGSOC	IVW(FE)	2	0.595791	2.28393	0.957191	0.533654	1.814(0.278-11.845)	NA	1.42896	0.231934	0.3002
Sulfonylureas	CPT1A	LGSOC	IVW(MRE)	2	-1.97228	-7.56064	0.180377	7.91e-28	0.139(0.098-0.198)	NA	0.00367285	0.951675	0
Sulfonylureas	CPT1A	LGSOC	IVW(FE)	2	-1.97228	-7.56064	2.97631	0.507549	0.139(0-47.527)	NA	0.00367285	0.951675	0
Sulfonylureas	CPT1A	Clear cell OC	IVW(MRE)	2	2.47923	9.50398	0.973445	0.0108697	11.932(1.771-80.413)	NA	0.157809	0.691182	0
Sulfonylureas	CPT1A	Clear cell OC	IVW(FE)	2	2.47923	9.50398	2.45045	0.31166	11.932(0.098-1454.041)	NA	0.157809	0.691182	0
Sulfonylureas	CPT1A	Mucinous OC	IVW(MRE)	2	-1.93337	-7.41145	2.72015	0.477234	0.145(0.001-29.908)	NA	2.15175	0.142407	0.5353
Sulfonylureas	CPT1A	Mucinous OC	IVW(FE)	2	-1.93337	-7.41145	1.85437	0.297133	0.145(0.004-5.481)	NA	2.15175	0.142407	0.5353
Sulfonylureas	CPT1A	Endometrioid OC	IVW(MRE)	2	4.01142	15.3775	0.625066	1.38e-10	55.225(16.221-188.019)	NA	0.136043	0.712247	0
Sulfonylureas	CPT1A	Endometrioid OC	IVW(FE)	2	4.01142	15.3775	1.69468	0.01793	55.225(1.993-1529.952)	NA	0.136043	0.712247	0
Sulfonylureas	CPT1A	HGSOC (survival)	IVW(MRE)	2	-0.917579	-3.51749	0.188645	1.15e-06	0.399(0.276-0.578)	NA	0.0233945	0.878436	0
Sulfonylureas	CPT1A	HGSOC (survival)	IVW(FE)	2	-0.917579	-3.51749	1.23335	0.456894	0.399(0.036-4.481)	NA	0.0233945	0.878436	0
Sulfonylureas	CPT1A	All OC (Histology Unadjusted)	IVW(MRE)	2	-1.0936	-4.19226	0.48126	0.0230642	0.335(0.13-0.86)	NA	0.210957	0.646019	0
Sulfonylureas	CPT1A	All OC (Histology Unadjusted)	IVW(FE)	2	-1.0936	-4.19226	1.04781	0.296624	0.335(0.043-2.612)	NA	0.210957	0.646019	0
Sulfonylureas	CPT1A	All OC (Histology Adjusted)	IVW(MRE)	2	-1.02559	-3.93154	0.53904	0.0570897	0.359(0.125-1.031)	NA	0.262657	0.6083	0
Sulfonylureas	CPT1A	All OC (Histology Adjusted)	IVW(FE)	2	-1.02559	-3.93154	1.05178	0.329512	0.359(0.046-2.818)	NA	0.262657	0.6083	0
Sulfonylureas/TZDs	PPARG	All OC	IVW(MRE)	29	-1.04389	-7.21078	0.16448	0.534593	0.352(0.171-0.727)	0.82672	32.5553	0.252505	0.1399
Sulfonylureas/TZDs	PPARG	All OC	IVW(FE)	29	-1.04389	-7.21078	0.152539	0.503098	0.352(0.157-0.788)	0.82672	32.5553	0.252505	0.1399
Sulfonylureas/TZDs	PPARG	All OC	Weighted median	29	-0.967315	-6.68185	0.218423	0.752544	0.38(0.145-0.994)	0.82672	32.5553	0.252505	0.1399
Sulfonylureas/TZDs	PPARG	All OC	Weighted mode	29	-0.730961	-5.04921	0.287999	0.852144	0.481(0.155-1.493)	0.82672	32.5553	0.252505	0.1399
Sulfonylureas/TZDs	PPARG	HGSOC	IVW(MRE)	29	-1.24872	-8.6257	0.186915	0.996421	0.287(0.079-1.035)	0.415664	29.7285	0.37631	0.0581
Sulfonylureas/TZDs	PPARG	HGSOC	IVW(FE)	29	-1.24872	-8.6257	0.181399	0.996312	0.287(0.11-0.748)	0.415664	29.7285	0.37631	0.0581
Sulfonylureas/TZDs	PPARG	HGSOC	Weighted median	29	-1.00301	-6.92839	0.265191	0.88788	0.367(0.112-1.206)	0.415664	29.7285	0.37631	0.0581
Sulfonylureas/TZDs	PPARG	HGSOC	Weighted mode	29	-0.648505	-4.47963	0.319435	0.976367	0.523(0.138-1.984)	0.415664	29.7285	0.37631	0.0581
Sulfonylureas/TZDs	PPARG	LGSOC	IVW(MRE)	29	-1.14069	-7.87947	0.378999	0.0995524	0.32(0.061-1.667)	0.502851	13.2033	0.991945	0
Sulfonylureas/TZDs	PPARG	LGSOC	IVW(FE)	29	-1.14069	-7.87947	0.55192	0.258055	0.32(0.017-5.936)	0.502851	13.2033	0.991945	0
Sulfonylureas/TZDs	PPARG	LGSOC	Weighted median	29	-0.746443	-5.15615	0.808232	0.450803	0.474(0.018-12.261)	0.502851	13.2033	0.991945	0
Sulfonylureas/TZDs	PPARG	LGSOC	Weighted mode	29	-0.420793	-2.90668	1.08109	0.59029	0.657(0.015-29.702)	0.502851	13.2033	0.991945	0
Sulfonylureas/TZDs	PPARG	Clear cell OC	IVW(MRE)	29	-0.806894	-5.57372	0.344858	0.657832	0.446(0.029-6.807)	0.731036	15.6383	0.970878	0
Sulfonylureas/TZDs	PPARG	Clear cell OC	IVW(FE)	29	-0.806894	-5.57372	0.46145	0.740643	0.446(0.038-5.174)	0.731036	15.6383	0.970878	0
Sulfonylureas/TZDs	PPARG	Clear cell OC	Weighted median	29	-1.08982	-7.52806	0.639366	0.530639	0.336(0.014-7.912)	0.731036	15.6383	0.970878	0
Sulfonylureas/TZDs	PPARG	Clear cell OC	Weighted mode	29	0.763654	5.27503	1.10145	0.553356	2.146(0.083-55.284)	0.731036	15.6383	0.970878	0
Sulfonylureas/TZDs	PPARG	Mucinous OC	IVW(MRE)	29	-0.177329	-1.22492	0.334861	0.0375043	0.838(0.213-3.298)	0.87057	26.5688	0.541811	0
Sulfonylureas/TZDs	PPARG	Mucinous OC	IVW(FE)	29	-0.177329	-1.22492	0.343762	0.0427271	0.838(0.135-5.18)	0.87057	26.5688	0.541811	0
Sulfonylureas/TZDs	PPARG	Mucinous OC	Weighted median	29	-0.581427	-4.01628	0.492408	0.518712	0.559(0.067-4.701)	0.87057	26.5688	0.541811	0
Sulfonylureas/TZDs	PPARG	Mucinous OC	Weighted mode	29	-0.604536	-4.17591	0.687958	0.803235	0.546(0.045-6.617)	0.87057	26.5688	0.541811	0
Sulfonylureas/TZDs	PPARG	Endometrioid OC	IVW(MRE)	29	0.332053	2.2937	0.307824	0.000504828	1.394(0.427-4.548)	0.981222	24.3508	0.662894	0
Sulfonylureas/TZDs	PPARG	Endometrioid OC	IVW(FE)	29	0.332053	2.2937	0.330084	0.00118023	1.394(0.243-7.99)	0.981222	24.3508	0.662894	0
Sulfonylureas/TZDs	PPARG	Endometrioid OC	Weighted median	29	0.394311	2.72376	0.483214	0.154538	1.483(0.182-12.072)	0.981222	24.3508	0.662894	0
Sulfonylureas/TZDs	PPARG	Endometrioid OC	Weighted mode	29	0.368639	2.54642	0.670274	0.213677	1.446(0.106-19.745)	0.981222	24.3508	0.662894	0
Sulfonylureas/TZDs	PPARG	HGSOC (survival)	IVW(MRE)	28	1.45885	10.0772	0.22784	0.00272695	4.301(0.889-20.809)	0.44224	24.0945	0.625072	0
Sulfonylureas/TZDs	PPARG	HGSOC (survival)	IVW(FE)	28	1.45885	10.0772	0.241187	0.00463873	4.301(0.827-22.371)	0.44224	24.0945	0.625072	0
Sulfonylureas/TZDs	PPARG	HGSOC (survival)	Weighted median	28	1.18089	8.15716	0.35582	0.217052	3.257(0.402-26.418)	0.44224	24.0945	0.625072	0
Sulfonylureas/TZDs	PPARG	HGSOC (survival)	Weighted mode	28	0.976741	6.74696	0.591636	0.849398	2.656(0.208-33.865)	0.44224	24.0945	0.625072	0
Sulfonylureas/TZDs	PPARG	All OC (Histology Unadjusted)	IVW(MRE)	27	0.948024	6.54859	0.20764	0.000441775	2.581(0.618-10.775)	0.753894	26.1458	0.455111	0.0056
Sulfonylureas/TZDs	PPARG	All OC (Histology Unadjusted)	IVW(FE)	27	0.948024	6.54859	0.20706	0.000425689	2.581(0.899-7.41)	0.753894	26.1458	0.455111	0.0056
Sulfonylureas/TZDs	PPARG	All OC (Histology Unadjusted)	Weighted median	27	0.613201	4.23576	0.307857	0.24232	1.846(0.47-7.26)	0.753894	26.1458	0.455111	0.0056
Sulfonylureas/TZDs	PPARG	All OC (Histology Unadjusted)	Weighted mode	27	0.52319	3.614	0.42607	0.969823	1.687(0.43-6.62)	0.753894	26.1458	0.455111	0.0056
Sulfonylureas/TZDs	PPARG	All OC (Histology Adjusted)	IVW(MRE)	28	1.44845	10.0054	0.203688	0.0179605	4.257(0.652-27.779)	0.590386	26.9711	0.465357	0
Sulfonylureas/TZDs	PPARG	All OC (Histology Adjusted)	IVW(FE)	28	1.44845	10.0054	0.203797	0.0180221	4.257(1.044-17.352)	0.590386	26.9711	0.465357	0
Sulfonylureas/TZDs	PPARG	All OC (Histology Adjusted)	Weighted median	28	1.0624	7.33863	0.304535	0.580562	2.893(0.446-18.758)	0.590386	26.9711	0.465357	0
Sulfonylureas/TZDs	PPARG	All OC (Histology Adjusted)	Weighted mode	28	0.836752	5.77997	0.443135	0.790913	2.309(0.217-24.523)	0.590386	26.9711	0.465357	0
Sulfonylureas/TZDs	VEGFA/SLC29A1	All OC	IVW(MRE)	6	-0.0235686	-0.106236	0.238015	0.126975	0.977(0.676-1.411)	0.437243	2.22895	0.816643	0
Sulfonylureas/TZDs	VEGFA/SLC29A1	All OC	IVW(FE)	6	-0.0235686	-0.106236	0.356483	0.308219	0.977(0.609-1.566)	0.437243	2.22895	0.816643	0
Sulfonylureas/TZDs	VEGFA/SLC29A1	All OC	Weighted median	6	-0.215239	-0.970201	0.404954	0.191541	0.806(0.437-1.487)	0.437243	2.22895	0.816643	0
Sulfonylureas/TZDs	VEGFA/SLC29A1	All OC	Weighted mode	6	-0.287827	-1.29739	0.515528	0.267394	0.75(0.356-1.581)	0.437243	2.22895	0.816643	0
Sulfonylureas/TZDs	VEGFA/SLC29A1	HGSOC	IVW(MRE)	6	0.22174	0.999505	0.208004	0.00028318	1.248(0.912-1.708)	0.938779	1.20445	0.94445	0
Sulfonylureas/TZDs	VEGFA/SLC29A1	HGSOC	IVW(FE)	6	0.22174	0.999505	0.423802	0.0747929	1.248(0.712-2.189)	0.938779	1.20445	0.94445	0
Sulfonylureas/TZDs	VEGFA/SLC29A1	HGSOC	Weighted median	6	0.196942	0.887725	0.493597	0.0674162	1.218(0.601-2.469)	0.938779	1.20445	0.94445	0
Sulfonylureas/TZDs	VEGFA/SLC29A1	HGSOC	Weighted mode	6	0.140442	0.633048	0.602712	0.187495	1.151(0.485-2.732)	0.938779	1.20445	0.94445	0
Sulfonylureas/TZDs	VEGFA/SLC29A1	LGSOC	IVW(MRE)	6	-1.45867	-6.57503	1.40233	0.273169	0.233(0.036-1.488)	0.789283	5.85675	0.320409	0.1463
Sulfonylureas/TZDs	VEGFA/SLC29A1	LGSOC	IVW(FE)	6	-1.45867	-6.57503	1.29571	0.235636	0.233(0.042-1.283)	0.789283	5.85675	0.320409	0.1463
Sulfonylureas/TZDs	VEGFA/SLC29A1	LGSOC	Weighted median	6	-1.96423	-8.85386	1.68045	0.902981	0.14(0.013-1.503)	0.789283	5.85675	0.320409	0.1463
Sulfonylureas/TZDs	VEGFA/SLC29A1	LGSOC	Weighted mode	6	-2.30454	-10.3878	1.96212	0.840434	0.1(0.008-1.179)	0.789283	5.85675	0.320409	0.1463
Sulfonylureas/TZDs	VEGFA/SLC29A1	Clear cell OC	IVW(MRE)	6	-0.543789	-2.45116	1.36263	0.642621	0.581(0.116-2.913)	0.319261	7.8896	0.162426	0.3663
Sulfonylureas/TZDs	VEGFA/SLC29A1	Clear cell OC	IVW(FE)	6	-0.543789	-2.45116	1.08477	0.55996	0.581(0.14-2.404)	0.319261	7.8896	0.162426	0.3663
Sulfonylureas/TZDs	VEGFA/SLC29A1	Clear cell OC	Weighted median	6	-0.316863	-1.42828	1.45805	0.512047	0.728(0.102-5.206)	0.319261	7.8896	0.162426	0.3663
Sulfonylureas/TZDs	VEGFA/SLC29A1	Clear cell OC	Weighted mode	6	-0.86836	-3.91417	1.72729	0.757161	0.42(0.044-4.048)	0.319261	7.8896	0.162426	0.3663
Sulfonylureas/TZDs	VEGFA/SLC29A1	Mucinous OC	IVW(MRE)	6	-1.16728	-5.26157	0.569187	0.388868	0.311(0.081-1.202)	0.956613	2.50837	0.775234	0
Sulfonylureas/TZDs	VEGFA/SLC29A1	Mucinous OC	IVW(FE)	6	-1.16728	-5.26157	0.803609	0.541654	0.311(0.105-0.92)	0.956613	2.50837	0.775234	0
Sulfonylureas/TZDs	VEGFA/SLC29A1	Mucinous OC	Weighted median	6	-0.855001	-3.85396	1.00106	0.943845	0.425(0.085-2.138)	0.956613	2.50837	0.775234	0
Sulfonylureas/TZDs	VEGFA/SLC29A1	Mucinous OC	Weighted mode	6	0.395077	1.78083	1.32375	0.792374	1.484(0.088-25.084)	0.956613	2.50837	0.775234	0
Sulfonylureas/TZDs	VEGFA/SLC29A1	Endometrioid OC	IVW(MRE)	6	-0.361736	-1.63054	0.521019	0.398047	0.696(0.298-1.629)	0.491938	2.27732	0.809593	0
Sulfonylureas/TZDs	VEGFA/SLC29A1	Endometrioid OC	IVW(FE)	6	-0.361736	-1.63054	0.772018	0.568439	0.696(0.252-1.924)	0.491938	2.27732	0.809593	0
Sulfonylureas/TZDs	VEGFA/SLC29A1	Endometrioid OC	Weighted median	6	-0.469854	-2.11789	0.981761	0.440478	0.625(0.157-2.492)	0.491938	2.27732	0.809593	0
Sulfonylureas/TZDs	VEGFA/SLC29A1	Endometrioid OC	Weighted mode	6	-0.796233	-3.58906	1.13356	0.417458	0.451(0.067-3.052)	0.491938	2.27732	0.809593	0
Sulfonylureas/TZDs	VEGFA/SLC29A1	HGSOC (survival)	IVW(MRE)	6	0.201427	0.907939	0.243606	2.44e-11	1.223(0.547-2.733)	0.800018	0.99363	0.963078	0
Sulfonylureas/TZDs	VEGFA/SLC29A1	HGSOC (survival)	IVW(FE)	6	0.201427	0.907939	0.546462	0.00291568	1.223(0.59-2.536)	0.800018	0.99363	0.963078	0
Sulfonylureas/TZDs	VEGFA/SLC29A1	HGSOC (survival)	Weighted median	6	0.268314	1.20944	0.681437	0.0293561	1.308(0.477-3.582)	0.800018	0.99363	0.963078	0
Sulfonylureas/TZDs	VEGFA/SLC29A1	HGSOC (survival)	Weighted mode	6	0.244614	1.10261	0.956274	0.0796382	1.277(0.298-5.474)	0.800018	0.99363	0.963078	0
Sulfonylureas/TZDs	VEGFA/SLC29A1	All OC (Histology Unadjusted)	IVW(MRE)	6	-0.244981	-1.10426	0.363166	0.00741601	0.783(0.429-1.427)	0.416027	3.01911	0.69704	0
Sulfonylureas/TZDs	VEGFA/SLC29A1	All OC (Histology Unadjusted)	IVW(FE)	6	-0.244981	-1.10426	0.467359	0.0374682	0.783(0.421-1.454)	0.416027	3.01911	0.69704	0
Sulfonylureas/TZDs	VEGFA/SLC29A1	All OC (Histology Unadjusted)	Weighted median	6	-0.446851	-2.0142	0.595901	0.193373	0.64(0.267-1.534)	0.416027	3.01911	0.69704	0
Sulfonylureas/TZDs	VEGFA/SLC29A1	All OC (Histology Unadjusted)	Weighted mode	6	-0.361274	-1.62846	0.877276	0.496957	0.697(0.178-2.724)	0.416027	3.01911	0.69704	0
Sulfonylureas/TZDs	VEGFA/SLC29A1	All OC (Histology Adjusted)	IVW(MRE)	6	-0.0918173	-0.413871	0.37494	0.000885906	0.912(0.466-1.786)	0.548105	3.20465	0.668468	0
Sulfonylureas/TZDs	VEGFA/SLC29A1	All OC (Histology Adjusted)	IVW(FE)	6	-0.0918173	-0.413871	0.468334	0.00777935	0.912(0.49-1.698)	0.548105	3.20465	0.668468	0
Sulfonylureas/TZDs	VEGFA/SLC29A1	All OC (Histology Adjusted)	Weighted median	6	0.133075	0.599843	0.583091	0.0727196	1.142(0.468-2.789)	0.548105	3.20465	0.668468	0
Sulfonylureas/TZDs	VEGFA/SLC29A1	All OC (Histology Adjusted)	Weighted mode	6	0.440048	1.98354	0.910456	0.344439	1.553(0.389-6.201)	0.548105	3.20465	0.668468	0
Sulfonylureas	INS	All OC	IVW(MRE)	4	0.102144	0.192674	0.369808	0.0047609	1.108(0.802-1.529)	0.30186	2.42994	0.488085	0
Sulfonylureas	INS	All OC	IVW(FE)	4	0.102144	0.192674	0.410902	0.0110703	1.108(0.821-1.493)	0.30186	2.42994	0.488085	0
Sulfonylureas	INS	All OC	Weighted median	4	0.0688656	0.129902	0.514514	0.0601007	1.071(0.686-1.673)	0.30186	2.42994	0.488085	0
Sulfonylureas	INS	All OC	Weighted mode	4	0.0541769	0.102194	0.539601	0.268524	1.056(0.627-1.777)	0.30186	2.42994	0.488085	0
Sulfonylureas	INS	HGSOC	IVW(MRE)	4	-0.000838453	-0.00158158	0.65483	0.0565283	0.999(0.693-1.441)	0.236776	5.38746	0.145527	0.4432
Sulfonylureas	INS	HGSOC	IVW(FE)	4	-0.000838453	-0.00158158	0.488649	0.0106049	0.999(0.7-1.426)	0.236776	5.38746	0.145527	0.4432
Sulfonylureas	INS	HGSOC	Weighted median	4	-0.0373884	-0.0705261	0.632117	0.112571	0.963(0.578-1.606)	0.236776	5.38746	0.145527	0.4432
Sulfonylureas	INS	HGSOC	Weighted mode	4	-0.009548	-0.0180105	0.627796	0.377586	0.99(0.511-1.919)	0.236776	5.38746	0.145527	0.4432
Sulfonylureas	INS	LGSOC	IVW(MRE)	4	-0.624222	-1.17748	0.842751	0.175886	0.536(0.255-1.126)	0.552045	0.958909	0.811193	0
Sulfonylureas	INS	LGSOC	IVW(FE)	4	-0.624222	-1.17748	1.49063	0.44413	0.536(0.182-1.58)	0.552045	0.958909	0.811193	0
Sulfonylureas	INS	LGSOC	Weighted median	4	-0.609468	-1.14964	1.81862	0.681479	0.544(0.122-2.43)	0.552045	0.958909	0.811193	0
Sulfonylureas	INS	LGSOC	Weighted mode	4	-0.588842	-1.11074	1.98962	0.846055	0.555(0.075-4.11)	0.552045	0.958909	0.811193	0
Sulfonylureas	INS	Clear cell OC	IVW(MRE)	4	0.152741	0.288116	1.39023	0.561643	1.165(0.593-2.29)	0.224358	3.70942	0.294599	0.1912
Sulfonylureas	INS	Clear cell OC	IVW(FE)	4	0.152741	0.288116	1.25024	0.518675	1.165(0.472-2.878)	0.224358	3.70942	0.294599	0.1912
Sulfonylureas	INS	Clear cell OC	Weighted median	4	0.400902	0.756225	1.65505	0.51023	1.493(0.412-5.406)	0.224358	3.70942	0.294599	0.1912
Sulfonylureas	INS	Clear cell OC	Weighted mode	4	0.660831	1.24653	1.75269	0.692498	1.936(0.196-19.14)	0.224358	3.70942	0.294599	0.1912
Sulfonylureas	INS	Mucinous OC	IVW(MRE)	4	0.696589	1.31398	0.699335	0.799829	2.007(1.041-3.869)	0.640422	1.69779	0.637426	0
Sulfonylureas	INS	Mucinous OC	IVW(FE)	4	0.696589	1.31398	0.929617	0.848718	2.007(1.023-3.937)	0.640422	1.69779	0.637426	0
Sulfonylureas	INS	Mucinous OC	Weighted median	4	0.317767	0.599406	1.11611	0.602409	1.374(0.521-3.625)	0.640422	1.69779	0.637426	0
Sulfonylureas	INS	Mucinous OC	Weighted mode	4	-0.173048	-0.326422	1.32645	0.679533	0.841(0.199-3.547)	0.640422	1.69779	0.637426	0
Sulfonylureas	INS	Endometrioid OC	IVW(MRE)	4	1.07067	2.01961	0.603345	0.582077	2.917(1.596-5.333)	0.95041	1.37588	0.711198	0
Sulfonylureas	INS	Endometrioid OC	IVW(FE)	4	1.07067	2.01961	0.890915	0.709364	2.917(1.528-5.571)	0.95041	1.37588	0.711198	0
Sulfonylureas	INS	Endometrioid OC	Weighted median	4	0.687944	1.29767	1.04851	0.706865	1.99(0.772-5.131)	0.95041	1.37588	0.711198	0
Sulfonylureas	INS	Endometrioid OC	Weighted mode	4	0.852894	1.60882	1.31202	0.796997	2.346(0.651-8.463)	0.95041	1.37588	0.711198	0
Sulfonylureas	INS	HGSOC (survival)	IVW(MRE)	3	-0.682827	-1.28802	0.804344	0.0697216	0.505(0.323-0.79)	0.883929	1.82823	0.400872	0
Sulfonylureas	INS	HGSOC (survival)	IVW(FE)	3	-0.682827	-1.28802	0.841283	0.0829039	0.505(0.315-0.811)	0.883929	1.82823	0.400872	0
Sulfonylureas	INS	HGSOC (survival)	Weighted median	3	-0.439226	-0.828515	1.08561	0.276697	0.645(0.315-1.318)	0.883929	1.82823	0.400872	0
Sulfonylureas	INS	HGSOC (survival)	Weighted mode	3	-0.113427	-0.213959	1.27219	0.522886	0.893(0.291-2.734)	0.883929	1.82823	0.400872	0
Sulfonylureas	INS	All OC (Histology Unadjusted)	IVW(MRE)	4	-0.729603	-1.37625	0.729172	0.193554	0.482(0.321-0.724)	0.611479	5.5071	0.138215	0.4552
Sulfonylureas	INS	All OC (Histology Unadjusted)	IVW(FE)	4	-0.729603	-1.37625	0.538182	0.0781487	0.482(0.321-0.723)	0.611479	5.5071	0.138215	0.4552
Sulfonylureas	INS	All OC (Histology Unadjusted)	Weighted median	4	-0.359948	-0.678973	0.649524	0.345131	0.698(0.385-1.263)	0.611479	5.5071	0.138215	0.4552
Sulfonylureas	INS	All OC (Histology Unadjusted)	Weighted mode	4	0.0162744	0.0306985	0.685257	0.50072	1.016(0.436-2.37)	0.611479	5.5071	0.138215	0.4552
Sulfonylureas	INS	All OC (Histology Adjusted)	IVW(MRE)	3	-0.482013	-0.909225	0.957055	0.130167	0.618(0.414-0.921)	0.86995	3.56385	0.168313	0.4388
Sulfonylureas	INS	All OC (Histology Adjusted)	IVW(FE)	3	-0.482013	-0.909225	0.716955	0.0433542	0.618(0.414-0.921)	0.86995	3.56385	0.168313	0.4388
Sulfonylureas	INS	All OC (Histology Adjusted)	Weighted median	3	-0.168275	-0.317419	0.945312	0.261073	0.845(0.474-1.508)	0.86995	3.56385	0.168313	0.4388
Sulfonylureas	INS	All OC (Histology Adjusted)	Weighted mode	3	0.118658	0.223825	1.17071	0.548938	1.126(0.475-2.668)	0.86995	3.56385	0.168313	0.4388
TZDs	RXRB	All OC	IVW(MRE)	25	0.363244	1.32582	0.125537	3.63e-07	1.438(0.902-2.293)	0.549799	17.0979	0.844455	0
TZDs	RXRB	All OC	IVW(FE)	25	0.363244	1.32582	0.148732	1.75e-05	1.438(0.715-2.892)	0.549799	17.0979	0.844455	0
TZDs	RXRB	All OC	Weighted median	25	0.528884	1.93041	0.205816	0.00764271	1.697(0.764-3.77)	0.549799	17.0979	0.844455	0
TZDs	RXRB	All OC	Weighted mode	25	0.643217	2.34772	0.294225	0.0665073	1.903(0.698-5.187)	0.549799	17.0979	0.844455	0
TZDs	RXRB	HGSOC	IVW(MRE)	25	0.755101	2.75609	0.190795	3.35e-07	2.128(1.415-3.199)	0.565173	27.9939	0.260299	0.1427
TZDs	RXRB	HGSOC	IVW(FE)	25	0.755101	2.75609	0.176661	3.58e-08	2.128(0.927-4.883)	0.565173	27.9939	0.260299	0.1427
TZDs	RXRB	HGSOC	Weighted median	25	0.902735	3.29495	0.247867	3.58e-05	2.466(0.917-6.635)	0.565173	27.9939	0.260299	0.1427
TZDs	RXRB	HGSOC	Weighted mode	25	0.919833	3.35735	0.318896	0.00267466	2.509(0.734-8.578)	0.565173	27.9939	0.260299	0.1427
TZDs	RXRB	LGSOC	IVW(MRE)	25	-1.53667	-5.60879	0.592546	0.96162	0.215(0.014-3.36)	0.859631	29.5895	0.198731	0.1889
TZDs	RXRB	LGSOC	IVW(FE)	25	-1.53667	-5.60879	0.533653	0.957388	0.215(0.017-2.726)	0.859631	29.5895	0.198731	0.1889
TZDs	RXRB	LGSOC	Weighted median	25	-0.204841	-0.74766	0.745864	0.807444	0.815(0.031-21.304)	0.859631	29.5895	0.198731	0.1889
TZDs	RXRB	LGSOC	Weighted mode	25	0.416086	1.5187	1.13558	0.905545	1.516(0.029-78.314)	0.859631	29.5895	0.198731	0.1889
TZDs	RXRB	Clear cell OC	IVW(MRE)	25	-0.632312	-2.30791	0.41085	0.762976	0.531(0.037-7.679)	0.851854	20.1564	0.687847	0
TZDs	RXRB	Clear cell OC	IVW(FE)	25	-0.632312	-2.30791	0.448313	0.782261	0.531(0.063-4.454)	0.851854	20.1564	0.687847	0
TZDs	RXRB	Clear cell OC	Weighted median	25	-0.955979	-3.48928	0.619124	0.892993	0.384(0.022-6.61)	0.851854	20.1564	0.687847	0
TZDs	RXRB	Clear cell OC	Weighted mode	25	-0.564223	-2.05939	0.831709	0.722709	0.569(0.016-20.232)	0.851854	20.1564	0.687847	0
TZDs	RXRB	Mucinous OC	IVW(MRE)	25	0.490453	1.79013	0.370175	0.119097	1.633(0.535-4.983)	0.13417	29.0233	0.219254	0.1731
TZDs	RXRB	Mucinous OC	IVW(FE)	25	0.490453	1.79013	0.33662	0.08654	1.633(0.338-7.889)	0.13417	29.0233	0.219254	0.1731
TZDs	RXRB	Mucinous OC	Weighted median	25	-0.0705132	-0.25737	0.50312	0.669825	0.932(0.138-6.284)	0.13417	29.0233	0.219254	0.1731
TZDs	RXRB	Mucinous OC	Weighted mode	25	-0.367578	-1.34165	0.73102	0.703615	0.692(0.046-10.424)	0.13417	29.0233	0.219254	0.1731
TZDs	RXRB	Endometrioid OC	IVW(MRE)	25	0.440321	1.60716	0.315058	0.566389	1.553(0.559-4.313)	0.339281	22.8425	0.52911	0
TZDs	RXRB	Endometrioid OC	IVW(FE)	25	0.440321	1.60716	0.322942	0.575903	1.553(0.342-7.053)	0.339281	22.8425	0.52911	0
TZDs	RXRB	Endometrioid OC	Weighted median	25	0.757318	2.76418	0.450742	0.97672	2.133(0.355-12.796)	0.339281	22.8425	0.52911	0
TZDs	RXRB	Endometrioid OC	Weighted mode	25	1.00141	3.65509	0.605549	0.798786	2.722(0.247-30.026)	0.339281	22.8425	0.52911	0
TZDs	RXRB	HGSOC (survival)	IVW(MRE)	23	-1.62654	-5.9368	0.139512	2.94e-23	0.197(0.122-0.317)	0.9356	7.7312	0.997803	0
TZDs	RXRB	HGSOC (survival)	IVW(FE)	23	-1.62654	-5.9368	0.235341	3.88e-09	0.197(0.067-0.574)	0.9356	7.7312	0.997803	0
TZDs	RXRB	HGSOC (survival)	Weighted median	23	-1.48463	-5.41883	0.307755	1.49e-05	0.227(0.063-0.82)	0.9356	7.7312	0.997803	0
TZDs	RXRB	HGSOC (survival)	Weighted mode	23	-2.0986	-7.6598	0.43269	0.00515382	0.123(0.022-0.685)	0.9356	7.7312	0.997803	0
TZDs	RXRB	All OC (Histology Unadjusted)	IVW(MRE)	24	-0.972399	-3.54922	0.1176	0.000119197	0.378(0.186-0.771)	0.493195	8.05265	0.998285	0
TZDs	RXRB	All OC (Histology Unadjusted)	IVW(FE)	24	-0.972399	-3.54922	0.198747	0.0228014	0.378(0.151-0.945)	0.493195	8.05265	0.998285	0
TZDs	RXRB	All OC (Histology Unadjusted)	Weighted median	24	-0.775067	-2.82897	0.26215	0.10879	0.461(0.148-1.437)	0.493195	8.05265	0.998285	0
TZDs	RXRB	All OC (Histology Unadjusted)	Weighted mode	24	-0.642267	-2.34425	0.35204	0.566657	0.526(0.095-2.921)	0.493195	8.05265	0.998285	0
TZDs	RXRB	All OC (Histology Adjusted)	IVW(MRE)	23	-1.24647	-4.54957	0.14168	3.36e-08	0.288(0.138-0.6)	0.652651	10.9276	0.975767	0
TZDs	RXRB	All OC (Histology Adjusted)	IVW(FE)	23	-1.24647	-4.54957	0.201028	9.97e-05	0.288(0.115-0.72)	0.652651	10.9276	0.975767	0
TZDs	RXRB	All OC (Histology Adjusted)	Weighted median	23	-1.04641	-3.81934	0.269735	0.0163449	0.351(0.11-1.124)	0.652651	10.9276	0.975767	0
TZDs	RXRB	All OC (Histology Adjusted)	Weighted mode	23	-0.950234	-3.46832	0.373633	0.165021	0.387(0.064-2.336)	0.652651	10.9276	0.975767	0
Insulin	LRP2	All OC	IVW(MRE)	11	-0.638657	-0.499918	0.187581	0.900013	0.528(0.413-0.675)	0.655845	6.05866	0.810311	0
Insulin	LRP2	All OC	IVW(FE)	11	-0.638657	-0.499918	0.24099	0.922092	0.528(0.394-0.707)	0.655845	6.05866	0.810311	0
Insulin	LRP2	All OC	Weighted median	11	-0.549005	-0.429742	0.304735	0.479991	0.578(0.382-0.873)	0.655845	6.05866	0.810311	0
Insulin	LRP2	All OC	Weighted mode	11	-0.565608	-0.442738	0.389442	0.476852	0.568(0.321-1.006)	0.655845	6.05866	0.810311	0
Insulin	LRP2	HGSOC	IVW(MRE)	11	-0.973503	-0.762024	0.15986	0.165414	0.378(0.26-0.549)	0.922169	3.11258	0.978649	0
Insulin	LRP2	HGSOC	IVW(FE)	11	-0.973503	-0.762024	0.286536	0.43901	0.378(0.267-0.534)	0.922169	3.11258	0.978649	0
Insulin	LRP2	HGSOC	Weighted median	11	-1.02439	-0.801858	0.353367	0.577302	0.359(0.223-0.579)	0.922169	3.11258	0.978649	0
Insulin	LRP2	HGSOC	Weighted mode	11	-1.06785	-0.835873	0.452725	0.762766	0.344(0.173-0.682)	0.922169	3.11258	0.978649	0
Insulin	LRP2	LGSOC	IVW(MRE)	11	0.0285138	0.0223196	0.94716	0.123548	1.029(0.322-3.287)	0.926533	11.8109	0.29791	0.1533
Insulin	LRP2	LGSOC	IVW(FE)	11	0.0285138	0.0223196	0.871528	0.0941904	1.029(0.362-2.928)	0.926533	11.8109	0.29791	0.1533
Insulin	LRP2	LGSOC	Weighted median	11	-0.181785	-0.142295	1.17011	0.0932154	0.834(0.184-3.774)	0.926533	11.8109	0.29791	0.1533
Insulin	LRP2	LGSOC	Weighted mode	11	-0.136178	-0.106596	1.42268	0.136331	0.873(0.094-8.14)	0.926533	11.8109	0.29791	0.1533
Insulin	LRP2	Clear cell OC	IVW(MRE)	11	0.123902	0.0969862	0.822903	0.508729	1.132(0.506-2.532)	0.72554	12.8848	0.230185	0.2239
Insulin	LRP2	Clear cell OC	IVW(FE)	11	0.123902	0.0969862	0.724953	0.453193	1.132(0.47-2.725)	0.72554	12.8848	0.230185	0.2239
Insulin	LRP2	Clear cell OC	Weighted median	11	-0.0832835	-0.0651914	0.998624	0.751016	0.92(0.264-3.21)	0.72554	12.8848	0.230185	0.2239
Insulin	LRP2	Clear cell OC	Weighted mode	11	-0.298612	-0.233743	1.18315	0.47984	0.742(0.112-4.918)	0.72554	12.8848	0.230185	0.2239
Insulin	LRP2	Mucinous OC	IVW(MRE)	11	-0.576946	-0.451613	0.6893	0.0903738	0.562(0.272-1.16)	0.580579	15.5231	0.114123	0.3558
Insulin	LRP2	Mucinous OC	IVW(FE)	11	-0.576946	-0.451613	0.553247	0.0348694	0.562(0.29-1.086)	0.580579	15.5231	0.114123	0.3558
Insulin	LRP2	Mucinous OC	Weighted median	11	-0.214524	-0.167922	0.809055	0.290608	0.807(0.311-2.091)	0.580579	15.5231	0.114123	0.3558
Insulin	LRP2	Mucinous OC	Weighted mode	11	0.281456	0.220314	1.35573	0.776692	1.325(0.29-6.06)	0.580579	15.5231	0.114123	0.3558
Insulin	LRP2	Endometrioid OC	IVW(MRE)	11	-0.180647	-0.141404	0.433565	0.404096	0.835(0.45-1.548)	0.909292	6.99348	0.72606	0
Insulin	LRP2	Endometrioid OC	IVW(FE)	11	-0.180647	-0.141404	0.518451	0.48535	0.835(0.443-1.572)	0.909292	6.99348	0.72606	0
Insulin	LRP2	Endometrioid OC	Weighted median	11	-0.0131535	-0.0102961	0.683736	0.491965	0.987(0.404-2.412)	0.909292	6.99348	0.72606	0
Insulin	LRP2	Endometrioid OC	Weighted mode	11	0.156089	0.122181	0.993024	0.441291	1.169(0.351-3.898)	0.909292	6.99348	0.72606	0
Insulin	LRP2	HGSOC (survival)	IVW(MRE)	11	1.38601	1.08492	0.410254	0.62344	3.999(3.042-5.256)	0.704404	12.1584	0.274597	0.1775
Insulin	LRP2	HGSOC (survival)	IVW(FE)	11	1.38601	1.08492	0.372061	0.588246	3.999(2.521-6.343)	0.704404	12.1584	0.274597	0.1775
Insulin	LRP2	HGSOC (survival)	Weighted median	11	1.33247	1.04301	0.529322	0.612224	3.79(2.106-6.823)	0.704404	12.1584	0.274597	0.1775
Insulin	LRP2	HGSOC (survival)	Weighted mode	11	1.34388	1.05194	0.77378	0.758404	3.834(1.663-8.841)	0.704404	12.1584	0.274597	0.1775
Insulin	LRP2	All OC (Histology Unadjusted)	IVW(MRE)	11	0.452496	0.354198	0.306454	0.424055	1.572(1.249-1.98)	0.623292	9.39719	0.494868	0
Insulin	LRP2	All OC (Histology Unadjusted)	IVW(FE)	11	0.452496	0.354198	0.31613	0.438377	1.572(1.065-2.321)	0.623292	9.39719	0.494868	0
Insulin	LRP2	All OC (Histology Unadjusted)	Weighted median	11	0.420399	0.329074	0.417722	0.28474	1.523(0.907-2.557)	0.623292	9.39719	0.494868	0
Insulin	LRP2	All OC (Histology Unadjusted)	Weighted mode	11	0.20466	0.160201	0.690912	0.612436	1.227(0.584-2.577)	0.623292	9.39719	0.494868	0
Insulin	LRP2	All OC (Histology Adjusted)	IVW(MRE)	11	0.782287	0.612347	0.342851	0.788849	2.186(1.656-2.886)	0.80569	11.6947	0.306011	0.1449
Insulin	LRP2	All OC (Histology Adjusted)	IVW(FE)	11	0.782287	0.612347	0.317038	0.772115	2.186(1.474-3.242)	0.80569	11.6947	0.306011	0.1449
Insulin	LRP2	All OC (Histology Adjusted)	Weighted median	11	0.647667	0.506971	0.442677	0.763708	1.911(1.126-3.243)	0.80569	11.6947	0.306011	0.1449
Insulin	LRP2	All OC (Histology Adjusted)	Weighted mode	11	0.536603	0.420034	0.716852	0.553014	1.71(0.871-3.359)	0.80569	11.6947	0.306011	0.1449
Biguanides	SLC47A1	All OC	Wald ratio	1	0.993823	12.68	1.06116	0.348994	2.702(0.338-21.622)	NA	NA	NA	NA
Biguanides	SLC47A1	HGSOC	Wald ratio	1	0.082122	1.04778	1.2624	0.948133	1.086(0.091-12.89)	NA	NA	NA	NA
Biguanides	SLC47A1	LGSOC	Wald ratio	1	-3.05423	-38.9682	3.83133	0.425351	0.047(0-86.071)	NA	NA	NA	NA
Biguanides	SLC47A1	Clear cell OC	Wald ratio	1	3.64402	46.4933	3.20361	0.255341	38.245(0.072-20396.014)	NA	NA	NA	NA
Biguanides	SLC47A1	Mucinous OC	Wald ratio	1	-2.18424	-27.8683	2.41567	0.365891	0.113(0.001-12.813)	NA	NA	NA	NA
Biguanides	SLC47A1	Endometrioid OC	Wald ratio	1	4.72376	60.2694	2.29648	0.0396901	112.59(1.249-10146.141)	NA	NA	NA	NA
Biguanides	SLC47A1	HGSOC (survival)	Wald ratio	1	-0.800322	-10.2111	1.64941	0.627522	0.449(0.018-11.387)	NA	NA	NA	NA
Biguanides	SLC47A1	All OC (Histology Unadjusted)	Wald ratio	1	-0.901717	-11.5048	1.3994	0.519343	0.406(0.026-6.304)	NA	NA	NA	NA
Biguanides	SLC47A1	All OC (Histology Adjusted)	Wald ratio	1	-0.369588	-4.71549	1.40172	0.792037	0.691(0.044-10.781)	NA	NA	NA	NA
AGI	GANC	All OC	Wald ratio	1	1.3742	2.64314	0.939653	0.143617	3.952(0.627-24.926)	NA	NA	NA	NA
AGI	GANC	HGSOC	Wald ratio	1	1.61662	3.10942	1.1171	0.147854	5.036(0.564-44.977)	NA	NA	NA	NA
AGI	GANC	LGSOC	Wald ratio	1	-2.19229	-4.21666	3.40231	0.519346	0.112(0-87.904)	NA	NA	NA	NA
AGI	GANC	Clear cell OC	Wald ratio	1	4.04784	7.78564	2.84481	0.154769	57.274(0.217-15118.34)	NA	NA	NA	NA
AGI	GANC	Mucinous OC	Wald ratio	1	-3.70202	-7.12048	2.13919	0.0835288	0.025(0-1.634)	NA	NA	NA	NA
AGI	GANC	Endometrioid OC	Wald ratio	1	2.58422	4.9705	2.0337	0.203836	13.253(0.246-713.566)	NA	NA	NA	NA
AGI	GANC	HGSOC (survival)	Wald ratio	1	-0.0245777	-0.0472728	1.44895	0.986467	0.976(0.057-16.699)	NA	NA	NA	NA
AGI	GANC	All OC (Histology Unadjusted)	Wald ratio	1	1.05982	2.03846	1.23587	0.391143	2.886(0.256-32.529)	NA	NA	NA	NA
AGI	GANC	All OC (Histology Adjusted)	Wald ratio	1	0.891447	1.71461	1.24425	0.473713	2.439(0.213-27.944)	NA	NA	NA	NA
DPP4i	HMGCR	All OC	IVW(MRE)	2	0.923948	21.9475	1.07184	0.388675	2.519(0.308-20.589)	NA	1.7737	0.182925	0.4362
DPP4i	HMGCR	All OC	IVW(FE)	2	0.923948	21.9475	0.804802	0.25095	2.519(0.52-12.199)	NA	1.7737	0.182925	0.4362
DPP4i	HMGCR	HGSOC	IVW(MRE)	2	-0.397879	-9.45125	1.73684	0.818805	0.672(0.022-20.213)	NA	3.26154	0.0709225	0.6934
DPP4i	HMGCR	HGSOC	IVW(FE)	2	-0.397879	-9.45125	0.961719	0.679082	0.672(0.102-4.424)	NA	3.26154	0.0709225	0.6934
DPP4i	HMGCR	LGSOC	IVW(MRE)	2	3.92476	93.2291	4.48706	0.381746	50.641(0.008-334167.542)	NA	2.40737	0.120765	0.5846
DPP4i	HMGCR	LGSOC	IVW(FE)	2	3.92476	93.2291	2.89195	0.174739	50.641(0.175-14661.413)	NA	2.40737	0.120765	0.5846
DPP4i	HMGCR	Clear cell OC	IVW(MRE)	2	5.49706	130.578	1.64475	0.000831214	243.974(9.712-6128.907)	NA	0.464603	0.49548	0
DPP4i	HMGCR	Clear cell OC	IVW(FE)	2	5.49706	130.578	2.41301	0.022721	243.974(2.155-27627.246)	NA	0.464603	0.49548	0
DPP4i	HMGCR	Mucinous OC	IVW(MRE)	2	-0.84583	-20.0919	1.26592	0.504035	0.429(0.036-5.131)	NA	0.477074	0.489751	0
DPP4i	HMGCR	Mucinous OC	IVW(FE)	2	-0.84583	-20.0919	1.83279	0.644441	0.429(0.012-15.587)	NA	0.477074	0.489751	0
DPP4i	HMGCR	Endometrioid OC	IVW(MRE)	2	3.69064	87.6678	1.12488	0.00103469	40.07(4.419-363.364)	NA	0.420592	0.516642	0
DPP4i	HMGCR	Endometrioid OC	IVW(FE)	2	3.69064	87.6678	1.73451	0.0333556	40.07(1.338-1200.233)	NA	0.420592	0.516642	0
DPP4i	HMGCR	HGSOC (survival)	IVW(MRE)	2	-0.614086	-14.5871	0.701555	0.381399	0.541(0.137-2.14)	NA	0.316216	0.573891	0
DPP4i	HMGCR	HGSOC (survival)	IVW(FE)	2	-0.614086	-14.5871	1.24758	0.622563	0.541(0.047-6.241)	NA	0.316216	0.573891	0
DPP4i	HMGCR	All OC (Histology Unadjusted)	IVW(MRE)	2	-0.671568	-15.9525	0.0934935	6.82e-13	0.511(0.425-0.614)	NA	0.00786421	0.929336	0
DPP4i	HMGCR	All OC (Histology Unadjusted)	IVW(FE)	2	-0.671568	-15.9525	1.05428	0.524128	0.511(0.065-4.034)	NA	0.00786421	0.929336	0
DPP4i	HMGCR	All OC (Histology Adjusted)	IVW(MRE)	2	-0.410733	-9.7566	0.0540395	2.95e-14	0.663(0.597-0.737)	NA	0.00260145	0.959322	0
DPP4i	HMGCR	All OC (Histology Adjusted)	IVW(FE)	2	-0.410733	-9.7566	1.05951	0.698264	0.663(0.083-5.29)	NA	0.00260145	0.959322	0
DPP4i	ITGAL	All OC	IVW(MRE)	7	-0.188908	-0.584559	0.104626	0.0709881	0.828(0.674-1.016)	0.975309	0.799013	0.9921	0
DPP4i	ITGAL	All OC	IVW(FE)	7	-0.188908	-0.584559	0.286708	0.509968	0.828(0.472-1.452)	0.975309	0.799013	0.9921	0
DPP4i	ITGAL	All OC	Weighted median	7	-0.121213	-0.375082	0.328727	0.712325	0.886(0.461-1.702)	0.975309	0.799013	0.9921	0
DPP4i	ITGAL	All OC	Weighted mode	7	-0.0692625	-0.214326	0.453228	0.88355	0.933(0.381-2.287)	0.975309	0.799013	0.9921	0
DPP4i	ITGAL	HGSOC	IVW(MRE)	7	0.462403	1.43086	0.23933	0.0533505	1.588(0.993-2.538)	0.249163	2.94946	0.815163	0
DPP4i	ITGAL	HGSOC	IVW(FE)	7	0.462403	1.43086	0.341351	0.175537	1.588(0.813-3.1)	0.249163	2.94946	0.815163	0
DPP4i	ITGAL	HGSOC	Weighted median	7	0.280551	0.868138	0.409122	0.492877	1.324(0.581-3.014)	0.249163	2.94946	0.815163	0
DPP4i	ITGAL	HGSOC	Weighted mode	7	0.3023	0.935438	0.513273	0.57737	1.353(0.524-3.496)	0.249163	2.94946	0.815163	0
DPP4i	ITGAL	LGSOC	IVW(MRE)	7	0.512418	1.58563	0.558481	0.35887	1.669(0.559-4.988)	0.430229	1.70984	0.944359	0
DPP4i	ITGAL	LGSOC	IVW(FE)	7	0.512418	1.58563	1.04618	0.624276	1.669(0.215-12.974)	0.430229	1.70984	0.944359	0
DPP4i	ITGAL	LGSOC	Weighted median	7	0.872693	2.70047	1.26418	0.489992	2.393(0.191-29.956)	0.430229	1.70984	0.944359	0
DPP4i	ITGAL	LGSOC	Weighted mode	7	1.13351	3.50755	1.63457	0.513956	3.107(0.138-69.902)	0.430229	1.70984	0.944359	0
DPP4i	ITGAL	Clear cell OC	IVW(MRE)	7	0.217592	0.673317	0.718518	0.762016	1.243(0.304-5.083)	0.201976	4.08703	0.6649	0
DPP4i	ITGAL	Clear cell OC	IVW(FE)	7	0.217592	0.673317	0.870581	0.802635	1.243(0.226-6.848)	0.201976	4.08703	0.6649	0
DPP4i	ITGAL	Clear cell OC	Weighted median	7	0.409931	1.26849	1.12506	0.715586	1.507(0.173-13.135)	0.201976	4.08703	0.6649	0
DPP4i	ITGAL	Clear cell OC	Weighted mode	7	0.581133	1.79826	1.36434	0.685004	1.788(0.134-23.879)	0.201976	4.08703	0.6649	0
DPP4i	ITGAL	Mucinous OC	IVW(MRE)	7	-2.10162	-6.50327	0.29049	4.66e-13	0.122(0.069-0.216)	0.599803	1.21889	0.975942	0
DPP4i	ITGAL	Mucinous OC	IVW(FE)	7	-2.10162	-6.50327	0.644504	0.00111086	0.122(0.035-0.432)	0.599803	1.21889	0.975942	0
DPP4i	ITGAL	Mucinous OC	Weighted median	7	-1.81394	-5.61308	0.807619	0.0247015	0.163(0.033-0.801)	0.599803	1.21889	0.975942	0
DPP4i	ITGAL	Mucinous OC	Weighted mode	7	-1.60864	-4.97779	1.10792	0.196722	0.2(0.026-1.566)	0.599803	1.21889	0.975942	0
DPP4i	ITGAL	Endometrioid OC	IVW(MRE)	7	-3.91645	-12.1191	0.287979	4.02e-42	0.02(0.011-0.035)	0.678234	1.32464	0.970282	0
DPP4i	ITGAL	Endometrioid OC	IVW(FE)	7	-3.91645	-12.1191	0.612897	1.66e-10	0.02(0.006-0.066)	0.678234	1.32464	0.970282	0
DPP4i	ITGAL	Endometrioid OC	Weighted median	7	-3.74945	-11.6023	0.759741	8.01e-07	0.024(0.005-0.104)	0.678234	1.32464	0.970282	0
DPP4i	ITGAL	Endometrioid OC	Weighted mode	7	-3.48107	-10.7719	1.07253	0.0175617	0.031(0.004-0.249)	0.678234	1.32464	0.970282	0
DPP4i	ITGAL	HGSOC (survival)	IVW(MRE)	6	-0.305477	-0.94527	0.322105	0.342937	0.737(0.392-1.385)	0.266239	2.19431	0.821658	0
DPP4i	ITGAL	HGSOC (survival)	IVW(FE)	6	-0.305477	-0.94527	0.48622	0.529828	0.737(0.284-1.911)	0.266239	2.19431	0.821658	0
DPP4i	ITGAL	HGSOC (survival)	Weighted median	6	-0.399654	-1.23669	0.609428	0.511962	0.671(0.213-2.109)	0.266239	2.19431	0.821658	0
DPP4i	ITGAL	HGSOC (survival)	Weighted mode	6	-0.526682	-1.62977	0.800816	0.53981	0.591(0.129-2.706)	0.266239	2.19431	0.821658	0
DPP4i	ITGAL	All OC (Histology Unadjusted)	IVW(MRE)	6	0.194943	0.603233	0.386941	0.614398	1.215(0.569-2.594)	0.242079	4.42338	0.4902	0
DPP4i	ITGAL	All OC (Histology Unadjusted)	IVW(FE)	6	0.194943	0.603233	0.411389	0.635596	1.215(0.543-2.722)	0.242079	4.42338	0.4902	0
DPP4i	ITGAL	All OC (Histology Unadjusted)	Weighted median	6	0.12067	0.373402	0.511355	0.813448	1.128(0.407-3.129)	0.242079	4.42338	0.4902	0
DPP4i	ITGAL	All OC (Histology Unadjusted)	Weighted mode	6	0.113364	0.350795	0.573836	0.851173	1.12(0.343-3.653)	0.242079	4.42338	0.4902	0
DPP4i	ITGAL	All OC (Histology Adjusted)	IVW(MRE)	6	-0.0752236	-0.232772	0.322968	0.815829	0.928(0.493-1.747)	0.356391	3.04691	0.692754	0
DPP4i	ITGAL	All OC (Histology Adjusted)	IVW(FE)	6	-0.0752236	-0.232772	0.413728	0.855725	0.928(0.412-2.087)	0.356391	3.04691	0.692754	0
DPP4i	ITGAL	All OC (Histology Adjusted)	Weighted median	6	0.00758638	0.0234753	0.515109	0.988249	1.008(0.372-2.726)	0.356391	3.04691	0.692754	0
DPP4i	ITGAL	All OC (Histology Adjusted)	Weighted mode	6	0.0208665	0.0645693	0.621691	0.974523	1.021(0.259-4.02)	0.356391	3.04691	0.692754	0
GLP-1RA	GLP1R	All OC	IVW(MRE)	4	1.01633	1.56457	0.65425	0.120322	2.763(0.766-9.961)	0.565156	4.06807	0.254207	0.2625
GLP-1RA	GLP1R	All OC	IVW(FE)	4	1.01633	1.56457	0.561837	0.0704612	2.763(0.919-8.311)	0.565156	4.06807	0.254207	0.2625
GLP-1RA	GLP1R	All OC	Weighted median	4	0.954663	1.46964	0.677035	0.15852	2.598(0.704-9.585)	0.565156	4.06807	0.254207	0.2625
GLP-1RA	GLP1R	All OC	Weighted mode	4	0.549441	0.845828	1.05278	0.637827	1.732(0.174-17.245)	0.565156	4.06807	0.254207	0.2625
GLP-1RA	GLP1R	HGSOC	IVW(MRE)	4	1.48948	2.29296	0.675838	0.027531	4.435(1.179-16.679)	0.828144	3.04764	0.384338	0.0156
GLP-1RA	GLP1R	HGSOC	IVW(FE)	4	1.48948	2.29296	0.670534	0.0263282	4.435(1.192-16.506)	0.828144	3.04764	0.384338	0.0156
GLP-1RA	GLP1R	HGSOC	Weighted median	4	1.16414	1.79212	0.829594	0.160537	3.203(0.654-15.684)	0.828144	3.04764	0.384338	0.0156
GLP-1RA	GLP1R	HGSOC	Weighted mode	4	0.965983	1.48707	1.19604	0.478391	2.627(0.274-25.213)	0.828144	3.04764	0.384338	0.0156
GLP-1RA	GLP1R	LGSOC	IVW(MRE)	4	0.414255	0.637718	1.30986	0.751807	1.513(0.116-19.719)	0.416674	1.2676	0.73684	0
GLP-1RA	GLP1R	LGSOC	IVW(FE)	4	0.414255	0.637718	2.01509	0.837122	1.513(0.029-78.558)	0.416674	1.2676	0.73684	0
GLP-1RA	GLP1R	LGSOC	Weighted median	4	-0.497365	-0.76566	2.30591	0.829229	0.608(0.007-52.661)	0.416674	1.2676	0.73684	0
GLP-1RA	GLP1R	LGSOC	Weighted mode	4	-1.09041	-1.67861	3.23395	0.758196	0.336(0.001-196.658)	0.416674	1.2676	0.73684	0
GLP-1RA	GLP1R	Clear cell OC	IVW(MRE)	4	0.661338	1.01808	2.24032	0.767843	1.937(0.024-156.392)	0.563995	5.34966	0.147913	0.4392
GLP-1RA	GLP1R	Clear cell OC	IVW(FE)	4	0.661338	1.01808	1.67768	0.693434	1.937(0.072-51.914)	0.563995	5.34966	0.147913	0.4392
GLP-1RA	GLP1R	Clear cell OC	Weighted median	4	0.274411	0.422437	2.15733	0.898783	1.316(0.021-82.998)	0.563995	5.34966	0.147913	0.4392
GLP-1RA	GLP1R	Clear cell OC	Weighted mode	4	-0.123813	-0.190602	3.2604	0.972093	0.884(0.002-419.31)	0.563995	5.34966	0.147913	0.4392
GLP-1RA	GLP1R	Mucinous OC	IVW(MRE)	4	0.724026	1.11459	0.469075	0.122704	2.063(0.823-5.173)	0.953734	0.409437	0.938286	0
GLP-1RA	GLP1R	Mucinous OC	IVW(FE)	4	0.724026	1.11459	1.26972	0.568526	2.063(0.171-24.846)	0.953734	0.409437	0.938286	0
GLP-1RA	GLP1R	Mucinous OC	Weighted median	4	0.795829	1.22513	1.44109	0.580783	2.216(0.135-36.475)	0.953734	0.409437	0.938286	0
GLP-1RA	GLP1R	Mucinous OC	Weighted mode	4	0.0174515	0.0268655	1.93227	0.993361	1.018(0.017-60.92)	0.953734	0.409437	0.938286	0
GLP-1RA	GLP1R	Endometrioid OC	IVW(MRE)	4	0.265658	0.408963	0.507048	0.600326	1.304(0.483-3.524)	0.601145	0.527945	0.91271	0
GLP-1RA	GLP1R	Endometrioid OC	IVW(FE)	4	0.265658	0.408963	1.20869	0.826035	1.304(0.122-13.939)	0.601145	0.527945	0.91271	0
GLP-1RA	GLP1R	Endometrioid OC	Weighted median	4	0.245667	0.378188	1.37326	0.858021	1.278(0.086-18.969)	0.601145	0.527945	0.91271	0
GLP-1RA	GLP1R	Endometrioid OC	Weighted mode	4	0.998145	1.53658	1.89942	0.635602	2.713(0.064-114.567)	0.601145	0.527945	0.91271	0
GLP-1RA	GLP1R	HGSOC (survival)	IVW(MRE)	3	1.19876	1.8454	0.0710323	6.73e-64	3.316(2.885-3.811)	0.966048	0.00949247	0.995265	0
GLP-1RA	GLP1R	HGSOC (survival)	IVW(FE)	3	1.19876	1.8454	1.03105	0.244971	3.316(0.44-25.019)	0.966048	0.00949247	0.995265	0
GLP-1RA	GLP1R	HGSOC (survival)	Weighted median	3	1.19352	1.83734	1.20945	0.323729	3.299(0.309-35.228)	0.966048	0.00949247	0.995265	0
GLP-1RA	GLP1R	HGSOC (survival)	Weighted mode	3	1.1768	1.81161	1.41574	0.49328	3.244(0.178-59.271)	0.966048	0.00949247	0.995265	0
GLP-1RA	GLP1R	All OC (Histology Unadjusted)	IVW(MRE)	2	0.523796	0.806349	1.11911	0.639751	1.688(0.188-15.139)	NA	1.11352	0.291317	0.1019
GLP-1RA	GLP1R	All OC (Histology Unadjusted)	IVW(FE)	2	0.523796	0.806349	1.06053	0.621376	1.688(0.211-13.497)	NA	1.11352	0.291317	0.1019
GLP-1RA	GLP1R	All OC (Histology Adjusted)	IVW(MRE)	2	0.575989	0.886697	1.18774	0.627714	1.779(0.173-18.246)	NA	1.23795	0.265867	0.1922
GLP-1RA	GLP1R	All OC (Histology Adjusted)	IVW(FE)	2	0.575989	0.886697	1.0675	0.589495	1.779(0.22-14.415)	NA	1.23795	0.265867	0.1922
SGLT2i	SLC5A2	All OC	IVW(MRE)	12	0.587503	2.59215	0.199109	0.00317099	1.799(1.218-2.658)	0.362317	5.84232	0.883675	0
SGLT2i	SLC5A2	All OC	IVW(FE)	12	0.587503	2.59215	0.273209	0.0315253	1.799(1.053-3.074)	0.362317	5.84232	0.883675	0
SGLT2i	SLC5A2	All OC	Weighted median	12	0.77888	3.43654	0.353087	0.0273898	2.179(1.111-4.275)	0.362317	5.84232	0.883675	0
SGLT2i	SLC5A2	All OC	Weighted mode	12	0.86032	3.79586	0.456807	0.0863491	2.364(0.906-6.168)	0.362317	5.84232	0.883675	0
SGLT2i	SLC5A2	HGSOC	IVW(MRE)	12	1.24526	5.49427	0.247657	4.95e-07	3.474(2.138-5.644)	0.378461	6.38699	0.846336	0
SGLT2i	SLC5A2	HGSOC	IVW(FE)	12	1.24526	5.49427	0.325011	0.000127399	3.474(1.837-6.568)	0.378461	6.38699	0.846336	0
SGLT2i	SLC5A2	HGSOC	Weighted median	12	1.2989	5.73093	0.443059	0.00337158	3.665(1.554-8.643)	0.378461	6.38699	0.846336	0
SGLT2i	SLC5A2	HGSOC	Weighted mode	12	1.38847	6.12614	0.562206	0.0311388	4.009(1.389-11.571)	0.378461	6.38699	0.846336	0
SGLT2i	SLC5A2	LGSOC	IVW(MRE)	12	-1.33704	-5.89921	1.00545	0.183586	0.263(0.037-1.884)	0.715141	11.6601	0.38973	0.0566
SGLT2i	SLC5A2	LGSOC	IVW(FE)	12	-1.33704	-5.89921	0.976574	0.170965	0.263(0.039-1.781)	0.715141	11.6601	0.38973	0.0566
SGLT2i	SLC5A2	LGSOC	Weighted median	12	-1.12765	-4.97535	1.41784	0.426424	0.324(0.022-4.699)	0.715141	11.6601	0.38973	0.0566
SGLT2i	SLC5A2	LGSOC	Weighted mode	12	-3.82308	-16.868	2.19949	0.110055	0.022(0-1.782)	0.715141	11.6601	0.38973	0.0566
SGLT2i	SLC5A2	Clear cell OC	IVW(MRE)	12	-0.0359072	-0.158428	0.624016	0.954113	0.965(0.284-3.278)	0.49636	6.28582	0.853629	0
SGLT2i	SLC5A2	Clear cell OC	IVW(FE)	12	-0.0359072	-0.158428	0.825489	0.965304	0.965(0.191-4.865)	0.49636	6.28582	0.853629	0
SGLT2i	SLC5A2	Clear cell OC	Weighted median	12	0.0461087	0.203438	1.11056	0.966882	1.047(0.118-9.26)	0.49636	6.28582	0.853629	0
SGLT2i	SLC5A2	Clear cell OC	Weighted mode	12	0.683996	3.01789	1.49898	0.657047	1.982(0.116-33.938)	0.49636	6.28582	0.853629	0
SGLT2i	SLC5A2	Mucinous OC	IVW(MRE)	12	-0.741573	-3.27193	0.922486	0.421464	0.476(0.078-2.905)	0.256617	24.3356	0.0113902	0.548
SGLT2i	SLC5A2	Mucinous OC	IVW(FE)	12	-0.741573	-3.27193	0.620205	0.231818	0.476(0.141-1.606)	0.256617	24.3356	0.0113902	0.548
SGLT2i	SLC5A2	Mucinous OC	Weighted median	12	-0.274891	-1.21286	0.943332	0.770742	0.76(0.124-4.652)	0.256617	24.3356	0.0113902	0.548
SGLT2i	SLC5A2	Mucinous OC	Weighted mode	12	0.297925	1.31449	1.23839	0.81431	1.347(0.107-17.004)	0.256617	24.3356	0.0113902	0.548
SGLT2i	SLC5A2	Endometrioid OC	IVW(MRE)	12	-0.936331	-4.13123	0.734255	0.202234	0.392(0.093-1.653)	0.0528919	16.9427	0.109583	0.3508
SGLT2i	SLC5A2	Endometrioid OC	IVW(FE)	12	-0.936331	-4.13123	0.591633	0.113508	0.392(0.123-1.25)	0.0528919	16.9427	0.109583	0.3508
SGLT2i	SLC5A2	Endometrioid OC	Weighted median	12	-0.0331434	-0.146234	0.847341	0.968799	0.967(0.177-5.29)	0.0528919	16.9427	0.109583	0.3508
SGLT2i	SLC5A2	Endometrioid OC	Weighted mode	12	0.424938	1.87489	1.07316	0.6997	1.529(0.188-12.444)	0.0528919	16.9427	0.109583	0.3508
SGLT2i	SLC5A2	HGSOC (survival)	IVW(MRE)	10	-0.0383736	-0.16931	0.487626	0.937275	0.962(0.37-2.503)	0.143621	10.4282	0.316943	0.137
SGLT2i	SLC5A2	HGSOC (survival)	IVW(FE)	10	-0.0383736	-0.16931	0.453005	0.932493	0.962(0.396-2.339)	0.143621	10.4282	0.316943	0.137
SGLT2i	SLC5A2	HGSOC (survival)	Weighted median	10	0.358938	1.58369	0.63529	0.572075	1.432(0.409-5.017)	0.143621	10.4282	0.316943	0.137
SGLT2i	SLC5A2	HGSOC (survival)	Weighted mode	10	0.525826	2.32002	0.811072	0.532974	1.692(0.381-7.514)	0.143621	10.4282	0.316943	0.137
SGLT2i	SLC5A2	All OC (Histology Unadjusted)	IVW(MRE)	10	0.244261	1.07772	0.31932	0.444306	1.277(0.683-2.387)	0.0986096	6.26773	0.712852	0
SGLT2i	SLC5A2	All OC (Histology Unadjusted)	IVW(FE)	10	0.244261	1.07772	0.382642	0.523243	1.277(0.603-2.703)	0.0986096	6.26773	0.712852	0
SGLT2i	SLC5A2	All OC (Histology Unadjusted)	Weighted median	10	0.417034	1.84002	0.496862	0.401281	1.517(0.584-3.945)	0.0986096	6.26773	0.712852	0
SGLT2i	SLC5A2	All OC (Histology Unadjusted)	Weighted mode	10	0.529649	2.33689	0.634135	0.425204	1.698(0.469-6.152)	0.0986096	6.26773	0.712852	0
SGLT2i	SLC5A2	All OC (Histology Adjusted)	IVW(MRE)	11	-0.00458769	-0.0202416	0.357092	0.98975	0.995(0.494-2.004)	0.339489	9.22777	0.510633	0
SGLT2i	SLC5A2	All OC (Histology Adjusted)	IVW(FE)	11	-0.00458769	-0.0202416	0.371734	0.990153	0.995(0.48-2.063)	0.339489	9.22777	0.510633	0
SGLT2i	SLC5A2	All OC (Histology Adjusted)	Weighted median	11	0.129359	0.570749	0.509085	0.799418	1.138(0.437-2.965)	0.339489	9.22777	0.510633	0
SGLT2i	SLC5A2	All OC (Histology Adjusted)	Weighted mode	11	0.588235	2.59538	0.66359	0.396197	1.801(0.466-6.964)	0.339489	9.22777	0.510633	0
SGLT2i	SLC5A1	All OC	IVW(MRE)	9	0.0411389	0.113495	0.208406	0.843516	1.042(0.693-1.568)	0.801866	3.68738	0.884171	0
SGLT2i	SLC5A1	All OC	IVW(FE)	9	0.0411389	0.113495	0.30697	0.89339	1.042(0.571-1.902)	0.801866	3.68738	0.884171	0
SGLT2i	SLC5A1	All OC	Weighted median	9	-0.0727152	-0.200609	0.388049	0.851358	0.93(0.433-1.998)	0.801866	3.68738	0.884171	0
SGLT2i	SLC5A1	All OC	Weighted mode	9	-0.0286119	-0.0789352	0.540478	0.959079	0.972(0.329-2.868)	0.801866	3.68738	0.884171	0
SGLT2i	SLC5A1	HGSOC	IVW(MRE)	9	0.013932	0.0384358	0.399185	0.972159	1.014(0.464-2.217)	0.999908	9.53482	0.299203	0.161
SGLT2i	SLC5A1	HGSOC	IVW(FE)	9	0.013932	0.0384358	0.365647	0.969606	1.014(0.495-2.076)	0.999908	9.53482	0.299203	0.161
SGLT2i	SLC5A1	HGSOC	Weighted median	9	-0.0447005	-0.123321	0.479765	0.925767	0.956(0.373-2.455)	0.999908	9.53482	0.299203	0.161
SGLT2i	SLC5A1	HGSOC	Weighted mode	9	0.0151414	0.0417724	0.624342	0.981246	1.015(0.288-3.576)	0.999908	9.53482	0.299203	0.161
SGLT2i	SLC5A1	LGSOC	IVW(MRE)	9	2.90151	8.00476	0.863181	0.000775451	18.202(3.352-98.824)	0.349901	5.00484	0.757058	0
SGLT2i	SLC5A1	LGSOC	IVW(FE)	9	2.90151	8.00476	1.09132	0.0078439	18.202(2.144-154.546)	0.349901	5.00484	0.757058	0
SGLT2i	SLC5A1	LGSOC	Weighted median	9	1.78832	4.93367	1.45473	0.218954	5.979(0.357-100.272)	0.349901	5.00484	0.757058	0
SGLT2i	SLC5A1	LGSOC	Weighted mode	9	1.27334	3.51293	2.17684	0.574705	3.573(0.051-251.372)	0.349901	5.00484	0.757058	0
SGLT2i	SLC5A1	Clear cell OC	IVW(MRE)	9	0.525844	1.45071	0.564073	0.351219	1.692(0.56-5.111)	0.299725	2.95556	0.937115	0
SGLT2i	SLC5A1	Clear cell OC	IVW(FE)	9	0.525844	1.45071	0.928026	0.570968	1.692(0.274-10.431)	0.299725	2.95556	0.937115	0
SGLT2i	SLC5A1	Clear cell OC	Weighted median	9	0.13228	0.364937	1.15828	0.909076	1.141(0.12-10.845)	0.299725	2.95556	0.937115	0
SGLT2i	SLC5A1	Clear cell OC	Weighted mode	9	-0.642413	-1.77231	1.87119	0.740207	0.526(0.011-25.232)	0.299725	2.95556	0.937115	0
SGLT2i	SLC5A1	Mucinous OC	IVW(MRE)	9	0.344403	0.950148	0.621579	0.579526	1.411(0.417-4.772)	0.537643	6.41308	0.601064	0
SGLT2i	SLC5A1	Mucinous OC	IVW(FE)	9	0.344403	0.950148	0.694237	0.619832	1.411(0.362-5.502)	0.537643	6.41308	0.601064	0
SGLT2i	SLC5A1	Mucinous OC	Weighted median	9	0.887862	2.44946	0.911097	0.329809	2.43(0.426-13.856)	0.537643	6.41308	0.601064	0
SGLT2i	SLC5A1	Mucinous OC	Weighted mode	9	0.828203	2.28487	1.38207	0.565588	2.289(0.151-34.594)	0.537643	6.41308	0.601064	0
SGLT2i	SLC5A1	Endometrioid OC	IVW(MRE)	9	-0.361491	-0.997291	0.420824	0.390336	0.697(0.305-1.589)	0.273111	3.20708	0.920698	0
SGLT2i	SLC5A1	Endometrioid OC	IVW(FE)	9	-0.361491	-0.997291	0.664645	0.58652	0.697(0.189-2.563)	0.273111	3.20708	0.920698	0
SGLT2i	SLC5A1	Endometrioid OC	Weighted median	9	-0.0962904	-0.265648	0.847893	0.909583	0.908(0.178-4.629)	0.273111	3.20708	0.920698	0
SGLT2i	SLC5A1	Endometrioid OC	Weighted mode	9	-0.226608	-0.625172	1.17192	0.851493	0.797(0.088-7.182)	0.273111	3.20708	0.920698	0
SGLT2i	SLC5A1	HGSOC (survival)	IVW(MRE)	9	0.148902	0.410795	0.118956	0.210663	1.161(0.919-1.465)	0.682532	0.508714	0.999858	0
SGLT2i	SLC5A1	HGSOC (survival)	IVW(FE)	9	0.148902	0.410795	0.47173	0.752267	1.161(0.46-2.926)	0.682532	0.508714	0.999858	0
SGLT2i	SLC5A1	HGSOC (survival)	Weighted median	9	0.0410074	0.113132	0.597882	0.945318	1.042(0.343-3.16)	0.682532	0.508714	0.999858	0
SGLT2i	SLC5A1	HGSOC (survival)	Weighted mode	9	-0.00957314	-0.0264106	0.823947	0.991014	0.99(0.192-5.111)	0.682532	0.508714	0.999858	0
SGLT2i	SLC5A1	All OC (Histology Unadjusted)	IVW(MRE)	9	0.338575	0.934069	0.128718	0.00852921	1.403(1.09-1.806)	0.50637	0.818235	0.999157	0
SGLT2i	SLC5A1	All OC (Histology Unadjusted)	IVW(FE)	9	0.338575	0.934069	0.402479	0.400223	1.403(0.637-3.088)	0.50637	0.818235	0.999157	0
SGLT2i	SLC5A1	All OC (Histology Unadjusted)	Weighted median	9	0.384633	1.06114	0.485607	0.428322	1.469(0.583-3.703)	0.50637	0.818235	0.999157	0
SGLT2i	SLC5A1	All OC (Histology Unadjusted)	Weighted mode	9	0.48271	1.33171	0.623771	0.461269	1.62(0.387-6.781)	0.50637	0.818235	0.999157	0
SGLT2i	SLC5A1	All OC (Histology Adjusted)	IVW(MRE)	9	0.288074	0.794746	0.166612	0.0838082	1.334(0.962-1.849)	0.601839	1.36931	0.994671	0
SGLT2i	SLC5A1	All OC (Histology Adjusted)	IVW(FE)	9	0.288074	0.794746	0.402718	0.474409	1.334(0.606-2.937)	0.601839	1.36931	0.994671	0
SGLT2i	SLC5A1	All OC (Histology Adjusted)	Weighted median	9	0.293414	0.809479	0.507188	0.562918	1.341(0.497-3.62)	0.601839	1.36931	0.994671	0
SGLT2i	SLC5A1	All OC (Histology Adjusted)	Weighted mode	9	0.18837	0.51968	0.724327	0.801384	1.207(0.335-4.349)	0.601839	1.36931	0.994671	0
Other drugs	RAMP2	All OC	IVW(MRE)	7	2.02268	15.4967	0.410941	8.56e-07	7.559(3.378-16.914)	0.132725	5.66649	0.461567	0
Other drugs	RAMP2	All OC	IVW(FE)	7	2.02268	15.4967	0.422861	1.72e-06	7.559(3.3-17.314)	0.132725	5.66649	0.461567	0
Other drugs	RAMP2	All OC	Weighted median	7	1.92522	14.7499	0.556433	0.000540327	6.857(2.203-21.336)	0.132725	5.66649	0.461567	0
Other drugs	RAMP2	All OC	Weighted mode	7	2.64608	20.2728	0.873608	0.0231302	14.099(2.655-74.873)	0.132725	5.66649	0.461567	0
Other drugs	RAMP2	HGSOC	IVW(MRE)	7	1.82565	13.9871	0.577626	0.00157436	6.207(2.001-19.256)	0.0712665	7.94382	0.242248	0.2447
Other drugs	RAMP2	HGSOC	IVW(FE)	7	1.82565	13.9871	0.502004	0.000276124	6.207(2.32-16.603)	0.0712665	7.94382	0.242248	0.2447
Other drugs	RAMP2	HGSOC	Weighted median	7	1.70142	13.0353	0.694503	0.0142921	5.482(1.444-20.816)	0.0712665	7.94382	0.242248	0.2447
Other drugs	RAMP2	HGSOC	Weighted mode	7	2.86202	21.9272	1.09611	0.0400634	17.497(2.144-142.781)	0.0712665	7.94382	0.242248	0.2447
Other drugs	RAMP2	LGSOC	IVW(MRE)	7	-4.17205	-31.9639	0.938979	8.86e-06	0.015(0.002-0.097)	0.319197	2.29647	0.890514	0
Other drugs	RAMP2	LGSOC	IVW(FE)	7	-4.17205	-31.9639	1.51775	0.00598083	0.015(0.001-0.302)	0.319197	2.29647	0.890514	0
Other drugs	RAMP2	LGSOC	Weighted median	7	-4.23715	-32.4627	1.95234	0.0299847	0.014(0-0.642)	0.319197	2.29647	0.890514	0
Other drugs	RAMP2	LGSOC	Weighted mode	7	-6.17184	-47.2852	2.85268	0.0737178	0.002(0-0.676)	0.319197	2.29647	0.890514	0
Other drugs	RAMP2	Clear cell OC	IVW(MRE)	7	5.69954	43.6667	0.811416	2.15e-12	298.729(60.896-1465.444)	0.450766	2.20434	0.899979	0
Other drugs	RAMP2	Clear cell OC	IVW(FE)	7	5.69954	43.6667	1.33869	2.07e-05	298.729(21.665-4119.029)	0.450766	2.20434	0.899979	0
Other drugs	RAMP2	Clear cell OC	Weighted median	7	6.27988	48.1129	1.73978	0.000306692	533.723(18.708-15226.884)	0.450766	2.20434	0.899979	0
Other drugs	RAMP2	Clear cell OC	Weighted mode	7	6.44322	49.3644	2.51501	0.0427983	628.429(4.136-95482.34)	0.450766	2.20434	0.899979	0
Other drugs	RAMP2	Mucinous OC	IVW(MRE)	7	2.52454	19.3416	0.380764	3.35e-11	12.485(5.919-26.333)	0.725307	0.931058	0.988091	0
Other drugs	RAMP2	Mucinous OC	IVW(FE)	7	2.52454	19.3416	0.966592	0.00900671	12.485(1.878-83.018)	0.725307	0.931058	0.988091	0
Other drugs	RAMP2	Mucinous OC	Weighted median	7	2.36962	18.1547	1.19188	0.0467964	10.693(1.1-103.964)	0.725307	0.931058	0.988091	0
Other drugs	RAMP2	Mucinous OC	Weighted mode	7	2.44617	18.7412	1.60737	0.178871	11.544(0.433-307.589)	0.725307	0.931058	0.988091	0
Other drugs	RAMP2	Endometrioid OC	IVW(MRE)	7	2.73281	20.9373	0.971047	0.00488843	15.376(2.292-103.138)	0.0830153	6.71832	0.347684	0.1069
Other drugs	RAMP2	Endometrioid OC	IVW(FE)	7	2.73281	20.9373	0.917668	0.00290138	15.376(2.545-92.892)	0.0830153	6.71832	0.347684	0.1069
Other drugs	RAMP2	Endometrioid OC	Weighted median	7	1.80172	13.8037	1.23905	0.145916	6.06(0.519-70.782)	0.0830153	6.71832	0.347684	0.1069
Other drugs	RAMP2	Endometrioid OC	Weighted mode	7	0.46461	3.55958	1.99298	0.823415	1.591(0.033-76.861)	0.0830153	6.71832	0.347684	0.1069
Other drugs	RAMP2	HGSOC (survival)	IVW(MRE)	7	-0.177225	-1.3578	0.402206	0.65948	0.838(0.381-1.842)	0.19751	2.38655	0.880943	0
Other drugs	RAMP2	HGSOC (survival)	IVW(FE)	7	-0.177225	-1.3578	0.637734	0.781091	0.838(0.24-2.923)	0.19751	2.38655	0.880943	0
Other drugs	RAMP2	HGSOC (survival)	Weighted median	7	-0.233375	-1.78799	0.801106	0.77081	0.792(0.163-3.853)	0.19751	2.38655	0.880943	0
Other drugs	RAMP2	HGSOC (survival)	Weighted mode	7	-1.04739	-8.02452	1.19577	0.414765	0.351(0.034-3.59)	0.19751	2.38655	0.880943	0
Other drugs	RAMP2	All OC (Histology Unadjusted)	IVW(MRE)	7	0.192166	1.47227	0.588024	0.743819	1.212(0.383-3.837)	0.0876266	7.01623	0.319349	0.1448
Other drugs	RAMP2	All OC (Histology Unadjusted)	IVW(FE)	7	0.192166	1.47227	0.543775	0.723793	1.212(0.417-3.518)	0.0876266	7.01623	0.319349	0.1448
Other drugs	RAMP2	All OC (Histology Unadjusted)	Weighted median	7	0.492278	3.77156	0.746609	0.509669	1.636(0.415-6.456)	0.0876266	7.01623	0.319349	0.1448
Other drugs	RAMP2	All OC (Histology Unadjusted)	Weighted mode	7	1.39597	10.6951	1.30015	0.324229	4.039(0.31-52.631)	0.0876266	7.01623	0.319349	0.1448
Other drugs	RAMP2	All OC (Histology Adjusted)	IVW(MRE)	7	1.10075	8.43332	0.371841	0.00307376	3.006(1.451-6.231)	0.303177	2.78855	0.834879	0
Other drugs	RAMP2	All OC (Histology Adjusted)	IVW(FE)	7	1.10075	8.43332	0.545436	0.04358	3.006(1.032-8.757)	0.303177	2.78855	0.834879	0
Other drugs	RAMP2	All OC (Histology Adjusted)	Weighted median	7	1.37144	10.5072	0.680392	0.0438358	3.941(1.053-14.754)	0.303177	2.78855	0.834879	0
Other drugs	RAMP2	All OC (Histology Adjusted)	Weighted mode	7	1.70579	13.0688	1.06583	0.16062	5.506(0.6-50.554)	0.303177	2.78855	0.834879	0
Other drugs	RAMP3	All OC	IVW(MRE)	2	-0.79238	-1.09894	0.545187	0.14611	0.453(0.156-1.318)	NA	0.455276	0.49984	0
Other drugs	RAMP3	All OC	IVW(FE)	2	-0.79238	-1.09894	0.807994	0.326753	0.453(0.093-2.206)	NA	0.455276	0.49984	0
Other drugs	RAMP3	HGSOC	IVW(MRE)	2	-1.50092	-2.0816	1.56999	0.339071	0.223(0.01-4.837)	NA	2.62835	0.10497	0.6195
Other drugs	RAMP3	HGSOC	IVW(FE)	2	-1.50092	-2.0816	0.968401	0.121168	0.223(0.033-1.488)	NA	2.62835	0.10497	0.6195
Other drugs	RAMP3	LGSOC	IVW(MRE)	2	-3.78819	-5.2538	3.49047	0.277791	0.023(0-21.182)	NA	1.26138	0.26139	0.2072
Other drugs	RAMP3	LGSOC	IVW(FE)	2	-3.78819	-5.2538	3.10786	0.22288	0.023(0-10.006)	NA	1.26138	0.26139	0.2072
Other drugs	RAMP3	Clear cell OC	IVW(MRE)	2	4.26362	5.91316	0.545738	5.6e-15	71.067(24.385-207.114)	NA	0.057247	0.810901	0
Other drugs	RAMP3	Clear cell OC	IVW(FE)	2	4.26362	5.91316	2.28091	0.0615858	71.067(0.813-6211.755)	NA	0.057247	0.810901	0
Other drugs	RAMP3	Mucinous OC	IVW(MRE)	2	-0.773693	-1.07303	2.21405	0.726754	0.461(0.006-35.369)	NA	1.53582	0.215241	0.3489
Other drugs	RAMP3	Mucinous OC	IVW(FE)	2	-0.773693	-1.07303	1.78656	0.664968	0.461(0.014-15.302)	NA	1.53582	0.215241	0.3489
Other drugs	RAMP3	Endometrioid OC	IVW(MRE)	2	-3.09707	-4.29529	0.141009	6.4e-107	0.045(0.034-0.06)	NA	0.00626484	0.936913	0
Other drugs	RAMP3	Endometrioid OC	IVW(FE)	2	-3.09707	-4.29529	1.78152	0.0821324	0.045(0.001-1.484)	NA	0.00626484	0.936913	0
Other drugs	RAMP3	HGSOC (survival)	IVW(MRE)	2	1.36256	1.88972	0.388785	0.000457165	3.906(1.823-8.369)	NA	0.0914072	0.762396	0
Other drugs	RAMP3	HGSOC (survival)	IVW(FE)	2	1.36256	1.88972	1.28593	0.289331	3.906(0.314-48.569)	NA	0.0914072	0.762396	0
Other drugs	RAMP3	All OC (Histology Unadjusted)	IVW(MRE)	2	-0.013457	-0.0186634	1.12051	0.990418	0.987(0.11-8.871)	NA	1.03049	0.310045	0.0296
Other drugs	RAMP3	All OC (Histology Unadjusted)	IVW(FE)	2	-0.013457	-0.0186634	1.10381	0.990273	0.987(0.113-8.585)	NA	1.03049	0.310045	0.0296
Other drugs	RAMP3	All OC (Histology Adjusted)	IVW(MRE)	2	0.440298	0.610644	0.432818	0.309019	1.553(0.665-3.628)	NA	0.152426	0.696228	0
Other drugs	RAMP3	All OC (Histology Adjusted)	IVW(FE)	2	0.440298	0.610644	1.1086	0.691246	1.553(0.177-13.642)	NA	0.152426	0.696228	0
Other drugs	GCK	All OC	IVW(MRE)	36	-0.221918	-0.225602	0.0778195	0.00434857	0.801(0.688-0.933)	0.449892	23.5593	0.929391	0
Other drugs	GCK	All OC	IVW(FE)	36	-0.221918	-0.225602	0.094851	0.0193017	0.801(0.665-0.965)	0.449892	23.5593	0.929391	0
Other drugs	GCK	All OC	Weighted median	36	-0.156655	-0.159255	0.137688	0.255222	0.855(0.651-1.124)	0.449892	23.5593	0.929391	0
Other drugs	GCK	All OC	Weighted mode	36	-0.153647	-0.156197	0.129963	0.245083	0.858(0.669-1.099)	0.449892	23.5593	0.929391	0
Other drugs	GCK	HGSOC	IVW(MRE)	36	-0.360977	-0.366969	0.115772	0.00182082	0.697(0.555-0.875)	0.622233	36.9182	0.380318	0.052
Other drugs	GCK	HGSOC	IVW(FE)	36	-0.360977	-0.366969	0.112724	0.00136333	0.697(0.559-0.869)	0.622233	36.9182	0.380318	0.052
Other drugs	GCK	HGSOC	Weighted median	36	-0.303622	-0.308661	0.172644	0.0786364	0.738(0.545-1)	0.622233	36.9182	0.380318	0.052
Other drugs	GCK	HGSOC	Weighted mode	36	-0.317373	-0.322641	0.147793	0.0387649	0.728(0.532-0.996)	0.622233	36.9182	0.380318	0.052
Other drugs	GCK	LGSOC	IVW(MRE)	36	1.1641	1.18342	0.382891	0.00236342	3.203(1.512-6.784)	0.721834	43.3093	0.158113	0.1919
Other drugs	GCK	LGSOC	IVW(FE)	36	1.1641	1.18342	0.344206	0.000719613	3.203(1.631-6.289)	0.721834	43.3093	0.158113	0.1919
Other drugs	GCK	LGSOC	Weighted median	36	0.927378	0.94277	0.499667	0.0634544	2.528(0.998-6.405)	0.721834	43.3093	0.158113	0.1919
Other drugs	GCK	LGSOC	Weighted mode	36	0.839427	0.853359	0.461119	0.0772559	2.315(0.939-5.709)	0.721834	43.3093	0.158113	0.1919
Other drugs	GCK	Clear cell OC	IVW(MRE)	36	-0.174752	-0.177652	0.215567	0.417559	0.84(0.55-1.281)	0.329258	19.9538	0.980615	0
Other drugs	GCK	Clear cell OC	IVW(FE)	36	-0.174752	-0.177652	0.285498	0.540474	0.84(0.48-1.469)	0.329258	19.9538	0.980615	0
Other drugs	GCK	Clear cell OC	Weighted median	36	-0.305172	-0.310237	0.407688	0.454133	0.737(0.328-1.654)	0.329258	19.9538	0.980615	0
Other drugs	GCK	Clear cell OC	Weighted mode	36	-0.304825	-0.309884	0.384905	0.433726	0.737(0.351-1.548)	0.329258	19.9538	0.980615	0
Other drugs	GCK	Mucinous OC	IVW(MRE)	36	-1.21022	-1.2303	0.177069	8.22e-12	0.298(0.211-0.422)	0.00921885	23.8547	0.922974	0
Other drugs	GCK	Mucinous OC	IVW(FE)	36	-1.21022	-1.2303	0.214482	1.68e-08	0.298(0.196-0.454)	0.00921885	23.8547	0.922974	0
Other drugs	GCK	Mucinous OC	Weighted median	36	-1.27894	-1.30017	0.320699	6.66e-05	0.278(0.148-0.523)	0.00921885	23.8547	0.922974	0
Other drugs	GCK	Mucinous OC	Weighted mode	36	-0.75325	-0.765752	0.288955	0.0133387	0.471(0.247-0.898)	0.00921885	23.8547	0.922974	0
Other drugs	GCK	Endometrioid OC	IVW(MRE)	36	0.0617472	0.0627721	0.218288	0.777276	1.064(0.693-1.632)	0.258629	38.9737	0.295584	0.102
Other drugs	GCK	Endometrioid OC	IVW(FE)	36	0.0617472	0.0627721	0.206861	0.765324	1.064(0.709-1.596)	0.258629	38.9737	0.295584	0.102
Other drugs	GCK	Endometrioid OC	Weighted median	36	0.0354942	0.0360833	0.322149	0.912267	1.036(0.551-1.95)	0.258629	38.9737	0.295584	0.102
Other drugs	GCK	Endometrioid OC	Weighted mode	36	0.289474	0.294278	0.31012	0.356995	1.336(0.779-2.291)	0.258629	38.9737	0.295584	0.102
Other drugs	GCK	HGSOC (survival)	IVW(MRE)	35	-0.44189	-0.449225	0.134528	0.00102076	0.643(0.494-0.837)	0.310089	28.0595	0.753335	0
Other drugs	GCK	HGSOC (survival)	IVW(FE)	35	-0.44189	-0.449225	0.148085	0.00284487	0.643(0.481-0.859)	0.310089	28.0595	0.753335	0
Other drugs	GCK	HGSOC (survival)	Weighted median	35	-0.269868	-0.274347	0.213766	0.206789	0.763(0.501-1.164)	0.310089	28.0595	0.753335	0
Other drugs	GCK	HGSOC (survival)	Weighted mode	35	-0.290225	-0.295042	0.198232	0.15236	0.748(0.513-1.092)	0.310089	28.0595	0.753335	0
Other drugs	GCK	All OC (Histology Unadjusted)	IVW(MRE)	34	-0.0368787	-0.0374908	0.134272	0.783581	0.964(0.741-1.254)	0.7083	32.1017	0.511657	0
Other drugs	GCK	All OC (Histology Unadjusted)	IVW(FE)	34	-0.0368787	-0.0374908	0.136138	0.786474	0.964(0.738-1.259)	0.7083	32.1017	0.511657	0
Other drugs	GCK	All OC (Histology Unadjusted)	Weighted median	34	-0.0748073	-0.0760489	0.201601	0.710588	0.928(0.626-1.375)	0.7083	32.1017	0.511657	0
Other drugs	GCK	All OC (Histology Unadjusted)	Weighted mode	34	0.0883129	0.0897787	0.198444	0.659207	1.092(0.744-1.603)	0.7083	32.1017	0.511657	0
Other drugs	GCK	All OC (Histology Adjusted)	IVW(MRE)	36	-0.201226	-0.204566	0.12616	0.110709	0.818(0.639-1.047)	0.411517	35.4146	0.44865	0.0117
Other drugs	GCK	All OC (Histology Adjusted)	IVW(FE)	36	-0.201226	-0.204566	0.125419	0.108619	0.818(0.64-1.046)	0.411517	35.4146	0.44865	0.0117
Other drugs	GCK	All OC (Histology Adjusted)	Weighted median	36	-0.105585	-0.107338	0.19223	0.582824	0.9(0.619-1.308)	0.411517	35.4146	0.44865	0.0117
Other drugs	GCK	All OC (Histology Adjusted)	Weighted mode	36	-0.0614974	-0.0625181	0.173285	0.7248	0.94(0.682-1.296)	0.411517	35.4146	0.44865	0.0117
Other drugs	AKR1A1	All OC	IVW(MRE)	5	0.557522	2.6894	0.107819	2.33e-07	1.746(1.414-2.157)	0.915272	0.384282	0.983743	0
Other drugs	AKR1A1	All OC	IVW(FE)	5	0.557522	2.6894	0.347858	0.108994	1.746(0.883-3.453)	0.915272	0.384282	0.983743	0
Other drugs	AKR1A1	All OC	Weighted median	5	0.464232	2.23938	0.431047	0.281487	1.591(0.707-3.58)	0.915272	0.384282	0.983743	0
Other drugs	AKR1A1	All OC	Weighted mode	5	0.391127	1.88674	0.563331	0.525704	1.479(0.511-4.278)	0.915272	0.384282	0.983743	0
Other drugs	AKR1A1	HGSOC	IVW(MRE)	5	0.477634	2.30403	0.102401	3.1e-06	1.612(1.319-1.971)	0.82577	0.244544	0.993107	0
Other drugs	AKR1A1	HGSOC	IVW(FE)	5	0.477634	2.30403	0.414147	0.248789	1.612(0.716-3.63)	0.82577	0.244544	0.993107	0
Other drugs	AKR1A1	HGSOC	Weighted median	5	0.547925	2.64311	0.479499	0.253162	1.73(0.667-4.486)	0.82577	0.244544	0.993107	0
Other drugs	AKR1A1	HGSOC	Weighted mode	5	0.649962	3.13532	0.637604	0.36566	1.915(0.575-6.379)	0.82577	0.244544	0.993107	0
Other drugs	AKR1A1	LGSOC	IVW(MRE)	5	4.11253	19.8382	0.456398	2.05e-19	61.101(24.978-149.466)	0.547587	0.535459	0.969958	0
Other drugs	AKR1A1	LGSOC	IVW(FE)	5	4.11253	19.8382	1.24741	0.000977791	61.101(5.299-704.479)	0.547587	0.535459	0.969958	0
Other drugs	AKR1A1	LGSOC	Weighted median	5	3.85082	18.5758	1.55246	0.013121	47.031(2.683-824.291)	0.547587	0.535459	0.969958	0
Other drugs	AKR1A1	LGSOC	Weighted mode	5	3.83565	18.5026	1.86665	0.10909	46.323(1.154-1859.436)	0.547587	0.535459	0.969958	0
Other drugs	AKR1A1	Clear cell OC	IVW(MRE)	5	-0.26802	-1.29289	0.99787	0.788243	0.765(0.108-5.408)	0.161199	3.58843	0.464561	0
Other drugs	AKR1A1	Clear cell OC	IVW(FE)	5	-0.26802	-1.29289	1.05354	0.799187	0.765(0.097-6.031)	0.161199	3.58843	0.464561	0
Other drugs	AKR1A1	Clear cell OC	Weighted median	5	0.605152	2.91916	1.27861	0.636006	1.832(0.146-23.037)	0.161199	3.58843	0.464561	0
Other drugs	AKR1A1	Clear cell OC	Weighted mode	5	0.646593	3.11907	1.49871	0.688389	1.909(0.113-32.218)	0.161199	3.58843	0.464561	0
Other drugs	AKR1A1	Mucinous OC	IVW(MRE)	5	-1.18579	-5.72005	0.123798	9.86e-22	0.306(0.24-0.389)	0.849115	0.0981271	0.998835	0
Other drugs	AKR1A1	Mucinous OC	IVW(FE)	5	-1.18579	-5.72005	0.790405	0.133556	0.306(0.065-1.438)	0.849115	0.0981271	0.998835	0
Other drugs	AKR1A1	Mucinous OC	Weighted median	5	-1.19121	-5.74623	0.925897	0.198252	0.304(0.048-1.909)	0.849115	0.0981271	0.998835	0
Other drugs	AKR1A1	Mucinous OC	Weighted mode	5	-1.3807	-6.6603	1.14707	0.295074	0.251(0.023-2.729)	0.849115	0.0981271	0.998835	0
Other drugs	AKR1A1	Endometrioid OC	IVW(MRE)	5	1.50509	7.26033	0.182504	1.63e-16	4.505(3.15-6.442)	0.676564	0.236296	0.993547	0
Other drugs	AKR1A1	Endometrioid OC	IVW(FE)	5	1.50509	7.26033	0.750887	0.0450253	4.505(1.034-19.625)	0.676564	0.236296	0.993547	0
Other drugs	AKR1A1	Endometrioid OC	Weighted median	5	1.67223	8.06659	0.891186	0.0605987	5.324(0.976-29.051)	0.676564	0.236296	0.993547	0
Other drugs	AKR1A1	Endometrioid OC	Weighted mode	5	1.69571	8.17986	1.09969	0.197936	5.451(0.531-55.98)	0.676564	0.236296	0.993547	0
Other drugs	AKR1A1	HGSOC (survival)	IVW(MRE)	5	-1.49445	-7.20898	0.112608	3.4e-40	0.224(0.18-0.28)	0.717201	0.172683	0.99648	0
Other drugs	AKR1A1	HGSOC (survival)	IVW(FE)	5	-1.49445	-7.20898	0.541967	0.00582542	0.224(0.078-0.649)	0.717201	0.172683	0.99648	0
Other drugs	AKR1A1	HGSOC (survival)	Weighted median	5	-1.58042	-7.62369	0.649666	0.0149883	0.206(0.058-0.728)	0.717201	0.172683	0.99648	0
Other drugs	AKR1A1	HGSOC (survival)	Weighted mode	5	-1.59382	-7.68834	0.82791	0.126525	0.203(0.043-0.964)	0.717201	0.172683	0.99648	0
Other drugs	AKR1A1	All OC (Histology Unadjusted)	IVW(MRE)	5	-1.25044	-6.03195	0.433963	0.00395853	0.286(0.122-0.67)	0.160786	3.54618	0.470891	0
Other drugs	AKR1A1	All OC (Histology Unadjusted)	IVW(FE)	5	-1.25044	-6.03195	0.460896	0.00666627	0.286(0.116-0.707)	0.160786	3.54618	0.470891	0
Other drugs	AKR1A1	All OC (Histology Unadjusted)	Weighted median	5	-1.55549	-7.50347	0.578186	0.00713872	0.211(0.07-0.64)	0.160786	3.54618	0.470891	0
Other drugs	AKR1A1	All OC (Histology Unadjusted)	Weighted mode	5	-1.59908	-7.71372	0.724334	0.0918654	0.202(0.052-0.787)	0.160786	3.54618	0.470891	0
Other drugs	AKR1A1	All OC (Histology Adjusted)	IVW(MRE)	5	-1.44156	-6.95386	0.306477	2.56e-06	0.237(0.13-0.431)	0.283086	1.75479	0.780742	0
Other drugs	AKR1A1	All OC (Histology Adjusted)	IVW(FE)	5	-1.44156	-6.95386	0.462716	0.00183681	0.237(0.096-0.586)	0.283086	1.75479	0.780742	0
Other drugs	AKR1A1	All OC (Histology Adjusted)	Weighted median	5	-1.64783	-7.94887	0.561938	0.00336356	0.192(0.062-0.596)	0.283086	1.75479	0.780742	0
Other drugs	AKR1A1	All OC (Histology Adjusted)	Weighted mode	5	-1.65457	-7.9814	0.675403	0.0704639	0.191(0.044-0.837)	0.283086	1.75479	0.780742	0
Sulfonylureas	ABCC8/KCNJ11+ABCB11+CPT1A+INS+PPARG+VEGFA	All OC	IVW(MRE)	60	0.0787797	0.162645	0.11292	0.485389	1.082(0.867-1.35)	0.110218	62.945	0.338536	0.0627
Sulfonylureas	ABCC8/KCNJ11+ABCB11+CPT1A+INS+PPARG+VEGFA	All OC	IVW(FE)	60	0.0787797	0.162645	0.109324	0.47115	1.082(0.873-1.341)	0.110218	62.945	0.338536	0.0627
Sulfonylureas	ABCC8/KCNJ11+ABCB11+CPT1A+INS+PPARG+VEGFA	All OC	Weighted median	60	0.0469281	0.0968857	0.163853	0.774568	1.048(0.766-1.434)	0.110218	62.945	0.338536	0.0627
Sulfonylureas	ABCC8/KCNJ11+ABCB11+CPT1A+INS+PPARG+VEGFA	All OC	Weighted mode	60	-5.57e-06	-1.14996e-05	0.259759	0.999983	1(0.614-1.628)	0.110218	62.945	0.338536	0.0627
Sulfonylureas	ABCC8/KCNJ11+ABCB11+CPT1A+INS+PPARG+VEGFA	HGSOC	IVW(MRE)	60	0.0965266	0.199284	0.128878	0.453872	1.101(0.855-1.418)	0.061222	57.9769	0.51325	0
Sulfonylureas	ABCC8/KCNJ11+ABCB11+CPT1A+INS+PPARG+VEGFA	HGSOC	IVW(FE)	60	0.0965266	0.199284	0.13001	0.457813	1.101(0.854-1.421)	0.061222	57.9769	0.51325	0
Sulfonylureas	ABCC8/KCNJ11+ABCB11+CPT1A+INS+PPARG+VEGFA	HGSOC	Weighted median	60	0.0681202	0.140638	0.192286	0.72314	1.07(0.745-1.539)	0.061222	57.9769	0.51325	0
Sulfonylureas	ABCC8/KCNJ11+ABCB11+CPT1A+INS+PPARG+VEGFA	HGSOC	Weighted mode	60	0.0381126	0.0786855	0.287355	0.894935	1.039(0.596-1.811)	0.061222	57.9769	0.51325	0
Sulfonylureas	ABCC8/KCNJ11+ABCB11+CPT1A+INS+PPARG+VEGFA	LGSOC	IVW(MRE)	60	-0.874967	-1.80642	0.308194	0.00452534	0.417(0.228-0.763)	0.785648	35.9134	0.992383	0
Sulfonylureas	ABCC8/KCNJ11+ABCB11+CPT1A+INS+PPARG+VEGFA	LGSOC	IVW(FE)	60	-0.874967	-1.80642	0.395023	0.0267615	0.417(0.192-0.904)	0.785648	35.9134	0.992383	0
Sulfonylureas	ABCC8/KCNJ11+ABCB11+CPT1A+INS+PPARG+VEGFA	LGSOC	Weighted median	60	-0.688367	-1.42117	0.579411	0.234815	0.502(0.168-1.503)	0.785648	35.9134	0.992383	0
Sulfonylureas	ABCC8/KCNJ11+ABCB11+CPT1A+INS+PPARG+VEGFA	LGSOC	Weighted mode	60	-0.500093	-1.03247	0.922197	0.589665	0.606(0.094-3.895)	0.785648	35.9134	0.992383	0
Sulfonylureas	ABCC8/KCNJ11+ABCB11+CPT1A+INS+PPARG+VEGFA	Clear cell OC	IVW(MRE)	60	0.111826	0.230871	0.303999	0.712985	1.118(0.616-2.029)	0.190591	49.8826	0.795224	0
Sulfonylureas	ABCC8/KCNJ11+ABCB11+CPT1A+INS+PPARG+VEGFA	Clear cell OC	IVW(FE)	60	0.111826	0.230871	0.330616	0.735185	1.118(0.585-2.138)	0.190591	49.8826	0.795224	0
Sulfonylureas	ABCC8/KCNJ11+ABCB11+CPT1A+INS+PPARG+VEGFA	Clear cell OC	Weighted median	60	0.319746	0.660132	0.463382	0.490178	1.377(0.532-3.562)	0.190591	49.8826	0.795224	0
Sulfonylureas	ABCC8/KCNJ11+ABCB11+CPT1A+INS+PPARG+VEGFA	Clear cell OC	Weighted mode	60	0.404607	0.835333	0.839752	0.631718	1.499(0.24-9.37)	0.190591	49.8826	0.795224	0
Sulfonylureas	ABCC8/KCNJ11+ABCB11+CPT1A+INS+PPARG+VEGFA	Mucinous OC	IVW(MRE)	60	0.0474975	0.0980612	0.264846	0.857671	1.049(0.624-1.762)	0.457536	67.5911	0.207205	0.1271
Sulfonylureas	ABCC8/KCNJ11+ABCB11+CPT1A+INS+PPARG+VEGFA	Mucinous OC	IVW(FE)	60	0.0474975	0.0980612	0.247443	0.847779	1.049(0.646-1.703)	0.457536	67.5911	0.207205	0.1271
Sulfonylureas	ABCC8/KCNJ11+ABCB11+CPT1A+INS+PPARG+VEGFA	Mucinous OC	Weighted median	60	-0.279427	-0.576893	0.382417	0.464971	0.756(0.358-1.597)	0.457536	67.5911	0.207205	0.1271
Sulfonylureas	ABCC8/KCNJ11+ABCB11+CPT1A+INS+PPARG+VEGFA	Mucinous OC	Weighted mode	60	-0.310534	-0.641114	0.668195	0.643832	0.733(0.202-2.656)	0.457536	67.5911	0.207205	0.1271
Sulfonylureas	ABCC8/KCNJ11+ABCB11+CPT1A+INS+PPARG+VEGFA	Endometrioid OC	IVW(MRE)	60	0.687132	1.41862	0.218614	0.00167149	1.988(1.295-3.051)	0.715227	50.5156	0.776312	0
Sulfonylureas	ABCC8/KCNJ11+ABCB11+CPT1A+INS+PPARG+VEGFA	Endometrioid OC	IVW(FE)	60	0.687132	1.41862	0.23626	0.00363318	1.988(1.251-3.159)	0.715227	50.5156	0.776312	0
Sulfonylureas	ABCC8/KCNJ11+ABCB11+CPT1A+INS+PPARG+VEGFA	Endometrioid OC	Weighted median	60	0.686403	1.41712	0.353322	0.0520512	1.987(1.007-3.917)	0.715227	50.5156	0.776312	0
Sulfonylureas	ABCC8/KCNJ11+ABCB11+CPT1A+INS+PPARG+VEGFA	Endometrioid OC	Weighted mode	60	0.838315	1.73075	0.632793	0.190351	2.312(0.709-7.541)	0.715227	50.5156	0.776312	0
Sulfonylureas	ABCC8/KCNJ11+ABCB11+CPT1A+INS+PPARG+VEGFA	HGSOC (survival)	IVW(MRE)	58	-0.467596	-0.965378	0.170655	0.0061438	0.627(0.448-0.875)	0.273142	55.1542	0.544636	0
Sulfonylureas	ABCC8/KCNJ11+ABCB11+CPT1A+INS+PPARG+VEGFA	HGSOC (survival)	IVW(FE)	58	-0.467596	-0.965378	0.173487	0.00703302	0.627(0.446-0.88)	0.273142	55.1542	0.544636	0
Sulfonylureas	ABCC8/KCNJ11+ABCB11+CPT1A+INS+PPARG+VEGFA	HGSOC (survival)	Weighted median	58	-0.332861	-0.68721	0.265105	0.209268	0.717(0.439-1.17)	0.273142	55.1542	0.544636	0
Sulfonylureas	ABCC8/KCNJ11+ABCB11+CPT1A+INS+PPARG+VEGFA	HGSOC (survival)	Weighted mode	58	-0.0551279	-0.113814	0.516412	0.915361	0.946(0.383-2.339)	0.273142	55.1542	0.544636	0
Sulfonylureas	ABCC8/KCNJ11+ABCB11+CPT1A+INS+PPARG+VEGFA	All OC (Histology Unadjusted)	IVW(MRE)	59	-0.406005	-0.838219	0.158802	0.0105676	0.666(0.488-0.91)	0.785399	68.6762	0.159312	0.1555
Sulfonylureas	ABCC8/KCNJ11+ABCB11+CPT1A+INS+PPARG+VEGFA	All OC (Histology Unadjusted)	IVW(FE)	59	-0.406005	-0.838219	0.145937	0.00540161	0.666(0.501-0.887)	0.785399	68.6762	0.159312	0.1555
Sulfonylureas	ABCC8/KCNJ11+ABCB11+CPT1A+INS+PPARG+VEGFA	All OC (Histology Unadjusted)	Weighted median	59	-0.0525542	-0.108501	0.225067	0.81537	0.949(0.609-1.478)	0.785399	68.6762	0.159312	0.1555
Sulfonylureas	ABCC8/KCNJ11+ABCB11+CPT1A+INS+PPARG+VEGFA	All OC (Histology Unadjusted)	Weighted mode	59	0.0304602	0.0628867	0.40623	0.940487	1.031(0.449-2.366)	0.785399	68.6762	0.159312	0.1555
Sulfonylureas	ABCC8/KCNJ11+ABCB11+CPT1A+INS+PPARG+VEGFA	All OC (Histology Adjusted)	IVW(MRE)	58	-0.322679	-0.666188	0.158609	0.0419083	0.724(0.531-0.988)	0.50763	66.1221	0.190973	0.138
Sulfonylureas	ABCC8/KCNJ11+ABCB11+CPT1A+INS+PPARG+VEGFA	All OC (Histology Adjusted)	IVW(FE)	58	-0.322679	-0.666188	0.147263	0.0284387	0.724(0.543-0.967)	0.50763	66.1221	0.190973	0.138
Sulfonylureas	ABCC8/KCNJ11+ABCB11+CPT1A+INS+PPARG+VEGFA	All OC (Histology Adjusted)	Weighted median	58	-0.0739644	-0.152704	0.218409	0.734872	0.929(0.598-1.442)	0.50763	66.1221	0.190973	0.138
Sulfonylureas	ABCC8/KCNJ11+ABCB11+CPT1A+INS+PPARG+VEGFA	All OC (Histology Adjusted)	Weighted mode	58	0.0891226	0.183998	0.404004	0.826193	1.093(0.527-2.269)	0.50763	66.1221	0.190973	0.138
TZDs	SLC29A1+RXRB+PPARG	All OC	IVW(MRE)	60	-0.225114	-1.06832	0.108684	0.0383331	0.798(0.645-0.988)	0.745995	66.9399	0.223252	0.1186
TZDs	SLC29A1+RXRB+PPARG	All OC	IVW(FE)	60	-0.225114	-1.06832	0.102035	0.0273667	0.798(0.654-0.975)	0.745995	66.9399	0.223252	0.1186
TZDs	SLC29A1+RXRB+PPARG	All OC	Weighted median	60	-0.284663	-1.35092	0.154699	0.0657519	0.752(0.569-0.995)	0.745995	66.9399	0.223252	0.1186
TZDs	SLC29A1+RXRB+PPARG	All OC	Weighted mode	60	-0.19299	-0.915867	0.250322	0.443804	0.824(0.515-1.321)	0.745995	66.9399	0.223252	0.1186
TZDs	SLC29A1+RXRB+PPARG	HGSOC	IVW(MRE)	60	-0.39727	-1.88532	0.142734	0.00538107	0.672(0.508-0.889)	0.827573	81.7358	0.0266992	0.2782
TZDs	SLC29A1+RXRB+PPARG	HGSOC	IVW(FE)	60	-0.39727	-1.88532	0.121268	0.00105303	0.672(0.53-0.852)	0.827573	81.7358	0.0266992	0.2782
TZDs	SLC29A1+RXRB+PPARG	HGSOC	Weighted median	60	-0.442397	-2.09948	0.195749	0.02382	0.642(0.445-0.927)	0.827573	81.7358	0.0266992	0.2782
TZDs	SLC29A1+RXRB+PPARG	HGSOC	Weighted mode	60	-0.424403	-2.01408	0.375248	0.262634	0.654(0.324-1.32)	0.827573	81.7358	0.0266992	0.2782
TZDs	SLC29A1+RXRB+PPARG	LGSOC	IVW(MRE)	60	-0.387609	-1.83947	0.339412	0.253453	0.679(0.349-1.32)	0.946183	50.2278	0.785011	0
TZDs	SLC29A1+RXRB+PPARG	LGSOC	IVW(FE)	60	-0.387609	-1.83947	0.367859	0.292025	0.679(0.33-1.396)	0.946183	50.2278	0.785011	0
TZDs	SLC29A1+RXRB+PPARG	LGSOC	Weighted median	60	-0.480168	-2.27872	0.547045	0.38008	0.619(0.214-1.791)	0.946183	50.2278	0.785011	0
TZDs	SLC29A1+RXRB+PPARG	LGSOC	Weighted mode	60	-0.420344	-1.99482	0.849254	0.622469	0.657(0.12-3.596)	0.946183	50.2278	0.785011	0
TZDs	SLC29A1+RXRB+PPARG	Clear cell OC	IVW(MRE)	60	0.075695	0.359224	0.266685	0.776535	1.079(0.64-1.819)	0.5168	44.1498	0.924989	0
TZDs	SLC29A1+RXRB+PPARG	Clear cell OC	IVW(FE)	60	0.075695	0.359224	0.30829	0.806045	1.079(0.589-1.974)	0.5168	44.1498	0.924989	0
TZDs	SLC29A1+RXRB+PPARG	Clear cell OC	Weighted median	60	0.336904	1.59884	0.446805	0.450832	1.401(0.584-3.356)	0.5168	44.1498	0.924989	0
TZDs	SLC29A1+RXRB+PPARG	Clear cell OC	Weighted mode	60	0.0354965	0.168455	0.790688	0.964344	1.036(0.224-4.791)	0.5168	44.1498	0.924989	0
TZDs	SLC29A1+RXRB+PPARG	Mucinous OC	IVW(MRE)	60	0.082955	0.393678	0.242565	0.732357	1.086(0.675-1.748)	0.424764	65.3871	0.264709	0.0977
TZDs	SLC29A1+RXRB+PPARG	Mucinous OC	IVW(FE)	60	0.082955	0.393678	0.230413	0.718827	1.086(0.692-1.707)	0.424764	65.3871	0.264709	0.0977
TZDs	SLC29A1+RXRB+PPARG	Mucinous OC	Weighted median	60	0.109128	0.517885	0.349601	0.754927	1.115(0.562-2.213)	0.424764	65.3871	0.264709	0.0977
TZDs	SLC29A1+RXRB+PPARG	Mucinous OC	Weighted mode	60	-0.0195405	-0.0927331	0.555518	0.972059	0.981(0.322-2.982)	0.424764	65.3871	0.264709	0.0977
TZDs	SLC29A1+RXRB+PPARG	Endometrioid OC	IVW(MRE)	60	0.432063	2.05043	0.217026	0.0464991	1.54(1.007-2.357)	0.567072	56.8133	0.556551	0
TZDs	SLC29A1+RXRB+PPARG	Endometrioid OC	IVW(FE)	60	0.432063	2.05043	0.221163	0.0507493	1.54(0.999-2.376)	0.567072	56.8133	0.556551	0
TZDs	SLC29A1+RXRB+PPARG	Endometrioid OC	Weighted median	60	0.408551	1.93885	0.338622	0.227621	1.505(0.801-2.827)	0.567072	56.8133	0.556551	0
TZDs	SLC29A1+RXRB+PPARG	Endometrioid OC	Weighted mode	60	0.376655	1.78748	0.524398	0.475431	1.457(0.492-4.319)	0.567072	56.8133	0.556551	0
TZDs	SLC29A1+RXRB+PPARG	HGSOC (survival)	IVW(MRE)	57	0.220436	1.04612	0.197215	0.263674	1.247(0.847-1.835)	0.137288	84.027	0.00904964	0.3335
TZDs	SLC29A1+RXRB+PPARG	HGSOC (survival)	IVW(FE)	57	0.220436	1.04612	0.160999	0.170944	1.247(0.909-1.709)	0.137288	84.027	0.00904964	0.3335
TZDs	SLC29A1+RXRB+PPARG	HGSOC (survival)	Weighted median	57	0.500967	2.37743	0.26841	0.0619817	1.65(0.995-2.737)	0.137288	84.027	0.00904964	0.3335
TZDs	SLC29A1+RXRB+PPARG	HGSOC (survival)	Weighted mode	57	1.14535	5.43547	0.424519	0.00920158	3.144(1.483-6.663)	0.137288	84.027	0.00904964	0.3335
TZDs	SLC29A1+RXRB+PPARG	All OC (Histology Unadjusted)	IVW(MRE)	58	-0.161829	-0.767986	0.138295	0.241933	0.851(0.649-1.115)	0.877132	59.1214	0.397983	0.0359
TZDs	SLC29A1+RXRB+PPARG	All OC (Histology Unadjusted)	IVW(FE)	58	-0.161829	-0.767986	0.135791	0.233361	0.851(0.652-1.11)	0.877132	59.1214	0.397983	0.0359
TZDs	SLC29A1+RXRB+PPARG	All OC (Histology Unadjusted)	Weighted median	58	0.0830504	0.39413	0.197173	0.673604	1.087(0.738-1.6)	0.877132	59.1214	0.397983	0.0359
TZDs	SLC29A1+RXRB+PPARG	All OC (Histology Unadjusted)	Weighted mode	58	0.178878	0.848899	0.309064	0.565021	1.196(0.662-2.159)	0.877132	59.1214	0.397983	0.0359
TZDs	SLC29A1+RXRB+PPARG	All OC (Histology Adjusted)	IVW(MRE)	57	0.0533123	0.253003	0.154995	0.730876	1.055(0.778-1.429)	0.807529	71.7859	0.0760043	0.2199
TZDs	SLC29A1+RXRB+PPARG	All OC (Histology Adjusted)	IVW(FE)	57	0.0533123	0.253003	0.136897	0.696955	1.055(0.807-1.379)	0.807529	71.7859	0.0760043	0.2199
TZDs	SLC29A1+RXRB+PPARG	All OC (Histology Adjusted)	Weighted median	57	0.233599	1.10858	0.205974	0.256745	1.263(0.831-1.92)	0.807529	71.7859	0.0760043	0.2199
TZDs	SLC29A1+RXRB+PPARG	All OC (Histology Adjusted)	Weighted mode	57	0.385947	1.83158	0.309811	0.218043	1.471(0.821-2.637)	0.807529	71.7859	0.0760043	0.2199
DDP4i	HMGCR+ITGAL	All OC	IVW(MRE)	9	-0.0635796	-0.218355	0.197304	0.747269	0.938(0.637-1.381)	0.196504	4.26944	0.832033	0
DDP4i	HMGCR+ITGAL	All OC	IVW(FE)	9	-0.0635796	-0.218355	0.270081	0.813891	0.938(0.553-1.593)	0.196504	4.26944	0.832033	0
DDP4i	HMGCR+ITGAL	All OC	Weighted median	9	-0.121905	-0.418663	0.331928	0.713424	0.885(0.456-1.717)	0.196504	4.26944	0.832033	0
DDP4i	HMGCR+ITGAL	All OC	Weighted mode	9	-0.0980108	-0.336603	0.421592	0.822004	0.907(0.398-2.066)	0.196504	4.26944	0.832033	0
DDP4i	HMGCR+ITGAL	HGSOC	IVW(MRE)	9	0.36615	1.25749	0.299223	0.221078	1.442(0.802-2.593)	0.25419	6.92165	0.54511	0
DDP4i	HMGCR+ITGAL	HGSOC	IVW(FE)	9	0.36615	1.25749	0.321689	0.255033	1.442(0.768-2.709)	0.25419	6.92165	0.54511	0
DDP4i	HMGCR+ITGAL	HGSOC	Weighted median	9	0.281873	0.968052	0.409291	0.49102	1.326(0.596-2.95)	0.25419	6.92165	0.54511	0
DDP4i	HMGCR+ITGAL	HGSOC	Weighted mode	9	0.425525	1.4614	0.471201	0.39287	1.53(0.572-4.096)	0.25419	6.92165	0.54511	0
DDP4i	HMGCR+ITGAL	LGSOC	IVW(MRE)	9	0.907305	3.11601	0.804389	0.259344	2.478(0.512-11.988)	0.501169	5.34837	0.719775	0
DDP4i	HMGCR+ITGAL	LGSOC	IVW(FE)	9	0.907305	3.11601	0.983786	0.356394	2.478(0.36-17.039)	0.501169	5.34837	0.719775	0
DDP4i	HMGCR+ITGAL	LGSOC	Weighted median	9	0.864976	2.97063	1.21342	0.475944	2.375(0.197-28.568)	0.501169	5.34837	0.719775	0
DDP4i	HMGCR+ITGAL	LGSOC	Weighted mode	9	1.0917	3.74929	1.44202	0.47072	2.979(0.126-70.225)	0.501169	5.34837	0.719775	0
DDP4i	HMGCR+ITGAL	Clear cell OC	IVW(MRE)	9	0.825655	2.83559	0.858263	0.336046	2.283(0.425-12.279)	0.631732	8.78729	0.360557	0.0896
DDP4i	HMGCR+ITGAL	Clear cell OC	IVW(FE)	9	0.825655	2.83559	0.818913	0.313343	2.283(0.459-11.367)	0.631732	8.78729	0.360557	0.0896
DDP4i	HMGCR+ITGAL	Clear cell OC	Weighted median	9	0.491	1.68627	1.0367	0.635772	1.634(0.202-13.249)	0.631732	8.78729	0.360557	0.0896
DDP4i	HMGCR+ITGAL	Clear cell OC	Weighted mode	9	0.497015	1.70693	1.33291	0.718923	1.644(0.123-22.018)	0.631732	8.78729	0.360557	0.0896
DDP4i	HMGCR+ITGAL	Mucinous OC	IVW(MRE)	9	-1.96342	-6.74307	0.31253	3.34e-10	0.14(0.076-0.259)	0.742922	2.11377	0.977324	0
DDP4i	HMGCR+ITGAL	Mucinous OC	IVW(FE)	9	-1.96342	-6.74307	0.608007	0.00124105	0.14(0.043-0.462)	0.742922	2.11377	0.977324	0
DDP4i	HMGCR+ITGAL	Mucinous OC	Weighted median	9	-1.79884	-6.17785	0.775394	0.0203461	0.165(0.037-0.746)	0.742922	2.11377	0.977324	0
DDP4i	HMGCR+ITGAL	Mucinous OC	Weighted mode	9	-1.71524	-5.89073	1.00536	0.126382	0.18(0.028-1.166)	0.742922	2.11377	0.977324	0
DDP4i	HMGCR+ITGAL	Endometrioid OC	IVW(MRE)	9	-3.07206	-10.5505	0.886931	0.000532816	0.046(0.008-0.264)	0.122622	18.8449	0.0157116	0.5755
DDP4i	HMGCR+ITGAL	Endometrioid OC	IVW(FE)	9	-3.07206	-10.5505	0.577881	1.06e-07	0.046(0.015-0.144)	0.122622	18.8449	0.0157116	0.5755
DDP4i	HMGCR+ITGAL	Endometrioid OC	Weighted median	9	-3.54866	-12.1874	0.750274	2.25e-06	0.029(0.006-0.129)	0.122622	18.8449	0.0157116	0.5755
DDP4i	HMGCR+ITGAL	Endometrioid OC	Weighted mode	9	-3.7204	-12.7772	0.852162	0.0023938	0.024(0.005-0.124)	0.122622	18.8449	0.0157116	0.5755
DDP4i	HMGCR+ITGAL	HGSOC (survival)	IVW(MRE)	8	-0.34617	-1.18887	0.274162	0.206716	0.707(0.413-1.211)	0.688221	2.56365	0.922229	0
DDP4i	HMGCR+ITGAL	HGSOC (survival)	IVW(FE)	8	-0.34617	-1.18887	0.453031	0.444795	0.707(0.291-1.719)	0.688221	2.56365	0.922229	0
DDP4i	HMGCR+ITGAL	HGSOC (survival)	Weighted median	8	-0.400258	-1.37463	0.567738	0.480807	0.67(0.216-2.076)	0.688221	2.56365	0.922229	0
DDP4i	HMGCR+ITGAL	HGSOC (survival)	Weighted mode	8	-0.509082	-1.74837	0.760661	0.524779	0.601(0.139-2.605)	0.688221	2.56365	0.922229	0
DDP4i	HMGCR+ITGAL	All OC (Histology Unadjusted)	IVW(MRE)	8	0.0804396	0.276258	0.324467	0.804202	1.084(0.574-2.047)	0.633046	5.0175	0.657827	0
DDP4i	HMGCR+ITGAL	All OC (Histology Unadjusted)	IVW(FE)	8	0.0804396	0.276258	0.383245	0.833753	1.084(0.511-2.297)	0.633046	5.0175	0.657827	0
DDP4i	HMGCR+ITGAL	All OC (Histology Unadjusted)	Weighted median	8	0.0317585	0.10907	0.500601	0.949416	1.032(0.396-2.689)	0.633046	5.0175	0.657827	0
DDP4i	HMGCR+ITGAL	All OC (Histology Unadjusted)	Weighted mode	8	-0.054089	-0.185761	0.577379	0.927988	0.947(0.291-3.079)	0.633046	5.0175	0.657827	0
DDP4i	HMGCR+ITGAL	All OC (Histology Adjusted)	IVW(MRE)	8	-0.119614	-0.410798	0.257972	0.642883	0.887(0.535-1.471)	0.645817	3.13652	0.872092	0
DDP4i	HMGCR+ITGAL	All OC (Histology Adjusted)	IVW(FE)	8	-0.119614	-0.410798	0.385387	0.756276	0.887(0.417-1.888)	0.645817	3.13652	0.872092	0
DDP4i	HMGCR+ITGAL	All OC (Histology Adjusted)	Weighted median	8	-0.0350544	-0.120389	0.494952	0.943538	0.966(0.364-2.564)	0.645817	3.13652	0.872092	0
DDP4i	HMGCR+ITGAL	All OC (Histology Adjusted)	Weighted mode	8	-0.102923	-0.353473	0.611873	0.871176	0.902(0.255-3.194)	0.645817	3.13652	0.872092	0
SGLT2i	SLC5A1+SLC5A2	All OC	IVW(MRE)	21	0.346007	1.21585	0.153385	0.024083	1.413(1.046-1.909)	0.319017	11.2974	0.938143	0
SGLT2i	SLC5A1+SLC5A2	All OC	IVW(FE)	21	0.346007	1.21585	0.204085	0.0899977	1.413(0.947-2.109)	0.319017	11.2974	0.938143	0
SGLT2i	SLC5A1+SLC5A2	All OC	Weighted median	21	0.382533	1.3442	0.279566	0.171216	1.466(0.855-2.512)	0.319017	11.2974	0.938143	0
SGLT2i	SLC5A1+SLC5A2	All OC	Weighted mode	21	0.573648	2.01577	0.480428	0.246435	1.775(0.737-4.274)	0.319017	11.2974	0.938143	0
SGLT2i	SLC5A1+SLC5A2	HGSOC	IVW(MRE)	21	0.701793	2.46607	0.256259	0.00616999	2.017(1.221-3.334)	0.391256	22.2569	0.326737	0.1014
SGLT2i	SLC5A1+SLC5A2	HGSOC	IVW(FE)	21	0.701793	2.46607	0.242919	0.00386475	2.017(1.253-3.248)	0.391256	22.2569	0.326737	0.1014
SGLT2i	SLC5A1+SLC5A2	HGSOC	Weighted median	21	1.01449	3.56487	0.36544	0.00550185	2.758(1.354-5.617)	0.391256	22.2569	0.326737	0.1014
SGLT2i	SLC5A1+SLC5A2	HGSOC	Weighted mode	21	1.16136	4.08095	0.556523	0.0499161	3.194(1.117-9.131)	0.391256	22.2569	0.326737	0.1014
SGLT2i	SLC5A1+SLC5A2	LGSOC	IVW(MRE)	21	0.547765	1.92482	0.814315	0.501158	1.729(0.351-8.532)	0.541684	25.0416	0.199845	0.2013
SGLT2i	SLC5A1+SLC5A2	LGSOC	IVW(FE)	21	0.547765	1.92482	0.72774	0.451635	1.729(0.415-7.2)	0.541684	25.0416	0.199845	0.2013
SGLT2i	SLC5A1+SLC5A2	LGSOC	Weighted median	21	1.012	3.55613	1.08137	0.349351	2.751(0.31-24.38)	0.541684	25.0416	0.199845	0.2013
SGLT2i	SLC5A1+SLC5A2	LGSOC	Weighted mode	21	1.38464	4.86555	2.43536	0.575986	3.993(0.029-553.252)	0.541684	25.0416	0.199845	0.2013
SGLT2i	SLC5A1+SLC5A2	Clear cell OC	IVW(MRE)	21	0.212232	0.745772	0.42388	0.616591	1.236(0.539-2.838)	0.255892	9.44594	0.977143	0
SGLT2i	SLC5A1+SLC5A2	Clear cell OC	IVW(FE)	21	0.212232	0.745772	0.616788	0.730777	1.236(0.369-4.142)	0.255892	9.44594	0.977143	0
SGLT2i	SLC5A1+SLC5A2	Clear cell OC	Weighted median	21	0.344396	1.21019	0.841485	0.682341	1.411(0.281-7.089)	0.255892	9.44594	0.977143	0
SGLT2i	SLC5A1+SLC5A2	Clear cell OC	Weighted mode	21	0.124111	0.43612	1.30728	0.925309	1.132(0.086-14.968)	0.255892	9.44594	0.977143	0
SGLT2i	SLC5A1+SLC5A2	Mucinous OC	IVW(MRE)	21	-0.259556	-0.912066	0.586045	0.657842	0.771(0.245-2.433)	0.137734	32.1095	0.042145	0.3771
SGLT2i	SLC5A1+SLC5A2	Mucinous OC	IVW(FE)	21	-0.259556	-0.912066	0.462518	0.574675	0.771(0.312-1.91)	0.137734	32.1095	0.042145	0.3771
SGLT2i	SLC5A1+SLC5A2	Mucinous OC	Weighted median	21	0.494677	1.73827	0.708621	0.485124	1.64(0.423-6.351)	0.137734	32.1095	0.042145	0.3771
SGLT2i	SLC5A1+SLC5A2	Mucinous OC	Weighted mode	21	0.69964	2.4585	1.00254	0.493293	2.013(0.267-15.188)	0.137734	32.1095	0.042145	0.3771
SGLT2i	SLC5A1+SLC5A2	Endometrioid OC	IVW(MRE)	21	-0.682207	-2.39724	0.448137	0.127929	0.506(0.21-1.217)	0.0174735	20.5671	0.422995	0.0276
SGLT2i	SLC5A1+SLC5A2	Endometrioid OC	IVW(FE)	21	-0.682207	-2.39724	0.441915	0.122649	0.506(0.213-1.202)	0.0174735	20.5671	0.422995	0.0276
SGLT2i	SLC5A1+SLC5A2	Endometrioid OC	Weighted median	21	-0.0969319	-0.340614	0.629918	0.877704	0.908(0.262-3.141)	0.0174735	20.5671	0.422995	0.0276
SGLT2i	SLC5A1+SLC5A2	Endometrioid OC	Weighted mode	21	0.12372	0.434748	0.868096	0.888096	1.132(0.195-6.582)	0.0174735	20.5671	0.422995	0.0276
SGLT2i	SLC5A1+SLC5A2	HGSOC (survival)	IVW(MRE)	19	0.0709519	0.249321	0.256497	0.782073	1.074(0.649-1.775)	0.10273	11.1176	0.889299	0
SGLT2i	SLC5A1+SLC5A2	HGSOC (survival)	IVW(FE)	19	0.0709519	0.249321	0.326372	0.8279	1.074(0.566-2.035)	0.10273	11.1176	0.889299	0
SGLT2i	SLC5A1+SLC5A2	HGSOC (survival)	Weighted median	19	0.29396	1.03296	0.447151	0.510919	1.342(0.577-3.119)	0.10273	11.1176	0.889299	0
SGLT2i	SLC5A1+SLC5A2	HGSOC (survival)	Weighted mode	19	0.39703	1.39514	0.646569	0.546861	1.487(0.431-5.132)	0.10273	11.1176	0.889299	0
SGLT2i	SLC5A1+SLC5A2	All OC (Histology Unadjusted)	IVW(MRE)	18	0.298327	1.0483	0.182328	0.101796	1.348(0.943-1.926)	0.265545	7.08468	0.982426	0
SGLT2i	SLC5A1+SLC5A2	All OC (Histology Unadjusted)	IVW(FE)	18	0.298327	1.0483	0.282434	0.290845	1.348(0.775-2.344)	0.265545	7.08468	0.982426	0
SGLT2i	SLC5A1+SLC5A2	All OC (Histology Unadjusted)	Weighted median	18	0.418999	1.47234	0.376249	0.265442	1.52(0.753-3.071)	0.265545	7.08468	0.982426	0
SGLT2i	SLC5A1+SLC5A2	All OC (Histology Unadjusted)	Weighted mode	18	0.47564	1.67138	0.521436	0.374432	1.609(0.582-4.448)	0.265545	7.08468	0.982426	0
SGLT2i	SLC5A1+SLC5A2	All OC (Histology Adjusted)	IVW(MRE)	20	0.130053	0.456999	0.206723	0.529273	1.139(0.759-1.708)	0.538777	10.8822	0.927736	0
SGLT2i	SLC5A1+SLC5A2	All OC (Histology Adjusted)	IVW(FE)	20	0.130053	0.456999	0.273153	0.633991	1.139(0.667-1.945)	0.538777	10.8822	0.927736	0
SGLT2i	SLC5A1+SLC5A2	All OC (Histology Adjusted)	Weighted median	20	0.324837	1.14146	0.372235	0.382845	1.384(0.652-2.937)	0.538777	10.8822	0.927736	0
SGLT2i	SLC5A1+SLC5A2	All OC (Histology Adjusted)	Weighted mode	20	0.426919	1.50017	0.539053	0.438149	1.533(0.519-4.525)	0.538777	10.8822	0.927736	0
This table displays the Mendelian Randomization (MR) results of drug targets on various ovarian cancer(OC) phenotypes using different methods and tests. Each row represents a different OC phenotype such as All OC, HGSOC, LGSOC, Clear cell OC, Mucinous OC, Endometrioid OC, HGSOC (survival), among others, and shows results from different statistical methods including weighted median and inverse var…

## Sheet: Table S7
MR results in replication analysis
Exposure	Exposure ID	Target_Gene	Drugs	outcome	method	Nsnp	beta	se	pval	OR(95%CI)
HbA1c	ieu-b-4842	PPARG	Sulfonylureas/TZDs	All OC	Wald ratio	1	0.358209	0.331343	0.279661	1.431(0.747-2.739)
HbA1c	ieu-b-4842	PPARG	Sulfonylureas/TZDs	HGSOC	Wald ratio	1	0.310945	0.394279	0.43032	1.365(0.63-2.956)
HbA1c	ieu-b-4842	PPARG	Sulfonylureas/TZDs	LGSOC	Wald ratio	1	-1.12711	1.20025	0.347696	0.324(0.031-3.405)
HbA1c	ieu-b-4842	PPARG	Sulfonylureas/TZDs	Clear cell OC	Wald ratio	1	0.540547	1.00448	0.590482	1.717(0.24-12.297)
HbA1c	ieu-b-4842	PPARG	Sulfonylureas/TZDs	Mucinous OC	Wald ratio	1	0.154826	0.750746	0.836612	1.167(0.268-5.085)
HbA1c	ieu-b-4842	PPARG	Sulfonylureas/TZDs	Endometrioid All OC	Wald ratio	1	0.633831	0.718408	0.37763	1.885(0.461-7.705)
HbA1c	ieu-b-4842	PPARG	Sulfonylureas/TZDs	HGSOC (Survival)	Wald ratio	1	-0.41791	0.517413	0.419268	0.658(0.239-1.815)
HbA1c	ieu-b-4842	PPARG	Sulfonylureas/TZDs	All OC (Histology Unadjusted)	Wald ratio	1	-0.649254	0.437313	0.137639	0.522(0.222-1.231)
HbA1c	ieu-b-4842	PPARG	Sulfonylureas/TZDs	All OC (Histology Adjusted)	Wald ratio	1	-0.554478	0.439801	0.2074	0.574(0.243-1.36)
HbA1c	ieu-b-4842	GCK	Other drugs	All OC	Inverse variance weighted (multiplicative random effects)	2	-0.151673	0.133388	0.255505	0.859(0.662-1.116)
HbA1c	ieu-b-4842	GCK	Other drugs	All OC	Inverse variance weighted (fixed effects)	2	-0.151673	0.121573	0.212182	0.859(0.677-1.09)
HbA1c	ieu-b-4842	GCK	Other drugs	HGSOC	Inverse variance weighted (multiplicative random effects)	2	-0.344147	0.111916	0.00210474	0.709(0.569-0.883)
HbA1c	ieu-b-4842	GCK	Other drugs	HGSOC	Inverse variance weighted (fixed effects)	2	-0.344147	0.14409	0.0169207	0.709(0.534-0.94)
HbA1c	ieu-b-4842	GCK	Other drugs	LGSOC	Inverse variance weighted (multiplicative random effects)	2	0.566713	0.150372	0.000164073	1.762(1.313-2.367)
HbA1c	ieu-b-4842	GCK	Other drugs	LGSOC	Inverse variance weighted (fixed effects)	2	0.566713	0.43569	0.193353	1.762(0.75-4.14)
HbA1c	ieu-b-4842	GCK	Other drugs	Clear cell OC	Inverse variance weighted (multiplicative random effects)	2	0.32114	0.202428	0.11264	1.379(0.927-2.05)
HbA1c	ieu-b-4842	GCK	Other drugs	Clear cell OC	Inverse variance weighted (fixed effects)	2	0.32114	0.367931	0.382757	1.379(0.67-2.836)
HbA1c	ieu-b-4842	GCK	Other drugs	Mucinous OC	Inverse variance weighted (multiplicative random effects)	2	-0.512541	0.0959511	9.21e-08	0.599(0.496-0.723)
HbA1c	ieu-b-4842	GCK	Other drugs	Mucinous OC	Inverse variance weighted (fixed effects)	2	-0.512541	0.274309	0.061695	0.599(0.35-1.025)
HbA1c	ieu-b-4842	GCK	Other drugs	Endometrioid All OC	Inverse variance weighted (multiplicative random effects)	2	0.196259	0.241311	0.416045	1.217(0.758-1.953)
HbA1c	ieu-b-4842	GCK	Other drugs	Endometrioid All OC	Inverse variance weighted (fixed effects)	2	0.196259	0.264804	0.458604	1.217(0.724-2.045)
HbA1c	ieu-b-4842	GCK	Other drugs	HGSOC (Survival)	Wald ratio	1	-0.420795	0.229495	0.0667173	0.657(0.419-1.029)
HbA1c	ieu-b-4842	GCK	Other drugs	All OC (Histology Unadjusted)	Wald ratio	1	-0.319967	0.195278	0.101313	0.726(0.495-1.065)
HbA1c	ieu-b-4842	GCK	Other drugs	All OC (Histology Adjusted)	Inverse variance weighted (multiplicative random effects)	2	-0.15327	0.248917	0.538061	0.858(0.527-1.397)
HbA1c	ieu-b-4842	GCK	Other drugs	All OC (Histology Adjusted)	Inverse variance weighted (fixed effects)	2	-0.15327	0.159487	0.336542	0.858(0.628-1.173)
HbA1c	ieu-b-103	GCK	Other drugs	All OC	Inverse variance weighted (multiplicative random effects)	3	-0.355096	0.303739	0.24237	0.701(0.387-1.272)
HbA1c	ieu-b-103	GCK	Other drugs	All OC	Inverse variance weighted (fixed effects)	3	-0.355096	0.315843	0.260895	0.701(0.378-1.302)
HbA1c	ieu-b-103	GCK	Other drugs	All OC	Weighted median	3	-0.239285	0.377406	0.526064	0.787(0.376-1.649)
HbA1c	ieu-b-103	GCK	Other drugs	All OC	Weighted mode	3	-0.088877	0.510606	0.877842	0.915(0.336-2.489)
HbA1c	ieu-b-103	GCK	Other drugs	HGSOC	Inverse variance weighted (multiplicative random effects)	3	-0.859048	0.180753	2.01e-06	0.424(0.297-0.604)
HbA1c	ieu-b-103	GCK	Other drugs	HGSOC	Inverse variance weighted (fixed effects)	3	-0.859048	0.374556	0.0218187	0.424(0.203-0.883)
HbA1c	ieu-b-103	GCK	Other drugs	HGSOC	Weighted median	3	-0.889182	0.426347	0.0370163	0.411(0.178-0.948)
HbA1c	ieu-b-103	GCK	Other drugs	HGSOC	Weighted mode	3	-0.926001	0.496349	0.203085	0.396(0.15-1.048)
HbA1c	ieu-b-103	GCK	Other drugs	LGSOC	Inverse variance weighted (multiplicative random effects)	3	1.42646	1.21711	0.241195	4.164(0.383-45.241)
HbA1c	ieu-b-103	GCK	Other drugs	LGSOC	Inverse variance weighted (fixed effects)	3	1.42646	1.1399	0.210791	4.164(0.446-38.887)
HbA1c	ieu-b-103	GCK	Other drugs	LGSOC	Weighted median	3	2.07686	1.42665	0.14546	7.979(0.487-130.725)
HbA1c	ieu-b-103	GCK	Other drugs	LGSOC	Weighted mode	3	2.62487	1.81097	0.284252	13.803(0.397-480.279)
HbA1c	ieu-b-103	GCK	Other drugs	Clear cell OC	Inverse variance weighted (multiplicative random effects)	3	0.0402808	0.853539	0.96236	1.041(0.195-5.547)
HbA1c	ieu-b-103	GCK	Other drugs	Clear cell OC	Inverse variance weighted (fixed effects)	3	0.0402808	0.952703	0.966275	1.041(0.161-6.737)
HbA1c	ieu-b-103	GCK	Other drugs	Clear cell OC	Weighted median	3	-0.246872	1.08447	0.819923	0.781(0.093-6.545)
HbA1c	ieu-b-103	GCK	Other drugs	Clear cell OC	Weighted mode	3	-0.984847	1.54657	0.589421	0.373(0.018-7.74)
HbA1c	ieu-b-103	GCK	Other drugs	Mucinous OC	Inverse variance weighted (multiplicative random effects)	3	-1.63415	0.462083	0.000405485	0.195(0.079-0.483)
HbA1c	ieu-b-103	GCK	Other drugs	Mucinous OC	Inverse variance weighted (fixed effects)	3	-1.63415	0.713857	0.0220685	0.195(0.048-0.791)
HbA1c	ieu-b-103	GCK	Other drugs	Mucinous OC	Weighted median	3	-1.46379	0.82378	0.0755808	0.231(0.046-1.163)
HbA1c	ieu-b-103	GCK	Other drugs	Mucinous OC	Weighted mode	3	-1.24923	1.04653	0.354991	0.287(0.037-2.23)
HbA1c	ieu-b-103	GCK	Other drugs	Endometrioid All OC	Inverse variance weighted (multiplicative random effects)	3	1.38384	0.691479	0.0453633	3.99(1.029-15.474)
HbA1c	ieu-b-103	GCK	Other drugs	Endometrioid All OC	Inverse variance weighted (fixed effects)	3	1.38384	0.688282	0.0443715	3.99(1.035-15.377)
HbA1c	ieu-b-103	GCK	Other drugs	Endometrioid All OC	Weighted median	3	1.0284	0.881904	0.243568	2.797(0.497-15.751)
HbA1c	ieu-b-103	GCK	Other drugs	Endometrioid All OC	Weighted mode	3	0.883903	0.930535	0.442427	2.42(0.391-14.996)
HbA1c	ieu-b-103	GCK	Other drugs	HGSOC (Survival)	Inverse variance weighted (multiplicative random effects)	3	-0.985385	0.184206	8.83e-08	0.373(0.26-0.536)
HbA1c	ieu-b-103	GCK	Other drugs	HGSOC (Survival)	Inverse variance weighted (fixed effects)	3	-0.985385	0.485367	0.0423377	0.373(0.144-0.967)
HbA1c	ieu-b-103	GCK	Other drugs	HGSOC (Survival)	Weighted median	3	-0.872358	0.538697	0.105365	0.418(0.145-1.201)
HbA1c	ieu-b-103	GCK	Other drugs	HGSOC (Survival)	Weighted mode	3	-0.753124	0.689416	0.38869	0.471(0.122-1.819)
HbA1c	ieu-b-103	GCK	Other drugs	All OC (Histology Unadjusted)	Inverse variance weighted (multiplicative random effects)	3	-0.336558	0.407505	0.408861	0.714(0.321-1.587)
HbA1c	ieu-b-103	GCK	Other drugs	All OC (Histology Unadjusted)	Inverse variance weighted (fixed effects)	3	-0.336558	0.413689	0.415901	0.714(0.317-1.607)
HbA1c	ieu-b-103	GCK	Other drugs	All OC (Histology Unadjusted)	Weighted median	3	-0.388523	0.492252	0.429951	0.678(0.258-1.779)
HbA1c	ieu-b-103	GCK	Other drugs	All OC (Histology Unadjusted)	Weighted mode	3	-0.667814	0.719245	0.451172	0.513(0.125-2.1)
HbA1c	ieu-b-103	GCK	Other drugs	All OC (Histology Adjusted)	Inverse variance weighted (multiplicative random effects)	3	-0.440094	0.344353	0.201238	0.644(0.328-1.265)
HbA1c	ieu-b-103	GCK	Other drugs	All OC (Histology Adjusted)	Inverse variance weighted (fixed effects)	3	-0.440094	0.415399	0.289396	0.644(0.285-1.454)
HbA1c	ieu-b-103	GCK	Other drugs	All OC (Histology Adjusted)	Weighted median	3	-0.390695	0.490935	0.426138	0.677(0.258-1.771)
HbA1c	ieu-b-103	GCK	Other drugs	All OC (Histology Adjusted)	Weighted mode	3	-0.173792	0.671189	0.819902	0.84(0.226-3.132)
Type 2 diabetes	ieu-a-23	ABCC8/KCNJ11	Sulfonylureas	All OC	Wald ratio	1	0.219198	0.158742	0.167326	1.245(0.912-1.699)
Type 2 diabetes	ieu-a-23	ABCC8/KCNJ11	Sulfonylureas	HGSOC	Wald ratio	1	0.215717	0.188332	0.252039	1.241(0.858-1.795)
Type 2 diabetes	ieu-a-23	ABCC8/KCNJ11	Sulfonylureas	LGSOC	Wald ratio	1	0.0520436	0.571726	0.92747	1.053(0.344-3.23)
Type 2 diabetes	ieu-a-23	ABCC8/KCNJ11	Sulfonylureas	Clear cell OC	Wald ratio	1	0.742535	0.481447	0.123001	2.101(0.818-5.399)
Type 2 diabetes	ieu-a-23	ABCC8/KCNJ11	Sulfonylureas	Mucinous OC	Wald ratio	1	-0.145861	0.356473	0.682408	0.864(0.43-1.738)
Type 2 diabetes	ieu-a-23	ABCC8/KCNJ11	Sulfonylureas	Endometrioid All OC	Wald ratio	1	0.426793	0.342896	0.213253	1.532(0.782-3.001)
Type 2 diabetes	ieu-a-23	ABCC8/KCNJ11	Sulfonylureas	HGSOC (Survival)	Wald ratio	1	0.0716079	0.24786	0.772654	1.074(0.661-1.746)
Type 2 diabetes	ieu-a-23	ABCC8/KCNJ11	Sulfonylureas	All OC (Histology Unadjusted)	Wald ratio	1	0.034394	0.21154	0.870842	1.035(0.684-1.567)
Type 2 diabetes	ieu-a-23	ABCC8/KCNJ11	Sulfonylureas	All OC (Histology Adjusted)	Wald ratio	1	-0.00132633	0.211888	0.995006	0.999(0.659-1.513)
Type 2 diabetes	ieu-a-23	PPARG	Sulfonylureas/TZDs	All OC	Inverse variance weighted (multiplicative random effects)	2	-0.0619775	0.0133022	3.17e-06	0.94(0.916-0.965)
Type 2 diabetes	ieu-a-23	PPARG	Sulfonylureas/TZDs	All OC	Inverse variance weighted (fixed effects)	2	-0.0619775	0.106837	0.561838	0.94(0.762-1.159)
Type 2 diabetes	ieu-a-23	PPARG	Sulfonylureas/TZDs	HGSOC	Inverse variance weighted (multiplicative random effects)	2	0.024352	0.0936781	0.794899	1.025(0.853-1.231)
Type 2 diabetes	ieu-a-23	PPARG	Sulfonylureas/TZDs	HGSOC	Inverse variance weighted (fixed effects)	2	0.024352	0.126935	0.847862	1.025(0.799-1.314)
Type 2 diabetes	ieu-a-23	PPARG	Sulfonylureas/TZDs	LGSOC	Inverse variance weighted (multiplicative random effects)	2	-0.05275	0.000839127	0	0.949(0.947-0.95)
Type 2 diabetes	ieu-a-23	PPARG	Sulfonylureas/TZDs	LGSOC	Inverse variance weighted (fixed effects)	2	-0.05275	0.388906	0.892108	0.949(0.443-2.033)
Type 2 diabetes	ieu-a-23	PPARG	Sulfonylureas/TZDs	Clear cell OC	Inverse variance weighted (multiplicative random effects)	2	-0.0546152	0.292688	0.851975	0.947(0.534-1.68)
Type 2 diabetes	ieu-a-23	PPARG	Sulfonylureas/TZDs	Clear cell OC	Inverse variance weighted (fixed effects)	2	-0.0546152	0.324612	0.866388	0.947(0.501-1.789)
Type 2 diabetes	ieu-a-23	PPARG	Sulfonylureas/TZDs	Mucinous OC	Inverse variance weighted (multiplicative random effects)	2	-0.405628	0.0106959	0	0.667(0.653-0.681)
Type 2 diabetes	ieu-a-23	PPARG	Sulfonylureas/TZDs	Mucinous OC	Inverse variance weighted (fixed effects)	2	-0.405628	0.244487	0.0970957	0.667(0.413-1.076)
Type 2 diabetes	ieu-a-23	PPARG	Sulfonylureas/TZDs	Endometrioid All OC	Inverse variance weighted (multiplicative random effects)	2	-0.529954	0.162419	0.00110284	0.589(0.428-0.809)
Type 2 diabetes	ieu-a-23	PPARG	Sulfonylureas/TZDs	Endometrioid All OC	Inverse variance weighted (fixed effects)	2	-0.529954	0.235357	0.0243412	0.589(0.371-0.934)
Type 2 diabetes	ieu-a-23	PPARG	Sulfonylureas/TZDs	HGSOC (Survival)	Inverse variance weighted (multiplicative random effects)	2	0.462833	0.241321	0.0551221	1.589(0.99-2.549)
Type 2 diabetes	ieu-a-23	PPARG	Sulfonylureas/TZDs	HGSOC (Survival)	Inverse variance weighted (fixed effects)	2	0.462833	0.1626	0.00442101	1.589(1.155-2.185)
Type 2 diabetes	ieu-a-23	PPARG	Sulfonylureas/TZDs	All OC (Histology Unadjusted)	Inverse variance weighted (multiplicative random effects)	2	0.414987	0.187228	0.0266591	1.514(1.049-2.186)
Type 2 diabetes	ieu-a-23	PPARG	Sulfonylureas/TZDs	All OC (Histology Unadjusted)	Inverse variance weighted (fixed effects)	2	0.414987	0.139099	0.00285081	1.514(1.153-1.989)
Type 2 diabetes	ieu-a-23	PPARG	Sulfonylureas/TZDs	All OC (Histology Adjusted)	Inverse variance weighted (multiplicative random effects)	2	0.341714	0.169932	0.0443379	1.407(1.009-1.964)
Type 2 diabetes	ieu-a-23	PPARG	Sulfonylureas/TZDs	All OC (Histology Adjusted)	Inverse variance weighted (fixed effects)	2	0.341714	0.139351	0.0141994	1.407(1.071-1.849)
Type 2 diabetes	finn-b-E4_DM2_STRICT	ABCC8/KCNJ11	Sulfonylureas	All OC	Wald ratio	1	0.30517	0.221002	0.167326	1.357(0.88-2.092)
Type 2 diabetes	finn-b-E4_DM2_STRICT	ABCC8/KCNJ11	Sulfonylureas	HGSOC	Wald ratio	1	0.300323	0.262197	0.252039	1.35(0.808-2.257)
Type 2 diabetes	finn-b-E4_DM2_STRICT	ABCC8/KCNJ11	Sulfonylureas	LGSOC	Wald ratio	1	0.0724556	0.795961	0.92747	1.075(0.226-5.117)
Type 2 diabetes	finn-b-E4_DM2_STRICT	ABCC8/KCNJ11	Sulfonylureas	Clear cell OC	Wald ratio	1	1.03376	0.670275	0.123001	2.812(0.756-10.459)
Type 2 diabetes	finn-b-E4_DM2_STRICT	ABCC8/KCNJ11	Sulfonylureas	Mucinous OC	Wald ratio	1	-0.203069	0.496284	0.682408	0.816(0.309-2.159)
Type 2 diabetes	finn-b-E4_DM2_STRICT	ABCC8/KCNJ11	Sulfonylureas	Endometrioid All OC	Wald ratio	1	0.594184	0.477383	0.213253	1.812(0.711-4.618)
Type 2 diabetes	finn-b-E4_DM2_STRICT	ABCC8/KCNJ11	Sulfonylureas	HGSOC (Survival)	Wald ratio	1	0.0996931	0.345073	0.772654	1.105(0.562-2.173)
Type 2 diabetes	finn-b-E4_DM2_STRICT	ABCC8/KCNJ11	Sulfonylureas	All OC (Histology Unadjusted)	Wald ratio	1	0.0478837	0.294507	0.870842	1.049(0.589-1.868)
Type 2 diabetes	finn-b-E4_DM2_STRICT	ABCC8/KCNJ11	Sulfonylureas	All OC (Histology Adjusted)	Wald ratio	1	-0.00184653	0.294992	0.995006	0.998(0.56-1.78)
Type 2 diabetes	finn-b-E4_DM2_STRICT	PPARG	Sulfonylureas/TZDs	All OC	Wald ratio	1	-0.00444969	0.211792	0.983238	0.996(0.657-1.508)
Type 2 diabetes	finn-b-E4_DM2_STRICT	PPARG	Sulfonylureas/TZDs	HGSOC	Wald ratio	1	0.0495283	0.251887	0.844118	1.051(0.641-1.722)
Type 2 diabetes	finn-b-E4_DM2_STRICT	PPARG	Sulfonylureas/TZDs	LGSOC	Wald ratio	1	-0.640252	0.760377	0.399778	0.527(0.119-2.34)
Type 2 diabetes	finn-b-E4_DM2_STRICT	PPARG	Sulfonylureas/TZDs	Clear cell OC	Wald ratio	1	-0.56761	0.645283	0.37906	0.567(0.16-2.008)
Type 2 diabetes	finn-b-E4_DM2_STRICT	PPARG	Sulfonylureas/TZDs	Mucinous OC	Wald ratio	1	-0.198113	0.480031	0.67982	0.82(0.32-2.102)
Type 2 diabetes	finn-b-E4_DM2_STRICT	PPARG	Sulfonylureas/TZDs	Endometrioid All OC	Wald ratio	1	0.391352	0.461006	0.395932	1.479(0.599-3.651)
Type 2 diabetes	finn-b-E4_DM2_STRICT	PPARG	Sulfonylureas/TZDs	HGSOC (Survival)	Wald ratio	1	0.22044	0.327358	0.500699	1.247(0.656-2.368)
Type 2 diabetes	finn-b-E4_DM2_STRICT	PPARG	Sulfonylureas/TZDs	All OC (Histology Unadjusted)	Wald ratio	1	-0.0267138	0.27783	0.9234	0.974(0.565-1.678)
Type 2 diabetes	finn-b-E4_DM2_STRICT	PPARG	Sulfonylureas/TZDs	All OC (Histology Adjusted)	Wald ratio	1	0.0731761	0.279088	0.793169	1.076(0.623-1.859)
Type 2 diabetes	finn-b-E4_DM2_STRICT	INS	Sulfonylureas	All OC	Wald ratio	1	0.271364	0.205909	0.187544	1.312(0.876-1.964)
Type 2 diabetes	finn-b-E4_DM2_STRICT	INS	Sulfonylureas	HGSOC	Wald ratio	1	0.213333	0.244545	0.383008	1.238(0.766-1.999)
Type 2 diabetes	finn-b-E4_DM2_STRICT	INS	Sulfonylureas	LGSOC	Wald ratio	1	1.16879	0.754848	0.121532	3.218(0.733-14.13)
Type 2 diabetes	finn-b-E4_DM2_STRICT	INS	Sulfonylureas	Clear cell OC	Wald ratio	1	0.700758	0.62803	0.264507	2.015(0.588-6.901)
Type 2 diabetes	finn-b-E4_DM2_STRICT	INS	Sulfonylureas	Mucinous OC	Wald ratio	1	-0.0329091	0.467273	0.943853	0.968(0.387-2.418)
Type 2 diabetes	finn-b-E4_DM2_STRICT	INS	Sulfonylureas	Endometrioid All OC	Wald ratio	1	-0.311667	0.44697	0.485622	0.732(0.305-1.758)
Type 2 diabetes	finn-b-E4_DM2_STRICT	INS	Sulfonylureas	HGSOC (Survival)	Wald ratio	1	0.674848	0.316515	0.0329969	1.964(1.056-3.652)
Type 2 diabetes	finn-b-E4_DM2_STRICT	INS	Sulfonylureas	All OC (Histology Unadjusted)	Wald ratio	1	0.656515	0.270758	0.0153196	1.928(1.134-3.278)
Type 2 diabetes	finn-b-E4_DM2_STRICT	INS	Sulfonylureas	All OC (Histology Adjusted)	Wald ratio	1	0.562576	0.271364	0.0381589	1.755(1.031-2.988)
Type 2 diabetes	finn-b-E4_DM2_STRICT	GCK	Other drugs	All OC	Inverse variance weighted (multiplicative random effects)	4	-0.128935	0.0316785	4.7e-05	0.879(0.826-0.935)
Type 2 diabetes	finn-b-E4_DM2_STRICT	GCK	Other drugs	All OC	Inverse variance weighted (fixed effects)	4	-0.128935	0.104117	0.21558	0.879(0.717-1.078)
Type 2 diabetes	finn-b-E4_DM2_STRICT	GCK	Other drugs	All OC	Weighted median	4	-0.128589	0.119986	0.283856	0.879(0.695-1.112)
Type 2 diabetes	finn-b-E4_DM2_STRICT	GCK	Other drugs	All OC	Weighted mode	4	-0.173642	0.151046	0.333645	0.841(0.625-1.13)
Type 2 diabetes	finn-b-E4_DM2_STRICT	GCK	Other drugs	HGSOC	Inverse variance weighted (multiplicative random effects)	4	-0.211466	0.0878218	0.0160445	0.809(0.681-0.961)
Type 2 diabetes	finn-b-E4_DM2_STRICT	GCK	Other drugs	HGSOC	Inverse variance weighted (fixed effects)	4	-0.211466	0.123657	0.0872472	0.809(0.635-1.031)
Type 2 diabetes	finn-b-E4_DM2_STRICT	GCK	Other drugs	HGSOC	Weighted median	4	-0.246894	0.149331	0.0982642	0.781(0.583-1.047)
Type 2 diabetes	finn-b-E4_DM2_STRICT	GCK	Other drugs	HGSOC	Weighted mode	4	-0.312734	0.211199	0.235254	0.731(0.484-1.107)
Type 2 diabetes	finn-b-E4_DM2_STRICT	GCK	Other drugs	LGSOC	Inverse variance weighted (multiplicative random effects)	4	0.126402	0.194514	0.515799	1.135(0.775-1.661)
Type 2 diabetes	finn-b-E4_DM2_STRICT	GCK	Other drugs	LGSOC	Inverse variance weighted (fixed effects)	4	0.126402	0.375428	0.736353	1.135(0.544-2.368)
Type 2 diabetes	finn-b-E4_DM2_STRICT	GCK	Other drugs	LGSOC	Weighted median	4	0.0545163	0.433041	0.899818	1.056(0.452-2.468)
Type 2 diabetes	finn-b-E4_DM2_STRICT	GCK	Other drugs	LGSOC	Weighted mode	4	0.0363557	0.548175	0.951294	1.037(0.354-3.037)
Type 2 diabetes	finn-b-E4_DM2_STRICT	GCK	Other drugs	Clear cell OC	Inverse variance weighted (multiplicative random effects)	4	-0.319034	0.235337	0.175211	0.727(0.458-1.153)
Type 2 diabetes	finn-b-E4_DM2_STRICT	GCK	Other drugs	Clear cell OC	Inverse variance weighted (fixed effects)	4	-0.319034	0.313922	0.309493	0.727(0.393-1.345)
Type 2 diabetes	finn-b-E4_DM2_STRICT	GCK	Other drugs	Clear cell OC	Weighted median	4	-0.287337	0.381827	0.451732	0.75(0.355-1.586)
Type 2 diabetes	finn-b-E4_DM2_STRICT	GCK	Other drugs	Clear cell OC	Weighted mode	4	0.0107128	0.528503	0.985101	1.011(0.359-2.848)
Type 2 diabetes	finn-b-E4_DM2_STRICT	GCK	Other drugs	Mucinous OC	Inverse variance weighted (multiplicative random effects)	4	-0.640455	0.199408	0.00131912	0.527(0.357-0.779)
Type 2 diabetes	finn-b-E4_DM2_STRICT	GCK	Other drugs	Mucinous OC	Inverse variance weighted (fixed effects)	4	-0.640455	0.236161	0.006689	0.527(0.332-0.837)
Type 2 diabetes	finn-b-E4_DM2_STRICT	GCK	Other drugs	Mucinous OC	Weighted median	4	-0.470659	0.31015	0.129135	0.625(0.34-1.147)
Type 2 diabetes	finn-b-E4_DM2_STRICT	GCK	Other drugs	Mucinous OC	Weighted mode	4	-0.408829	0.362671	0.341647	0.664(0.326-1.353)
Type 2 diabetes	finn-b-E4_DM2_STRICT	GCK	Other drugs	Endometrioid All OC	Inverse variance weighted (multiplicative random effects)	4	0.175406	0.202082	0.385399	1.192(0.802-1.771)
Type 2 diabetes	finn-b-E4_DM2_STRICT	GCK	Other drugs	Endometrioid All OC	Inverse variance weighted (fixed effects)	4	0.175406	0.225844	0.437355	1.192(0.765-1.855)
Type 2 diabetes	finn-b-E4_DM2_STRICT	GCK	Other drugs	Endometrioid All OC	Weighted median	4	0.0900868	0.260723	0.729698	1.094(0.656-1.824)
Type 2 diabetes	finn-b-E4_DM2_STRICT	GCK	Other drugs	Endometrioid All OC	Weighted mode	4	0.0682587	0.331888	0.850216	1.071(0.559-2.052)
Type 2 diabetes	finn-b-E4_DM2_STRICT	GCK	Other drugs	HGSOC (Survival)	Inverse variance weighted (multiplicative random effects)	4	-0.21524	0.0813461	0.00814547	0.806(0.688-0.946)
Type 2 diabetes	finn-b-E4_DM2_STRICT	GCK	Other drugs	HGSOC (Survival)	Inverse variance weighted (fixed effects)	4	-0.21524	0.161398	0.182336	0.806(0.588-1.106)
Type 2 diabetes	finn-b-E4_DM2_STRICT	GCK	Other drugs	HGSOC (Survival)	Weighted median	4	-0.266829	0.18437	0.147828	0.766(0.534-1.099)
Type 2 diabetes	finn-b-E4_DM2_STRICT	GCK	Other drugs	HGSOC (Survival)	Weighted mode	4	-0.292507	0.230772	0.294415	0.746(0.475-1.173)
Type 2 diabetes	finn-b-E4_DM2_STRICT	GCK	Other drugs	All OC (Histology Unadjusted)	Inverse variance weighted (multiplicative random effects)	4	-0.0976018	0.0907719	0.282266	0.907(0.759-1.084)
Type 2 diabetes	finn-b-E4_DM2_STRICT	GCK	Other drugs	All OC (Histology Unadjusted)	Inverse variance weighted (fixed effects)	4	-0.0976018	0.136772	0.475469	0.907(0.694-1.186)
Type 2 diabetes	finn-b-E4_DM2_STRICT	GCK	Other drugs	All OC (Histology Unadjusted)	Weighted median	4	-0.121597	0.161573	0.451701	0.886(0.645-1.215)
Type 2 diabetes	finn-b-E4_DM2_STRICT	GCK	Other drugs	All OC (Histology Unadjusted)	Weighted mode	4	-0.136767	0.206886	0.5558	0.872(0.581-1.308)
Type 2 diabetes	finn-b-E4_DM2_STRICT	GCK	Other drugs	All OC (Histology Adjusted)	Inverse variance weighted (multiplicative random effects)	4	-0.137612	0.103601	0.18408	0.871(0.711-1.068)
Type 2 diabetes	finn-b-E4_DM2_STRICT	GCK	Other drugs	All OC (Histology Adjusted)	Inverse variance weighted (fixed effects)	4	-0.137612	0.13739	0.316528	0.871(0.666-1.141)
Type 2 diabetes	finn-b-E4_DM2_STRICT	GCK	Other drugs	All OC (Histology Adjusted)	Weighted median	4	-0.173348	0.162059	0.284772	0.841(0.612-1.155)
Type 2 diabetes	finn-b-E4_DM2_STRICT	GCK	Other drugs	All OC (Histology Adjusted)	Weighted mode	4	-0.18214	0.206661	0.443028	0.833(0.556-1.25)
Type 2 diabetes	ebi-a-GCST005413	PPARG	Sulfonylureas/TZDs	All OC	Inverse variance weighted (multiplicative random effects)	2	-0.0431738	0.00806408	8.61e-08	0.958(0.943-0.973)
Type 2 diabetes	ebi-a-GCST005413	PPARG	Sulfonylureas/TZDs	All OC	Inverse variance weighted (fixed effects)	2	-0.0431738	0.08204	0.598712	0.958(0.815-1.125)
Type 2 diabetes	ebi-a-GCST005413	PPARG	Sulfonylureas/TZDs	HGSOC	Inverse variance weighted (multiplicative random effects)	2	0.0430403	0.0783944	0.582989	1.044(0.895-1.217)
Type 2 diabetes	ebi-a-GCST005413	PPARG	Sulfonylureas/TZDs	HGSOC	Inverse variance weighted (fixed effects)	2	0.0430403	0.0973311	0.658341	1.044(0.863-1.263)
Type 2 diabetes	ebi-a-GCST005413	PPARG	Sulfonylureas/TZDs	LGSOC	Inverse variance weighted (multiplicative random effects)	2	-0.138062	0.0682203	0.0429935	0.871(0.762-0.996)
Type 2 diabetes	ebi-a-GCST005413	PPARG	Sulfonylureas/TZDs	LGSOC	Inverse variance weighted (fixed effects)	2	-0.138062	0.299707	0.645044	0.871(0.484-1.567)
Type 2 diabetes	ebi-a-GCST005413	PPARG	Sulfonylureas/TZDs	Clear cell OC	Inverse variance weighted (multiplicative random effects)	2	-0.0907022	0.109677	0.40824	0.913(0.737-1.132)
Type 2 diabetes	ebi-a-GCST005413	PPARG	Sulfonylureas/TZDs	Clear cell OC	Inverse variance weighted (fixed effects)	2	-0.0907022	0.250136	0.716896	0.913(0.559-1.491)
Type 2 diabetes	ebi-a-GCST005413	PPARG	Sulfonylureas/TZDs	Mucinous OC	Inverse variance weighted (multiplicative random effects)	2	-0.283413	0.0205178	2.13e-43	0.753(0.724-0.784)
Type 2 diabetes	ebi-a-GCST005413	PPARG	Sulfonylureas/TZDs	Mucinous OC	Inverse variance weighted (fixed effects)	2	-0.283413	0.187128	0.12989	0.753(0.522-1.087)
Type 2 diabetes	ebi-a-GCST005413	PPARG	Sulfonylureas/TZDs	Endometrioid All OC	Inverse variance weighted (multiplicative random effects)	2	-0.460469	0.0427604	4.84e-27	0.631(0.58-0.686)
Type 2 diabetes	ebi-a-GCST005413	PPARG	Sulfonylureas/TZDs	Endometrioid All OC	Inverse variance weighted (fixed effects)	2	-0.460469	0.181399	0.0111352	0.631(0.442-0.9)
Type 2 diabetes	ebi-a-GCST005413	PPARG	Sulfonylureas/TZDs	HGSOC (Survival)	Inverse variance weighted (multiplicative random effects)	2	0.397505	0.0854667	3.3e-06	1.488(1.259-1.759)
Type 2 diabetes	ebi-a-GCST005413	PPARG	Sulfonylureas/TZDs	HGSOC (Survival)	Inverse variance weighted (fixed effects)	2	0.397505	0.124616	0.00142352	1.488(1.166-1.9)
Type 2 diabetes	ebi-a-GCST005413	PPARG	Sulfonylureas/TZDs	All OC (Histology Unadjusted)	Inverse variance weighted (multiplicative random effects)	2	0.350772	0.0629207	2.48e-08	1.42(1.255-1.607)
Type 2 diabetes	ebi-a-GCST005413	PPARG	Sulfonylureas/TZDs	All OC (Histology Unadjusted)	Inverse variance weighted (fixed effects)	2	0.350772	0.106946	0.0010384	1.42(1.152-1.751)
Type 2 diabetes	ebi-a-GCST005413	PPARG	Sulfonylureas/TZDs	All OC (Histology Adjusted)	Inverse variance weighted (multiplicative random effects)	2	0.295783	0.0610818	1.28e-06	1.344(1.193-1.515)
Type 2 diabetes	ebi-a-GCST005413	PPARG	Sulfonylureas/TZDs	All OC (Histology Adjusted)	Inverse variance weighted (fixed effects)	2	0.295783	0.107021	0.00571346	1.344(1.09-1.658)
Type 2 diabetes	ebi-a-GCST005413	RXRB	TZDs	All OC	Wald ratio	1	0.0584945	0.114114	0.608233	1.06(0.848-1.326)
Type 2 diabetes	ebi-a-GCST005413	RXRB	TZDs	HGSOC	Wald ratio	1	0.12896	0.135651	0.34177	1.138(0.872-1.484)
Type 2 diabetes	ebi-a-GCST005413	RXRB	TZDs	LGSOC	Wald ratio	1	-0.596968	0.404286	0.139784	0.55(0.249-1.216)
Type 2 diabetes	ebi-a-GCST005413	RXRB	TZDs	Clear cell OC	Wald ratio	1	-0.301934	0.342917	0.378595	0.739(0.378-1.448)
Type 2 diabetes	ebi-a-GCST005413	RXRB	TZDs	Mucinous OC	Wald ratio	1	-0.214428	0.255044	0.40049	0.807(0.49-1.33)
Type 2 diabetes	ebi-a-GCST005413	RXRB	TZDs	Endometrioid All OC	Wald ratio	1	0.373183	0.251594	0.138002	1.452(0.887-2.378)
Type 2 diabetes	ebi-a-GCST005413	RXRB	TZDs	HGSOC (Survival)	Wald ratio	1	0.273811	0.177836	0.123638	1.315(0.928-1.863)
Type 2 diabetes	ebi-a-GCST005413	RXRB	TZDs	All OC (Histology Unadjusted)	Wald ratio	1	0.227705	0.15149	0.132812	1.256(0.933-1.69)
Type 2 diabetes	ebi-a-GCST005413	RXRB	TZDs	All OC (Histology Adjusted)	Wald ratio	1	0.289597	0.151856	0.0565132	1.336(0.992-1.799)
Fasting glucose	ieu-b-114	ABCB11	Sulfonylureas	All OC	Inverse variance weighted (multiplicative random effects)	3	1.36441	0.161023	2.38e-17	3.913(2.854-5.366)
Fasting glucose	ieu-b-114	ABCB11	Sulfonylureas	All OC	Inverse variance weighted (fixed effects)	3	1.36441	0.581837	0.0190266	3.913(1.251-12.241)
Fasting glucose	ieu-b-114	ABCB11	Sulfonylureas	All OC	Weighted median	3	1.3258	0.665091	0.046217	3.765(1.022-13.865)
Fasting glucose	ieu-b-114	ABCB11	Sulfonylureas	All OC	Weighted mode	3	1.29191	0.792725	0.244725	3.64(0.77-17.213)
Fasting glucose	ieu-b-114	ABCB11	Sulfonylureas	HGSOC	Inverse variance weighted (multiplicative random effects)	3	1.30461	0.178272	2.52e-13	3.686(2.599-5.228)
Fasting glucose	ieu-b-114	ABCB11	Sulfonylureas	HGSOC	Inverse variance weighted (fixed effects)	3	1.30461	0.693154	0.0598173	3.686(0.947-14.342)
Fasting glucose	ieu-b-114	ABCB11	Sulfonylureas	HGSOC	Weighted median	3	1.22155	0.782741	0.118617	3.392(0.732-15.732)
Fasting glucose	ieu-b-114	ABCB11	Sulfonylureas	HGSOC	Weighted mode	3	1.08928	0.958877	0.373752	2.972(0.454-19.466)
Fasting glucose	ieu-b-114	ABCB11	Sulfonylureas	LGSOC	Inverse variance weighted (multiplicative random effects)	3	-3.90944	1.3338	0.00337818	0.02(0.001-0.274)
Fasting glucose	ieu-b-114	ABCB11	Sulfonylureas	LGSOC	Inverse variance weighted (fixed effects)	3	-3.90944	2.12684	0.0660412	0.02(0-1.296)
Fasting glucose	ieu-b-114	ABCB11	Sulfonylureas	LGSOC	Weighted median	3	-4.36176	2.50157	0.0812272	0.013(0-1.718)
Fasting glucose	ieu-b-114	ABCB11	Sulfonylureas	LGSOC	Weighted mode	3	-4.75598	2.95917	0.249257	0.009(0-2.84)
Fasting glucose	ieu-b-114	ABCB11	Sulfonylureas	Clear cell OC	Inverse variance weighted (multiplicative random effects)	3	-0.687963	0.874188	0.431298	0.503(0.091-2.788)
Fasting glucose	ieu-b-114	ABCB11	Sulfonylureas	Clear cell OC	Inverse variance weighted (fixed effects)	3	-0.687963	1.77034	0.697569	0.503(0.016-16.15)
Fasting glucose	ieu-b-114	ABCB11	Sulfonylureas	Clear cell OC	Weighted median	3	-0.210008	1.98035	0.915546	0.811(0.017-39.31)
Fasting glucose	ieu-b-114	ABCB11	Sulfonylureas	Clear cell OC	Weighted mode	3	-0.0465202	2.42813	0.986454	0.955(0.008-111.342)
Fasting glucose	ieu-b-114	ABCB11	Sulfonylureas	Mucinous OC	Inverse variance weighted (multiplicative random effects)	3	1.33481	1.68366	0.427896	3.799(0.14-103.006)
Fasting glucose	ieu-b-114	ABCB11	Sulfonylureas	Mucinous OC	Inverse variance weighted (fixed effects)	3	1.33481	1.31886	0.311494	3.799(0.286-50.389)
Fasting glucose	ieu-b-114	ABCB11	Sulfonylureas	Mucinous OC	Weighted median	3	1.54061	1.57513	0.328033	4.667(0.213-102.294)
Fasting glucose	ieu-b-114	ABCB11	Sulfonylureas	Mucinous OC	Weighted mode	3	2.87395	2.51996	0.372255	17.707(0.127-2472.715)
Fasting glucose	ieu-b-114	ABCB11	Sulfonylureas	Endometrioid All OC	Inverse variance weighted (multiplicative random effects)	3	2.02856	0.564939	0.000329704	7.603(2.513-23.008)
Fasting glucose	ieu-b-114	ABCB11	Sulfonylureas	Endometrioid All OC	Inverse variance weighted (fixed effects)	3	2.02856	1.26009	0.10743	7.603(0.643-89.868)
Fasting glucose	ieu-b-114	ABCB11	Sulfonylureas	Endometrioid All OC	Weighted median	3	1.88053	1.41979	0.185332	6.557(0.406-105.986)
Fasting glucose	ieu-b-114	ABCB11	Sulfonylureas	Endometrioid All OC	Weighted mode	3	1.38751	1.85264	0.531997	4.005(0.106-151.212)
Fasting glucose	ieu-b-114	ABCB11	Sulfonylureas	HGSOC (Survival)	Inverse variance weighted (multiplicative random effects)	3	-0.737095	0.845459	0.383302	0.479(0.091-2.509)
Fasting glucose	ieu-b-114	ABCB11	Sulfonylureas	HGSOC (Survival)	Inverse variance weighted (fixed effects)	3	-0.737095	0.906451	0.416123	0.479(0.081-2.828)
Fasting glucose	ieu-b-114	ABCB11	Sulfonylureas	HGSOC (Survival)	Weighted median	3	-0.503951	1.10453	0.648203	0.604(0.069-5.264)
Fasting glucose	ieu-b-114	ABCB11	Sulfonylureas	HGSOC (Survival)	Weighted mode	3	-0.241957	1.3128	0.870769	0.785(0.06-10.29)
Fasting glucose	ieu-b-114	ABCB11	Sulfonylureas	All OC (Histology Unadjusted)	Inverse variance weighted (multiplicative random effects)	3	-0.840247	0.46619	0.0714874	0.432(0.173-1.076)
Fasting glucose	ieu-b-114	ABCB11	Sulfonylureas	All OC (Histology Unadjusted)	Inverse variance weighted (fixed effects)	3	-0.840247	0.766166	0.272777	0.432(0.096-1.938)
Fasting glucose	ieu-b-114	ABCB11	Sulfonylureas	All OC (Histology Unadjusted)	Weighted median	3	-0.8623	0.892042	0.333715	0.422(0.073-2.426)
Fasting glucose	ieu-b-114	ABCB11	Sulfonylureas	All OC (Histology Unadjusted)	Weighted mode	3	-0.422528	1.13153	0.744706	0.655(0.071-6.021)
Fasting glucose	ieu-b-114	ABCB11	Sulfonylureas	All OC (Histology Adjusted)	Inverse variance weighted (multiplicative random effects)	3	-0.369524	0.370886	0.31909	0.691(0.334-1.43)
Fasting glucose	ieu-b-114	ABCB11	Sulfonylureas	All OC (Histology Adjusted)	Inverse variance weighted (fixed effects)	3	-0.369524	0.769791	0.631204	0.691(0.153-3.124)
Fasting glucose	ieu-b-114	ABCB11	Sulfonylureas	All OC (Histology Adjusted)	Weighted median	3	-0.495728	0.846481	0.558121	0.609(0.116-3.201)
Fasting glucose	ieu-b-114	ABCB11	Sulfonylureas	All OC (Histology Adjusted)	Weighted mode	3	-0.808653	1.04782	0.520976	0.445(0.057-3.473)
Fasting glucose	ieu-b-114	LRP2	Insulin	All OC	Wald ratio	1	1.37	0.895333	0.125978	3.935(0.681-22.757)
Fasting glucose	ieu-b-114	LRP2	Insulin	HGSOC	Wald ratio	1	1.59867	1.06533	0.133452	4.946(0.613-39.914)
Fasting glucose	ieu-b-114	LRP2	Insulin	LGSOC	Wald ratio	1	-5.56	3.26133	0.0882272	0.004(0-2.298)
Fasting glucose	ieu-b-114	LRP2	Insulin	Clear cell OC	Wald ratio	1	0.214667	2.71467	0.936972	1.239(0.006-253.513)
Fasting glucose	ieu-b-114	LRP2	Insulin	Mucinous OC	Wald ratio	1	-1.36733	2.03933	0.502552	0.255(0.005-13.87)
Fasting glucose	ieu-b-114	LRP2	Insulin	Endometrioid All OC	Wald ratio	1	2.938	1.936	0.129125	18.878(0.425-839.293)
Fasting glucose	ieu-b-114	LRP2	Insulin	HGSOC (Survival)	Wald ratio	1	0.395267	1.388	0.775817	1.485(0.098-22.55)
Fasting glucose	ieu-b-114	LRP2	Insulin	All OC (Histology Unadjusted)	Wald ratio	1	-0.125	1.17667	0.915398	0.882(0.088-8.858)
Fasting glucose	ieu-b-114	LRP2	Insulin	All OC (Histology Adjusted)	Wald ratio	1	0.238667	1.18333	0.840159	1.27(0.125-12.91)
Fasting glucose	ieu-b-114	GCK	Other drugs	All OC	Inverse variance weighted (multiplicative random effects)	4	-0.230687	0.166029	0.164699	0.794(0.573-1.099)
Fasting glucose	ieu-b-114	GCK	Other drugs	All OC	Inverse variance weighted (fixed effects)	4	-0.230687	0.205464	0.261539	0.794(0.531-1.188)
Fasting glucose	ieu-b-114	GCK	Other drugs	All OC	Weighted median	4	-0.140229	0.250968	0.57633	0.869(0.531-1.421)
Fasting glucose	ieu-b-114	GCK	Other drugs	All OC	Weighted mode	4	-0.0805053	0.31098	0.812477	0.923(0.502-1.697)
Fasting glucose	ieu-b-114	GCK	Other drugs	HGSOC	Inverse variance weighted (multiplicative random effects)	4	-0.60782	0.127479	1.86e-06	0.545(0.424-0.699)
Fasting glucose	ieu-b-114	GCK	Other drugs	HGSOC	Inverse variance weighted (fixed effects)	4	-0.60782	0.243579	0.0125825	0.545(0.338-0.878)
Fasting glucose	ieu-b-114	GCK	Other drugs	HGSOC	Weighted median	4	-0.594602	0.293701	0.0429176	0.552(0.31-0.981)
Fasting glucose	ieu-b-114	GCK	Other drugs	HGSOC	Weighted mode	4	-0.579575	0.306121	0.154652	0.56(0.307-1.021)
Fasting glucose	ieu-b-114	GCK	Other drugs	LGSOC	Inverse variance weighted (multiplicative random effects)	4	1.3879	1.24878	0.266395	4.006(0.347-46.317)
Fasting glucose	ieu-b-114	GCK	Other drugs	LGSOC	Inverse variance weighted (fixed effects)	4	1.3879	0.743216	0.0618431	4.006(0.934-17.195)
Fasting glucose	ieu-b-114	GCK	Other drugs	LGSOC	Weighted median	4	1.50457	0.864309	0.0817218	4.502(0.827-24.499)
Fasting glucose	ieu-b-114	GCK	Other drugs	LGSOC	Weighted mode	4	1.44033	0.842155	0.185739	4.222(0.81-21.998)
Fasting glucose	ieu-b-114	GCK	Other drugs	Clear cell OC	Inverse variance weighted (multiplicative random effects)	4	-0.0208456	0.537473	0.969062	0.979(0.342-2.808)
Fasting glucose	ieu-b-114	GCK	Other drugs	Clear cell OC	Inverse variance weighted (fixed effects)	4	-0.0208456	0.620025	0.97318	0.979(0.291-3.302)
Fasting glucose	ieu-b-114	GCK	Other drugs	Clear cell OC	Weighted median	4	-0.176175	0.74319	0.812616	0.838(0.195-3.598)
Fasting glucose	ieu-b-114	GCK	Other drugs	Clear cell OC	Weighted mode	4	-0.203142	0.818862	0.820085	0.816(0.164-4.063)
Fasting glucose	ieu-b-114	GCK	Other drugs	Mucinous OC	Inverse variance weighted (multiplicative random effects)	4	-1.08286	0.277727	9.66e-05	0.339(0.196-0.584)
Fasting glucose	ieu-b-114	GCK	Other drugs	Mucinous OC	Inverse variance weighted (fixed effects)	4	-1.08286	0.464201	0.0196624	0.339(0.136-0.841)
Fasting glucose	ieu-b-114	GCK	Other drugs	Mucinous OC	Weighted median	4	-0.938285	0.54636	0.0859172	0.391(0.134-1.142)
Fasting glucose	ieu-b-114	GCK	Other drugs	Mucinous OC	Weighted mode	4	-0.806899	0.641331	0.297347	0.446(0.127-1.568)
Fasting glucose	ieu-b-114	GCK	Other drugs	Endometrioid All OC	Inverse variance weighted (multiplicative random effects)	4	0.878709	0.390049	0.0242707	2.408(1.121-5.172)
Fasting glucose	ieu-b-114	GCK	Other drugs	Endometrioid All OC	Inverse variance weighted (fixed effects)	4	0.878709	0.447894	0.0497776	2.408(1.001-5.793)
Fasting glucose	ieu-b-114	GCK	Other drugs	Endometrioid All OC	Weighted median	4	0.671596	0.524771	0.200619	1.957(0.7-5.475)
Fasting glucose	ieu-b-114	GCK	Other drugs	Endometrioid All OC	Weighted mode	4	0.586758	0.605094	0.403723	1.798(0.549-5.887)
Fasting glucose	ieu-b-114	GCK	Other drugs	HGSOC (Survival)	Inverse variance weighted (multiplicative random effects)	4	-0.693097	0.163861	2.34e-05	0.5(0.363-0.689)
Fasting glucose	ieu-b-114	GCK	Other drugs	HGSOC (Survival)	Inverse variance weighted (fixed effects)	4	-0.693097	0.315539	0.0280528	0.5(0.269-0.928)
Fasting glucose	ieu-b-114	GCK	Other drugs	HGSOC (Survival)	Weighted median	4	-0.612719	0.360233	0.0889623	0.542(0.267-1.098)
Fasting glucose	ieu-b-114	GCK	Other drugs	HGSOC (Survival)	Weighted mode	4	-0.63661	0.406223	0.215071	0.529(0.239-1.173)
Fasting glucose	ieu-b-114	GCK	Other drugs	All OC (Histology Unadjusted)	Inverse variance weighted (multiplicative random effects)	4	-0.287168	0.238534	0.228633	0.75(0.47-1.198)
Fasting glucose	ieu-b-114	GCK	Other drugs	All OC (Histology Unadjusted)	Inverse variance weighted (fixed effects)	4	-0.287168	0.26884	0.285442	0.75(0.443-1.271)
Fasting glucose	ieu-b-114	GCK	Other drugs	All OC (Histology Unadjusted)	Weighted median	4	-0.329991	0.332134	0.320443	0.719(0.375-1.378)
Fasting glucose	ieu-b-114	GCK	Other drugs	All OC (Histology Unadjusted)	Weighted mode	4	-0.36066	0.353179	0.382336	0.697(0.349-1.393)
Fasting glucose	ieu-b-114	GCK	Other drugs	All OC (Histology Adjusted)	Inverse variance weighted (multiplicative random effects)	4	-0.353654	0.225001	0.116	0.702(0.452-1.091)
Fasting glucose	ieu-b-114	GCK	Other drugs	All OC (Histology Adjusted)	Inverse variance weighted (fixed effects)	4	-0.353654	0.270106	0.190428	0.702(0.414-1.192)
Fasting glucose	ieu-b-114	GCK	Other drugs	All OC (Histology Adjusted)	Weighted median	4	-0.331133	0.307217	0.281101	0.718(0.393-1.311)
Fasting glucose	ieu-b-114	GCK	Other drugs	All OC (Histology Adjusted)	Weighted mode	4	-0.363589	0.36019	0.387119	0.695(0.343-1.408)
Type 2 diabetes	ieu-a-23	ABCC8/KCNJ11+PPARG	Sulfonylureas	All OC	Inverse variance weighted (multiplicative random effects)	3	0.0256789	0.0924256	0.78114	1.026(0.856-1.23)
Type 2 diabetes	ieu-a-23	ABCC8/KCNJ11+PPARG	Sulfonylureas	All OC	Inverse variance weighted (fixed effects)	3	0.0256789	0.0886327	0.772028	1.026(0.862-1.221)
Type 2 diabetes	ieu-a-23	ABCC8/KCNJ11+PPARG	Sulfonylureas	All OC	Weighted median	3	-0.0501872	0.109352	0.646271	0.951(0.768-1.178)
Type 2 diabetes	ieu-a-23	ABCC8/KCNJ11+PPARG	Sulfonylureas	All OC	Weighted mode	3	-0.0625173	0.141239	0.701299	0.939(0.712-1.239)
Type 2 diabetes	ieu-a-23	ABCC8/KCNJ11+PPARG	Sulfonylureas	HGSOC	Inverse variance weighted (multiplicative random effects)	3	0.0841286	0.0833675	0.312913	1.088(0.924-1.281)
Type 2 diabetes	ieu-a-23	ABCC8/KCNJ11+PPARG	Sulfonylureas	HGSOC	Inverse variance weighted (fixed effects)	3	0.0841286	0.105259	0.424142	1.088(0.885-1.337)
Type 2 diabetes	ieu-a-23	ABCC8/KCNJ11+PPARG	Sulfonylureas	HGSOC	Weighted median	3	0.108214	0.13288	0.41543	1.114(0.859-1.446)
Type 2 diabetes	ieu-a-23	ABCC8/KCNJ11+PPARG	Sulfonylureas	HGSOC	Weighted mode	3	0.133312	0.159475	0.491148	1.143(0.836-1.562)
Type 2 diabetes	ieu-a-23	ABCC8/KCNJ11+PPARG	Sulfonylureas	LGSOC	Inverse variance weighted (multiplicative random effects)	3	-0.0195995	0.0344636	0.569558	0.981(0.917-1.049)
Type 2 diabetes	ieu-a-23	ABCC8/KCNJ11+PPARG	Sulfonylureas	LGSOC	Inverse variance weighted (fixed effects)	3	-0.0195995	0.321562	0.951398	0.981(0.522-1.842)
Type 2 diabetes	ieu-a-23	ABCC8/KCNJ11+PPARG	Sulfonylureas	LGSOC	Weighted median	3	-0.0519698	0.376357	0.890172	0.949(0.454-1.985)
Type 2 diabetes	ieu-a-23	ABCC8/KCNJ11+PPARG	Sulfonylureas	LGSOC	Weighted mode	3	-0.0527802	0.438466	0.915189	0.949(0.402-2.24)
Type 2 diabetes	ieu-a-23	ABCC8/KCNJ11+PPARG	Sulfonylureas	Clear cell OC	Inverse variance weighted (multiplicative random effects)	3	0.194516	0.312587	0.53376	1.215(0.658-2.242)
Type 2 diabetes	ieu-a-23	ABCC8/KCNJ11+PPARG	Sulfonylureas	Clear cell OC	Inverse variance weighted (fixed effects)	3	0.194516	0.269149	0.46986	1.215(0.717-2.059)
Type 2 diabetes	ieu-a-23	ABCC8/KCNJ11+PPARG	Sulfonylureas	Clear cell OC	Weighted median	3	0.204631	0.349821	0.558576	1.227(0.618-2.436)
Type 2 diabetes	ieu-a-23	ABCC8/KCNJ11+PPARG	Sulfonylureas	Clear cell OC	Weighted mode	3	0.245179	0.491418	0.667307	1.278(0.488-3.348)
Type 2 diabetes	ieu-a-23	ABCC8/KCNJ11+PPARG	Sulfonylureas	Mucinous OC	Inverse variance weighted (multiplicative random effects)	3	-0.322527	0.0859039	0.000173684	0.724(0.612-0.857)
Type 2 diabetes	ieu-a-23	ABCC8/KCNJ11+PPARG	Sulfonylureas	Mucinous OC	Inverse variance weighted (fixed effects)	3	-0.322527	0.201623	0.109675	0.724(0.488-1.075)
Type 2 diabetes	ieu-a-23	ABCC8/KCNJ11+PPARG	Sulfonylureas	Mucinous OC	Weighted median	3	-0.386328	0.242475	0.111099	0.68(0.422-1.093)
Type 2 diabetes	ieu-a-23	ABCC8/KCNJ11+PPARG	Sulfonylureas	Mucinous OC	Weighted mode	3	-0.405659	0.271338	0.27353	0.667(0.392-1.134)
Type 2 diabetes	ieu-a-23	ABCC8/KCNJ11+PPARG	Sulfonylureas	Endometrioid All OC	Inverse variance weighted (multiplicative random effects)	3	-0.223561	0.329542	0.49752	0.8(0.419-1.526)
Type 2 diabetes	ieu-a-23	ABCC8/KCNJ11+PPARG	Sulfonylureas	Endometrioid All OC	Inverse variance weighted (fixed effects)	3	-0.223561	0.194046	0.249279	0.8(0.547-1.17)
Type 2 diabetes	ieu-a-23	ABCC8/KCNJ11+PPARG	Sulfonylureas	Endometrioid All OC	Weighted median	3	-0.363052	0.283385	0.200149	0.696(0.399-1.212)
Type 2 diabetes	ieu-a-23	ABCC8/KCNJ11+PPARG	Sulfonylureas	Endometrioid All OC	Weighted mode	3	-0.504609	0.35302	0.289126	0.604(0.302-1.206)
Type 2 diabetes	ieu-a-23	ABCC8/KCNJ11+PPARG	Sulfonylureas	HGSOC (Survival)	Inverse variance weighted (multiplicative random effects)	3	0.345123	0.190931	0.0706721	1.412(0.971-2.053)
Type 2 diabetes	ieu-a-23	ABCC8/KCNJ11+PPARG	Sulfonylureas	HGSOC (Survival)	Inverse variance weighted (fixed effects)	3	0.345123	0.135956	0.0111332	1.412(1.082-1.843)
Type 2 diabetes	ieu-a-23	ABCC8/KCNJ11+PPARG	Sulfonylureas	HGSOC (Survival)	Weighted median	3	0.201595	0.192218	0.294279	1.223(0.839-1.783)
Type 2 diabetes	ieu-a-23	ABCC8/KCNJ11+PPARG	Sulfonylureas	HGSOC (Survival)	Weighted mode	3	0.129415	0.26227	0.670562	1.138(0.681-1.903)
Type 2 diabetes	ieu-a-23	ABCC8/KCNJ11+PPARG	Sulfonylureas	All OC (Histology Unadjusted)	Inverse variance weighted (multiplicative random effects)	3	0.3001	0.16583	0.0703437	1.35(0.975-1.868)
Type 2 diabetes	ieu-a-23	ABCC8/KCNJ11+PPARG	Sulfonylureas	All OC (Histology Unadjusted)	Inverse variance weighted (fixed effects)	3	0.3001	0.116224	0.00982052	1.35(1.075-1.695)
Type 2 diabetes	ieu-a-23	ABCC8/KCNJ11+PPARG	Sulfonylureas	All OC (Histology Unadjusted)	Weighted median	3	0.211828	0.168927	0.209856	1.236(0.888-1.721)
Type 2 diabetes	ieu-a-23	ABCC8/KCNJ11+PPARG	Sulfonylureas	All OC (Histology Unadjusted)	Weighted mode	3	0.138679	0.210296	0.577387	1.149(0.761-1.735)
Type 2 diabetes	ieu-a-23	ABCC8/KCNJ11+PPARG	Sulfonylureas	All OC (Histology Adjusted)	Inverse variance weighted (multiplicative random effects)	3	0.238139	0.149934	0.112221	1.269(0.946-1.702)
Type 2 diabetes	ieu-a-23	ABCC8/KCNJ11+PPARG	Sulfonylureas	All OC (Histology Adjusted)	Inverse variance weighted (fixed effects)	3	0.238139	0.116429	0.0408186	1.269(1.01-1.594)
Type 2 diabetes	ieu-a-23	ABCC8/KCNJ11+PPARG	Sulfonylureas	All OC (Histology Adjusted)	Weighted median	3	0.166758	0.160114	0.297646	1.181(0.863-1.617)
Type 2 diabetes	ieu-a-23	ABCC8/KCNJ11+PPARG	Sulfonylureas	All OC (Histology Adjusted)	Weighted mode	3	0.0913205	0.207593	0.70298	1.096(0.729-1.646)
Type 2 diabetes	finn-b-E4_DM2_STRICT	ABCC8/KCNJ11+PPARG+INS	Sulfonylureas	All OC	Inverse variance weighted (multiplicative random effects)	3	0.189127	0.097849	0.0532553	1.208(0.997-1.464)
Type 2 diabetes	finn-b-E4_DM2_STRICT	ABCC8/KCNJ11+PPARG+INS	Sulfonylureas	All OC	Inverse variance weighted (fixed effects)	3	0.189127	0.122763	0.123418	1.208(0.95-1.537)
Type 2 diabetes	finn-b-E4_DM2_STRICT	ABCC8/KCNJ11+PPARG+INS	Sulfonylureas	All OC	Weighted median	3	0.253209	0.163528	0.121523	1.288(0.935-1.775)
Type 2 diabetes	finn-b-E4_DM2_STRICT	ABCC8/KCNJ11+PPARG+INS	Sulfonylureas	All OC	Weighted mode	3	0.286978	0.19276	0.274968	1.332(0.913-1.944)
Type 2 diabetes	finn-b-E4_DM2_STRICT	ABCC8/KCNJ11+PPARG+INS	Sulfonylureas	HGSOC	Inverse variance weighted (multiplicative random effects)	3	0.185342	0.0726274	0.010712	1.204(1.044-1.388)
Type 2 diabetes	finn-b-E4_DM2_STRICT	ABCC8/KCNJ11+PPARG+INS	Sulfonylureas	HGSOC	Inverse variance weighted (fixed effects)	3	0.185342	0.14582	0.203718	1.204(0.904-1.602)
Type 2 diabetes	finn-b-E4_DM2_STRICT	ABCC8/KCNJ11+PPARG+INS	Sulfonylureas	HGSOC	Weighted median	3	0.204373	0.172173	0.235219	1.227(0.875-1.719)
Type 2 diabetes	finn-b-E4_DM2_STRICT	ABCC8/KCNJ11+PPARG+INS	Sulfonylureas	HGSOC	Weighted mode	3	0.23384	0.205189	0.372536	1.263(0.845-1.889)
Type 2 diabetes	finn-b-E4_DM2_STRICT	ABCC8/KCNJ11+PPARG+INS	Sulfonylureas	LGSOC	Inverse variance weighted (multiplicative random effects)	3	0.209013	0.534561	0.695797	1.232(0.432-3.514)
Type 2 diabetes	finn-b-E4_DM2_STRICT	ABCC8/KCNJ11+PPARG+INS	Sulfonylureas	LGSOC	Inverse variance weighted (fixed effects)	3	0.209013	0.444423	0.638139	1.232(0.516-2.945)
Type 2 diabetes	finn-b-E4_DM2_STRICT	ABCC8/KCNJ11+PPARG+INS	Sulfonylureas	LGSOC	Weighted median	3	0.0600177	0.613372	0.922052	1.062(0.319-3.533)
Type 2 diabetes	finn-b-E4_DM2_STRICT	ABCC8/KCNJ11+PPARG+INS	Sulfonylureas	LGSOC	Weighted mode	3	-0.158376	0.768988	0.855889	0.854(0.189-3.853)
Type 2 diabetes	finn-b-E4_DM2_STRICT	ABCC8/KCNJ11+PPARG+INS	Sulfonylureas	Clear cell OC	Inverse variance weighted (multiplicative random effects)	3	0.378972	0.484928	0.434507	1.461(0.565-3.779)
Type 2 diabetes	finn-b-E4_DM2_STRICT	ABCC8/KCNJ11+PPARG+INS	Sulfonylureas	Clear cell OC	Inverse variance weighted (fixed effects)	3	0.378972	0.373645	0.31046	1.461(0.702-3.038)
Type 2 diabetes	finn-b-E4_DM2_STRICT	ABCC8/KCNJ11+PPARG+INS	Sulfonylureas	Clear cell OC	Weighted median	3	0.629055	0.486991	0.196454	1.876(0.722-4.872)
Type 2 diabetes	finn-b-E4_DM2_STRICT	ABCC8/KCNJ11+PPARG+INS	Sulfonylureas	Clear cell OC	Weighted mode	3	0.844463	0.638697	0.317066	2.327(0.665-8.136)
Type 2 diabetes	finn-b-E4_DM2_STRICT	ABCC8/KCNJ11+PPARG+INS	Sulfonylureas	Mucinous OC	Inverse variance weighted (multiplicative random effects)	3	-0.141371	0.0566488	0.0125756	0.868(0.777-0.97)
Type 2 diabetes	finn-b-E4_DM2_STRICT	ABCC8/KCNJ11+PPARG+INS	Sulfonylureas	Mucinous OC	Inverse variance weighted (fixed effects)	3	-0.141371	0.277566	0.610526	0.868(0.504-1.496)
Type 2 diabetes	finn-b-E4_DM2_STRICT	ABCC8/KCNJ11+PPARG+INS	Sulfonylureas	Mucinous OC	Weighted median	3	-0.188091	0.314099	0.549288	0.829(0.448-1.533)
Type 2 diabetes	finn-b-E4_DM2_STRICT	ABCC8/KCNJ11+PPARG+INS	Sulfonylureas	Mucinous OC	Weighted mode	3	-0.200415	0.37502	0.64651	0.818(0.392-1.707)
Type 2 diabetes	finn-b-E4_DM2_STRICT	ABCC8/KCNJ11+PPARG+INS	Sulfonylureas	Endometrioid All OC	Inverse variance weighted (multiplicative random effects)	3	0.204888	0.277041	0.459567	1.227(0.713-2.113)
Type 2 diabetes	finn-b-E4_DM2_STRICT	ABCC8/KCNJ11+PPARG+INS	Sulfonylureas	Endometrioid All OC	Inverse variance weighted (fixed effects)	3	0.204888	0.266324	0.441703	1.227(0.728-2.069)
Type 2 diabetes	finn-b-E4_DM2_STRICT	ABCC8/KCNJ11+PPARG+INS	Sulfonylureas	Endometrioid All OC	Weighted median	3	0.336635	0.34773	0.332998	1.4(0.708-2.768)
Type 2 diabetes	finn-b-E4_DM2_STRICT	ABCC8/KCNJ11+PPARG+INS	Sulfonylureas	Endometrioid All OC	Weighted mode	3	0.484992	0.451663	0.395277	1.624(0.67-3.936)
Type 2 diabetes	finn-b-E4_DM2_STRICT	ABCC8/KCNJ11+PPARG+INS	Sulfonylureas	HGSOC (Survival)	Inverse variance weighted (multiplicative random effects)	3	0.347528	0.176982	0.049572	1.416(1.001-2.003)
Type 2 diabetes	finn-b-E4_DM2_STRICT	ABCC8/KCNJ11+PPARG+INS	Sulfonylureas	HGSOC (Survival)	Inverse variance weighted (fixed effects)	3	0.347528	0.189964	0.0673328	1.416(0.976-2.054)
Type 2 diabetes	finn-b-E4_DM2_STRICT	ABCC8/KCNJ11+PPARG+INS	Sulfonylureas	HGSOC (Survival)	Weighted median	3	0.230413	0.264026	0.382832	1.259(0.75-2.113)
Type 2 diabetes	finn-b-E4_DM2_STRICT	ABCC8/KCNJ11+PPARG+INS	Sulfonylureas	HGSOC (Survival)	Weighted mode	3	0.163838	0.297893	0.637543	1.178(0.657-2.112)
Type 2 diabetes	finn-b-E4_DM2_STRICT	ABCC8/KCNJ11+PPARG+INS	Sulfonylureas	All OC (Histology Unadjusted)	Inverse variance weighted (multiplicative random effects)	3	0.240296	0.220686	0.276216	1.272(0.825-1.96)
Type 2 diabetes	finn-b-E4_DM2_STRICT	ABCC8/KCNJ11+PPARG+INS	Sulfonylureas	All OC (Histology Unadjusted)	Inverse variance weighted (fixed effects)	3	0.240296	0.161955	0.137882	1.272(0.926-1.747)
Type 2 diabetes	finn-b-E4_DM2_STRICT	ABCC8/KCNJ11+PPARG+INS	Sulfonylureas	All OC (Histology Unadjusted)	Weighted median	3	0.0436868	0.227876	0.847967	1.045(0.668-1.633)
Type 2 diabetes	finn-b-E4_DM2_STRICT	ABCC8/KCNJ11+PPARG+INS	Sulfonylureas	All OC (Histology Unadjusted)	Weighted mode	3	0.00660477	0.283437	0.983525	1.007(0.578-1.754)
Type 2 diabetes	finn-b-E4_DM2_STRICT	ABCC8/KCNJ11+PPARG+INS	Sulfonylureas	All OC (Histology Adjusted)	Inverse variance weighted (multiplicative random effects)	3	0.225744	0.1792	0.207766	1.253(0.882-1.781)
Type 2 diabetes	finn-b-E4_DM2_STRICT	ABCC8/KCNJ11+PPARG+INS	Sulfonylureas	All OC (Histology Adjusted)	Inverse variance weighted (fixed effects)	3	0.225744	0.162414	0.164549	1.253(0.912-1.723)
Type 2 diabetes	finn-b-E4_DM2_STRICT	ABCC8/KCNJ11+PPARG+INS	Sulfonylureas	All OC (Histology Adjusted)	Weighted median	3	0.0834449	0.215683	0.69884	1.087(0.712-1.659)
Type 2 diabetes	finn-b-E4_DM2_STRICT	ABCC8/KCNJ11+PPARG+INS	Sulfonylureas	All OC (Histology Adjusted)	Weighted mode	3	0.0376654	0.257117	0.896966	1.038(0.627-1.719)
Type 2 diabetes	ebi-a-GCST005413	PPARG+RXRB	TZDs	All OC	Inverse variance weighted (multiplicative random effects)	3	-0.00853096	0.0343862	0.804063	0.992(0.927-1.061)
Type 2 diabetes	ebi-a-GCST005413	PPARG+RXRB	TZDs	All OC	Inverse variance weighted (fixed effects)	3	-0.00853096	0.066612	0.898094	0.992(0.87-1.13)
Type 2 diabetes	ebi-a-GCST005413	PPARG+RXRB	TZDs	All OC	Weighted median	3	-0.0218086	0.0761941	0.774706	0.978(0.843-1.136)
Type 2 diabetes	ebi-a-GCST005413	PPARG+RXRB	TZDs	All OC	Weighted mode	3	-0.0424433	0.0908701	0.686388	0.958(0.802-1.145)
Type 2 diabetes	ebi-a-GCST005413	PPARG+RXRB	TZDs	HGSOC	Inverse variance weighted (multiplicative random effects)	3	0.0722407	0.0534474	0.176496	1.075(0.968-1.194)
Type 2 diabetes	ebi-a-GCST005413	PPARG+RXRB	TZDs	HGSOC	Inverse variance weighted (fixed effects)	3	0.0722407	0.0790807	0.360977	1.075(0.921-1.255)
Type 2 diabetes	ebi-a-GCST005413	PPARG+RXRB	TZDs	HGSOC	Weighted median	3	0.101561	0.0914401	0.266704	1.107(0.925-1.324)
Type 2 diabetes	ebi-a-GCST005413	PPARG+RXRB	TZDs	HGSOC	Weighted mode	3	0.109968	0.106802	0.411408	1.116(0.905-1.376)
Type 2 diabetes	ebi-a-GCST005413	PPARG+RXRB	TZDs	LGSOC	Inverse variance weighted (multiplicative random effects)	3	-0.300816	0.160005	0.0601027	0.74(0.541-1.013)
Type 2 diabetes	ebi-a-GCST005413	PPARG+RXRB	TZDs	LGSOC	Inverse variance weighted (fixed effects)	3	-0.300816	0.240765	0.211512	0.74(0.462-1.187)
Type 2 diabetes	ebi-a-GCST005413	PPARG+RXRB	TZDs	LGSOC	Weighted median	3	-0.214252	0.27829	0.441367	0.807(0.468-1.393)
Type 2 diabetes	ebi-a-GCST005413	PPARG+RXRB	TZDs	LGSOC	Weighted mode	3	-0.136286	0.336068	0.724355	0.873(0.452-1.686)
Type 2 diabetes	ebi-a-GCST005413	PPARG+RXRB	TZDs	Clear cell OC	Inverse variance weighted (multiplicative random effects)	3	-0.164061	0.0947778	0.08345	0.849(0.705-1.022)
Type 2 diabetes	ebi-a-GCST005413	PPARG+RXRB	TZDs	Clear cell OC	Inverse variance weighted (fixed effects)	3	-0.164061	0.202086	0.416884	0.849(0.571-1.261)
Type 2 diabetes	ebi-a-GCST005413	PPARG+RXRB	TZDs	Clear cell OC	Weighted median	3	-0.189295	0.226555	0.403414	0.828(0.531-1.29)
Type 2 diabetes	ebi-a-GCST005413	PPARG+RXRB	TZDs	Clear cell OC	Weighted mode	3	-0.20871	0.256309	0.501014	0.812(0.491-1.341)
Type 2 diabetes	ebi-a-GCST005413	PPARG+RXRB	TZDs	Mucinous OC	Inverse variance weighted (multiplicative random effects)	3	-0.259272	0.0260408	2.37e-23	0.772(0.733-0.812)
Type 2 diabetes	ebi-a-GCST005413	PPARG+RXRB	TZDs	Mucinous OC	Inverse variance weighted (fixed effects)	3	-0.259272	0.150874	0.085712	0.772(0.574-1.037)
Type 2 diabetes	ebi-a-GCST005413	PPARG+RXRB	TZDs	Mucinous OC	Weighted median	3	-0.259318	0.172746	0.133317	0.772(0.55-1.082)
Type 2 diabetes	ebi-a-GCST005413	PPARG+RXRB	TZDs	Mucinous OC	Weighted mode	3	-0.262301	0.197754	0.315901	0.769(0.522-1.133)
Type 2 diabetes	ebi-a-GCST005413	PPARG+RXRB	TZDs	Endometrioid All OC	Inverse variance weighted (multiplicative random effects)	3	-0.17533	0.280718	0.53225	0.839(0.484-1.455)
Type 2 diabetes	ebi-a-GCST005413	PPARG+RXRB	TZDs	Endometrioid All OC	Inverse variance weighted (fixed effects)	3	-0.17533	0.147142	0.233431	0.839(0.629-1.12)
Type 2 diabetes	ebi-a-GCST005413	PPARG+RXRB	TZDs	Endometrioid All OC	Weighted median	3	-0.29057	0.2006	0.147477	0.748(0.505-1.108)
Type 2 diabetes	ebi-a-GCST005413	PPARG+RXRB	TZDs	Endometrioid All OC	Weighted mode	3	-0.456855	0.241741	0.199355	0.633(0.394-1.017)
Type 2 diabetes	ebi-a-GCST005413	PPARG+RXRB	TZDs	HGSOC (Survival)	Inverse variance weighted (multiplicative random effects)	3	0.35677	0.0643365	2.93e-08	1.429(1.259-1.621)
Type 2 diabetes	ebi-a-GCST005413	PPARG+RXRB	TZDs	HGSOC (Survival)	Inverse variance weighted (fixed effects)	3	0.35677	0.102054	0.000472488	1.429(1.17-1.745)
Type 2 diabetes	ebi-a-GCST005413	PPARG+RXRB	TZDs	HGSOC (Survival)	Weighted median	3	0.3258	0.119552	0.00642677	1.385(1.096-1.751)
Type 2 diabetes	ebi-a-GCST005413	PPARG+RXRB	TZDs	HGSOC (Survival)	Weighted mode	3	0.272539	0.153303	0.217414	1.313(0.972-1.774)
Type 2 diabetes	ebi-a-GCST005413	PPARG+RXRB	TZDs	All OC (Histology Unadjusted)	Inverse variance weighted (multiplicative random effects)	3	0.309838	0.0547914	1.56e-08	1.363(1.224-1.518)
Type 2 diabetes	ebi-a-GCST005413	PPARG+RXRB	TZDs	All OC (Histology Unadjusted)	Inverse variance weighted (fixed effects)	3	0.309838	0.0873679	0.000390588	1.363(1.149-1.618)
Type 2 diabetes	ebi-a-GCST005413	PPARG+RXRB	TZDs	All OC (Histology Unadjusted)	Weighted median	3	0.277481	0.102591	0.00683615	1.32(1.079-1.614)
Type 2 diabetes	ebi-a-GCST005413	PPARG+RXRB	TZDs	All OC (Histology Unadjusted)	Weighted mode	3	0.238502	0.146716	0.245543	1.269(0.952-1.692)
Type 2 diabetes	ebi-a-GCST005413	PPARG+RXRB	TZDs	All OC (Histology Adjusted)	Inverse variance weighted (multiplicative random effects)	3	0.293731	0.0353647	9.92e-17	1.341(1.252-1.438)
Type 2 diabetes	ebi-a-GCST005413	PPARG+RXRB	TZDs	All OC (Histology Adjusted)	Inverse variance weighted (fixed effects)	3	0.293731	0.0874792	0.000785883	1.341(1.13-1.592)
Type 2 diabetes	ebi-a-GCST005413	PPARG+RXRB	TZDs	All OC (Histology Adjusted)	Weighted median	3	0.303587	0.0989058	0.00214449	1.355(1.116-1.645)
Type 2 diabetes	ebi-a-GCST005413	PPARG+RXRB	TZDs	All OC (Histology Adjusted)	Weighted mode	3	0.314735	0.123599	0.125775	1.37(1.075-1.745)
This table displays the results from a replication analysis in Mendelian Randomization (MR) studies, focusing on the impact of antidiabetic drug gene targets on various ovarian cancer (OC) phenotypes. The table lists results for each drug target under specific MR analysis scenarios, presenting metrics such as the number of single nucleotide polymorphisms (nsnp) involved, effect size (β), standard…

## Sheet: Table S8
Results of MR-PRESSO analysis
Drugs	Target Genes	Outcome	Raw.beta	Raw.beta.SD	Raw.beta.p	Outlier.corrected.beta	Outlier.corrected.beta.SD	Outlier.corrected.beta.P	Global.Test.P	Distortion.Test.p
Sulfonylureas	ABCC8/KCNJ11	All OC	-0.726721	0.596083	0.309898	NA	NA	NA	0.321	NA
Sulfonylureas	ABCC8/KCNJ11	HGSOC	-1.07351	0.743633	0.244565	NA	NA	NA	0.305	NA
Sulfonylureas	ABCC8/KCNJ11	LGSOC	0.414057	0.418599	0.395513	NA	NA	NA	0.962	NA
Sulfonylureas	ABCC8/KCNJ11	Clear cell OC	-2.26249	0.489577	0.0190728	NA	NA	NA	0.937	NA
Sulfonylureas	ABCC8/KCNJ11	Mucinous OC	1.88119	0.876107	0.121025	NA	NA	NA	0.522	NA
Sulfonylureas	ABCC8/KCNJ11	Endometrioid OC	-1.26162	1.01844	0.303518	NA	NA	NA	0.52	NA
Sulfonylureas	ABCC8/KCNJ11	HGSOC (Survival)	0.250736	0.613195	0.710051	NA	NA	NA	0.615	NA
Sulfonylureas	ABCC8/KCNJ11	All OC (Histology Unadjusted)	0.221176	0.884989	0.818786	NA	NA	NA	0.244	NA
Sulfonylureas	ABCC8/KCNJ11	All OC (Histology Adjusted)	0.41122	0.673887	0.584834	NA	NA	NA	0.458	NA
Sulfonylureas	ABCB11	All OC	-0.27207	0.169839	0.125668	NA	NA	NA	0.708	NA
Sulfonylureas	ABCB11	HGSOC	-0.496387	0.176728	0.0112076	NA	NA	NA	0.905	NA
Sulfonylureas	ABCB11	LGSOC	1.11529	0.774075	0.165918	NA	NA	NA	0.214	NA
Sulfonylureas	ABCB11	Clear cell OC	0.202372	0.634512	0.75325	NA	NA	NA	0.25	NA
Sulfonylureas	ABCB11	Mucinous OC	0.617294	0.540196	0.267349	NA	NA	NA	0.058	NA
Sulfonylureas	ABCB11	Endometrioid OC	-0.0779017	0.38472	0.841686	NA	NA	NA	0.631	NA
Sulfonylureas	ABCB11	HGSOC (Survival)	-0.101024	0.256873	0.698487	NA	NA	NA	0.693	NA
Sulfonylureas	ABCB11	All OC (Histology Unadjusted)	0.0194304	0.225686	0.932292	NA	NA	NA	0.673	NA
Sulfonylureas	ABCB11	All OC (Histology Adjusted)	-0.158563	0.247803	0.529893	NA	NA	NA	0.497	NA
Sulfonylureas/TZDs	PPARG	All OC	-0.0968813	0.159497	0.548144	NA	NA	NA	0.301	NA
Sulfonylureas/TZDs	PPARG	HGSOC	0.0318143	0.187052	0.866087	NA	NA	NA	0.345	NA
Sulfonylureas/TZDs	PPARG	LGSOC	0.730201	0.375703	0.0613818	NA	NA	NA	0.989	NA
Sulfonylureas/TZDs	PPARG	Clear cell OC	-0.2455	0.341474	0.477741	NA	NA	NA	0.963	NA
Sulfonylureas/TZDs	PPARG	Mucinous OC	-0.711276	0.31923	0.0335191	NA	NA	NA	0.644	NA
Sulfonylureas/TZDs	PPARG	Endometrioid OC	-1.17749	0.318401	0.000868935	NA	NA	NA	0.566	NA
Sulfonylureas/TZDs	PPARG	HGSOC (Survival)	0.649428	0.231423	0.0087191	NA	NA	NA	0.457	NA
Sulfonylureas/TZDs	PPARG	All OC (Histology Unadjusted)	0.673065	0.202248	0.00232369	NA	NA	NA	0.349	NA
Sulfonylureas/TZDs	PPARG	All OC (Histology Adjusted)	0.502915	0.191454	0.0134442	NA	NA	NA	0.561	NA
Sulfonylureas	VEGFA	All OC	-0.354994	0.204488	0.133242	NA	NA	NA	0.893	NA
Sulfonylureas	VEGFA	HGSOC	-0.746062	0.178874	0.00587276	NA	NA	NA	0.977	NA
Sulfonylureas	VEGFA	LGSOC	1.03922	1.32859	0.46384	NA	NA	NA	0.335	NA
Sulfonylureas	VEGFA	Clear cell OC	0.922093	1.21035	0.475025	NA	NA	NA	0.276	NA
Sulfonylureas	VEGFA	Mucinous OC	0.154478	0.867445	0.864517	NA	NA	NA	0.306	NA
Sulfonylureas	VEGFA	Endometrioid OC	0.109704	0.756227	0.889408	NA	NA	NA	0.374	NA
Sulfonylureas	VEGFA	HGSOC (Survival)	1.48628	0.263201	0.00132265	NA	NA	NA	0.949	NA
Sulfonylureas	VEGFA	All OC (Histology Unadjusted)	0.799795	0.368113	0.0727917	NA	NA	NA	0.56	NA
Sulfonylureas	VEGFA	All OC (Histology Adjusted)	1.06929	0.379938	0.0305793	NA	NA	NA	0.53	NA
Sulfonylureas	INS	All OC	1.04389	0.369808	0.0665852	NA	NA	NA	0.544	NA
Sulfonylureas	INS	HGSOC	1.24872	0.65483	0.152585	NA	NA	NA	0.219	NA
Sulfonylureas	INS	LGSOC	1.14069	0.842751	0.268836	NA	NA	NA	0.801	NA
Sulfonylureas	INS	Clear cell OC	0.806894	1.39023	0.602366	NA	NA	NA	0.336	NA
Sulfonylureas	INS	Mucinous OC	0.177329	0.699335	0.816214	NA	NA	NA	0.716	NA
Sulfonylureas	INS	Endometrioid OC	-0.332053	0.603345	0.620405	NA	NA	NA	0.74	NA
Sulfonylureas	INS	HGSOC (Survival)	-1.16593	0.529993	0.115184	NA	NA	NA	0.644	NA
Sulfonylureas	INS	All OC (Histology Unadjusted)	-0.948024	0.729172	0.284426	NA	NA	NA	0.239	NA
Sulfonylureas	INS	All OC (Histology Adjusted)	-1.06182	0.642256	0.196847	NA	NA	NA	0.376	NA
TZDs	SLC29A1	All OC	-0.354994	0.204488	0.133242	NA	NA	NA	0.882	NA
TZDs	SLC29A1	HGSOC	-0.746062	0.178874	0.00587276	NA	NA	NA	0.979	NA
TZDs	SLC29A1	LGSOC	1.03922	1.32859	0.46384	NA	NA	NA	0.345	NA
TZDs	SLC29A1	Clear cell OC	0.922093	1.21035	0.475025	NA	NA	NA	0.258	NA
TZDs	SLC29A1	Mucinous OC	0.154478	0.867445	0.864517	NA	NA	NA	0.255	NA
TZDs	SLC29A1	Endometrioid OC	0.109704	0.756227	0.889408	NA	NA	NA	0.396	NA
TZDs	SLC29A1	HGSOC (Survival)	1.48628	0.263201	0.00132265	NA	NA	NA	0.934	NA
TZDs	SLC29A1	All OC (Histology Unadjusted)	0.799795	0.368113	0.0727917	NA	NA	NA	0.595	NA
TZDs	SLC29A1	All OC (Histology Adjusted)	1.06929	0.379938	0.0305793	NA	NA	NA	0.53	NA
TZDs	RXRB	All OC	0.630471	0.118496	1.29e-05	NA	NA	NA	0.89	NA
TZDs	RXRB	HGSOC	0.992851	0.174777	4.93e-06	NA	NA	NA	0.397	NA
TZDs	RXRB	LGSOC	-0.2046	0.556461	0.715978	NA	NA	NA	0.228	NA
TZDs	RXRB	Clear cell OC	-0.216298	0.384819	0.578701	NA	NA	NA	0.738	NA
TZDs	RXRB	Mucinous OC	0.488023	0.34303	0.16628	NA	NA	NA	0.292	NA
TZDs	RXRB	Endometrioid OC	0.284234	0.293211	0.340958	NA	NA	NA	0.627	NA
TZDs	RXRB	HGSOC (Survival)	-1.5605	0.147655	4.28e-11	NA	NA	NA	0.999	NA
TZDs	RXRB	All OC (Histology Unadjusted)	-0.635683	0.139927	0.000103989	NA	NA	NA	0.971	NA
TZDs	RXRB	All OC (Histology Adjusted)	-0.954048	0.148694	7.12e-07	NA	NA	NA	0.94	NA
Insulin	LRP2	All OC	-0.229252	0.184122	0.233531	NA	NA	NA	0.621	NA
Insulin	LRP2	HGSOC	-0.478669	0.183275	0.0205028	NA	NA	NA	0.909	NA
Insulin	LRP2	LGSOC	1.40526	0.920644	0.149184	NA	NA	NA	0.114	NA
Insulin	LRP2	Clear cell OC	0.632008	0.701202	0.382662	NA	NA	NA	0.275	NA
Insulin	LRP2	Mucinous OC	0.69489	0.607901	0.27217	NA	NA	NA	0.056	NA
Insulin	LRP2	Endometrioid OC	0.00875262	0.43203	0.984122	NA	NA	NA	0.547	NA
Insulin	LRP2	HGSOC (Survival)	-0.1742	0.317056	0.591367	NA	NA	NA	0.434	NA
Insulin	LRP2	All OC (Histology Unadjusted)	0.235486	0.2416	0.346253	NA	NA	NA	0.671	NA
Insulin	LRP2	All OC (Histology Adjusted)	0.0168592	0.285458	0.953739	NA	NA	NA	0.367	NA
DPP4i	ITGAL	All OC	0.239156	0.128158	0.104273	NA	NA	NA	0.982	NA
DPP4i	ITGAL	HGSOC	-0.347164	0.293553	0.275564	NA	NA	NA	0.703	NA
DPP4i	ITGAL	LGSOC	-0.529924	0.505844	0.329641	NA	NA	NA	0.971	NA
DPP4i	ITGAL	Clear cell OC	-0.263658	0.654595	0.699127	NA	NA	NA	0.789	NA
DPP4i	ITGAL	Mucinous OC	1.99029	0.326459	0.000492731	NA	NA	NA	0.965	NA
DPP4i	ITGAL	Endometrioid OC	3.92393	0.260836	1.38e-06	NA	NA	NA	0.987	NA
DPP4i	ITGAL	HGSOC (Survival)	0.378722	0.24893	0.171969	NA	NA	NA	0.931	NA
DPP4i	ITGAL	All OC (Histology Unadjusted)	-0.109302	0.298578	0.725123	NA	NA	NA	0.739	NA
DPP4i	ITGAL	All OC (Histology Adjusted)	0.163441	0.251591	0.536657	NA	NA	NA	0.87	NA
GLP-1RA	GLP1R	All OC	-1.01633	0.65425	0.218145	NA	NA	NA	0.343	NA
GLP-1RA	GLP1R	HGSOC	-1.48948	0.675838	0.114753	NA	NA	NA	0.448	NA
GLP-1RA	GLP1R	LGSOC	-0.414255	1.30986	0.772534	NA	NA	NA	0.78	NA
GLP-1RA	GLP1R	Clear cell OC	-0.661338	2.24032	0.787094	NA	NA	NA	0.222	NA
GLP-1RA	GLP1R	Mucinous OC	-0.724026	0.469075	0.220393	NA	NA	NA	0.938	NA
GLP-1RA	GLP1R	Endometrioid OC	-0.265658	0.507048	0.63657	NA	NA	NA	0.916	NA
GLP-1RA	GLP1R	HGSOC (Survival)	-1.09296	0.114769	0.00245559	NA	NA	NA	0.996	NA
SGLT2i	SLC5A2	All OC	-0.587503	0.199109	0.0131939	NA	NA	NA	0.9	NA
SGLT2i	SLC5A2	HGSOC	-1.24526	0.247657	0.000385065	NA	NA	NA	0.857	NA
SGLT2i	SLC5A2	LGSOC	1.33704	1.00545	0.210502	NA	NA	NA	0.336	NA
SGLT2i	SLC5A2	Clear cell OC	0.0359072	0.624016	0.955145	NA	NA	NA	0.856	NA
SGLT2i	SLC5A2	Mucinous OC	0.741573	0.922486	0.438491	NA	NA	NA	0.013	NA
SGLT2i	SLC5A2	Endometrioid OC	0.936331	0.734255	0.228508	NA	NA	NA	0.11	NA
SGLT2i	SLC5A2	HGSOC (Survival)	-0.00194072	0.414883	0.996351	NA	NA	NA	0.486	NA
SGLT2i	SLC5A2	All OC (Histology Unadjusted)	-0.146283	0.28468	0.61752	NA	NA	NA	0.833	NA
SGLT2i	SLC5A2	All OC (Histology Adjusted)	-0.0179731	0.331137	0.957688	NA	NA	NA	0.63	NA
SGLT2i	SLC5A1	All OC	0.00948527	0.18872	0.961012	NA	NA	NA	0.921	NA
SGLT2i	SLC5A1	HGSOC	0.0966493	0.364812	0.797032	NA	NA	NA	0.374	NA
SGLT2i	SLC5A1	LGSOC	-3.2121	0.79605	0.0029505	NA	NA	NA	0.804	NA
SGLT2i	SLC5A1	Clear cell OC	-0.27038	0.545503	0.632017	NA	NA	NA	0.916	NA
SGLT2i	SLC5A1	Mucinous OC	-0.175914	0.566585	0.763265	NA	NA	NA	0.671	NA
SGLT2i	SLC5A1	Endometrioid OC	0.244383	0.383729	0.540073	NA	NA	NA	0.944	NA
SGLT2i	SLC5A1	HGSOC (Survival)	-0.176736	0.107772	0.135444	NA	NA	NA	1	NA
SGLT2i	SLC5A1	All OC (Histology Unadjusted)	-0.417152	0.132452	0.011748	NA	NA	NA	0.999	NA
SGLT2i	SLC5A1	All OC (Histology Adjusted)	-0.375602	0.16542	0.0493151	NA	NA	NA	0.993	NA
Other drugs	RAMP2	All OC	-1.93085	0.389372	0.00163968	NA	NA	NA	0.569	NA
Other drugs	RAMP2	HGSOC	-1.73613	0.531519	0.0137432	NA	NA	NA	0.344	NA
Other drugs	RAMP2	LGSOC	4.13761	0.840681	0.00171027	NA	NA	NA	0.938	NA
Other drugs	RAMP2	Clear cell OC	-5.46289	0.794803	0.000236964	NA	NA	NA	0.93	NA
Other drugs	RAMP2	Mucinous OC	-2.68412	0.411798	0.000328513	NA	NA	NA	0.988	NA
Other drugs	RAMP2	Endometrioid OC	-2.42798	0.962007	0.0395862	NA	NA	NA	0.324	NA
Other drugs	RAMP2	HGSOC (Survival)	0.139642	0.360746	0.710187	NA	NA	NA	0.927	NA
Other drugs	RAMP2	All OC (Histology Unadjusted)	-0.262837	0.530357	0.635365	NA	NA	NA	0.432	NA
Other drugs	RAMP2	All OC (Histology Adjusted)	-1.11524	0.331004	0.0119323	NA	NA	NA	0.908	NA
Other drugs	GCK	All OC	0.219555	0.0737191	0.00479881	NA	NA	NA	0.95	NA
Other drugs	GCK	HGSOC	0.396646	0.111921	0.000982056	NA	NA	NA	0.359	NA
Other drugs	GCK	LGSOC	-1.23478	0.361897	0.00143803	NA	NA	NA	0.143	NA
Other drugs	GCK	Clear cell OC	-0.134361	0.250325	0.594275	NA	NA	NA	0.737	NA
Other drugs	GCK	Mucinous OC	1.15902	0.205874	1.35e-06	NA	NA	NA	0.443	NA
Other drugs	GCK	Endometrioid OC	0.073133	0.205689	0.723956	NA	NA	NA	0.282	NA
Other drugs	GCK	HGSOC (Survival)	0.402768	0.121055	0.00183117	NA	NA	NA	0.876	NA
Other drugs	GCK	All OC (Histology Unadjusted)	0.0510799	0.110652	0.646731	NA	NA	NA	0.694	NA
Other drugs	GCK	All OC (Histology Adjusted)	0.186327	0.114691	0.11173	NA	NA	NA	0.618	NA
Other drugs	AKR1A1	All OC	-0.462744	0.167574	0.0397671	NA	NA	NA	0.954	NA
Other drugs	AKR1A1	HGSOC	-0.44352	0.100964	0.00706908	NA	NA	NA	0.997	NA
Other drugs	AKR1A1	LGSOC	-3.87397	0.524165	0.000713248	NA	NA	NA	0.976	NA
Other drugs	AKR1A1	Clear cell OC	0.49289	0.917083	0.614002	NA	NA	NA	0.576	NA
Other drugs	AKR1A1	Mucinous OC	1.35301	0.267489	0.00390602	NA	NA	NA	0.994	NA
Other drugs	AKR1A1	Endometrioid OC	-1.18722	0.498381	0.0629964	NA	NA	NA	0.847	NA
Other drugs	AKR1A1	HGSOC (Survival)	1.42673	0.137817	0.000144759	NA	NA	NA	0.995	NA
Other drugs	AKR1A1	All OC (Histology Unadjusted)	1.10811	0.425814	0.0481138	NA	NA	NA	0.562	NA
Other drugs	AKR1A1	All OC (Histology Adjusted)	1.31592	0.319748	0.00921435	NA	NA	NA	0.792	NA
Sulfonylureas	ABCC8/KCNJ11+ABCB11+CPT1A+INS+PPARG+VEGFA	All OC	-0.140808	0.107635	0.195212	NA	NA	NA	0.296	NA
Sulfonylureas	ABCC8/KCNJ11+ABCB11+CPT1A+INS+PPARG+VEGFA	HGSOC	-0.162262	0.131574	0.221733	NA	NA	NA	0.188	NA
Sulfonylureas	ABCC8/KCNJ11+ABCB11+CPT1A+INS+PPARG+VEGFA	LGSOC	0.874435	0.313464	0.0068407	NA	NA	NA	0.968	NA
Sulfonylureas	ABCC8/KCNJ11+ABCB11+CPT1A+INS+PPARG+VEGFA	Clear cell OC	-0.102664	0.291233	0.725543	NA	NA	NA	0.759	NA
Sulfonylureas	ABCC8/KCNJ11+ABCB11+CPT1A+INS+PPARG+VEGFA	Mucinous OC	-0.0769125	0.264788	0.772342	NA	NA	NA	0.068	NA
Sulfonylureas	ABCC8/KCNJ11+ABCB11+CPT1A+INS+PPARG+VEGFA	Endometrioid OC	-0.688795	0.22503	0.00315801	NA	NA	NA	0.447	NA
Sulfonylureas	ABCC8/KCNJ11+ABCB11+CPT1A+INS+PPARG+VEGFA	HGSOC (Survival)	0.38252	0.155999	0.0167769	NA	NA	NA	0.565	NA
Sulfonylureas	ABCC8/KCNJ11+ABCB11+CPT1A+INS+PPARG+VEGFA	All OC (Histology Unadjusted)	0.382499	0.142748	0.00923907	NA	NA	NA	0.248	NA
Sulfonylureas	ABCC8/KCNJ11+ABCB11+CPT1A+INS+PPARG+VEGFA	All OC (Histology Adjusted)	0.273564	0.141673	0.057659	NA	NA	NA	0.287	NA
TZDs	SLC29A1+RXRB+PPARG	All OC	0.250213	0.0993018	0.0140988	NA	NA	NA	0.372	NA
TZDs	SLC29A1+RXRB+PPARG	HGSOC	0.470991	0.133337	0.000745145	NA	NA	NA	0.032	NA
TZDs	SLC29A1+RXRB+PPARG	LGSOC	0.349161	0.316839	0.27434	NA	NA	NA	0.851	NA
TZDs	SLC29A1+RXRB+PPARG	Clear cell OC	0.0400289	0.268361	0.881868	NA	NA	NA	0.791	NA
TZDs	SLC29A1+RXRB+PPARG	Mucinous OC	-0.0307199	0.225727	0.89215	NA	NA	NA	0.333	NA
TZDs	SLC29A1+RXRB+PPARG	Endometrioid OC	-0.447985	0.221943	0.047489	NA	NA	NA	0.227	NA
TZDs	SLC29A1+RXRB+PPARG	HGSOC (Survival)	-0.350373	0.185919	0.0637664	NA	NA	NA	0.001	NA
TZDs	SLC29A1+RXRB+PPARG	All OC (Histology Unadjusted)	0.066091	0.136079	0.628754	NA	NA	NA	0.217	NA
TZDs	SLC29A1+RXRB+PPARG	All OC (Histology Adjusted)	-0.151219	0.143961	0.297244	NA	NA	NA	0.071	NA
DDP4i	HMGCR+ITGAL	All OC	0.113548	0.199148	0.582517	NA	NA	NA	0.862	NA
DDP4i	HMGCR+ITGAL	HGSOC	-0.267228	0.318907	0.423752	NA	NA	NA	0.509	NA
DDP4i	HMGCR+ITGAL	LGSOC	-0.906627	0.742627	0.253165	NA	NA	NA	0.85	NA
DDP4i	HMGCR+ITGAL	Clear cell OC	-0.841795	0.792909	0.316049	NA	NA	NA	0.497	NA
DDP4i	HMGCR+ITGAL	Mucinous OC	1.86942	0.326635	0.000285769	NA	NA	NA	0.981	NA
DDP4i	HMGCR+ITGAL	Endometrioid OC	3.11289	0.821801	0.0042966	NA	NA	NA	0.062	NA
DDP4i	HMGCR+ITGAL	HGSOC (Survival)	0.403964	0.222444	0.102749	NA	NA	NA	0.977	NA
DDP4i	HMGCR+ITGAL	All OC (Histology Unadjusted)	-0.0252385	0.261699	0.925284	NA	NA	NA	0.844	NA
DDP4i	HMGCR+ITGAL	All OC (Histology Adjusted)	0.190094	0.21122	0.391576	NA	NA	NA	0.958	NA
SGLT2i	SLC5A1+SLC5A2	All OC	-0.303365	0.1496	0.0554534	NA	NA	NA	0.923	NA
SGLT2i	SLC5A1+SLC5A2	HGSOC	-0.607917	0.255621	0.0269694	NA	NA	NA	0.301	NA
SGLT2i	SLC5A1+SLC5A2	LGSOC	-0.858295	0.806918	0.299556	NA	NA	NA	0.128	NA
SGLT2i	SLC5A1+SLC5A2	Clear cell OC	-0.109614	0.410812	0.792208	NA	NA	NA	0.981	NA
SGLT2i	SLC5A1+SLC5A2	Mucinous OC	0.303158	0.555424	0.590946	NA	NA	NA	0.049	NA
SGLT2i	SLC5A1+SLC5A2	Endometrioid OC	0.606594	0.428471	0.171519	NA	NA	NA	0.474	NA
SGLT2i	SLC5A1+SLC5A2	HGSOC (Survival)	-0.0857286	0.222918	0.704419	NA	NA	NA	0.966	NA
SGLT2i	SLC5A1+SLC5A2	All OC (Histology Unadjusted)	-0.275448	0.163294	0.106438	NA	NA	NA	0.99	NA
SGLT2i	SLC5A1+SLC5A2	All OC (Histology Adjusted)	-0.189097	0.192574	0.337307	NA	NA	NA	0.954	NA
This table presents the results from the MR-PRESSO analysis, which evaluates the effects of genetic variations associated with drug targets on various ovarian cancer phenotypes. The data provided includes raw effect size estimates (Beta), standard errors, and p-values, indicating the significance of these findings. Additionally, results after correcting for outliers are also calculated however un…

## Sheet: Table S9
Table of SMR analysis
Drug	Outcome	Resource	probeID	ProbeChr	Probe_bp	Gene	topSNP	topSNP_chr	topSNP_bp	A1	A2	Freq	b_SMR	se_SMR	p_SMR	nsnp_HEIDI	p_HEIDI	OR	95%CI	Significance
Sulfonylureas	All OC	eQTLGen	ENSG00000165029	9	107616900	ABCA1	rs2487046	9	107692229	A	G	0.411531	0.0439384	0.132587	0.740347	18	0.819293	1.04492	0.81~1.36
Sulfonylureas	All OC (Histology Adjusted)	eQTLGen	ENSG00000165029	9	107616900	ABCA1	rs2487046	9	107692229	A	G	0.411531	-0.2444	0.175894	0.164688	18	0.132893	0.783174	0.55~1.11
Sulfonylureas	All OC (Histology Unadjusted)	eQTLGen	ENSG00000165029	9	107616900	ABCA1	rs2487046	9	107692229	A	G	0.411531	-0.209828	0.174958	0.230411	18	0.149014	0.810724	0.58~1.14
Sulfonylureas	Clear cell OC	eQTLGen	ENSG00000165029	9	107616900	ABCA1	rs2487046	9	107692229	A	G	0.411531	0.405386	0.401348	0.312467	18	0.465493	1.49988	0.68~3.29
Sulfonylureas	Endometrioid OC	eQTLGen	ENSG00000165029	9	107616900	ABCA1	rs2487046	9	107692229	A	G	0.411531	0.151984	0.287162	0.596624	18	0.324351	1.16414	0.66~2.04
Sulfonylureas	HGSOC	eQTLGen	ENSG00000165029	9	107616900	ABCA1	rs2487046	9	107692229	A	G	0.411531	-0.0707821	0.157825	0.653803	18	0.999598	0.931665	0.68~1.27
Sulfonylureas	HGSOC (Survival)	eQTLGen	ENSG00000165029	9	107616900	ABCA1	rs2487046	9	107692229	A	G	0.411531	-0.125456	0.205843	0.542211	18	0.145033	0.882095	0.59~1.32
Sulfonylureas	LGSOC	eQTLGen	ENSG00000165029	9	107616900	ABCA1	rs2487046	9	107692229	A	G	0.411531	1.53516	0.494494	0.00190596	18	0.121496	4.64207	1.76~12.24	*
Sulfonylureas	Mucinous OC	eQTLGen	ENSG00000165029	9	107616900	ABCA1	rs2487046	9	107692229	A	G	0.411531	-0.292859	0.299465	0.328104	18	0.340641	0.746127	0.41~1.34
Sulfonylureas	Glucose	eQTLGen	ENSG00000165029	9	107616900	ABCA1	rs2487046	9	107692229	A	G	0.411531	0.0651759	0.0407997	0.110164	19	0.599352	1.06735	0.99~1.16
Sulfonylureas	T2DM	eQTLGen	ENSG00000165029	9	107616900	ABCA1	rs2487046	9	107692229	A	G	0.411531	0.140779	0.0773863	0.0688851	17	0.511184	1.15117	0.99~1.34
Other drugs	All OC	eQTLGen	ENSG00000117448	1	46025968	AKR1A1	rs518365	1	46010652	G	A	0.480119	0.00355349	0.13672	0.979265	19	0.551027	1.00356	0.77~1.31
Other drugs	All OC (Histology Adjusted)	eQTLGen	ENSG00000117448	1	46025968	AKR1A1	rs518365	1	46010652	G	A	0.480119	0.0105502	0.181437	0.953631	19	0.0609908	1.01061	0.71~1.44
Other drugs	All OC (Histology Unadjusted)	eQTLGen	ENSG00000117448	1	46025968	AKR1A1	rs518365	1	46010652	G	A	0.480119	-0.0534929	0.18087	0.767418	19	0.0231223	0.947913	0.66~1.35
Other drugs	Clear cell OC	eQTLGen	ENSG00000117448	1	46025968	AKR1A1	rs518365	1	46010652	G	A	0.480119	0.693595	0.417452	0.096614	19	0.356372	2.0009	0.88~4.53
Other drugs	Endometrioid OC	eQTLGen	ENSG00000117448	1	46025968	AKR1A1	rs518365	1	46010652	G	A	0.480119	-0.224192	0.29678	0.449999	19	0.827822	0.799162	0.45~1.43
Other drugs	HGSOC	eQTLGen	ENSG00000117448	1	46025968	AKR1A1	rs518365	1	46010652	G	A	0.480119	0.0391718	0.162509	0.809521	19	0.454236	1.03995	0.76~1.43
Other drugs	HGSOC (Survival)	eQTLGen	ENSG00000117448	1	46025968	AKR1A1	rs518365	1	46010652	G	A	0.480119	0.170102	0.212493	0.423418	19	0.346341	1.18543	0.78~1.80
Other drugs	LGSOC	eQTLGen	ENSG00000117448	1	46025968	AKR1A1	rs518365	1	46010652	G	A	0.480119	-0.763037	0.500425	0.127315	19	0.791105	0.466248	0.17~1.24
Other drugs	Mucinous OC	eQTLGen	ENSG00000117448	1	46025968	AKR1A1	rs518365	1	46010652	G	A	0.480119	0.121369	0.309146	0.694619	19	0.261678	1.12904	0.62~2.07
Other drugs	Glucose	eQTLGen	ENSG00000117448	1	46025968	AKR1A1	rs518365	1	46010652	G	A	0.480119	0.141114	0.0446581	0.00157833	18	0.153526	1.15156	1.06~1.26	*
Other drugs	T2DM	eQTLGen	ENSG00000117448	1	46025968	AKR1A1	rs518365	1	46010652	G	A	0.480119	0.169999	0.0825781	0.0395286	17	0.393638	1.1853	1.01~1.39	*
Other drugs	All OC	eQTLGen	ENSG00000085662	7	134135569	AKR1B1	rs782878	7	134233011	G	A	0.402584	0.010387	0.0497223	0.834526	19	0.127516	1.01044	0.92~1.11
Other drugs	All OC (Histology Adjusted)	eQTLGen	ENSG00000085662	7	134135569	AKR1B1	rs782878	7	134233011	G	A	0.402584	-0.0132723	0.0659455	0.840494	19	0.433117	0.986815	0.87~1.12
Other drugs	All OC (Histology Unadjusted)	eQTLGen	ENSG00000085662	7	134135569	AKR1B1	rs782878	7	134233011	G	A	0.402584	-0.0133594	0.0656189	0.838673	19	0.155977	0.986729	0.87~1.12
Other drugs	Clear cell OC	eQTLGen	ENSG00000085662	7	134135569	AKR1B1	rs782878	7	134233011	G	A	0.402584	-0.12786	0.150375	0.395173	19	0.798444	0.879977	0.66~1.18
Other drugs	Endometrioid OC	eQTLGen	ENSG00000085662	7	134135569	AKR1B1	rs782878	7	134233011	G	A	0.402584	0.119948	0.108359	0.268315	19	0.323062	1.12744	0.91~1.39
Other drugs	HGSOC	eQTLGen	ENSG00000085662	7	134135569	AKR1B1	rs782878	7	134233011	G	A	0.402584	0.0208394	0.0592334	0.724974	19	0.443182	1.02106	0.91~1.15
Other drugs	HGSOC (Survival)	eQTLGen	ENSG00000085662	7	134135569	AKR1B1	rs782878	7	134233011	G	A	0.402584	0.0648192	0.0774377	0.402565	19	0.836348	1.06697	0.92~1.24
Other drugs	LGSOC	eQTLGen	ENSG00000085662	7	134135569	AKR1B1	rs782878	7	134233011	G	A	0.402584	0.0423176	0.179473	0.813597	19	0.59206	1.04323	0.73~1.48
Other drugs	Mucinous OC	eQTLGen	ENSG00000085662	7	134135569	AKR1B1	rs782878	7	134233011	G	A	0.402584	-0.220008	0.112669	0.0508557	19	0.152395	0.802512	0.64~1.00
Other drugs	Glucose	eQTLGen	ENSG00000085662	7	134135569	AKR1B1	rs73164856	7	134233851	T	C	0.392644	0.0147672	0.0150195	0.325508	20	0.0416119	1.01488	0.99~1.05
Other drugs	T2DM	eQTLGen	ENSG00000085662	7	134135569	AKR1B1	rs7812163	7	134231640	A	G	0.441352	0.00515955	0.029115	0.859341	18	0.1946	1.00517	0.95~1.06
Insulin	All OC	eQTLGen	ENSG00000136999	8	120432569	CCN3	rs11786546	8	120497869	G	A	0.421471	0.0902591	0.219593	0.681051	14	0.338706	1.09446	0.71~1.68
Insulin	All OC (Histology Adjusted)	eQTLGen	ENSG00000136999	8	120432569	CCN3	rs11786546	8	120497869	G	A	0.421471	-0.190626	0.287537	0.507356	14	0.633374	0.826442	0.47~1.45
Insulin	All OC (Histology Unadjusted)	eQTLGen	ENSG00000136999	8	120432569	CCN3	rs11786546	8	120497869	G	A	0.421471	-0.241492	0.286731	0.399662	14	0.516374	0.785455	0.45~1.38
Insulin	Clear cell OC	eQTLGen	ENSG00000136999	8	120432569	CCN3	rs11786546	8	120497869	G	A	0.421471	0.788512	0.674135	0.242136	14	0.95172	2.20012	0.59~8.25
Insulin	Endometrioid OC	eQTLGen	ENSG00000136999	8	120432569	CCN3	rs11786546	8	120497869	G	A	0.421471	-0.370222	0.478413	0.439016	14	0.230377	0.690581	0.27~1.76
Insulin	HGSOC	eQTLGen	ENSG00000136999	8	120432569	CCN3	rs11786546	8	120497869	G	A	0.421471	0.068217	0.260908	0.793738	14	0.209273	1.0706	0.64~1.79
Insulin	HGSOC (Survival)	eQTLGen	ENSG00000136999	8	120432569	CCN3	rs11786546	8	120497869	G	A	0.421471	0.223055	0.336452	0.507354	14	0.626801	1.24989	0.65~2.42
Insulin	LGSOC	eQTLGen	ENSG00000136999	8	120432569	CCN3	rs11786546	8	120497869	G	A	0.421471	-0.657972	0.798689	0.410045	14	0.700779	0.517901	0.11~2.48
Insulin	Mucinous OC	eQTLGen	ENSG00000136999	8	120432569	CCN3	rs11786546	8	120497869	G	A	0.421471	0.656984	0.505148	0.193403	14	0.794525	1.92897	0.72~5.19
Insulin	Glucose	eQTLGen	ENSG00000136999	8	120432569	CCN3	rs11786546	8	120497869	G	A	0.421471	0.0510745	0.0693191	0.461242	14	0.406795	1.0524	0.92~1.21
Insulin	T2DM	eQTLGen	ENSG00000136999	8	120432569	CCN3	rs11786546	8	120497869	G	A	0.421471	-0.0938313	0.130636	0.472595	12	0.16657	0.910436	0.70~1.18
Other drugs	All OC	eQTLGen	ENSG00000198851	11	118181075	CD3E	rs10892234	11	118194571	G	A	0.426441	-0.176256	0.200394	0.379105	11	0.741866	0.838403	0.57~1.24
Other drugs	All OC (Histology Adjusted)	eQTLGen	ENSG00000198851	11	118181075	CD3E	rs10892234	11	118194571	G	A	0.426441	0.384269	0.266606	0.14949	11	0.182402	1.46854	0.87~2.48
Other drugs	All OC (Histology Unadjusted)	eQTLGen	ENSG00000198851	11	118181075	CD3E	rs10892234	11	118194571	G	A	0.426441	0.268353	0.263837	0.309098	11	0.272384	1.30781	0.78~2.19
Other drugs	Clear cell OC	eQTLGen	ENSG00000198851	11	118181075	CD3E	rs10892234	11	118194571	G	A	0.426441	-0.171636	0.605312	0.776755	11	0.041017	0.842286	0.26~2.76
Other drugs	Endometrioid OC	eQTLGen	ENSG00000198851	11	118181075	CD3E	rs10892234	11	118194571	G	A	0.426441	0.125458	0.433015	0.772023	11	0.442516	1.13367	0.49~2.65
Other drugs	HGSOC	eQTLGen	ENSG00000198851	11	118181075	CD3E	rs10892234	11	118194571	G	A	0.426441	-0.226491	0.238331	0.34195	11	0.720642	0.797327	0.50~1.27
Other drugs	HGSOC (Survival)	eQTLGen	ENSG00000198851	11	118181075	CD3E	rs10892234	11	118194571	G	A	0.426441	0.567165	0.314548	0.071371	11	0.164865	1.76326	0.95~3.27
Other drugs	LGSOC	eQTLGen	ENSG00000198851	11	118181075	CD3E	rs10892234	11	118194571	G	A	0.426441	-0.144931	0.724704	0.841491	11	0.320119	0.865082	0.21~3.58
Other drugs	Mucinous OC	eQTLGen	ENSG00000198851	11	118181075	CD3E	rs10892234	11	118194571	G	A	0.426441	-0.185494	0.453346	0.682417	11	0.81918	0.830694	0.34~2.02
Other drugs	Glucose	eQTLGen	ENSG00000198851	11	118181075	CD3E	rs10892234	11	118194571	G	A	0.426441	0.0539075	0.0606539	0.374126	11	0.141663	1.05539	0.94~1.19
Other drugs	T2DM	eQTLGen	ENSG00000198851	11	118181075	CD3E	rs10892234	11	118194571	G	A	0.426441	0.0332013	0.114104	0.771071	11	0.410017	1.03376	0.83~1.29
Sulfonylureas	All OC	eQTLGen	ENSG00000110090	11	68566983	CPT1A	rs10750830	11	68433262	C	T	0.414513	-0.0297367	0.0796083	0.708748	7	0.114777	0.970701	0.83~1.13
Sulfonylureas	All OC (Histology Adjusted)	eQTLGen	ENSG00000110090	11	68566983	CPT1A	rs10750830	11	68433262	C	T	0.414513	0.0838332	0.104524	0.422526	7	0.280399	1.08745	0.89~1.33
Sulfonylureas	All OC (Histology Unadjusted)	eQTLGen	ENSG00000110090	11	68566983	CPT1A	rs10750830	11	68433262	C	T	0.414513	0.0926517	0.103969	0.37285	7	0.489874	1.09708	0.89~1.35
Sulfonylureas	Clear cell OC	eQTLGen	ENSG00000110090	11	68566983	CPT1A	rs10750830	11	68433262	C	T	0.414513	-0.203112	0.242874	0.402993	7	0.058333	0.816187	0.51~1.31
Sulfonylureas	Endometrioid OC	eQTLGen	ENSG00000110090	11	68566983	CPT1A	rs10750830	11	68433262	C	T	0.414513	-0.00935106	0.172477	0.956763	7	0.390314	0.990693	0.71~1.39
Sulfonylureas	HGSOC	eQTLGen	ENSG00000110090	11	68566983	CPT1A	rs10750830	11	68433262	C	T	0.414513	-0.008097	0.0946567	0.931832	7	0.220826	0.991936	0.82~1.19
Sulfonylureas	HGSOC (Survival)	eQTLGen	ENSG00000110090	11	68566983	CPT1A	rs10750830	11	68433262	C	T	0.414513	0.060298	0.122061	0.621308	7	0.11394	1.06215	0.84~1.35
Sulfonylureas	LGSOC	eQTLGen	ENSG00000110090	11	68566983	CPT1A	rs10750830	11	68433262	C	T	0.414513	-0.0627031	0.289767	0.828682	7	0.603015	0.939222	0.53~1.66
Sulfonylureas	Mucinous OC	eQTLGen	ENSG00000110090	11	68566983	CPT1A	rs10750830	11	68433262	C	T	0.414513	-0.0994087	0.180326	0.581448	7	0.525413	0.905373	0.64~1.29
Sulfonylureas	Glucose	eQTLGen	ENSG00000110090	11	68566983	CPT1A	rs10750830	11	68433262	C	T	0.414513	0.0245562	0.0240317	0.306862	7	0.948193	1.02486	0.98~1.07
Sulfonylureas	T2DM	eQTLGen	ENSG00000110090	11	68566983	CPT1A	rs4531478	11	68482489	A	G	0.441352	0.0802591	0.0502514	0.110231	10	0.325737	1.08357	0.98~1.20
DPP4i	All OC	eQTLGen	ENSG00000197635	2	162889901	DPP4	rs12469968	2	162923917	G	A	0.485089	2.34081e-05	0.138642	0.999865	4	0.786306	1.00002	0.76~1.31
DPP4i	All OC (Histology Adjusted)	eQTLGen	ENSG00000197635	2	162889901	DPP4	rs12469968	2	162923917	G	A	0.485089	-0.292405	0.185211	0.11439	4	0.511081	0.746466	0.52~1.07
DPP4i	All OC (Histology Unadjusted)	eQTLGen	ENSG00000197635	2	162889901	DPP4	rs12469968	2	162923917	G	A	0.485089	-0.26609	0.184581	0.149417	4	0.278207	0.76637	0.53~1.10
DPP4i	Clear cell OC	eQTLGen	ENSG00000197635	2	162889901	DPP4	rs12469968	2	162923917	G	A	0.485089	-0.371937	0.418498	0.374142	4	0.35855	0.689398	0.30~1.57
DPP4i	Endometrioid OC	eQTLGen	ENSG00000197635	2	162889901	DPP4	rs12469968	2	162923917	G	A	0.485089	-0.0263734	0.299481	0.929826	4	0.581646	0.973971	0.54~1.75
DPP4i	HGSOC	eQTLGen	ENSG00000197635	2	162889901	DPP4	rs12469968	2	162923917	G	A	0.485089	-0.0661691	0.16484	0.688116	4	0.595403	0.935973	0.68~1.29
DPP4i	HGSOC (Survival)	eQTLGen	ENSG00000197635	2	162889901	DPP4	rs12469968	2	162923917	G	A	0.485089	-0.533555	0.218907	0.0147949	4	0.590747	0.586516	0.38~0.90	*
DPP4i	LGSOC	eQTLGen	ENSG00000197635	2	162889901	DPP4	rs12469968	2	162923917	G	A	0.485089	0.553487	0.49987	0.26818	4	0.635288	1.73931	0.65~4.63
DPP4i	Mucinous OC	eQTLGen	ENSG00000197635	2	162889901	DPP4	rs12469968	2	162923917	G	A	0.485089	0.360253	0.315157	0.253001	4	0.488631	1.43369	0.77~2.66
DPP4i	Glucose	eQTLGen	ENSG00000197635	2	162889901	DPP4	rs12469968	2	162923917	G	A	0.485089	-0.00752656	0.0413118	0.855434	3	0.862946	0.992502	0.92~1.08
DPP4i	T2DM	eQTLGen	ENSG00000197635	2	162889901	DPP4	rs2075340	2	162933561	T	A	0.45825	-0.10732	0.0820052	0.190637	NA	NA	0.898238	0.76~1.05
Biguanides	All OC	eQTLGen	ENSG00000171503	4	159612026	ETFDH	rs12644851	4	159608162	A	G	0.494036	-0.259545	0.104272	0.0128057	7	0.0626257	0.771402	0.63~0.95	*
Biguanides	All OC (Histology Adjusted)	eQTLGen	ENSG00000171503	4	159612026	ETFDH	rs12644851	4	159608162	A	G	0.494036	-0.216203	0.137329	0.115408	7	0.190718	0.805572	0.62~1.05
Biguanides	All OC (Histology Unadjusted)	eQTLGen	ENSG00000171503	4	159612026	ETFDH	rs12644851	4	159608162	A	G	0.494036	-0.104065	0.135731	0.443258	7	0.422536	0.901167	0.69~1.18
Biguanides	Clear cell OC	eQTLGen	ENSG00000171503	4	159612026	ETFDH	rs12644851	4	159608162	A	G	0.494036	-0.43037	0.309454	0.164304	7	0.144531	0.650268	0.35~1.19
Biguanides	Endometrioid OC	eQTLGen	ENSG00000171503	4	159612026	ETFDH	rs12644851	4	159608162	A	G	0.494036	-0.426297	0.223612	0.0565963	7	0.151252	0.652922	0.42~1.01
Biguanides	HGSOC	eQTLGen	ENSG00000171503	4	159612026	ETFDH	rs12644851	4	159608162	A	G	0.494036	-0.306596	0.123796	0.0132629	7	0.225182	0.735948	0.58~0.94	*
Biguanides	HGSOC (Survival)	eQTLGen	ENSG00000171503	4	159612026	ETFDH	rs12644851	4	159608162	A	G	0.494036	-0.346594	0.161429	0.0317906	7	0.102715	0.707092	0.52~0.97	*
Biguanides	LGSOC	eQTLGen	ENSG00000171503	4	159612026	ETFDH	rs12644851	4	159608162	A	G	0.494036	0.107701	0.369643	0.770772	7	0.693759	1.11371	0.54~2.30
Biguanides	Mucinous OC	eQTLGen	ENSG00000171503	4	159612026	ETFDH	rs12644851	4	159608162	A	G	0.494036	-0.448041	0.233894	0.05542	7	0.440064	0.638878	0.40~1.01
Biguanides	Glucose	eQTLGen	ENSG00000171503	4	159612026	ETFDH	rs12644851	4	159608162	A	G	0.494036	-0.0389916	0.0303494	0.198877	9	0.67389	0.961759	0.91~1.02
Biguanides	T2DM	eQTLGen	ENSG00000171503	4	159612026	ETFDH	rs12644851	4	159608162	A	G	0.494036	0.0247255	0.0574741	0.667048	6	0.653434	1.02503	0.92~1.15
AGI	All OC	eQTLGen	ENSG00000171298	17	78084516	GAA	rs4889830	17	78114528	G	A	0.424453	-0.0288918	0.0243795	0.235984	11	0.906647	0.971522	0.93~1.02
AGI	All OC (Histology Adjusted)	eQTLGen	ENSG00000171298	17	78084516	GAA	rs4889830	17	78114528	G	A	0.424453	-0.0447327	0.031963	0.161659	11	0.591214	0.956253	0.90~1.02
AGI	All OC (Histology Unadjusted)	eQTLGen	ENSG00000171298	17	78084516	GAA	rs4889830	17	78114528	G	A	0.424453	-0.039795	0.0319434	0.212839	11	0.477196	0.960986	0.90~1.02
AGI	Clear cell OC	eQTLGen	ENSG00000171298	17	78084516	GAA	rs4889830	17	78114528	G	A	0.424453	-0.0597476	0.0737758	0.418025	11	0.279953	0.942002	0.82~1.09
AGI	Endometrioid OC	eQTLGen	ENSG00000171298	17	78084516	GAA	rs4889830	17	78114528	G	A	0.424453	-0.0157106	0.0529932	0.766875	11	0.429253	0.984412	0.89~1.09
AGI	HGSOC	eQTLGen	ENSG00000171298	17	78084516	GAA	rs4889830	17	78114528	G	A	0.424453	-0.0265606	0.0289675	0.359189	11	0.993039	0.973789	0.92~1.03
AGI	HGSOC (Survival)	eQTLGen	ENSG00000171298	17	78084516	GAA	rs4889830	17	78114528	G	A	0.424453	-0.0590685	0.0372707	0.113001	11	0.754948	0.942642	0.88~1.01
AGI	LGSOC	eQTLGen	ENSG00000171298	17	78084516	GAA	rs4889830	17	78114528	G	A	0.424453	-0.0960918	0.08797	0.274691	11	0.21671	0.908381	0.76~1.08
AGI	Mucinous OC	eQTLGen	ENSG00000171298	17	78084516	GAA	rs4889830	17	78114528	G	A	0.424453	-0.0366195	0.0552895	0.507764	11	0.196275	0.964043	0.87~1.07
AGI	Glucose	eQTLGen	ENSG00000171298	17	78084516	GAA	rs1561812	17	78061027	C	T	0.393638	0.0028322	0.00748938	0.70531	12	0.561146	1.00284	0.99~1.02
AGI	T2DM	eQTLGen	ENSG00000171298	17	78084516	GAA	rs1561812	17	78061027	C	T	0.393638	-0.0170318	0.0141949	0.230197	7	0.0344032	0.983112	0.96~1.01
AGI	All OC	eQTLGen	ENSG00000089597	11	62403201	GANAB	rs7948536	11	62586893	G	C	0.426441	-0.14184	0.16522	0.39062	4	0.636717	0.86776	0.63~1.20
AGI	All OC (Histology Adjusted)	eQTLGen	ENSG00000089597	11	62403201	GANAB	rs7948536	11	62586893	G	C	0.426441	0.213549	0.218685	0.328809	4	0.441277	1.23806	0.81~1.90
AGI	All OC (Histology Unadjusted)	eQTLGen	ENSG00000089597	11	62403201	GANAB	rs7948536	11	62586893	G	C	0.426441	0.0603519	0.216397	0.780326	4	0.506488	1.06221	0.70~1.62
AGI	Clear cell OC	eQTLGen	ENSG00000089597	11	62403201	GANAB	rs7948536	11	62586893	G	C	0.426441	-0.082362	0.497011	0.868381	4	0.405466	0.920939	0.35~2.44
AGI	Endometrioid OC	eQTLGen	ENSG00000089597	11	62403201	GANAB	rs7948536	11	62586893	G	C	0.426441	0.48995	0.363317	0.177483	4	0.717377	1.63223	0.80~3.33
AGI	HGSOC	eQTLGen	ENSG00000089597	11	62403201	GANAB	rs7948536	11	62586893	G	C	0.426441	-0.305278	0.199873	0.126671	4	0.304321	0.736918	0.50~1.09
AGI	HGSOC (Survival)	eQTLGen	ENSG00000089597	11	62403201	GANAB	rs7948536	11	62586893	G	C	0.426441	0.243762	0.255583	0.340211	4	0.476396	1.27604	0.77~2.11
AGI	LGSOC	eQTLGen	ENSG00000089597	11	62403201	GANAB	rs7948536	11	62586893	G	C	0.426441	-0.898848	0.60926	0.140129	4	0.257071	0.407038	0.12~1.34
AGI	Mucinous OC	eQTLGen	ENSG00000089597	11	62403201	GANAB	rs7948536	11	62586893	G	C	0.426441	-0.543458	0.378918	0.151504	4	0.660981	0.580737	0.28~1.22
AGI	Glucose	eQTLGen	ENSG00000089597	11	62403201	GANAB	rs7948536	11	62586893	G	C	0.426441	-0.121397	0.0540343	0.0246619	4	0.0524678	0.885682	0.80~0.98	*
AGI	T2DM	eQTLGen	ENSG00000089597	11	62403201	GANAB	rs7948536	11	62586893	G	C	0.426441	-0.180789	0.099406	0.0689587	3	0.0262665	0.834611	0.69~1.01
Other drugs	All OC	eQTLGen	ENSG00000106633	7	44210820	GCK	rs2537184	7	44172278	A	G	0.531809	0.150301	0.135564	0.267557	NA	NA	1.16218	0.89~1.52
Other drugs	All OC (Histology Adjusted)	eQTLGen	ENSG00000106633	7	44210820	GCK	rs2537184	7	44172278	A	G	0.531809	-0.0758634	0.177293	0.668725	NA	NA	0.926943	0.65~1.31
Other drugs	All OC (Histology Unadjusted)	eQTLGen	ENSG00000106633	7	44210820	GCK	rs2537184	7	44172278	A	G	0.531809	0.00195811	0.17667	0.991157	NA	NA	1.00196	0.71~1.42
Other drugs	Clear cell OC	eQTLGen	ENSG00000106633	7	44210820	GCK	rs2537184	7	44172278	A	G	0.531809	0.138386	0.407346	0.734062	NA	NA	1.14842	0.52~2.55
Other drugs	Endometrioid OC	eQTLGen	ENSG00000106633	7	44210820	GCK	rs2537184	7	44172278	A	G	0.531809	-0.219445	0.293569	0.454756	NA	NA	0.802964	0.45~1.43
Other drugs	HGSOC	eQTLGen	ENSG00000106633	7	44210820	GCK	rs2537184	7	44172278	A	G	0.531809	0.043391	0.160311	0.786647	NA	NA	1.04435	0.76~1.43
Other drugs	HGSOC (Survival)	eQTLGen	ENSG00000106633	7	44210820	GCK	rs2537184	7	44172278	A	G	0.531809	-0.01044	0.207337	0.959841	NA	NA	0.989614	0.66~1.49
Other drugs	LGSOC	eQTLGen	ENSG00000106633	7	44210820	GCK	rs2537184	7	44172278	A	G	0.531809	0.922021	0.493175	0.0615444	NA	NA	2.51437	0.96~6.61
Other drugs	Mucinous OC	eQTLGen	ENSG00000106633	7	44210820	GCK	rs2537184	7	44172278	A	G	0.531809	0.0224719	0.306175	0.941491	NA	NA	1.02273	0.56~1.86
Other drugs	Glucose	eQTLGen	ENSG00000106633	7	44210820	GCK	rs2537184	7	44172278	A	G	0.531809	-0.107357	0.0420524	0.0106818	NA	NA	0.898205	0.83~0.98
GLP-1RA	All OC	eQTLGen	ENSG00000112164	6	39036046	GLP1R	rs1018437	6	38814743	C	T	0.383698	0.00073092	0.218701	0.997333	4	0.710142	1.00073	0.65~1.54
GLP-1RA	All OC (Histology Adjusted)	eQTLGen	ENSG00000112164	6	39036046	GLP1R	rs1018437	6	38814743	C	T	0.383698	-0.24797	0.28794	0.389134	4	0.07551	0.780383	0.44~1.37
GLP-1RA	All OC (Histology Unadjusted)	eQTLGen	ENSG00000112164	6	39036046	GLP1R	rs1018437	6	38814743	C	T	0.383698	-0.270827	0.288647	0.348109	4	0.0268068	0.762748	0.43~1.34
GLP-1RA	Clear cell OC	eQTLGen	ENSG00000112164	6	39036046	GLP1R	rs1018437	6	38814743	C	T	0.383698	1.08873	0.680807	0.109781	4	0.609398	2.9705	0.78~11.28
GLP-1RA	Endometrioid OC	eQTLGen	ENSG00000112164	6	39036046	GLP1R	rs1018437	6	38814743	C	T	0.383698	-0.0104549	0.477854	0.982545	4	0.600095	0.9896	0.39~2.52
GLP-1RA	HGSOC	eQTLGen	ENSG00000112164	6	39036046	GLP1R	rs1018437	6	38814743	C	T	0.383698	0.105108	0.260367	0.68644	4	0.422742	1.11083	0.67~1.85
GLP-1RA	HGSOC (Survival)	eQTLGen	ENSG00000112164	6	39036046	GLP1R	rs1018437	6	38814743	C	T	0.383698	-0.432632	0.339769	0.202907	4	0.0740973	0.648799	0.33~1.26
GLP-1RA	LGSOC	eQTLGen	ENSG00000112164	6	39036046	GLP1R	rs1018437	6	38814743	C	T	0.383698	-1.18411	0.808801	0.143186	4	0.375926	0.306018	0.06~1.49
GLP-1RA	Mucinous OC	eQTLGen	ENSG00000112164	6	39036046	GLP1R	rs1018437	6	38814743	C	T	0.383698	-0.760519	0.509524	0.13554	4	0.605353	0.467424	0.17~1.27
GLP-1RA	Glucose	eQTLGen	ENSG00000112164	6	39036046	GLP1R	rs1018437	6	38814743	C	T	0.383698	-0.00739229	0.0685764	0.914157	4	0.734199	0.992635	0.87~1.14
GLP-1RA	T2DM	eQTLGen	ENSG00000112164	6	39036046	GLP1R	rs1018437	6	38814743	C	T	0.383698	0.241722	0.134006	0.0712598	3	0.433401	1.27344	0.98~1.66
TZDs	All OC	eQTLGen	ENSG00000084207	11	67352598	GSTP1	rs11227793	11	67194593	T	C	0.423459	-0.145593	0.241411	0.546448	6	0.68431	0.864509	0.54~1.39
TZDs	All OC (Histology Adjusted)	eQTLGen	ENSG00000084207	11	67352598	GSTP1	rs11227793	11	67194593	T	C	0.423459	-0.155196	0.320545	0.62827	6	0.14803	0.856247	0.46~1.60
TZDs	All OC (Histology Unadjusted)	eQTLGen	ENSG00000084207	11	67352598	GSTP1	rs11227793	11	67194593	T	C	0.423459	-0.248088	0.321096	0.439742	6	0.171632	0.780291	0.42~1.46
TZDs	Clear cell OC	eQTLGen	ENSG00000084207	11	67352598	GSTP1	rs11227793	11	67194593	T	C	0.423459	-0.50851	0.729581	0.48581	6	0.373272	0.601391	0.14~2.51
TZDs	Endometrioid OC	eQTLGen	ENSG00000084207	11	67352598	GSTP1	rs11227793	11	67194593	T	C	0.423459	0.463932	0.524301	0.376234	6	0.463578	1.59031	0.57~4.44
TZDs	HGSOC	eQTLGen	ENSG00000084207	11	67352598	GSTP1	rs11227793	11	67194593	T	C	0.423459	-0.378123	0.291675	0.194843	6	0.523663	0.685146	0.39~1.21
TZDs	HGSOC (Survival)	eQTLGen	ENSG00000084207	11	67352598	GSTP1	rs11227793	11	67194593	T	C	0.423459	0.0273637	0.374447	0.941744	6	0.185365	1.02774	0.49~2.14
TZDs	LGSOC	eQTLGen	ENSG00000084207	11	67352598	GSTP1	rs11227793	11	67194593	T	C	0.423459	-0.304295	0.872602	0.727298	6	0.71702	0.737643	0.13~4.08
TZDs	Mucinous OC	eQTLGen	ENSG00000084207	11	67352598	GSTP1	rs11227793	11	67194593	T	C	0.423459	0.0399971	0.543786	0.941366	6	0.58133	1.04081	0.36~3.02
TZDs	Glucose	eQTLGen	ENSG00000084207	11	67352598	GSTP1	rs11227793	11	67194593	T	C	0.423459	-0.0507967	0.0745353	0.495547	8	0.998655	0.950472	0.82~1.10
DPP4i	All OC	eQTLGen	ENSG00000113161	5	74645041	HMGCR	rs3846662	5	74651084	G	A	0.432406	-0.312808	0.130011	0.0161282	20	0.13043	0.73139	0.57~0.94	*
DPP4i	All OC (Histology Adjusted)	eQTLGen	ENSG00000113161	5	74645041	HMGCR	rs3846662	5	74651084	G	A	0.432406	-0.0430231	0.167919	0.797785	20	0.304963	0.957889	0.69~1.33
DPP4i	All OC (Histology Unadjusted)	eQTLGen	ENSG00000113161	5	74645041	HMGCR	rs3846662	5	74651084	G	A	0.432406	0.00761275	0.167211	0.963687	20	0.37954	1.00764	0.73~1.40
DPP4i	Clear cell OC	eQTLGen	ENSG00000113161	5	74645041	HMGCR	rs3846662	5	74651084	G	A	0.432406	-0.407075	0.3903	0.296958	20	0.295495	0.665594	0.31~1.43
DPP4i	Endometrioid OC	eQTLGen	ENSG00000113161	5	74645041	HMGCR	rs3846662	5	74651084	G	A	0.432406	-0.459563	0.280616	0.101485	20	0.8069	0.63156	0.36~1.09
DPP4i	HGSOC	eQTLGen	ENSG00000113161	5	74645041	HMGCR	rs3846662	5	74651084	G	A	0.432406	-0.191235	0.152681	0.210383	20	0.432712	0.825938	0.61~1.11
DPP4i	HGSOC (Survival)	eQTLGen	ENSG00000113161	5	74645041	HMGCR	rs3846662	5	74651084	G	A	0.432406	-0.031879	0.196075	0.870845	20	0.522532	0.968624	0.66~1.42
DPP4i	LGSOC	eQTLGen	ENSG00000113161	5	74645041	HMGCR	rs3846662	5	74651084	G	A	0.432406	0.0552962	0.466723	0.905689	20	0.112005	1.05685	0.42~2.64
DPP4i	Mucinous OC	eQTLGen	ENSG00000113161	5	74645041	HMGCR	rs3846662	5	74651084	G	A	0.432406	-1.01117	0.301763	0.000805527	20	0.375589	0.363793	0.20~0.66	**
DPP4i	Glucose	eQTLGen	ENSG00000113161	5	74645041	HMGCR	rs3846662	5	74651084	G	A	0.432406	-0.0155596	0.0404638	0.700584	19	0.467202	0.984561	0.91~1.07
DPP4i	T2DM	eQTLGen	ENSG00000113161	5	74645041	HMGCR	rs3846662	5	74651084	G	A	0.432406	0.222883	0.0715705	0.00184461	18	0.0105699	1.24967	1.09~1.44	**
Insulin	All OC	eQTLGen	ENSG00000140443	15	99349979	IGF1R	rs733710	15	99513231	C	T	0.39662	0.131061	0.119764	0.273812	17	0.680422	1.14004	0.90~1.44
Insulin	All OC (Histology Adjusted)	eQTLGen	ENSG00000140443	15	99349979	IGF1R	rs733710	15	99513231	C	T	0.39662	-0.0448788	0.158464	0.777014	17	0.784623	0.956113	0.70~1.30
Insulin	All OC (Histology Unadjusted)	eQTLGen	ENSG00000140443	15	99349979	IGF1R	rs733710	15	99513231	C	T	0.39662	-0.0953883	0.157721	0.545317	17	0.134733	0.90902	0.67~1.24
Insulin	Clear cell OC	eQTLGen	ENSG00000140443	15	99349979	IGF1R	rs733710	15	99513231	C	T	0.39662	0.38846	0.361091	0.282018	17	0.309868	1.47471	0.73~2.99
Insulin	Endometrioid OC	eQTLGen	ENSG00000140443	15	99349979	IGF1R	rs733710	15	99513231	C	T	0.39662	0.138667	0.258316	0.591398	17	0.371895	1.14874	0.69~1.91
Insulin	HGSOC	eQTLGen	ENSG00000140443	15	99349979	IGF1R	rs733710	15	99513231	C	T	0.39662	0.105181	0.142391	0.460105	17	0.959926	1.11091	0.84~1.47
Insulin	HGSOC (Survival)	eQTLGen	ENSG00000140443	15	99349979	IGF1R	rs733710	15	99513231	C	T	0.39662	-0.0531149	0.186099	0.775329	17	0.686388	0.948271	0.66~1.37
Insulin	LGSOC	eQTLGen	ENSG00000140443	15	99349979	IGF1R	rs733710	15	99513231	C	T	0.39662	-0.61727	0.431263	0.152342	17	0.023565	0.539415	0.23~1.26
Insulin	Mucinous OC	eQTLGen	ENSG00000140443	15	99349979	IGF1R	rs733710	15	99513231	C	T	0.39662	0.010282	0.268942	0.969503	17	0.155105	1.01034	0.60~1.71
Insulin	Glucose	eQTLGen	ENSG00000140443	15	99349979	IGF1R	rs733710	15	99513231	C	T	0.39662	0.0660852	0.0368403	0.0728404	19	0.450795	1.06832	0.99~1.15
Insulin	T2DM	eQTLGen	ENSG00000140443	15	99349979	IGF1R	rs733710	15	99513231	C	T	0.39662	0.00699456	0.068199	0.918311	15	0.331903	1.00702	0.88~1.15
Insulin	All OC	eQTLGen	ENSG00000163453	4	57936745	IGFBP7	rs1713957	4	57923517	A	G	0.415507	0.019107	0.0699308	0.784679	20	0.244725	1.01929	0.89~1.17
Insulin	All OC (Histology Adjusted)	eQTLGen	ENSG00000163453	4	57936745	IGFBP7	rs1713957	4	57923517	A	G	0.415507	-0.0338778	0.0922122	0.713328	20	0.123034	0.96669	0.81~1.16
Insulin	All OC (Histology Unadjusted)	eQTLGen	ENSG00000163453	4	57936745	IGFBP7	rs1713957	4	57923517	A	G	0.415507	-0.0600033	0.0921316	0.514867	20	0.0915291	0.941761	0.79~1.13
Insulin	Clear cell OC	eQTLGen	ENSG00000163453	4	57936745	IGFBP7	rs1713957	4	57923517	A	G	0.415507	0.172413	0.21083	0.413483	20	0.562439	1.18817	0.79~1.80
Insulin	Endometrioid OC	eQTLGen	ENSG00000163453	4	57936745	IGFBP7	rs1713957	4	57923517	A	G	0.415507	0.0262702	0.151227	0.86209	20	0.490277	1.02662	0.76~1.38
Insulin	HGSOC	eQTLGen	ENSG00000163453	4	57936745	IGFBP7	rs1713957	4	57923517	A	G	0.415507	-0.00288233	0.0831055	0.972333	20	0.210968	0.997122	0.85~1.17
Insulin	HGSOC (Survival)	eQTLGen	ENSG00000163453	4	57936745	IGFBP7	rs1713957	4	57923517	A	G	0.415507	-0.0157425	0.107915	0.884017	20	0.0909648	0.984381	0.80~1.22
Insulin	LGSOC	eQTLGen	ENSG00000163453	4	57936745	IGFBP7	rs1713957	4	57923517	A	G	0.415507	0.122384	0.252726	0.628205	20	0.48051	1.13019	0.69~1.85
Insulin	Mucinous OC	eQTLGen	ENSG00000163453	4	57936745	IGFBP7	rs1713957	4	57923517	A	G	0.415507	0.0519925	0.157956	0.742036	20	0.216131	1.05337	0.77~1.44
Insulin	Glucose	eQTLGen	ENSG00000163453	4	57936745	IGFBP7	rs1713957	4	57923517	A	G	0.415507	0.0112633	0.0218925	0.606915	20	0.87158	1.01133	0.97~1.06
Insulin	T2DM	eQTLGen	ENSG00000163453	4	57936745	IGFBP7	rs1713957	4	57923517	A	G	0.415507	0.0656367	0.0414352	0.113175	20	0.506522	1.06784	0.98~1.16
Insulin	All OC	eQTLGen	ENSG00000171105	19	7203155	INSR	rs8109308	19	7259428	C	A	0.419483	-0.134743	0.267695	0.614721	NA	NA	0.87394	0.52~1.48
Insulin	All OC (Histology Adjusted)	eQTLGen	ENSG00000171105	19	7203155	INSR	rs8109308	19	7259428	C	A	0.419483	0.346787	0.354759	0.328309	NA	NA	1.41452	0.71~2.84
Insulin	All OC (Histology Unadjusted)	eQTLGen	ENSG00000171105	19	7203155	INSR	rs8109308	19	7259428	C	A	0.419483	0.0870672	0.349546	0.803294	NA	NA	1.09097	0.55~2.16
Insulin	Clear cell OC	eQTLGen	ENSG00000171105	19	7203155	INSR	rs8109308	19	7259428	C	A	0.419483	-0.0910766	0.805823	0.910012	NA	NA	0.912948	0.19~4.43
Insulin	Endometrioid OC	eQTLGen	ENSG00000171105	19	7203155	INSR	rs8109308	19	7259428	C	A	0.419483	0.351537	0.580698	0.544933	NA	NA	1.42125	0.46~4.44
Insulin	HGSOC	eQTLGen	ENSG00000171105	19	7203155	INSR	rs8109308	19	7259428	C	A	0.419483	-0.505644	0.32754	0.122646	NA	NA	0.603117	0.32~1.15
Insulin	HGSOC (Survival)	eQTLGen	ENSG00000171105	19	7203155	INSR	rs8109308	19	7259428	C	A	0.419483	0.407403	0.415616	0.326968	NA	NA	1.50291	0.67~3.39
Insulin	LGSOC	eQTLGen	ENSG00000171105	19	7203155	INSR	rs8109308	19	7259428	C	A	0.419483	0.886064	0.977597	0.364741	NA	NA	2.42556	0.36~16.48
Insulin	Mucinous OC	eQTLGen	ENSG00000171105	19	7203155	INSR	rs8109308	19	7259428	C	A	0.419483	0.186657	0.604843	0.757623	NA	NA	1.20521	0.37~3.94
Insulin	Glucose	eQTLGen	ENSG00000171105	19	7203155	INSR	rs8109308	19	7259428	C	A	0.419483	-0.0956689	0.0827973	0.247903	NA	NA	0.908765	0.77~1.07
DPP4i	All OC	eQTLGen	ENSG00000005844	16	30509242	ITGAL	rs11574938	16	30485393	G	C	0.441352	-0.0248768	0.0667779	0.709498	19	0.686565	0.97543	0.86~1.11
DPP4i	All OC (Histology Adjusted)	eQTLGen	ENSG00000005844	16	30509242	ITGAL	rs11574938	16	30485393	G	C	0.441352	-0.164505	0.0875437	0.0602285	19	0.891737	0.848314	0.71~1.01
DPP4i	All OC (Histology Unadjusted)	eQTLGen	ENSG00000005844	16	30509242	ITGAL	rs11574938	16	30485393	G	C	0.441352	-0.155541	0.0872296	0.0745668	19	0.551652	0.855952	0.72~1.02
DPP4i	Clear cell OC	eQTLGen	ENSG00000005844	16	30509242	ITGAL	rs11574938	16	30485393	G	C	0.441352	0.251676	0.202966	0.214979	19	0.835993	1.28618	0.86~1.91
DPP4i	Endometrioid OC	eQTLGen	ENSG00000005844	16	30509242	ITGAL	rs11574938	16	30485393	G	C	0.441352	-0.248187	0.145628	0.0883345	19	0.184174	0.780214	0.59~1.04
DPP4i	HGSOC	eQTLGen	ENSG00000005844	16	30509242	ITGAL	rs11574938	16	30485393	G	C	0.441352	-0.0398349	0.0795294	0.616454	19	0.23229	0.960948	0.82~1.12
DPP4i	HGSOC (Survival)	eQTLGen	ENSG00000005844	16	30509242	ITGAL	rs11574938	16	30485393	G	C	0.441352	-0.123948	0.102302	0.225671	19	0.795882	0.883426	0.72~1.08
DPP4i	LGSOC	eQTLGen	ENSG00000005844	16	30509242	ITGAL	rs11574938	16	30485393	G	C	0.441352	-0.26408	0.240308	0.271802	19	0.978761	0.767912	0.48~1.23
DPP4i	Mucinous OC	eQTLGen	ENSG00000005844	16	30509242	ITGAL	rs11574938	16	30485393	G	C	0.441352	-0.19164	0.152036	0.207493	19	0.157317	0.825604	0.61~1.11
DPP4i	Glucose	eQTLGen	ENSG00000005844	16	30509242	ITGAL	rs11574938	16	30485393	G	C	0.441352	-0.0157237	0.0202144	0.43666	19	0.973639	0.984399	0.95~1.02
DPP4i	T2DM	eQTLGen	ENSG00000005844	16	30509242	ITGAL	rs11574938	16	30485393	G	C	0.441352	0.0392486	0.0378249	0.299438	8	0.00203235	1.04003	0.97~1.12
Sulfonylureas	All OC	eQTLGen	ENSG00000177807	1	160023647	KCNJ10	rs6673449	1	160043698	A	G	0.422465	-0.0592312	0.0915961	0.517854	19	0.313484	0.942489	0.79~1.13
Sulfonylureas	All OC (Histology Adjusted)	eQTLGen	ENSG00000177807	1	160023647	KCNJ10	rs6673449	1	160043698	A	G	0.422465	-0.13891	0.119521	0.245143	19	0.73974	0.870306	0.69~1.10
Sulfonylureas	All OC (Histology Unadjusted)	eQTLGen	ENSG00000177807	1	160023647	KCNJ10	rs6673449	1	160043698	A	G	0.422465	-0.109533	0.119362	0.358797	19	0.603685	0.896253	0.71~1.13
Sulfonylureas	Clear cell OC	eQTLGen	ENSG00000177807	1	160023647	KCNJ10	rs6673449	1	160043698	A	G	0.422465	0.0623256	0.279409	0.823487	19	0.393685	1.06431	0.62~1.84
Sulfonylureas	Endometrioid OC	eQTLGen	ENSG00000177807	1	160023647	KCNJ10	rs6673449	1	160043698	A	G	0.422465	0.237538	0.200673	0.236529	19	0.870884	1.26812	0.86~1.88
Sulfonylureas	HGSOC	eQTLGen	ENSG00000177807	1	160023647	KCNJ10	rs6673449	1	160043698	A	G	0.422465	-0.0476644	0.109087	0.662156	19	0.275916	0.953454	0.77~1.18
Sulfonylureas	HGSOC (Survival)	eQTLGen	ENSG00000177807	1	160023647	KCNJ10	rs6673449	1	160043698	A	G	0.422465	-0.121325	0.139408	0.384144	19	0.569635	0.885746	0.67~1.16
Sulfonylureas	LGSOC	eQTLGen	ENSG00000177807	1	160023647	KCNJ10	rs6673449	1	160043698	A	G	0.422465	0.175308	0.3331	0.598685	19	0.938133	1.19161	0.62~2.29
Sulfonylureas	Mucinous OC	eQTLGen	ENSG00000177807	1	160023647	KCNJ10	rs6673449	1	160043698	A	G	0.422465	-0.0313128	0.208441	0.880588	19	0.845989	0.969172	0.64~1.46
Sulfonylureas	Glucose	eQTLGen	ENSG00000177807	1	160023647	KCNJ10	rs6673449	1	160043698	A	G	0.422465	0.0120762	0.0284556	0.671283	20	0.965468	1.01215	0.96~1.07
Sulfonylureas	T2DM	eQTLGen	ENSG00000177807	1	160023647	KCNJ10	rs6673449	1	160043698	A	G	0.422465	0.00408961	0.053847	0.93946	14	0.194046	1.0041	0.90~1.12
Sulfonylureas	All OC	eQTLGen	ENSG00000187486	11	17409142	KCNJ11	rs2074311	11	17421860	A	G	0.40159	0.0961239	0.0897147	0.283972	12	0.0356426	1.1009	0.92~1.31
Sulfonylureas	All OC (Histology Adjusted)	eQTLGen	ENSG00000187486	11	17409142	KCNJ11	rs2074311	11	17421860	A	G	0.40159	0.0115389	0.118858	0.922662	12	0.769775	1.01161	0.80~1.28
Sulfonylureas	All OC (Histology Unadjusted)	eQTLGen	ENSG00000187486	11	17409142	KCNJ11	rs2074311	11	17421860	A	G	0.40159	0.00608207	0.118456	0.959051	12	0.722221	1.0061	0.80~1.27
Sulfonylureas	Clear cell OC	eQTLGen	ENSG00000187486	11	17409142	KCNJ11	rs2074311	11	17421860	A	G	0.40159	0.461221	0.273622	0.0918699	12	0.743024	1.58601	0.93~2.71
Sulfonylureas	Endometrioid OC	eQTLGen	ENSG00000187486	11	17409142	KCNJ11	rs2074311	11	17421860	A	G	0.40159	0.232777	0.194058	0.230326	12	0.184997	1.2621	0.86~1.85
Sulfonylureas	HGSOC	eQTLGen	ENSG00000187486	11	17409142	KCNJ11	rs2074311	11	17421860	A	G	0.40159	0.0985236	0.106542	0.355102	12	0.0318764	1.10354	0.90~1.36
Sulfonylureas	HGSOC (Survival)	eQTLGen	ENSG00000187486	11	17409142	KCNJ11	rs2074311	11	17421860	A	G	0.40159	0.0198047	0.139662	0.887234	12	0.737875	1.02	0.78~1.34
Sulfonylureas	LGSOC	eQTLGen	ENSG00000187486	11	17409142	KCNJ11	rs2074311	11	17421860	A	G	0.40159	0.247576	0.323097	0.443523	12	0.92393	1.28092	0.68~2.41
Sulfonylureas	Mucinous OC	eQTLGen	ENSG00000187486	11	17409142	KCNJ11	rs2074311	11	17421860	A	G	0.40159	-0.00817253	0.202314	0.967778	12	0.660601	0.991861	0.67~1.47
Sulfonylureas	Glucose	eQTLGen	ENSG00000187486	11	17409142	KCNJ11	rs2074311	11	17421860	A	G	0.40159	-0.0956953	0.0290389	0.000982771	12	0.630944	0.908741	0.86~0.96	**
Sulfonylureas	T2DM	eQTLGen	ENSG00000187486	11	17409142	KCNJ11	rs2074311	11	17421860	A	G	0.40159	-0.365964	0.0566378	1.03684e-10	11	0.382742	0.693528	0.62~0.77	**
AGI	All OC	eQTLGen	ENSG00000257335	7	141707080	MGAM	rs12535693	7	141797117	A	G	0.507952	0.152207	0.0878496	0.0831698	5	0.178145	1.1644	0.98~1.38
AGI	All OC (Histology Adjusted)	eQTLGen	ENSG00000257335	7	141707080	MGAM	rs12535693	7	141797117	A	G	0.507952	-0.0275302	0.116977	0.813939	5	0.290807	0.972845	0.77~1.22
AGI	All OC (Histology Unadjusted)	eQTLGen	ENSG00000257335	7	141707080	MGAM	rs12535693	7	141797117	A	G	0.507952	0.0183826	0.116215	0.874316	5	0.299233	1.01855	0.81~1.28
AGI	Clear cell OC	eQTLGen	ENSG00000257335	7	141707080	MGAM	rs12535693	7	141797117	A	G	0.507952	-0.0330141	0.263405	0.900258	5	0.989021	0.967525	0.58~1.62
AGI	Endometrioid OC	eQTLGen	ENSG00000257335	7	141707080	MGAM	rs12535693	7	141797117	A	G	0.507952	0.0564139	0.188803	0.765095	5	0.302449	1.05804	0.73~1.53
AGI	HGSOC	eQTLGen	ENSG00000257335	7	141707080	MGAM	rs12535693	7	141797117	A	G	0.507952	0.153023	0.104376	0.142625	5	0.168771	1.16535	0.95~1.43
AGI	HGSOC (Survival)	eQTLGen	ENSG00000257335	7	141707080	MGAM	rs12535693	7	141797117	A	G	0.507952	-0.0528669	0.13741	0.700432	5	0.156019	0.948506	0.72~1.24
AGI	LGSOC	eQTLGen	ENSG00000257335	7	141707080	MGAM	rs12535693	7	141797117	A	G	0.507952	0.0530652	0.313816	0.86572	5	0.858419	1.0545	0.57~1.95
AGI	Mucinous OC	eQTLGen	ENSG00000257335	7	141707080	MGAM	rs12535693	7	141797117	A	G	0.507952	-0.104019	0.197945	0.59924	5	0.832758	0.901208	0.61~1.33
AGI	Glucose	eQTLGen	ENSG00000257335	7	141707080	MGAM	rs4407790	7	141807087	G	T	0.395626	-0.00125433	0.0175939	0.943164	5	0.559569	0.998746	0.96~1.03
TZDs	All OC	eQTLGen	ENSG00000186951	22	46593038	PPARA	rs135549	22	46553308	C	T	0.390656	-0.155656	0.27121	0.566014	5	0.788849	0.855854	0.50~1.46
TZDs	All OC (Histology Adjusted)	eQTLGen	ENSG00000186951	22	46593038	PPARA	rs135549	22	46553308	C	T	0.390656	-0.0174069	0.352034	0.960563	5	0.83929	0.982744	0.49~1.96
TZDs	All OC (Histology Unadjusted)	eQTLGen	ENSG00000186951	22	46593038	PPARA	rs135549	22	46553308	C	T	0.390656	-0.00531303	0.35109	0.987926	5	0.488023	0.994701	0.50~1.98
TZDs	Clear cell OC	eQTLGen	ENSG00000186951	22	46593038	PPARA	rs135549	22	46553308	C	T	0.390656	0.320276	0.813263	0.693717	5	0.454356	1.37751	0.28~6.78
TZDs	Endometrioid OC	eQTLGen	ENSG00000186951	22	46593038	PPARA	rs135549	22	46553308	C	T	0.390656	0.498435	0.592458	0.40018	5	0.911942	1.64614	0.52~5.26
TZDs	HGSOC	eQTLGen	ENSG00000186951	22	46593038	PPARA	rs135549	22	46553308	C	T	0.390656	-0.463139	0.329818	0.160251	5	0.744199	0.629305	0.33~1.20
TZDs	HGSOC (Survival)	eQTLGen	ENSG00000186951	22	46593038	PPARA	rs135549	22	46553308	C	T	0.390656	-0.453615	0.418628	0.278553	5	0.755425	0.635327	0.28~1.44
TZDs	LGSOC	eQTLGen	ENSG00000186951	22	46593038	PPARA	rs135549	22	46553308	C	T	0.390656	-1.55338	1.00538	0.122331	5	0.398252	0.211532	0.03~1.52
TZDs	Mucinous OC	eQTLGen	ENSG00000186951	22	46593038	PPARA	rs135549	22	46553308	C	T	0.390656	0.688546	0.623487	0.269442	5	0.646001	1.99082	0.59~6.76
TZDs	Glucose	eQTLGen	ENSG00000186951	22	46593038	PPARA	rs135549	22	46553308	C	T	0.390656	0.0476675	0.0789975	0.546239	5	0.714268	1.04882	0.90~1.22
Sulfonylureas	All OC	eQTLGen	ENSG00000132170	3	12402361	PPARG	rs1699346	3	12504295	C	A	0.427435	0.00702471	0.0535559	0.895644	20	0.839538	1.00705	0.91~1.12
Sulfonylureas	All OC (Histology Adjusted)	eQTLGen	ENSG00000132170	3	12402361	PPARG	rs1699346	3	12504295	C	A	0.427435	-0.0811243	0.0707677	0.251652	20	0.353424	0.922079	0.80~1.06
Sulfonylureas	All OC (Histology Unadjusted)	eQTLGen	ENSG00000132170	3	12402361	PPARG	rs1699346	3	12504295	C	A	0.427435	-0.0728181	0.070482	0.301537	20	0.566685	0.92977	0.81~1.07
Sulfonylureas	Clear cell OC	eQTLGen	ENSG00000132170	3	12402361	PPARG	rs1699346	3	12504295	C	A	0.427435	-0.106715	0.161769	0.509461	20	0.832271	0.898782	0.65~1.23
Sulfonylureas	Endometrioid OC	eQTLGen	ENSG00000132170	3	12402361	PPARG	rs1699346	3	12504295	C	A	0.427435	0.000908545	0.11605	0.993753	20	0.604634	1.00091	0.80~1.26
Sulfonylureas	HGSOC	eQTLGen	ENSG00000132170	3	12402361	PPARG	rs1699346	3	12504295	C	A	0.427435	0.0309388	0.0636095	0.626694	20	0.586661	1.03142	0.91~1.17
Sulfonylureas	HGSOC (Survival)	eQTLGen	ENSG00000132170	3	12402361	PPARG	rs1699346	3	12504295	C	A	0.427435	-0.0859894	0.083304	0.301962	20	0.608944	0.917604	0.78~1.08
Sulfonylureas	LGSOC	eQTLGen	ENSG00000132170	3	12402361	PPARG	rs1699346	3	12504295	C	A	0.427435	-0.104659	0.193247	0.588108	20	0.726704	0.900632	0.62~1.32
Sulfonylureas	Mucinous OC	eQTLGen	ENSG00000132170	3	12402361	PPARG	rs1699346	3	12504295	C	A	0.427435	0.00904985	0.121311	0.940533	20	0.63898	1.00909	0.80~1.28
Sulfonylureas	Glucose	eQTLGen	ENSG00000132170	3	12402361	PPARG	rs1699346	3	12504295	C	A	0.427435	-0.00819601	0.0167746	0.625127	20	0.105984	0.991837	0.96~1.02
Sulfonylureas	T2DM	eQTLGen	ENSG00000132170	3	12402361	PPARG	rs1699346	3	12504295	C	A	0.427435	-0.0533973	0.0320823	0.0960357	20	0.0260304	0.948003	0.89~1.01
Biguanides	All OC	eQTLGen	ENSG00000132356	5	40778978	PRKAA1	rs863241	5	40805847	T	G	0.476143	-0.229737	0.300209	0.444119	NA	NA	0.794743	0.44~1.43
Biguanides	All OC (Histology Adjusted)	eQTLGen	ENSG00000132356	5	40778978	PRKAA1	rs863241	5	40805847	T	G	0.476143	0.154631	0.393311	0.694208	NA	NA	1.16723	0.54~2.52
Biguanides	All OC (Histology Unadjusted)	eQTLGen	ENSG00000132356	5	40778978	PRKAA1	rs863241	5	40805847	T	G	0.476143	0.306611	0.395765	0.4385	NA	NA	1.35881	0.63~2.95
Biguanides	Clear cell OC	eQTLGen	ENSG00000132356	5	40778978	PRKAA1	rs863241	5	40805847	T	G	0.476143	0.869467	0.913091	0.340984	NA	NA	2.38564	0.40~14.28
Biguanides	Endometrioid OC	eQTLGen	ENSG00000132356	5	40778978	PRKAA1	rs863241	5	40805847	T	G	0.476143	-0.968872	0.667455	0.146615	NA	NA	0.379511	0.10~1.40
Biguanides	HGSOC	eQTLGen	ENSG00000132356	5	40778978	PRKAA1	rs863241	5	40805847	T	G	0.476143	-0.208995	0.355009	0.556061	NA	NA	0.811399	0.40~1.63
Biguanides	HGSOC (Survival)	eQTLGen	ENSG00000132356	5	40778978	PRKAA1	rs863241	5	40805847	T	G	0.476143	0.435838	0.464415	0.348005	NA	NA	1.54626	0.62~3.84
Biguanides	LGSOC	eQTLGen	ENSG00000132356	5	40778978	PRKAA1	rs863241	5	40805847	T	G	0.476143	0.369568	1.0794	0.732062	NA	NA	1.44711	0.17~12.00
Biguanides	Mucinous OC	eQTLGen	ENSG00000132356	5	40778978	PRKAA1	rs863241	5	40805847	T	G	0.476143	-0.281649	0.673019	0.675592	NA	NA	0.754538	0.20~2.82
Biguanides	Glucose	eQTLGen	ENSG00000132356	5	40778978	PRKAA1	rs863241	5	40805847	T	G	0.476143	-0.0393906	0.0932312	0.672656	NA	NA	0.961375	0.80~1.15
Other drugs	All OC	eQTLGen	ENSG00000132329	2	238794146	RAMP1	rs895572	2	238815252	C	T	0.44831	-0.0617785	0.0635003	0.33061	4	0.939732	0.940091	0.83~1.06
Other drugs	All OC (Histology Adjusted)	eQTLGen	ENSG00000132329	2	238794146	RAMP1	rs895572	2	238815252	C	T	0.44831	0.0101685	0.0838431	0.903469	4	0.234785	1.01022	0.86~1.19
Other drugs	All OC (Histology Unadjusted)	eQTLGen	ENSG00000132329	2	238794146	RAMP1	rs895572	2	238815252	C	T	0.44831	0.0248985	0.0834639	0.765463	4	0.15714	1.02521	0.87~1.21
Other drugs	Clear cell OC	eQTLGen	ENSG00000132329	2	238794146	RAMP1	rs895572	2	238815252	C	T	0.44831	0.256611	0.193445	0.184664	4	0.908143	1.29254	0.88~1.89
Other drugs	Endometrioid OC	eQTLGen	ENSG00000132329	2	238794146	RAMP1	rs895572	2	238815252	C	T	0.44831	0.0272248	0.137998	0.843606	4	0.248528	1.0276	0.78~1.35
Other drugs	HGSOC	eQTLGen	ENSG00000132329	2	238794146	RAMP1	rs895572	2	238815252	C	T	0.44831	-0.0655198	0.0754891	0.385429	4	0.627705	0.936581	0.81~1.09
Other drugs	HGSOC (Survival)	eQTLGen	ENSG00000132329	2	238794146	RAMP1	rs895572	2	238815252	C	T	0.44831	-0.101397	0.0979231	0.300445	4	0.863522	0.903574	0.75~1.09
Other drugs	LGSOC	eQTLGen	ENSG00000132329	2	238794146	RAMP1	rs895572	2	238815252	C	T	0.44831	-0.186391	0.232975	0.423685	4	0.634267	0.829949	0.53~1.31
Other drugs	Mucinous OC	eQTLGen	ENSG00000132329	2	238794146	RAMP1	rs895572	2	238815252	C	T	0.44831	-0.203082	0.144243	0.159154	4	0.733359	0.816211	0.62~1.08
Other drugs	Glucose	eQTLGen	ENSG00000132329	2	238794146	RAMP1	rs895572	2	238815252	C	T	0.44831	0.0307706	0.0200799	0.125422	4	0.831089	1.03125	0.99~1.07
Other drugs	All OC	eQTLGen	ENSG00000122679	7	45211645	RAMP3	rs1294860	7	45257769	C	T	0.450298	0.0376595	0.100804	0.708709	6	0.389492	1.03838	0.85~1.27
Other drugs	All OC (Histology Adjusted)	eQTLGen	ENSG00000122679	7	45211645	RAMP3	rs1294860	7	45257769	C	T	0.450298	0.128617	0.133276	0.334527	6	0.556726	1.13725	0.88~1.48
Other drugs	All OC (Histology Unadjusted)	eQTLGen	ENSG00000122679	7	45211645	RAMP3	rs1294860	7	45257769	C	T	0.450298	0.115136	0.132433	0.384636	6	0.466594	1.12203	0.87~1.45
Other drugs	Clear cell OC	eQTLGen	ENSG00000122679	7	45211645	RAMP3	rs1294860	7	45257769	C	T	0.450298	0.144794	0.30348	0.633282	6	0.937328	1.1558	0.64~2.10
Other drugs	Endometrioid OC	eQTLGen	ENSG00000122679	7	45211645	RAMP3	rs1294860	7	45257769	C	T	0.450298	-0.155943	0.217275	0.472929	6	0.835804	0.855608	0.56~1.31
Other drugs	HGSOC	eQTLGen	ENSG00000122679	7	45211645	RAMP3	rs1294860	7	45257769	C	T	0.450298	-0.0224879	0.119734	0.851021	6	0.443064	0.977763	0.77~1.24
Other drugs	HGSOC (Survival)	eQTLGen	ENSG00000122679	7	45211645	RAMP3	rs1294860	7	45257769	C	T	0.450298	0.170736	0.156193	0.274347	6	0.560099	1.18618	0.87~1.61
Other drugs	LGSOC	eQTLGen	ENSG00000122679	7	45211645	RAMP3	rs1294860	7	45257769	C	T	0.450298	0.572909	0.367793	0.119306	6	0.538573	1.77342	0.86~3.65
Other drugs	Mucinous OC	eQTLGen	ENSG00000122679	7	45211645	RAMP3	rs1294860	7	45257769	C	T	0.450298	0.178824	0.228036	0.432926	6	0.208653	1.19581	0.76~1.87
Other drugs	Glucose	eQTLGen	ENSG00000122679	7	45211645	RAMP3	rs1294860	7	45257769	C	T	0.450298	0.00124982	0.0306271	0.967449	6	0.81164	1.00125	0.94~1.06
Other drugs	T2DM	eQTLGen	ENSG00000122679	7	45211645	RAMP3	rs1294860	7	45257769	C	T	0.450298	0.108577	0.0586449	0.0641072	6	0.121201	1.11469	0.99~1.25
TZDs	All OC	eQTLGen	ENSG00000106366	7	100776458	SERPINE1	rs2227631	7	100769538	G	A	0.405567	-0.483428	0.302745	0.110307	10	0.411113	0.616666	0.34~1.12
TZDs	All OC (Histology Adjusted)	eQTLGen	ENSG00000106366	7	100776458	SERPINE1	rs2227631	7	100769538	G	A	0.405567	0.220965	0.385424	0.56644	10	0.380002	1.24728	0.59~2.65
TZDs	All OC (Histology Unadjusted)	eQTLGen	ENSG00000106366	7	100776458	SERPINE1	rs2227631	7	100769538	G	A	0.405567	0.154002	0.382477	0.687211	10	0.281929	1.16649	0.55~2.47
TZDs	Clear cell OC	eQTLGen	ENSG00000106366	7	100776458	SERPINE1	rs2227631	7	100769538	G	A	0.405567	1.39705	0.910495	0.124935	10	0.309119	4.04325	0.68~24.09
TZDs	Endometrioid OC	eQTLGen	ENSG00000106366	7	100776458	SERPINE1	rs2227631	7	100769538	G	A	0.405567	-0.773919	0.646574	0.231325	10	0.618035	0.461202	0.13~1.64
TZDs	HGSOC	eQTLGen	ENSG00000106366	7	100776458	SERPINE1	rs2227631	7	100769538	G	A	0.405567	-0.578593	0.360175	0.108181	10	0.591802	0.560687	0.28~1.14
TZDs	HGSOC (Survival)	eQTLGen	ENSG00000106366	7	100776458	SERPINE1	rs2227631	7	100769538	G	A	0.405567	0.135468	0.450591	0.763684	10	0.559542	1.14507	0.47~2.77
TZDs	LGSOC	eQTLGen	ENSG00000106366	7	100776458	SERPINE1	rs2227631	7	100769538	G	A	0.405567	-1.36598	1.08006	0.20597	10	0.220774	0.255131	0.03~2.12
TZDs	Mucinous OC	eQTLGen	ENSG00000106366	7	100776458	SERPINE1	rs2227631	7	100769538	G	A	0.405567	-0.276586	0.661621	0.675916	10	0.873981	0.758368	0.21~2.77
TZDs	Glucose	eQTLGen	ENSG00000106366	7	100776458	SERPINE1	rs2227631	7	100769538	G	A	0.405567	-0.0348016	0.0919295	0.705008	10	0.193608	0.965797	0.81~1.16
TZDs	T2DM	eQTLGen	ENSG00000106366	7	100776458	SERPINE1	rs2227631	7	100769538	G	A	0.405567	0.0934265	0.172419	0.587918	8	0.482607	1.09793	0.78~1.54
Other drugs	All OC	eQTLGen	ENSG00000147955	9	34636262	SIGMAR1	rs13440002	9	34583636	T	G	0.437376	0.048104	0.0868351	0.5796	15	0.60637	1.04928	0.89~1.24
Other drugs	All OC (Histology Adjusted)	eQTLGen	ENSG00000147955	9	34636262	SIGMAR1	rs13440002	9	34583636	T	G	0.437376	0.0697518	0.11412	0.541056	15	0.247968	1.07224	0.86~1.34
Other drugs	All OC (Histology Unadjusted)	eQTLGen	ENSG00000147955	9	34636262	SIGMAR1	rs13440002	9	34583636	T	G	0.437376	0.105409	0.113803	0.354323	15	0.0898029	1.11116	0.89~1.39
Other drugs	Clear cell OC	eQTLGen	ENSG00000147955	9	34636262	SIGMAR1	rs13440002	9	34583636	T	G	0.437376	0.239577	0.264008	0.364164	15	0.5133	1.27071	0.76~2.13
Other drugs	Endometrioid OC	eQTLGen	ENSG00000147955	9	34636262	SIGMAR1	rs13440002	9	34583636	T	G	0.437376	-0.0980559	0.188112	0.602183	15	0.862078	0.906598	0.63~1.31
Other drugs	HGSOC	eQTLGen	ENSG00000147955	9	34636262	SIGMAR1	rs13440002	9	34583636	T	G	0.437376	0.0875802	0.103296	0.396517	15	0.403985	1.09153	0.89~1.34
Other drugs	HGSOC (Survival)	eQTLGen	ENSG00000147955	9	34636262	SIGMAR1	rs13440002	9	34583636	T	G	0.437376	0.0505115	0.133673	0.705525	15	0.489649	1.05181	0.81~1.37
Other drugs	LGSOC	eQTLGen	ENSG00000147955	9	34636262	SIGMAR1	rs13440002	9	34583636	T	G	0.437376	0.0102871	0.315055	0.973952	15	0.854613	1.01034	0.54~1.87
Other drugs	Mucinous OC	eQTLGen	ENSG00000147955	9	34636262	SIGMAR1	rs13440002	9	34583636	T	G	0.437376	0.147116	0.19678	0.45469	15	0.699174	1.15849	0.79~1.70
Other drugs	Glucose	eQTLGen	ENSG00000147955	9	34636262	SIGMAR1	rs13440002	9	34583636	T	G	0.437376	0.0355732	0.0270739	0.188869	16	0.765921	1.03621	0.98~1.09
Other drugs	T2DM	eQTLGen	ENSG00000147955	9	34636262	SIGMAR1	rs13440002	9	34583636	T	G	0.437376	0.0774297	0.0515591	0.133157	16	0.0224707	1.08051	0.98~1.20
TZDs	All OC	eQTLGen	ENSG00000112759	6	44194565	SLC29A1	rs575034	6	44224924	C	A	0.537773	-0.0326372	0.167245	0.845279	5	0.772787	0.96789	0.70~1.34
TZDs	All OC (Histology Adjusted)	eQTLGen	ENSG00000112759	6	44194565	SLC29A1	rs575034	6	44224924	C	A	0.537773	0.151928	0.219381	0.488606	5	0.621716	1.16408	0.76~1.79
TZDs	All OC (Histology Unadjusted)	eQTLGen	ENSG00000112759	6	44194565	SLC29A1	rs575034	6	44224924	C	A	0.537773	0.32258	0.22041	0.143319	5	0.474599	1.38069	0.90~2.13
TZDs	Clear cell OC	eQTLGen	ENSG00000112759	6	44194565	SLC29A1	rs575034	6	44224924	C	A	0.537773	0.520963	0.508552	0.305645	5	0.370207	1.68365	0.62~4.56
TZDs	Endometrioid OC	eQTLGen	ENSG00000112759	6	44194565	SLC29A1	rs575034	6	44224924	C	A	0.537773	-0.931476	0.373627	0.0126646	5	0.607101	0.393972	0.19~0.82	*
TZDs	HGSOC	eQTLGen	ENSG00000112759	6	44194565	SLC29A1	rs575034	6	44224924	C	A	0.537773	0.143395	0.199344	0.471934	5	0.417336	1.15419	0.78~1.71
TZDs	HGSOC (Survival)	eQTLGen	ENSG00000112759	6	44194565	SLC29A1	rs575034	6	44224924	C	A	0.537773	0.0458983	0.257439	0.858497	5	0.354999	1.04697	0.63~1.73
TZDs	LGSOC	eQTLGen	ENSG00000112759	6	44194565	SLC29A1	rs575034	6	44224924	C	A	0.537773	1.06018	0.613445	0.0839465	5	0.44568	2.88689	0.87~9.61
TZDs	Mucinous OC	eQTLGen	ENSG00000112759	6	44194565	SLC29A1	rs575034	6	44224924	C	A	0.537773	0.0881584	0.37802	0.815598	5	0.937213	1.09216	0.52~2.29
TZDs	Glucose	eQTLGen	ENSG00000112759	6	44194565	SLC29A1	rs575034	6	44224924	C	A	0.537773	-0.0256527	0.0501861	0.609246	5	0.107008	0.974674	0.88~1.08
Biguanides	All OC	eQTLGen	ENSG00000142494	17	19440522	SLC47A1	rs11650088	17	19637551	A	G	0.40159	0.102234	0.072487	0.158427	10	0.150816	1.10764	0.96~1.28
Biguanides	All OC (Histology Adjusted)	eQTLGen	ENSG00000142494	17	19440522	SLC47A1	rs11650088	17	19637551	A	G	0.40159	-0.0399368	0.0947003	0.673231	10	0.585194	0.96085	0.80~1.16
Biguanides	All OC (Histology Unadjusted)	eQTLGen	ENSG00000142494	17	19440522	SLC47A1	rs11650088	17	19637551	A	G	0.40159	-0.0747485	0.0942603	0.427777	10	0.578979	0.927977	0.77~1.12
Biguanides	Clear cell OC	eQTLGen	ENSG00000142494	17	19440522	SLC47A1	rs11650088	17	19637551	A	G	0.40159	0.350404	0.218429	0.108671	10	0.917906	1.41964	0.93~2.18
Biguanides	Endometrioid OC	eQTLGen	ENSG00000142494	17	19440522	SLC47A1	rs11650088	17	19637551	A	G	0.40159	0.320153	0.157108	0.0415702	10	0.121575	1.37734	1.01~1.87	*
Biguanides	HGSOC	eQTLGen	ENSG00000142494	17	19440522	SLC47A1	rs11650088	17	19637551	A	G	0.40159	0.0427491	0.0862512	0.620152	10	0.522435	1.04368	0.88~1.24
Biguanides	HGSOC (Survival)	eQTLGen	ENSG00000142494	17	19440522	SLC47A1	rs11650088	17	19637551	A	G	0.40159	-0.1025	0.11173	0.358936	10	0.901409	0.902578	0.73~1.12
Biguanides	LGSOC	eQTLGen	ENSG00000142494	17	19440522	SLC47A1	rs11650088	17	19637551	A	G	0.40159	-0.140566	0.261423	0.590788	10	0.924195	0.868866	0.52~1.45
Biguanides	Mucinous OC	eQTLGen	ENSG00000142494	17	19440522	SLC47A1	rs11650088	17	19637551	A	G	0.40159	-0.0676246	0.164887	0.681712	10	0.634314	0.934611	0.68~1.29
Biguanides	Glucose	eQTLGen	ENSG00000142494	17	19440522	SLC47A1	rs2016823	17	19634707	A	G	0.393638	0.0244718	0.0218849	0.263481	9	0.962978	1.02477	0.98~1.07
Biguanides	T2DM	eQTLGen	ENSG00000142494	17	19440522	SLC47A1	rs2016823	17	19634707	A	G	0.393638	0.0264794	0.0415511	0.523947	7	0.854342	1.02683	0.95~1.11
Sulfonylureas	All OC	eQTLGen	ENSG00000130529	19	49688045	TRPM4	rs3745300	19	49658875	G	T	0.457256	-0.00878027	0.0626733	0.888584	20	0.945604	0.991258	0.88~1.12
Sulfonylureas	All OC (Histology Adjusted)	eQTLGen	ENSG00000130529	19	49688045	TRPM4	rs3745300	19	49658875	G	T	0.457256	0.105809	0.0823333	0.198746	20	0.376726	1.11161	0.95~1.31
Sulfonylureas	All OC (Histology Unadjusted)	eQTLGen	ENSG00000130529	19	49688045	TRPM4	rs3745300	19	49658875	G	T	0.457256	0.0875405	0.0818273	0.2847	20	0.399686	1.09149	0.93~1.28
Sulfonylureas	Clear cell OC	eQTLGen	ENSG00000130529	19	49688045	TRPM4	rs3745300	19	49658875	G	T	0.457256	-0.0357373	0.18859	0.849703	20	0.835475	0.964894	0.67~1.40
Sulfonylureas	Endometrioid OC	eQTLGen	ENSG00000130529	19	49688045	TRPM4	rs3745300	19	49658875	G	T	0.457256	0.13968	0.135527	0.302706	20	0.482995	1.14991	0.88~1.50
Sulfonylureas	HGSOC	eQTLGen	ENSG00000130529	19	49688045	TRPM4	rs3745300	19	49658875	G	T	0.457256	-0.0846997	0.0747485	0.25716	20	0.409984	0.918788	0.79~1.06
Sulfonylureas	HGSOC (Survival)	eQTLGen	ENSG00000130529	19	49688045	TRPM4	rs3745300	19	49658875	G	T	0.457256	0.0252569	0.0968972	0.794357	20	0.294519	1.02558	0.85~1.24
Sulfonylureas	LGSOC	eQTLGen	ENSG00000130529	19	49688045	TRPM4	rs3745300	19	49658875	G	T	0.457256	0.147066	0.223826	0.511144	20	0.761746	1.15843	0.75~1.80
Sulfonylureas	Mucinous OC	eQTLGen	ENSG00000130529	19	49688045	TRPM4	rs3745300	19	49658875	G	T	0.457256	0.0871034	0.14181	0.539065	20	0.612387	1.09101	0.83~1.44
Sulfonylureas	Glucose	eQTLGen	ENSG00000130529	19	49688045	TRPM4	rs3745300	19	49658875	G	T	0.457256	0.0556125	0.018278	0.00234547	20	0.186307	1.05719	1.02~1.10	*
Sulfonylureas	T2DM	eQTLGen	ENSG00000130529	19	49688045	TRPM4	rs2278004	19	49654421	T	C	0.472167	-0.045397	0.0437619	0.299566	5	0.00355083	0.955618	0.88~1.04
Sulfonylureas	All OC	eQTLGen	ENSG00000112715	6	43746072	VEGFA	rs11965885	6	43693094	G	T	0.414513	-0.0810317	0.0579508	0.162028	4	0.844346	0.922164	0.82~1.03
Sulfonylureas	All OC (Histology Adjusted)	eQTLGen	ENSG00000112715	6	43746072	VEGFA	rs11965885	6	43693094	G	T	0.414513	0.0195322	0.0761684	0.797615	4	0.773753	1.01972	0.88~1.18
Sulfonylureas	All OC (Histology Unadjusted)	eQTLGen	ENSG00000112715	6	43746072	VEGFA	rs11965885	6	43693094	G	T	0.414513	0.0352096	0.0757941	0.642258	4	0.727983	1.03584	0.89~1.20
Sulfonylureas	Clear cell OC	eQTLGen	ENSG00000112715	6	43746072	VEGFA	rs11965885	6	43693094	G	T	0.414513	-0.30919	0.175409	0.0779541	4	0.380057	0.734041	0.52~1.04
Sulfonylureas	Endometrioid OC	eQTLGen	ENSG00000112715	6	43746072	VEGFA	rs11965885	6	43693094	G	T	0.414513	-0.183771	0.125447	0.14294	4	0.798475	0.832126	0.65~1.06
Sulfonylureas	HGSOC	eQTLGen	ENSG00000112715	6	43746072	VEGFA	rs11965885	6	43693094	G	T	0.414513	-0.0601708	0.0689176	0.382618	4	0.46529	0.941604	0.82~1.08
Sulfonylureas	HGSOC (Survival)	eQTLGen	ENSG00000112715	6	43746072	VEGFA	rs11965885	6	43693094	G	T	0.414513	-0.0308301	0.0893314	0.730004	4	0.39391	0.96964	0.81~1.16
Sulfonylureas	LGSOC	eQTLGen	ENSG00000112715	6	43746072	VEGFA	rs11965885	6	43693094	G	T	0.414513	-0.190837	0.209639	0.362659	4	0.43235	0.826267	0.55~1.25
Sulfonylureas	Mucinous OC	eQTLGen	ENSG00000112715	6	43746072	VEGFA	rs11965885	6	43693094	G	T	0.414513	0.101766	0.131473	0.438906	4	0.107731	1.10712	0.86~1.43
Sulfonylureas	Glucose	eQTLGen	ENSG00000112715	6	43746072	VEGFA	rs11965885	6	43693094	G	T	0.414513	0.00375435	0.0179693	0.834502	4	0.0223178	1.00376	0.97~1.04
Sulfonylureas	T2DM	eQTLGen	ENSG00000112715	6	43746072	VEGFA	rs2782256	6	43688343	A	G	0.389662	-0.0327893	0.0518363	0.527024	NA	NA	0.967742	0.87~1.07
Sulfonylureas	All OC	PsychENCODE(HCP100)	ENSG00000006071	11	17414432	ABCC8	rs10734253	11	17406607	G	C	0.428429	-0.0455494	0.0320887	0.155758	3	0.347647	0.955472	0.90~1.02
Sulfonylureas	HGSOC	PsychENCODE(HCP100)	ENSG00000006071	11	17414432	ABCC8	rs10734253	11	17406607	G	C	0.428429	-0.0390219	0.0380162	0.304677	3	0.194234	0.96173	0.89~1.04
Sulfonylureas	LGSOC	PsychENCODE(HCP100)	ENSG00000006071	11	17414432	ABCC8	rs10734253	11	17406607	G	C	0.428429	-0.0749469	0.1145	0.512752	3	0.990199	0.927793	0.74~1.16
Sulfonylureas	Clear cell OC	PsychENCODE(HCP100)	ENSG00000006071	11	17414432	ABCC8	rs10734253	11	17406607	G	C	0.428429	-0.108156	0.096377	0.26177	3	0.337799	0.897488	0.74~1.08
Sulfonylureas	Mucinous OC	PsychENCODE(HCP100)	ENSG00000006071	11	17414432	ABCC8	rs10734253	11	17406607	G	C	0.428429	-0.0215335	0.071733	0.764032	3	0.631677	0.978697	0.85~1.13
Sulfonylureas	Endometrioid OC	PsychENCODE(HCP100)	ENSG00000006071	11	17414432	ABCC8	rs10734253	11	17406607	G	C	0.428429	-0.0758521	0.0690178	0.271758	3	0.190407	0.926953	0.81~1.06
Sulfonylureas	HGSOC (Survival)	PsychENCODE(HCP100)	ENSG00000006071	11	17414432	ABCC8	rs10734253	11	17406607	G	C	0.428429	-0.0179672	0.0496731	0.717569	3	0.993617	0.982193	0.89~1.08
Sulfonylureas	All OC (Histology Unadjusted)	PsychENCODE(HCP100)	ENSG00000006071	11	17414432	ABCC8	rs10734253	11	17406607	G	C	0.428429	0.0232583	0.042123	0.580844	3	0.89624	1.02353	0.94~1.11
Sulfonylureas	All OC (Histology Adjusted)	PsychENCODE(HCP100)	ENSG00000006071	11	17414432	ABCC8	rs10734253	11	17406607	G	C	0.428429	0.0115875	0.0422746	0.784008	3	0.76815	1.01165	0.93~1.10
Other drugs	All OC	PsychENCODE(HCP100)	ENSG00000085662	7	134127102	AKR1B1	rs13224282	7	134190499	G	T	0.408549	-0.0280787	0.056028	0.616262	10	0.268488	0.972312	0.87~1.09
Other drugs	HGSOC	PsychENCODE(HCP100)	ENSG00000085662	7	134127102	AKR1B1	rs13224282	7	134190499	G	T	0.408549	-0.0507052	0.0669109	0.44857	10	0.627253	0.950559	0.83~1.08
Other drugs	LGSOC	PsychENCODE(HCP100)	ENSG00000085662	7	134127102	AKR1B1	rs13224282	7	134190499	G	T	0.408549	-0.0832632	0.20275	0.681315	10	0.429586	0.920109	0.62~1.37
Other drugs	Clear cell OC	PsychENCODE(HCP100)	ENSG00000085662	7	134127102	AKR1B1	rs13224282	7	134190499	G	T	0.408549	-0.00482828	0.168663	0.977162	10	0.385333	0.995183	0.72~1.39
Other drugs	Mucinous OC	PsychENCODE(HCP100)	ENSG00000085662	7	134127102	AKR1B1	rs13224282	7	134190499	G	T	0.408549	0.408638	0.142779	0.00420935	10	0.399373	1.50477	1.14~1.99	*
Other drugs	Endometrioid OC	PsychENCODE(HCP100)	ENSG00000085662	7	134127102	AKR1B1	rs13224282	7	134190499	G	T	0.408549	-0.0572332	0.12136	0.637214	10	0.0513873	0.944374	0.74~1.20
Other drugs	HGSOC (Survival)	PsychENCODE(HCP100)	ENSG00000085662	7	134127102	AKR1B1	rs13224282	7	134190499	G	T	0.408549	-0.0622421	0.0875591	0.477172	10	0.771442	0.939655	0.79~1.12
Other drugs	All OC (Histology Unadjusted)	PsychENCODE(HCP100)	ENSG00000085662	7	134127102	AKR1B1	rs13224282	7	134190499	G	T	0.408549	0.00749697	0.0739536	0.919254	10	0.33697	1.00753	0.87~1.16
Other drugs	All OC (Histology Adjusted)	PsychENCODE(HCP100)	ENSG00000085662	7	134127102	AKR1B1	rs13224282	7	134190499	G	T	0.408549	0.0177776	0.0741242	0.810458	10	0.539595	1.01794	0.88~1.18
Sulfonylureas	All OC	PsychENCODE(HCP100)	ENSG00000001626	7	117105838	CFTR	rs34256873	7	117101285	C	A	0.441352	-0.0729833	0.0360332	0.0428213	4	0.333597	0.929616	0.87~1.00	*
Sulfonylureas	HGSOC	PsychENCODE(HCP100)	ENSG00000001626	7	117105838	CFTR	rs34256873	7	117101285	C	A	0.441352	-0.0388265	0.0420882	0.356266	4	0.072768	0.961918	0.89~1.04
Sulfonylureas	LGSOC	PsychENCODE(HCP100)	ENSG00000001626	7	117105838	CFTR	rs34256873	7	117101285	C	A	0.441352	0.0596039	0.127202	0.639371	4	0.585249	1.06142	0.83~1.36
Sulfonylureas	Clear cell OC	PsychENCODE(HCP100)	ENSG00000001626	7	117105838	CFTR	rs34256873	7	117101285	C	A	0.441352	-0.12414	0.107283	0.24722	4	0.0505212	0.883256	0.72~1.09
Sulfonylureas	Mucinous OC	PsychENCODE(HCP100)	ENSG00000001626	7	117105838	CFTR	rs34256873	7	117101285	C	A	0.441352	-0.0381444	0.0797446	0.632414	4	0.856913	0.962574	0.82~1.13
Sulfonylureas	Endometrioid OC	PsychENCODE(HCP100)	ENSG00000001626	7	117105838	CFTR	rs34256873	7	117101285	C	A	0.441352	-0.0601548	0.0763594	0.430822	4	0.335438	0.941619	0.81~1.09
Sulfonylureas	HGSOC (Survival)	PsychENCODE(HCP100)	ENSG00000001626	7	117105838	CFTR	rs34256873	7	117101285	C	A	0.441352	0.0809585	0.0561403	0.149281	4	0.460479	1.08433	0.97~1.21
Sulfonylureas	All OC (Histology Unadjusted)	PsychENCODE(HCP100)	ENSG00000001626	7	117105838	CFTR	rs34256873	7	117101285	C	A	0.441352	0.0304053	0.0468812	0.516622	4	0.935612	1.03087	0.94~1.13
Sulfonylureas	All OC (Histology Adjusted)	PsychENCODE(HCP100)	ENSG00000001626	7	117105838	CFTR	rs34256873	7	117101285	C	A	0.441352	0.0290936	0.0471341	0.537068	4	0.718984	1.02952	0.94~1.13
Insulin	All OC	PsychENCODE(HCP100)	ENSG00000109472	4	166282346	CPE	rs6835701	4	166352900	C	T	0.483101	0.0399413	0.0424866	0.347171	11	0.873718	1.04075	0.96~1.13
Insulin	HGSOC	PsychENCODE(HCP100)	ENSG00000109472	4	166282346	CPE	rs6835701	4	166352900	C	T	0.483101	0.0564938	0.050675	0.264926	11	0.67974	1.05812	0.96~1.17
Insulin	LGSOC	PsychENCODE(HCP100)	ENSG00000109472	4	166282346	CPE	rs6835701	4	166352900	C	T	0.483101	-0.046366	0.152807	0.761563	11	0.810144	0.954692	0.71~1.29
Insulin	Clear cell OC	PsychENCODE(HCP100)	ENSG00000109472	4	166282346	CPE	rs6835701	4	166352900	C	T	0.483101	0.0283577	0.127496	0.823987	11	0.797069	1.02876	0.80~1.32
Insulin	Mucinous OC	PsychENCODE(HCP100)	ENSG00000109472	4	166282346	CPE	rs6835701	4	166352900	C	T	0.483101	-0.110899	0.0967692	0.25179	11	0.988239	0.895029	0.74~1.08
Insulin	Endometrioid OC	PsychENCODE(HCP100)	ENSG00000109472	4	166282346	CPE	rs6835701	4	166352900	C	T	0.483101	0.160208	0.0933385	0.0860849	11	0.467374	1.17375	0.98~1.41
Insulin	HGSOC (Survival)	PsychENCODE(HCP100)	ENSG00000109472	4	166282346	CPE	rs6835701	4	166352900	C	T	0.483101	0.00684255	0.0652657	0.916502	11	0.159532	1.00687	0.89~1.14
Insulin	All OC (Histology Unadjusted)	PsychENCODE(HCP100)	ENSG00000109472	4	166282346	CPE	rs6835701	4	166352900	C	T	0.483101	-0.00953906	0.0553977	0.863286	11	0.206664	0.990506	0.89~1.10
Insulin	All OC (Histology Adjusted)	PsychENCODE(HCP100)	ENSG00000109472	4	166282346	CPE	rs6835701	4	166352900	C	T	0.483101	0.0199801	0.0555952	0.719306	11	0.139439	1.02018	0.91~1.14
Sulfonylureas	All OC	PsychENCODE(HCP100)	ENSG00000110090	11	68522088	CPT1A	rs4633480	11	68613367	A	G	0.542744	-0.0889452	0.0538586	0.0986451	7	0.256509	0.914896	0.82~1.02
Sulfonylureas	HGSOC	PsychENCODE(HCP100)	ENSG00000110090	11	68522088	CPT1A	rs4633480	11	68613367	A	G	0.542744	-0.103763	0.0640679	0.105323	7	0.39306	0.901439	0.80~1.02
Sulfonylureas	LGSOC	PsychENCODE(HCP100)	ENSG00000110090	11	68522088	CPT1A	rs4633480	11	68613367	A	G	0.542744	-0.0867892	0.18828	0.64483	7	0.415993	0.91687	0.63~1.33
Sulfonylureas	Clear cell OC	PsychENCODE(HCP100)	ENSG00000110090	11	68522088	CPT1A	rs4633480	11	68613367	A	G	0.542744	-0.162132	0.159347	0.308926	7	0.568911	0.850329	0.62~1.16
Sulfonylureas	Mucinous OC	PsychENCODE(HCP100)	ENSG00000110090	11	68522088	CPT1A	rs4633480	11	68613367	A	G	0.542744	0.0619755	0.118415	0.600713	7	0.59284	1.06394	0.84~1.34
Sulfonylureas	Endometrioid OC	PsychENCODE(HCP100)	ENSG00000110090	11	68522088	CPT1A	rs4633480	11	68613367	A	G	0.542744	-0.122344	0.114295	0.28443	7	0.619288	0.884844	0.71~1.11
Sulfonylureas	HGSOC (Survival)	PsychENCODE(HCP100)	ENSG00000110090	11	68522088	CPT1A	rs4633480	11	68613367	A	G	0.542744	0.053665	0.0818349	0.511971	7	0.827028	1.05513	0.90~1.24
Sulfonylureas	All OC (Histology Unadjusted)	PsychENCODE(HCP100)	ENSG00000110090	11	68522088	CPT1A	rs4633480	11	68613367	A	G	0.542744	0.0566442	0.0691498	0.412699	7	0.938355	1.05828	0.92~1.21
Sulfonylureas	All OC (Histology Adjusted)	PsychENCODE(HCP100)	ENSG00000110090	11	68522088	CPT1A	rs4633480	11	68613367	A	G	0.542744	0.0553506	0.069592	0.426404	7	0.925103	1.05691	0.92~1.21
Biguanides	All OC	PsychENCODE(HCP100)	ENSG00000171503	4	159593277	ETFDH	rs4690906	4	159459912	T	C	0.503976	0.100243	0.0488812	0.0402914	NA	NA	1.10544	1.00~1.22
Biguanides	HGSOC	PsychENCODE(HCP100)	ENSG00000171503	4	159593277	ETFDH	rs4690906	4	159459912	T	C	0.503976	0.115379	0.0579186	0.0463613	NA	NA	1.1223	1.00~1.26
Biguanides	LGSOC	PsychENCODE(HCP100)	ENSG00000171503	4	159593277	ETFDH	rs4690906	4	159459912	T	C	0.503976	-0.142498	0.1704	0.403013	NA	NA	0.867189	0.62~1.21
Biguanides	Clear cell OC	PsychENCODE(HCP100)	ENSG00000171503	4	159593277	ETFDH	rs4690906	4	159459912	T	C	0.503976	0.223887	0.144287	0.12074	NA	NA	1.25093	0.94~1.66
Biguanides	Mucinous OC	PsychENCODE(HCP100)	ENSG00000171503	4	159593277	ETFDH	rs4690906	4	159459912	T	C	0.503976	0.179773	0.108741	0.0982863	NA	NA	1.19695	0.97~1.48
Biguanides	Endometrioid OC	PsychENCODE(HCP100)	ENSG00000171503	4	159593277	ETFDH	rs4690906	4	159459912	T	C	0.503976	0.185084	0.104463	0.076434	NA	NA	1.20332	0.98~1.48
Biguanides	HGSOC (Survival)	PsychENCODE(HCP100)	ENSG00000171503	4	159593277	ETFDH	rs4690906	4	159459912	T	C	0.503976	0.164206	0.0761312	0.0310148	NA	NA	1.17846	1.02~1.37
Biguanides	All OC (Histology Unadjusted)	PsychENCODE(HCP100)	ENSG00000171503	4	159593277	ETFDH	rs4690906	4	159459912	T	C	0.503976	0.060013	0.0626612	0.338195	NA	NA	1.06185	0.94~1.20
Biguanides	All OC (Histology Adjusted)	PsychENCODE(HCP100)	ENSG00000171503	4	159593277	ETFDH	rs4690906	4	159459912	T	C	0.503976	0.111993	0.0642183	0.0811683	NA	NA	1.11851	0.99~1.27
AGI	All OC	PsychENCODE(HCP100)	ENSG00000171298	17	78075355	GAA	rs35613574	17	78127292	C	A	0.578529	-0.0257098	0.0256631	0.316431	5	0.697511	0.974618	0.93~1.02
AGI	HGSOC	PsychENCODE(HCP100)	ENSG00000171298	17	78075355	GAA	rs35613574	17	78127292	C	A	0.578529	-0.0214376	0.0304455	0.481351	5	0.915943	0.978791	0.92~1.04
AGI	LGSOC	PsychENCODE(HCP100)	ENSG00000171298	17	78075355	GAA	rs35613574	17	78127292	C	A	0.578529	-0.102627	0.0927123	0.268318	5	0.18202	0.902464	0.75~1.08
AGI	Clear cell OC	PsychENCODE(HCP100)	ENSG00000171298	17	78075355	GAA	rs35613574	17	78127292	C	A	0.578529	-0.0670455	0.077611	0.387661	5	0.217442	0.935153	0.80~1.09
AGI	Mucinous OC	PsychENCODE(HCP100)	ENSG00000171298	17	78075355	GAA	rs35613574	17	78127292	C	A	0.578529	-0.0274802	0.0580933	0.636188	5	0.0839327	0.972894	0.87~1.09
AGI	Endometrioid OC	PsychENCODE(HCP100)	ENSG00000171298	17	78075355	GAA	rs35613574	17	78127292	C	A	0.578529	-0.0103436	0.0556775	0.85262	5	0.647223	0.98971	0.89~1.10
AGI	HGSOC (Survival)	PsychENCODE(HCP100)	ENSG00000171298	17	78075355	GAA	rs35613574	17	78127292	C	A	0.578529	-0.0680077	0.0394367	0.0846215	5	0.91029	0.934253	0.86~1.01
AGI	All OC (Histology Unadjusted)	PsychENCODE(HCP100)	ENSG00000171298	17	78075355	GAA	rs35613574	17	78127292	C	A	0.578529	-0.0432986	0.0336907	0.198729	5	0.378753	0.957625	0.90~1.02
AGI	All OC (Histology Adjusted)	PsychENCODE(HCP100)	ENSG00000171298	17	78075355	GAA	rs35613574	17	78127292	C	A	0.578529	-0.0508999	0.0337665	0.131705	5	0.385544	0.950374	0.89~1.02
AGI	All OC	PsychENCODE(HCP100)	ENSG00000089597	11	62392298	GANAB	rs7386	11	62430335	A	G	0.464215	0.00770367	0.05234	0.882986	NA	NA	1.00773	0.91~1.12
AGI	HGSOC	PsychENCODE(HCP100)	ENSG00000089597	11	62392298	GANAB	rs7386	11	62430335	A	G	0.464215	-0.0182258	0.0622848	0.769812	NA	NA	0.981939	0.87~1.11
AGI	LGSOC	PsychENCODE(HCP100)	ENSG00000089597	11	62392298	GANAB	rs7386	11	62430335	A	G	0.464215	0.0966454	0.189185	0.609456	NA	NA	1.10147	0.76~1.60
AGI	Clear cell OC	PsychENCODE(HCP100)	ENSG00000089597	11	62392298	GANAB	rs7386	11	62430335	A	G	0.464215	0.201981	0.161326	0.210568	NA	NA	1.22382	0.89~1.68
AGI	Mucinous OC	PsychENCODE(HCP100)	ENSG00000089597	11	62392298	GANAB	rs7386	11	62430335	A	G	0.464215	-0.0676291	0.119282	0.570735	NA	NA	0.934607	0.74~1.18
AGI	Endometrioid OC	PsychENCODE(HCP100)	ENSG00000089597	11	62392298	GANAB	rs7386	11	62430335	A	G	0.464215	0.230543	0.118695	0.0520991	NA	NA	1.25928	1.00~1.59
AGI	HGSOC (Survival)	PsychENCODE(HCP100)	ENSG00000089597	11	62392298	GANAB	rs7386	11	62430335	A	G	0.464215	-0.00147046	0.079984	0.985332	NA	NA	0.998531	0.85~1.17
AGI	All OC (Histology Unadjusted)	PsychENCODE(HCP100)	ENSG00000089597	11	62392298	GANAB	rs7386	11	62430335	A	G	0.464215	-0.0438645	0.0687674	0.52356	NA	NA	0.957084	0.84~1.10
AGI	All OC (Histology Adjusted)	PsychENCODE(HCP100)	ENSG00000089597	11	62392298	GANAB	rs7386	11	62430335	A	G	0.464215	-0.022106	0.0686139	0.747316	NA	NA	0.978137	0.86~1.12
TZDs	All OC	PsychENCODE(HCP100)	ENSG00000084207	11	67351066	GSTP1	rs6591245	11	67310936	C	G	0.411531	-0.00531056	0.0173093	0.758992	9	0.498511	0.994704	0.96~1.03
TZDs	HGSOC	PsychENCODE(HCP100)	ENSG00000084207	11	67351066	GSTP1	rs6591245	11	67310936	C	G	0.411531	-0.0196221	0.020645	0.341882	9	0.443366	0.980569	0.94~1.02
TZDs	LGSOC	PsychENCODE(HCP100)	ENSG00000084207	11	67351066	GSTP1	rs6591245	11	67310936	C	G	0.411531	-0.0205222	0.0624866	0.742591	9	0.783534	0.979687	0.87~1.11
TZDs	Clear cell OC	PsychENCODE(HCP100)	ENSG00000084207	11	67351066	GSTP1	rs6591245	11	67310936	C	G	0.411531	-0.0641896	0.0524695	0.22119	9	0.576218	0.937827	0.85~1.04
TZDs	Mucinous OC	PsychENCODE(HCP100)	ENSG00000084207	11	67351066	GSTP1	rs6591245	11	67310936	C	G	0.411531	-0.0109413	0.0392088	0.780205	9	0.649329	0.989118	0.92~1.07
TZDs	Endometrioid OC	PsychENCODE(HCP100)	ENSG00000084207	11	67351066	GSTP1	rs6591245	11	67310936	C	G	0.411531	0.0510482	0.0374412	0.172749	9	0.480263	1.05237	0.98~1.13
TZDs	HGSOC (Survival)	PsychENCODE(HCP100)	ENSG00000084207	11	67351066	GSTP1	rs6591245	11	67310936	C	G	0.411531	0.0169604	0.0269371	0.528938	9	0.142995	1.01711	0.96~1.07
TZDs	All OC (Histology Unadjusted)	PsychENCODE(HCP100)	ENSG00000084207	11	67351066	GSTP1	rs6591245	11	67310936	C	G	0.411531	0.000683043	0.0228624	0.976166	9	0.0369065	1.00068	0.96~1.05
TZDs	All OC (Histology Adjusted)	PsychENCODE(HCP100)	ENSG00000084207	11	67351066	GSTP1	rs6591245	11	67310936	C	G	0.411531	0.00617722	0.0229285	0.787612	9	0.0989437	1.0062	0.96~1.05
Insulin	All OC	PsychENCODE(HCP100)	ENSG00000140443	15	99192200	IGF1R	rs11637502	15	99522106	A	G	0.54672	-0.0830479	0.0628069	0.186077	5	0.533732	0.920307	0.81~1.04
Insulin	HGSOC	PsychENCODE(HCP100)	ENSG00000140443	15	99192200	IGF1R	rs11637502	15	99522106	A	G	0.54672	-0.0666785	0.0736972	0.365591	5	0.755466	0.935496	0.81~1.08
Insulin	LGSOC	PsychENCODE(HCP100)	ENSG00000140443	15	99192200	IGF1R	rs11637502	15	99522106	A	G	0.54672	0.179351	0.221801	0.418737	5	0.202641	1.19644	0.77~1.85
Insulin	Clear cell OC	PsychENCODE(HCP100)	ENSG00000140443	15	99192200	IGF1R	rs11637502	15	99522106	A	G	0.54672	-0.310662	0.192678	0.106888	5	0.0893198	0.732962	0.50~1.07
Insulin	Mucinous OC	PsychENCODE(HCP100)	ENSG00000140443	15	99192200	IGF1R	rs11637502	15	99522106	A	G	0.54672	0.0941684	0.138387	0.496205	5	0.665191	1.09874	0.84~1.44
Insulin	Endometrioid OC	PsychENCODE(HCP100)	ENSG00000140443	15	99192200	IGF1R	rs11637502	15	99522106	A	G	0.54672	-0.0845158	0.132795	0.52449	5	0.22604	0.918957	0.71~1.19
Insulin	HGSOC (Survival)	PsychENCODE(HCP100)	ENSG00000140443	15	99192200	IGF1R	rs11637502	15	99522106	A	G	0.54672	0.0677906	0.0958706	0.479501	5	0.55171	1.07014	0.89~1.29
Insulin	All OC (Histology Unadjusted)	PsychENCODE(HCP100)	ENSG00000140443	15	99192200	IGF1R	rs11637502	15	99522106	A	G	0.54672	0.0376985	0.0807493	0.640601	5	0.0750186	1.03842	0.89~1.22
Insulin	All OC (Histology Adjusted)	PsychENCODE(HCP100)	ENSG00000140443	15	99192200	IGF1R	rs11637502	15	99522106	A	G	0.54672	0.0325875	0.081255	0.688382	5	0.461049	1.03312	0.88~1.21
Insulin	All OC	PsychENCODE(HCP100)	ENSG00000163453	4	57896939	IGFBP7	rs1620509	4	57946388	A	T	0.599404	-0.000492152	0.0184285	0.978694	8	0.360814	0.999508	0.96~1.04
Insulin	HGSOC	PsychENCODE(HCP100)	ENSG00000163453	4	57896939	IGFBP7	rs1620509	4	57946388	A	T	0.599404	0.00665276	0.0219013	0.76131	8	0.154199	1.00667	0.96~1.05
Insulin	LGSOC	PsychENCODE(HCP100)	ENSG00000163453	4	57896939	IGFBP7	rs1620509	4	57946388	A	T	0.599404	-0.018306	0.0667235	0.783811	8	0.928885	0.981861	0.86~1.12
Insulin	Clear cell OC	PsychENCODE(HCP100)	ENSG00000163453	4	57896939	IGFBP7	rs1620509	4	57946388	A	T	0.599404	-0.0859768	0.0561617	0.125799	8	0.93673	0.917616	0.82~1.02
Insulin	Mucinous OC	PsychENCODE(HCP100)	ENSG00000163453	4	57896939	IGFBP7	rs1620509	4	57946388	A	T	0.599404	0.062635	0.0417623	0.133667	8	0.921834	1.06464	0.98~1.16
Insulin	Endometrioid OC	PsychENCODE(HCP100)	ENSG00000163453	4	57896939	IGFBP7	rs1620509	4	57946388	A	T	0.599404	-0.0442882	0.040135	0.269819	8	0.380373	0.956678	0.88~1.03
Insulin	HGSOC (Survival)	PsychENCODE(HCP100)	ENSG00000163453	4	57896939	IGFBP7	rs1620509	4	57946388	A	T	0.599404	0.00787633	0.0283256	0.780963	8	0.918167	1.00791	0.95~1.07
Insulin	All OC (Histology Unadjusted)	PsychENCODE(HCP100)	ENSG00000163453	4	57896939	IGFBP7	rs1620509	4	57946388	A	T	0.599404	0.0147537	0.0241545	0.541329	8	0.787	1.01486	0.97~1.06
Insulin	All OC (Histology Adjusted)	PsychENCODE(HCP100)	ENSG00000163453	4	57896939	IGFBP7	rs1620509	4	57946388	A	T	0.599404	0.00517467	0.0241868	0.830589	8	0.830049	1.00519	0.96~1.05
Sulfonylureas	All OC	PsychENCODE(HCP100)	ENSG00000177807	1	160007257	KCNJ10	rs6658419	1	160043589	T	C	0.528827	-0.0278234	0.0465686	0.550194	6	0.422584	0.97256	0.89~1.07
Sulfonylureas	HGSOC	PsychENCODE(HCP100)	ENSG00000177807	1	160007257	KCNJ10	rs6658419	1	160043589	T	C	0.528827	-0.0259717	0.055381	0.639095	6	0.455771	0.974363	0.87~1.09
Sulfonylureas	LGSOC	PsychENCODE(HCP100)	ENSG00000177807	1	160007257	KCNJ10	rs6658419	1	160043589	T	C	0.528827	0.127118	0.169994	0.454592	6	0.810919	1.13555	0.81~1.58
Sulfonylureas	Clear cell OC	PsychENCODE(HCP100)	ENSG00000177807	1	160007257	KCNJ10	rs6658419	1	160043589	T	C	0.528827	0.0467646	0.141703	0.741386	6	0.655585	1.04788	0.79~1.38
Sulfonylureas	Mucinous OC	PsychENCODE(HCP100)	ENSG00000177807	1	160007257	KCNJ10	rs6658419	1	160043589	T	C	0.528827	-0.0174199	0.105537	0.868897	6	0.675482	0.982731	0.80~1.21
Sulfonylureas	Endometrioid OC	PsychENCODE(HCP100)	ENSG00000177807	1	160007257	KCNJ10	rs6658419	1	160043589	T	C	0.528827	0.106248	0.102329	0.299129	6	0.378727	1.1121	0.91~1.36
Sulfonylureas	HGSOC (Survival)	PsychENCODE(HCP100)	ENSG00000177807	1	160007257	KCNJ10	rs6658419	1	160043589	T	C	0.528827	-0.0767698	0.0715694	0.283422	6	0.380544	0.926103	0.80~1.07
Sulfonylureas	All OC (Histology Unadjusted)	PsychENCODE(HCP100)	ENSG00000177807	1	160007257	KCNJ10	rs6658419	1	160043589	T	C	0.528827	-0.0685483	0.0613963	0.264213	6	0.826967	0.933748	0.83~1.05
Sulfonylureas	All OC (Histology Adjusted)	PsychENCODE(HCP100)	ENSG00000177807	1	160007257	KCNJ10	rs6658419	1	160043589	T	C	0.528827	-0.078105	0.0616781	0.205394	6	0.703282	0.924867	0.82~1.04
Sulfonylureas	All OC	PsychENCODE(HCP100)	ENSG00000187486	11	17407406	KCNJ11	rs10832728	11	17070581	G	A	0.498012	0.123341	0.0620627	0.0468827	5	0.607185	1.13127	1.00~1.28	*
Sulfonylureas	HGSOC	PsychENCODE(HCP100)	ENSG00000187486	11	17407406	KCNJ11	rs10832728	11	17070581	G	A	0.498012	0.153537	0.0742474	0.0386485	5	0.615218	1.16595	1.01~1.35	*
Sulfonylureas	LGSOC	PsychENCODE(HCP100)	ENSG00000187486	11	17407406	KCNJ11	rs10832728	11	17070581	G	A	0.498012	-0.0301139	0.210483	0.886235	5	0.426107	0.970335	0.64~1.47
Sulfonylureas	Clear cell OC	PsychENCODE(HCP100)	ENSG00000187486	11	17407406	KCNJ11	rs10832728	11	17070581	G	A	0.498012	0.0425822	0.176734	0.809601	5	0.0979266	1.0435	0.74~1.48
Sulfonylureas	Mucinous OC	PsychENCODE(HCP100)	ENSG00000187486	11	17407406	KCNJ11	rs10832728	11	17070581	G	A	0.498012	-0.0247591	0.132636	0.851919	5	0.509353	0.975545	0.75~1.27
Sulfonylureas	Endometrioid OC	PsychENCODE(HCP100)	ENSG00000187486	11	17407406	KCNJ11	rs10832728	11	17070581	G	A	0.498012	0.185596	0.130309	0.154365	5	0.218841	1.20394	0.93~1.55
Sulfonylureas	HGSOC (Survival)	PsychENCODE(HCP100)	ENSG00000187486	11	17407406	KCNJ11	rs10832728	11	17070581	G	A	0.498012	-0.00228183	0.0890297	0.979553	5	0.493839	0.997721	0.84~1.19
Sulfonylureas	All OC (Histology Unadjusted)	PsychENCODE(HCP100)	ENSG00000187486	11	17407406	KCNJ11	rs10832728	11	17070581	G	A	0.498012	0.0120741	0.0761897	0.874083	5	0.530437	1.01215	0.87~1.18
Sulfonylureas	All OC (Histology Adjusted)	PsychENCODE(HCP100)	ENSG00000187486	11	17407406	KCNJ11	rs10832728	11	17070581	G	A	0.498012	0.0156656	0.0762952	0.837315	5	0.489129	1.01579	0.87~1.18
AGI	All OC	PsychENCODE(HCP100)	ENSG00000257335	7	141607613	MGAM	rs17524275	7	141501943	C	G	0.473161	0.00810642	0.0188016	0.666355	10	0.757878	1.00814	0.97~1.05
AGI	HGSOC	PsychENCODE(HCP100)	ENSG00000257335	7	141607613	MGAM	rs17524275	7	141501943	C	G	0.473161	0.0171036	0.0223718	0.44456	10	0.804328	1.01725	0.97~1.06
AGI	LGSOC	PsychENCODE(HCP100)	ENSG00000257335	7	141607613	MGAM	rs17524275	7	141501943	C	G	0.473161	-0.0093401	0.0687007	0.891858	10	0.666134	0.990703	0.87~1.13
AGI	Clear cell OC	PsychENCODE(HCP100)	ENSG00000257335	7	141607613	MGAM	rs17524275	7	141501943	C	G	0.473161	-0.0463875	0.0572666	0.417924	10	0.598366	0.954672	0.85~1.07
AGI	Mucinous OC	PsychENCODE(HCP100)	ENSG00000257335	7	141607613	MGAM	rs17524275	7	141501943	C	G	0.473161	0.007708	0.042832	0.857185	10	0.142976	1.00774	0.93~1.10
AGI	Endometrioid OC	PsychENCODE(HCP100)	ENSG00000257335	7	141607613	MGAM	rs17524275	7	141501943	C	G	0.473161	0.0152396	0.0408884	0.709363	10	0.474862	1.01536	0.94~1.10
AGI	HGSOC (Survival)	PsychENCODE(HCP100)	ENSG00000257335	7	141607613	MGAM	rs17524275	7	141501943	C	G	0.473161	-0.0188538	0.0287598	0.512107	10	0.0624079	0.981323	0.93~1.04
AGI	All OC (Histology Unadjusted)	PsychENCODE(HCP100)	ENSG00000257335	7	141607613	MGAM	rs17524275	7	141501943	C	G	0.473161	-0.00784318	0.0246058	0.749914	10	0.0145972	0.992187	0.95~1.04
AGI	All OC (Histology Adjusted)	PsychENCODE(HCP100)	ENSG00000257335	7	141607613	MGAM	rs17524275	7	141501943	C	G	0.473161	-0.00517946	0.0246324	0.833457	10	0.0124055	0.994834	0.95~1.04
TZDs	All OC	PsychENCODE(HCP100)	ENSG00000204231	6	33161365	RXRB	rs28361090	6	33442575	T	C	0.511928	-0.017653	0.0359786	0.623672	5	0.686143	0.982502	0.92~1.05
TZDs	HGSOC	PsychENCODE(HCP100)	ENSG00000204231	6	33161365	RXRB	rs28361090	6	33442575	T	C	0.511928	-0.0183879	0.0427265	0.666932	5	0.810073	0.98178	0.90~1.07
TZDs	LGSOC	PsychENCODE(HCP100)	ENSG00000204231	6	33161365	RXRB	rs28361090	6	33442575	T	C	0.511928	0.165466	0.131504	0.208298	5	0.426784	1.17994	0.91~1.53
TZDs	Clear cell OC	PsychENCODE(HCP100)	ENSG00000204231	6	33161365	RXRB	rs28361090	6	33442575	T	C	0.511928	-0.0321604	0.109009	0.767974	5	0.156048	0.968351	0.78~1.20
TZDs	Mucinous OC	PsychENCODE(HCP100)	ENSG00000204231	6	33161365	RXRB	rs28361090	6	33442575	T	C	0.511928	0.0966712	0.0822117	0.239642	5	0.594278	1.1015	0.94~1.29
TZDs	Endometrioid OC	PsychENCODE(HCP100)	ENSG00000204231	6	33161365	RXRB	rs28361090	6	33442575	T	C	0.511928	-0.0711001	0.078191	0.363185	5	0.405706	0.931369	0.80~1.09
TZDs	HGSOC (Survival)	PsychENCODE(HCP100)	ENSG00000204231	6	33161365	RXRB	rs28361090	6	33442575	T	C	0.511928	0.0136804	0.0548493	0.803038	5	0.367463	1.01377	0.91~1.13
TZDs	All OC (Histology Unadjusted)	PsychENCODE(HCP100)	ENSG00000204231	6	33161365	RXRB	rs28361090	6	33442575	T	C	0.511928	-0.0333807	0.0470189	0.47774	5	0.245805	0.96717	0.88~1.06
TZDs	All OC (Histology Adjusted)	PsychENCODE(HCP100)	ENSG00000204231	6	33161365	RXRB	rs28361090	6	33442575	T	C	0.511928	-0.0246111	0.047066	0.601039	5	0.187614	0.975689	0.89~1.07
TZDs	All OC	PsychENCODE(HCP100)	ENSG00000106366	7	100770370	SERPINE1	rs2014315	7	100787241	T	C	0.45328	0.0984581	0.0521646	0.0590995	4	0.790632	1.10347	1.00~1.22
TZDs	HGSOC	PsychENCODE(HCP100)	ENSG00000106366	7	100770370	SERPINE1	rs2014315	7	100787241	T	C	0.45328	0.12148	0.0621805	0.0507403	4	0.865974	1.12917	1.00~1.28
TZDs	LGSOC	PsychENCODE(HCP100)	ENSG00000106366	7	100770370	SERPINE1	rs2014315	7	100787241	T	C	0.45328	0.0278462	0.182246	0.87856	4	0.167334	1.02824	0.72~1.47
TZDs	Clear cell OC	PsychENCODE(HCP100)	ENSG00000106366	7	100770370	SERPINE1	rs2014315	7	100787241	T	C	0.45328	0.0738343	0.152031	0.627213	4	0.0791467	1.07663	0.80~1.45
TZDs	Mucinous OC	PsychENCODE(HCP100)	ENSG00000106366	7	100770370	SERPINE1	rs2014315	7	100787241	T	C	0.45328	0.0465283	0.113671	0.682301	4	0.171661	1.04763	0.84~1.31
TZDs	Endometrioid OC	PsychENCODE(HCP100)	ENSG00000106366	7	100770370	SERPINE1	rs2014315	7	100787241	T	C	0.45328	0.058151	0.109065	0.593912	4	0.499827	1.05988	0.86~1.31
TZDs	HGSOC (Survival)	PsychENCODE(HCP100)	ENSG00000106366	7	100770370	SERPINE1	rs2014315	7	100787241	T	C	0.45328	-0.0323351	0.077366	0.675984	4	0.824384	0.968182	0.83~1.13
TZDs	All OC (Histology Unadjusted)	PsychENCODE(HCP100)	ENSG00000106366	7	100770370	SERPINE1	rs2014315	7	100787241	T	C	0.45328	0.0321712	0.0661754	0.626861	4	0.488998	1.03269	0.91~1.18
TZDs	All OC (Histology Adjusted)	PsychENCODE(HCP100)	ENSG00000106366	7	100770370	SERPINE1	rs2014315	7	100787241	T	C	0.45328	-0.006508	0.0662415	0.921736	4	0.543501	0.993513	0.87~1.13
Sulfonylureas	All OC	PsychENCODE(HCP100)	ENSG00000130529	19	49660998	TRPM4	rs4802581	19	49666573	T	C	0.555666	0.0615385	0.0585686	0.293393	NA	NA	1.06347	0.95~1.19
Sulfonylureas	HGSOC	PsychENCODE(HCP100)	ENSG00000130529	19	49660998	TRPM4	rs4802581	19	49666573	T	C	0.555666	0.0747778	0.0695989	0.282638	NA	NA	1.07764	0.94~1.24
Sulfonylureas	LGSOC	PsychENCODE(HCP100)	ENSG00000130529	19	49660998	TRPM4	rs4802581	19	49666573	T	C	0.555666	0.218082	0.208668	0.295971	NA	NA	1.24369	0.83~1.87
Sulfonylureas	Clear cell OC	PsychENCODE(HCP100)	ENSG00000130529	19	49660998	TRPM4	rs4802581	19	49666573	T	C	0.555666	0.0136888	0.173515	0.937119	NA	NA	1.01378	0.72~1.42
Sulfonylureas	Mucinous OC	PsychENCODE(HCP100)	ENSG00000130529	19	49660998	TRPM4	rs4802581	19	49666573	T	C	0.555666	-0.120094	0.131996	0.362913	NA	NA	0.886837	0.68~1.15
Sulfonylureas	Endometrioid OC	PsychENCODE(HCP100)	ENSG00000130529	19	49660998	TRPM4	rs4802581	19	49666573	T	C	0.555666	0.0460926	0.125173	0.712702	NA	NA	1.04717	0.82~1.34
Sulfonylureas	HGSOC (Survival)	PsychENCODE(HCP100)	ENSG00000130529	19	49660998	TRPM4	rs4802581	19	49666573	T	C	0.555666	-0.0460926	0.0888945	0.604104	NA	NA	0.954954	0.80~1.14
Sulfonylureas	All OC (Histology Unadjusted)	PsychENCODE(HCP100)	ENSG00000130529	19	49660998	TRPM4	rs4802581	19	49666573	T	C	0.555666	-0.04597	0.0761947	0.546294	NA	NA	0.955071	0.82~1.11
Sulfonylureas	All OC (Histology Adjusted)	PsychENCODE(HCP100)	ENSG00000130529	19	49660998	TRPM4	rs4802581	19	49666573	T	C	0.555666	-0.080662	0.0769264	0.29438	NA	NA	0.922505	0.79~1.07
Insulin	All OC	GTEx(V8)-Ovary	ENSG00000109472	4	166282346	CPE	rs1438110	4	166314972	T	C	0.5	-0.0225605	0.0230135	0.326931	11	0.915098	0.977692	0.93~1.02
Insulin	HGSOC	GTEx(V8)-Ovary	ENSG00000109472	4	166282346	CPE	rs1438110	4	166314972	T	C	0.5	-0.0515522	0.0279417	0.0650387	11	0.540714	0.949754	0.90~1.00
Insulin	LGSOC	GTEx(V8)-Ovary	ENSG00000109472	4	166282346	CPE	rs1438110	4	166314972	T	C	0.5	-0.0202735	0.0827674	0.806499	11	0.557867	0.979931	0.83~1.15
Insulin	Clear cell OC	GTEx(V8)-Ovary	ENSG00000109472	4	166282346	CPE	rs1438110	4	166314972	T	C	0.5	0.0272205	0.0694866	0.695252	11	0.69818	1.02759	0.90~1.18
Insulin	Mucinous OC	GTEx(V8)-Ovary	ENSG00000109472	4	166282346	CPE	rs1438110	4	166314972	T	C	0.5	0.0459636	0.0523067	0.379546	11	0.827169	1.04704	0.95~1.16
Insulin	Endometrioid OC	GTEx(V8)-Ovary	ENSG00000109472	4	166282346	CPE	rs1438110	4	166314972	T	C	0.5	-0.0280631	0.0498218	0.573252	11	0.0947593	0.972327	0.88~1.07
Insulin	HGSOC (Survival)	GTEx(V8)-Ovary	ENSG00000109472	4	166282346	CPE	rs1438110	4	166314972	T	C	0.5	0.00533233	0.0349994	0.878907	11	0.724037	1.00535	0.94~1.08
Insulin	All OC (Histology Unadjusted)	GTEx(V8)-Ovary	ENSG00000109472	4	166282346	CPE	rs1438110	4	166314972	T	C	0.5	0.00746973	0.0298664	0.802506	11	0.998117	1.0075	0.95~1.07
Insulin	All OC (Histology Adjusted)	GTEx(V8)-Ovary	ENSG00000109472	4	166282346	CPE	rs1438110	4	166314972	T	C	0.5	0.0127745	0.0298952	0.669153	11	0.559284	1.01286	0.96~1.07
AGI	All OC	GTEx(V8)-Ovary	ENSG00000171298	17	78075355	GAA	rs12051781	17	78074468	G	A	0.377734	-0.0365659	0.0266598	0.170195	6	0.988966	0.964095	0.92~1.02
AGI	HGSOC	GTEx(V8)-Ovary	ENSG00000171298	17	78075355	GAA	rs12051781	17	78074468	G	A	0.377734	-0.0371467	0.0315275	0.238705	6	0.904596	0.963535	0.91~1.02
AGI	LGSOC	GTEx(V8)-Ovary	ENSG00000171298	17	78075355	GAA	rs12051781	17	78074468	G	A	0.377734	-0.118544	0.0960762	0.217257	6	0.745192	0.888213	0.74~1.07
AGI	Clear cell OC	GTEx(V8)-Ovary	ENSG00000171298	17	78075355	GAA	rs12051781	17	78074468	G	A	0.377734	0.0454703	0.0792499	0.566131	6	0.0661067	1.04652	0.90~1.22
AGI	Mucinous OC	GTEx(V8)-Ovary	ENSG00000171298	17	78075355	GAA	rs12051781	17	78074468	G	A	0.377734	0.0240611	0.0591611	0.684225	6	0.252231	1.02435	0.91~1.15
AGI	Endometrioid OC	GTEx(V8)-Ovary	ENSG00000171298	17	78075355	GAA	rs12051781	17	78074468	G	A	0.377734	-0.0962638	0.0584497	0.0995677	6	0.621488	0.908224	0.81~1.02
AGI	HGSOC (Survival)	GTEx(V8)-Ovary	ENSG00000171298	17	78075355	GAA	rs12051781	17	78074468	G	A	0.377734	-0.0836622	0.0420713	0.0467474	6	0.885121	0.919742	0.85~1.00	*
AGI	All OC (Histology Unadjusted)	GTEx(V8)-Ovary	ENSG00000171298	17	78075355	GAA	rs12051781	17	78074468	G	A	0.377734	-0.0430506	0.0349735	0.218341	6	0.820924	0.957863	0.89~1.03
AGI	All OC (Histology Adjusted)	GTEx(V8)-Ovary	ENSG00000171298	17	78075355	GAA	rs12051781	17	78074468	G	A	0.377734	-0.0521098	0.0353048	0.139944	6	0.930026	0.949225	0.89~1.02
AGI	All OC	GTEx(V8)-Whole blood	ENSG00000171298	17	78075355	GAA	rs12940486	17	78118569	C	T	0.578529	-0.0520683	0.045146	0.248774	9	0.825001	0.949264	0.87~1.04
AGI	HGSOC	GTEx(V8)-Whole blood	ENSG00000171298	17	78075355	GAA	rs12940486	17	78118569	C	T	0.578529	-0.0500357	0.0535725	0.350313	9	0.980702	0.951195	0.86~1.06
AGI	LGSOC	GTEx(V8)-Whole blood	ENSG00000171298	17	78075355	GAA	rs12940486	17	78118569	C	T	0.578529	-0.173245	0.16279	0.287226	9	0.41349	0.840932	0.61~1.16
AGI	Clear cell OC	GTEx(V8)-Whole blood	ENSG00000171298	17	78075355	GAA	rs12940486	17	78118569	C	T	0.578529	-0.117179	0.136403	0.390306	9	0.25272	0.889426	0.68~1.16
AGI	Mucinous OC	GTEx(V8)-Whole blood	ENSG00000171298	17	78075355	GAA	rs12940486	17	78118569	C	T	0.578529	-0.0625701	0.102158	0.54022	9	0.424088	0.939347	0.77~1.15
AGI	Endometrioid OC	GTEx(V8)-Whole blood	ENSG00000171298	17	78075355	GAA	rs12940486	17	78118569	C	T	0.578529	-0.0283852	0.097828	0.771698	9	0.3753	0.972014	0.80~1.18
AGI	HGSOC (Survival)	GTEx(V8)-Whole blood	ENSG00000171298	17	78075355	GAA	rs12940486	17	78118569	C	T	0.578529	-0.113792	0.0693332	0.10075	9	0.644301	0.892444	0.78~1.02
AGI	All OC (Histology Unadjusted)	GTEx(V8)-Whole blood	ENSG00000171298	17	78075355	GAA	rs12940486	17	78118569	C	T	0.578529	-0.0775435	0.0592357	0.190511	9	0.574282	0.925387	0.82~1.04
AGI	All OC (Histology Adjusted)	GTEx(V8)-Whole blood	ENSG00000171298	17	78075355	GAA	rs12940486	17	78118569	C	T	0.578529	-0.0882824	0.059365	0.136985	9	0.709474	0.915502	0.81~1.03
Other drugs	All OC	GTEx(V8)-Whole blood	ENSG00000132329	2	238767536	RAMP1	rs4663269	2	238806370	C	T	0.512922	0.119491	0.0689465	0.0830778	6	0.928161	1.12692	0.98~1.29
Other drugs	HGSOC	GTEx(V8)-Whole blood	ENSG00000132329	2	238767536	RAMP1	rs4663269	2	238806370	C	T	0.512922	0.24949	0.0868639	0.00407635	6	0.458336	1.28337	1.08~1.52	**
Other drugs	LGSOC	GTEx(V8)-Whole blood	ENSG00000132329	2	238767536	RAMP1	rs4663269	2	238806370	C	T	0.512922	-0.337357	0.246358	0.170881	6	0.367408	0.713654	0.44~1.16
Other drugs	Clear cell OC	GTEx(V8)-Whole blood	ENSG00000132329	2	238767536	RAMP1	rs4663269	2	238806370	C	T	0.512922	0.00212282	0.202892	0.991652	6	0.797048	1.00213	0.67~1.49
Other drugs	Mucinous OC	GTEx(V8)-Whole blood	ENSG00000132329	2	238767536	RAMP1	rs4663269	2	238806370	C	T	0.512922	-0.360656	0.159505	0.0237528	6	0.39962	0.697219	0.51~0.95	*
Other drugs	Endometrioid OC	GTEx(V8)-Whole blood	ENSG00000132329	2	238767536	RAMP1	rs4663269	2	238806370	C	T	0.512922	0.249033	0.148926	0.0944861	6	0.372395	1.28278	0.96~1.72
Other drugs	HGSOC (Survival)	GTEx(V8)-Whole blood	ENSG00000132329	2	238767536	RAMP1	rs4663269	2	238806370	C	T	0.512922	0.00669029	0.103201	0.948311	6	0.855056	1.00671	0.82~1.23
Other drugs	All OC (Histology Unadjusted)	GTEx(V8)-Whole blood	ENSG00000132329	2	238767536	RAMP1	rs4663269	2	238806370	C	T	0.512922	-0.0379286	0.0882288	0.667277	6	0.652046	0.962782	0.81~1.14
Other drugs	All OC (Histology Adjusted)	GTEx(V8)-Whole blood	ENSG00000132329	2	238767536	RAMP1	rs4663269	2	238806370	C	T	0.512922	-0.0408016	0.088507	0.6448	6	0.662848	0.96002	0.81~1.14
Sulfonylureas	All OC	GTEx(V8)-Whole blood	ENSG00000130529	19	49660998	TRPM4	rs3745300	19	49658875	G	T	0.457256	-0.00864123	0.0616922	0.888605	10	0.995125	0.991396	0.88~1.12
Sulfonylureas	HGSOC	GTEx(V8)-Whole blood	ENSG00000130529	19	49660998	TRPM4	rs3745300	19	49658875	G	T	0.457256	-0.0833584	0.0744516	0.26287	10	0.746372	0.920021	0.80~1.06
Sulfonylureas	LGSOC	GTEx(V8)-Whole blood	ENSG00000130529	19	49660998	TRPM4	rs3745300	19	49658875	G	T	0.457256	0.144737	0.221178	0.512857	10	0.847494	1.15574	0.75~1.78
Sulfonylureas	Clear cell OC	GTEx(V8)-Whole blood	ENSG00000130529	19	49660998	TRPM4	rs3745300	19	49658875	G	T	0.457256	-0.0351714	0.185666	0.849753	10	0.970639	0.96544	0.67~1.39
Sulfonylureas	Mucinous OC	GTEx(V8)-Whole blood	ENSG00000130529	19	49660998	TRPM4	rs3745300	19	49658875	G	T	0.457256	0.0857241	0.140061	0.540505	10	0.455162	1.08951	0.83~1.43
Sulfonylureas	Endometrioid OC	GTEx(V8)-Whole blood	ENSG00000130529	19	49660998	TRPM4	rs3745300	19	49658875	G	T	0.457256	0.137468	0.134712	0.30751	10	0.701859	1.14736	0.88~1.49
Sulfonylureas	HGSOC (Survival)	GTEx(V8)-Whole blood	ENSG00000130529	19	49660998	TRPM4	rs3745300	19	49658875	G	T	0.457256	0.024857	0.095424	0.794486	10	0.209177	1.02517	0.85~1.24
Sulfonylureas	All OC (Histology Unadjusted)	GTEx(V8)-Whole blood	ENSG00000130529	19	49660998	TRPM4	rs3745300	19	49658875	G	T	0.457256	0.0861542	0.0813973	0.289855	10	0.319701	1.08997	0.93~1.28
Sulfonylureas	All OC (Histology Adjusted)	GTEx(V8)-Whole blood	ENSG00000130529	19	49660998	TRPM4	rs3745300	19	49658875	G	T	0.457256	0.104134	0.0822837	0.205677	10	0.184122	1.10975	0.94~1.30
This table shows the results from an SMR (Summary-data based Mendelian Randomization) analysis, focusing on the impacts of specific drug targets on risk and survival of different types of ovarian cancer(OC). Each row captures different OC outcomes linked to specific drug targets, detailing the results through probe IDs and top associated SNPs (eQTL). Key metrics reported include the allele freque…

## Sheet: Table S10
Results of colocalization.
Drug	Gene	Outcome	nsnps	PP.H0.abf	PP.H1.abf	PP.H2.abf	PP.H3.abf	PP.H4.abf
Sulfonylureas	ABCA1	All OC	4929	2.18e-45	3.77e-46	0.71984	0.124359	0.155802
Other drugs	AKR1A1	All OC	2745	6.72e-28	4.71e-29	0.783453	0.0549342	0.161613
Other drugs	AKR1B1	All OC	4048	2.76e-240	5.18e-241	0.751736	0.141144	0.107119
Insulin	CCN3	All OC	3991	1.19e-81	1.8e-82	0.750971	0.113099	0.13593
Other drugs	CD3E	All OC	3779	2.42e-67	4.21e-68	0.723702	0.126163	0.150135
Sulfonylureas	CPT1A	All OC	3889	1.86e-256	1.01e-256	0.574763	0.311928	0.113309
DPP4i	DPP4	All OC	2669	2.96e-49	2.87e-50	0.751304	0.072883	0.175813
Biguanides	ETFDH	All OC	2782	6.76e-303	5.82e-304	0.583567	0.0503036	0.36613
AGI	GAA	All OC	4244	7.79e-305	2.08e-305	0.574334	0.153008	0.272658
AGI	GANAB	All OC	3055	3.3e-53	8.17e-52	0.0381845	0.944271	0.0175443
Other drugs	GCK	All OC	2992	1.13e-21	6.92e-23	0.708661	0.0434023	0.247937
GLP-1RA	GLP1R	All OC	4587	2.07e-12	2.88e-13	0.756445	0.105336	0.138219
TZDs	GSTP1	All OC	3855	2.9e-05	4.83e-06	0.658344	0.109828	0.231794
DPP4i	HMGCR	All OC	3080	4.09e-44	4.14e-45	0.708539	0.0716627	0.219798
Insulin	IGF1R	All OC	5473	5.45e-77	1.48e-77	0.708341	0.19175	0.0999084
Insulin	IGFBP7	All OC	5101	3.69e-134	5.31e-135	0.789042	0.113539	0.097419
Insulin	INSR	All OC	5773	9.73e-13	1.55e-13	0.706525	0.112665	0.180811
DPP4i	ITGAL	All OC	1481	3.13e-143	1.14e-144	0.69432	0.0252318	0.280448
Sulfonylureas	KCNJ10	All OC	3479	1.9e-68	8.38e-69	0.608918	0.268373	0.122709
Sulfonylureas	KCNJ11	All OC	3059	6.51e-32	4.14e-32	0.456113	0.28972	0.254167
AGI	MGAM	All OC	3676	5.44e-196	5.64e-197	0.780969	0.0809659	0.138066
TZDs	PPARA	All OC	4770	2.85e-11	4.66e-12	0.767848	0.12565	0.106503
Sulfonylureas	PPARG	All OC	4083	4.94e-215	8.27e-216	0.76506	0.128129	0.106811
Biguanides	PRKAA1	All OC	3740	5.39e-19	5.48e-20	0.58086	0.0590818	0.360058
Other drugs	RAMP1	All OC	4897	5.73e-147	8.11e-148	0.754478	0.106756	0.138766
Other drugs	RAMP3	All OC	3898	8.87e-217	3.47e-217	0.506116	0.197737	0.296147
TZDs	SERPINE1	All OC	4237	6.81e-15	1.16e-15	0.67824	0.115295	0.206465
Other drugs	SIGMAR1	All OC	2981	1.86e-299	1.41e-300	0.629997	0.0476302	0.322373
TZDs	SLC29A1	All OC	4031	9.23e-34	1.82e-34	0.456441	0.0900721	0.453487
Biguanides	SLC47A1	All OC	2520	8.52e-244	1.5e-244	0.478793	0.084126	0.437081
Sulfonylureas	TRPM4	All OC	3983	2.54e-182	3.15e-183	0.682027	0.0844646	0.233508
Sulfonylureas	VEGFA	All OC	3490	1.34e-184	2.35e-185	0.6217	0.108812	0.269489
Sulfonylureas	ABCA1	HGSOC	4928	2.06e-45	3.69e-46	0.677412	0.121549	0.201039
Other drugs	AKR1A1	HGSOC	2744	6.3e-28	5.93e-29	0.733963	0.0691294	0.196908
Other drugs	AKR1B1	HGSOC	4048	2.65e-240	5.38e-241	0.72304	0.146405	0.130555
Insulin	CCN3	HGSOC	3990	1.14e-81	1.93e-82	0.717027	0.121563	0.16141
Other drugs	CD3E	HGSOC	3779	2.38e-67	3.75e-68	0.711513	0.112203	0.176284
Sulfonylureas	CPT1A	HGSOC	3888	2.3e-256	3.65e-257	0.711937	0.112935	0.175129
DPP4i	DPP4	HGSOC	2670	2.77e-49	2.73e-50	0.702331	0.0692861	0.228383
Biguanides	ETFDH	HGSOC	2782	6.48e-303	7.79e-304	0.560142	0.0672705	0.372587
AGI	GAA	HGSOC	4244	9.22e-305	1.24e-305	0.679371	0.0911765	0.229453
AGI	GANAB	HGSOC	3055	2.45e-52	5.34e-52	0.283512	0.616761	0.0997273
Other drugs	GCK	HGSOC	2991	1.17e-21	1.29e-22	0.736358	0.0807734	0.182868
GLP-1RA	GLP1R	HGSOC	4587	2e-12	2.71e-13	0.730185	0.098943	0.170872
TZDs	GSTP1	HGSOC	3856	1.9e-05	8.95e-06	0.431384	0.203264	0.365325
DPP4i	HMGCR	HGSOC	3080	4.33e-44	3.72e-45	0.749375	0.0644202	0.186205
Insulin	IGF1R	HGSOC	5473	5.33e-77	1.54e-77	0.692063	0.19994	0.107997
Insulin	IGFBP7	HGSOC	5101	3.42e-134	6.22e-135	0.73213	0.132896	0.134974
Insulin	INSR	HGSOC	5773	1.02e-12	2e-13	0.740658	0.145229	0.114112
DPP4i	ITGAL	HGSOC	1480	2.75e-143	2.72e-144	0.610196	0.0602347	0.32957
Sulfonylureas	KCNJ10	HGSOC	3478	2.22e-68	4e-69	0.710757	0.128182	0.161061
Sulfonylureas	KCNJ11	HGSOC	3058	3.71e-32	8.42e-32	0.259854	0.589985	0.150162
AGI	MGAM	HGSOC	3675	5.11e-196	6.77e-197	0.732901	0.0971424	0.169956
TZDs	PPARA	HGSOC	4770	2.68e-11	5.35e-12	0.720681	0.144239	0.13508
Sulfonylureas	PPARG	HGSOC	4084	4.91e-215	5.73e-216	0.761876	0.0887505	0.149374
Biguanides	PRKAA1	HGSOC	3739	6.94e-19	6.67e-20	0.748065	0.0718625	0.180073
Other drugs	RAMP1	HGSOC	4896	5.4e-147	1.07e-147	0.710463	0.140275	0.149262
Other drugs	RAMP3	HGSOC	3897	1.02e-216	2.21e-217	0.581011	0.126043	0.292946
TZDs	SERPINE1	HGSOC	4236	7.31e-15	1.17e-15	0.727977	0.116335	0.155688
Other drugs	SIGMAR1	HGSOC	2980	1.73e-299	1.74e-300	0.584307	0.0588554	0.356837
TZDs	SLC29A1	HGSOC	4031	8.14e-34	1.36e-34	0.402627	0.0669844	0.530389
Biguanides	SLC47A1	HGSOC	2518	8.97e-244	8.29e-245	0.503737	0.0465398	0.449724
Sulfonylureas	TRPM4	HGSOC	3983	2.31e-182	4.64e-183	0.619038	0.124443	0.256519
Sulfonylureas	VEGFA	HGSOC	3490	1.47e-184	2.51e-185	0.679652	0.11607	0.204278
Sulfonylureas	ABCA1	LGSOC	4924	1.19e-45	4.43e-46	0.393599	0.145962	0.460439
Other drugs	AKR1A1	LGSOC	2738	2.34e-28	4.45e-29	0.273051	0.0518446	0.675104
Other drugs	AKR1B1	LGSOC	4048	1.97e-240	5.45e-241	0.537445	0.148536	0.314019
Insulin	CCN3	LGSOC	3988	7.87e-82	2.18e-82	0.494844	0.136964	0.368191
Other drugs	CD3E	LGSOC	3772	1.65e-67	4.52e-68	0.494499	0.135494	0.370006
Sulfonylureas	CPT1A	LGSOC	3888	1.42e-256	3.53e-257	0.438376	0.109243	0.452381
DPP4i	DPP4	LGSOC	2666	1.93e-49	3.51e-50	0.489841	0.0891368	0.421022
Biguanides	ETFDH	LGSOC	2780	5.02e-303	8.76e-304	0.43401	0.0756869	0.490303
AGI	GAA	LGSOC	4237	4.89e-305	2.18e-305	0.360609	0.160439	0.478952
AGI	GANAB	LGSOC	3055	3.6e-52	1.13e-52	0.415974	0.131053	0.452973
Other drugs	GCK	LGSOC	2991	2.81e-22	8.56e-23	0.176098	0.0536739	0.770228
GLP-1RA	GLP1R	LGSOC	4585	1.39e-12	4.42e-13	0.507289	0.161521	0.33119
TZDs	GSTP1	LGSOC	3853	2.25e-05	6.11e-06	0.510967	0.138752	0.350252
DPP4i	HMGCR	LGSOC	3073	2.72e-44	9.68e-45	0.470577	0.167648	0.361774
Insulin	IGF1R	LGSOC	5471	4.21e-77	1.49e-77	0.546839	0.193592	0.259569
Insulin	IGFBP7	LGSOC	5099	2.5e-134	1.03e-134	0.534063	0.220688	0.245249
Insulin	INSR	LGSOC	5769	6.18e-13	3.53e-13	0.44831	0.256002	0.295688
DPP4i	ITGAL	LGSOC	1473	1.19e-143	1.15e-144	0.264375	0.0255228	0.710102
Sulfonylureas	KCNJ10	LGSOC	3471	1.56e-68	4.3e-69	0.498837	0.137689	0.363474
Sulfonylureas	KCNJ11	LGSOC	3057	7.34e-32	1.45e-32	0.514107	0.101582	0.384311
AGI	MGAM	LGSOC	3674	2.44e-196	6.92e-197	0.350257	0.0993126	0.55043
TZDs	PPARA	LGSOC	4763	1.34e-11	4.87e-12	0.361375	0.131106	0.507519
Sulfonylureas	PPARG	LGSOC	4074	3.42e-215	9.1e-216	0.529683	0.141062	0.329255
Biguanides	PRKAA1	LGSOC	3736	4.76e-19	1.21e-19	0.513213	0.12986	0.356927
Other drugs	RAMP1	LGSOC	4895	3.96e-147	1.21e-147	0.52164	0.15871	0.31965
Other drugs	RAMP3	LGSOC	3895	7.49e-217	2.69e-217	0.427251	0.15364	0.419109
TZDs	SERPINE1	LGSOC	4236	4.98e-15	1.75e-15	0.496191	0.174561	0.329248
Other drugs	SIGMAR1	LGSOC	2978	9.72e-300	1.86e-300	0.328646	0.0629239	0.60843
TZDs	SLC29A1	LGSOC	4021	9.38e-34	3.17e-34	0.463637	0.156617	0.379746
Biguanides	SLC47A1	LGSOC	2513	8.41e-244	1.49e-244	0.472265	0.0835845	0.44415
Sulfonylureas	TRPM4	LGSOC	3980	1.06e-182	3.46e-183	0.285194	0.0927897	0.622017
Sulfonylureas	VEGFA	LGSOC	3482	9.5e-185	3.11e-185	0.440022	0.143829	0.416149
Sulfonylureas	ABCA1	Clear cell OC	4923	1.56e-45	7.01e-46	0.513043	0.231119	0.255838
Other drugs	AKR1A1	Clear cell OC	2741	2.24e-28	4e-29	0.260851	0.0466532	0.692496
Other drugs	AKR1B1	Clear cell OC	4048	1.83e-240	6.11e-241	0.499236	0.166315	0.334449
Insulin	CCN3	Clear cell OC	3988	2.58e-82	6.68e-83	0.162544	0.0419887	0.795467
Other drugs	CD3E	Clear cell OC	3777	1.68e-67	6.48e-68	0.502266	0.194033	0.303701
Sulfonylureas	CPT1A	Clear cell OC	3888	9.81e-257	2.81e-257	0.30344	0.0870202	0.60954
DPP4i	DPP4	Clear cell OC	2667	2.03e-49	4.16e-50	0.514474	0.105548	0.379978
Biguanides	ETFDH	Clear cell OC	2782	4.62e-303	7.65e-304	0.398763	0.0661078	0.535129
AGI	GAA	Clear cell OC	4240	6.06e-305	2.22e-305	0.446777	0.163375	0.389848
AGI	GANAB	Clear cell OC	3055	3.2e-52	8.27e-53	0.370295	0.0955145	0.534191
Other drugs	GCK	Clear cell OC	2990	8.64e-22	1.45e-22	0.541761	0.0910827	0.367156
GLP-1RA	GLP1R	Clear cell OC	4587	1.46e-12	4.37e-13	0.533103	0.159651	0.307245
TZDs	GSTP1	Clear cell OC	3854	2.18e-05	6.27e-06	0.495937	0.142406	0.361628
DPP4i	HMGCR	Clear cell OC	3075	1.29e-44	2.54e-45	0.223077	0.0439303	0.732992
Insulin	IGF1R	Clear cell OC	5473	4.32e-77	1.6e-77	0.560915	0.207931	0.231153
Insulin	IGFBP7	Clear cell OC	5101	2.63e-134	8.44e-135	0.562704	0.1804	0.256896
Insulin	INSR	Clear cell OC	5771	2.41e-13	1.11e-13	0.174866	0.0808093	0.744325
DPP4i	ITGAL	Clear cell OC	1479	1.12e-143	2.14e-144	0.248253	0.0474498	0.704297
Sulfonylureas	KCNJ10	Clear cell OC	3474	1.63e-68	5.73e-69	0.520579	0.18347	0.295951
Sulfonylureas	KCNJ11	Clear cell OC	3059	4.14e-32	7.71e-33	0.289798	0.0540028	0.6562
AGI	MGAM	Clear cell OC	3674	3.03e-196	8.36e-197	0.434723	0.119852	0.445425
TZDs	PPARA	Clear cell OC	4767	1.94e-11	8.32e-12	0.521757	0.224141	0.254102
Sulfonylureas	PPARG	Clear cell OC	4077	3.45e-215	1.01e-215	0.534394	0.155906	0.3097
Biguanides	PRKAA1	Clear cell OC	3740	3e-19	7.32e-20	0.323009	0.0789088	0.598082
Other drugs	RAMP1	Clear cell OC	4897	3.29e-147	1.33e-147	0.433726	0.175542	0.390732
Other drugs	RAMP3	Clear cell OC	3897	9.11e-217	2.89e-217	0.519712	0.164987	0.315301
TZDs	SERPINE1	Clear cell OC	4237	5.38e-15	1.55e-15	0.536301	0.154543	0.309157
Other drugs	SIGMAR1	Clear cell OC	2980	9.83e-300	2.24e-300	0.332458	0.0757124	0.591829
TZDs	SLC29A1	Clear cell OC	4032	1.06e-33	2.82e-34	0.525844	0.139417	0.33474
Biguanides	SLC47A1	Clear cell OC	2516	9.84e-245	2.61e-245	0.055289	0.0146611	0.93005
Sulfonylureas	TRPM4	Clear cell OC	3982	1.87e-182	5.86e-183	0.500808	0.156971	0.342221
Sulfonylureas	VEGFA	Clear cell OC	3490	5.79e-185	1.44e-185	0.267945	0.0668862	0.665169
Sulfonylureas	ABCA1	Endometrioid OC	4928	1.8e-45	4.72e-46	0.594338	0.155704	0.249957
Other drugs	AKR1A1	Endometrioid OC	2741	4.81e-28	5.91e-29	0.560477	0.0688582	0.370665
Other drugs	AKR1B1	Endometrioid OC	4048	2.08e-240	4.74e-241	0.56606	0.12901	0.30493
Insulin	CCN3	Endometrioid OC	3989	9.36e-82	2.47e-82	0.58893	0.155384	0.255686
Other drugs	CD3E	Endometrioid OC	3777	1.56e-67	4.1e-68	0.468493	0.122645	0.408862
Sulfonylureas	CPT1A	Endometrioid OC	3889	1.81e-256	4.75e-257	0.559051	0.147044	0.293905
DPP4i	DPP4	Endometrioid OC	2665	2.15e-49	6.62e-50	0.546643	0.167916	0.28544
Biguanides	ETFDH	Endometrioid OC	2781	5.01e-303	8.26e-304	0.433026	0.0713508	0.495623
AGI	GAA	Endometrioid OC	4241	7.94e-305	1.83e-305	0.58521	0.135143	0.279647
AGI	GANAB	Endometrioid OC	3055	1.91e-52	2.8e-53	0.221025	0.0323379	0.746638
Other drugs	GCK	Endometrioid OC	2991	9.11e-22	1.33e-22	0.571437	0.0833346	0.345228
GLP-1RA	GLP1R	Endometrioid OC	4587	8.38e-13	1.52e-12	0.30611	0.556785	0.137105
TZDs	GSTP1	Endometrioid OC	3855	1.3e-05	5.88e-06	0.294854	0.133522	0.571606
DPP4i	HMGCR	Endometrioid OC	3076	2.61e-44	5e-45	0.451933	0.0866462	0.461421
Insulin	IGF1R	Endometrioid OC	5473	2.79e-77	1.09e-77	0.362065	0.141385	0.496551
Insulin	IGFBP7	Endometrioid OC	5101	2.48e-134	8.7e-135	0.529822	0.185948	0.28423
Insulin	INSR	Endometrioid OC	5772	6.89e-13	2.09e-13	0.500459	0.151738	0.347803
DPP4i	ITGAL	Endometrioid OC	1480	9.16e-144	3.35e-144	0.203254	0.074211	0.722535
Sulfonylureas	KCNJ10	Endometrioid OC	3476	1.54e-68	3.64e-69	0.493138	0.116436	0.390427
Sulfonylureas	KCNJ11	Endometrioid OC	3058	6.78e-32	1.24e-32	0.475004	0.0865721	0.438424
AGI	MGAM	Endometrioid OC	3674	3.87e-196	7.68e-197	0.554701	0.110093	0.335206
TZDs	PPARA	Endometrioid OC	4768	2.09e-11	9.41e-12	0.562697	0.253499	0.183805
Sulfonylureas	PPARG	Endometrioid OC	4079	4e-215	1.11e-215	0.619919	0.171738	0.208343
Biguanides	PRKAA1	Endometrioid OC	3739	1.76e-19	8.33e-20	0.189538	0.089774	0.720688
Other drugs	RAMP1	Endometrioid OC	4897	4.84e-147	1.37e-147	0.63757	0.180867	0.181563
Other drugs	RAMP3	Endometrioid OC	3895	5.87e-217	1.23e-217	0.335221	0.0700511	0.594728
TZDs	SERPINE1	Endometrioid OC	4235	5.55e-15	1.25e-15	0.552323	0.124972	0.322706
Other drugs	SIGMAR1	Endometrioid OC	2977	1.26e-299	2.62e-300	0.426885	0.0886718	0.484444
TZDs	SLC29A1	Endometrioid OC	4030	1.08e-33	2.7e-34	0.531796	0.133342	0.334862
Biguanides	SLC47A1	Endometrioid OC	2519	9.11e-244	2.09e-244	0.511758	0.117195	0.371047
Sulfonylureas	TRPM4	Endometrioid OC	3982	2.32e-182	5.23e-183	0.623072	0.140085	0.236843
Sulfonylureas	VEGFA	Endometrioid OC	3489	9.18e-185	1.97e-185	0.425093	0.0914257	0.483481
Sulfonylureas	ABCA1	Mucinous OC	4928	1.79e-45	5.73e-46	0.590164	0.188799	0.221037
Other drugs	AKR1A1	Mucinous OC	2742	5.01e-28	7.51e-29	0.584299	0.0874958	0.328205
Other drugs	AKR1B1	Mucinous OC	4049	7.01e-241	2.33e-241	0.190859	0.063401	0.74574
Insulin	CCN3	Mucinous OC	3989	8.7e-82	2.37e-82	0.547142	0.149132	0.303726
Other drugs	CD3E	Mucinous OC	3778	1.84e-67	4.96e-68	0.550335	0.148388	0.301276
Sulfonylureas	CPT1A	Mucinous OC	3888	1.85e-256	4.71e-257	0.571784	0.14566	0.282557
DPP4i	DPP4	Mucinous OC	2668	2.2e-49	3e-50	0.558113	0.0762409	0.365647
Biguanides	ETFDH	Mucinous OC	2782	1.25e-303	1.62e-304	0.107865	0.0139277	0.878208
AGI	GAA	Mucinous OC	4241	6.73e-305	2.06e-305	0.496439	0.152139	0.351422
AGI	GANAB	Mucinous OC	3055	3.98e-52	1.68e-52	0.459962	0.194004	0.346034
Other drugs	GCK	Mucinous OC	2990	9.64e-22	1.67e-22	0.60454	0.104646	0.290814
GLP-1RA	GLP1R	Mucinous OC	4587	1.42e-12	6.69e-13	0.518817	0.244346	0.236837
TZDs	GSTP1	Mucinous OC	3855	2.68e-05	5.3e-06	0.609503	0.12044	0.270025
DPP4i	HMGCR	Mucinous OC	3076	1.27e-44	1.05e-44	0.220233	0.181894	0.597873
Insulin	IGF1R	Mucinous OC	5473	4.24e-77	1.63e-77	0.550856	0.211818	0.237326
Insulin	IGFBP7	Mucinous OC	5101	2.62e-134	6.33e-135	0.560118	0.135338	0.304544
Insulin	INSR	Mucinous OC	5771	7.71e-13	2.52e-13	0.559733	0.182634	0.257634
DPP4i	ITGAL	Mucinous OC	1480	1.4e-143	1.77e-144	0.309876	0.039349	0.650775
Sulfonylureas	KCNJ10	Mucinous OC	3474	1.89e-68	4.4e-69	0.605568	0.140832	0.2536
Sulfonylureas	KCNJ11	Mucinous OC	3058	7.71e-32	2.64e-32	0.540145	0.184661	0.275194
AGI	MGAM	Mucinous OC	3674	2.92e-196	5.86e-197	0.418337	0.0841102	0.497553
TZDs	PPARA	Mucinous OC	4767	2.11e-11	5.43e-12	0.568444	0.14636	0.285195
Sulfonylureas	PPARG	Mucinous OC	4078	4e-215	1.05e-215	0.620025	0.162061	0.217914
Biguanides	PRKAA1	Mucinous OC	3739	5.39e-19	9.87e-20	0.580916	0.106407	0.312677
Other drugs	RAMP1	Mucinous OC	4897	3.74e-147	9.58e-148	0.492498	0.126078	0.381424
Other drugs	RAMP3	Mucinous OC	3895	6.13e-217	2.24e-217	0.349761	0.128007	0.522232
TZDs	SERPINE1	Mucinous OC	4235	5.06e-15	2.21e-15	0.503845	0.220287	0.275868
Other drugs	SIGMAR1	Mucinous OC	2977	1.06e-299	1.93e-300	0.357999	0.0651522	0.576849
TZDs	SLC29A1	Mucinous OC	4030	1.16e-33	2.66e-34	0.571893	0.131648	0.296459
Biguanides	SLC47A1	Mucinous OC	2519	1e-243	1.59e-244	0.564422	0.08942	0.346158
Sulfonylureas	TRPM4	Mucinous OC	3983	2.19e-182	6.86e-183	0.587875	0.183897	0.228228
Sulfonylureas	VEGFA	Mucinous OC	3489	1.22e-184	2.6e-185	0.565936	0.120582	0.313482
Sulfonylureas	ABCA1	All OC (Histology Unadjusted)	4924	9.56e-234	3.03e-45	3.15e-189	1	3.92e-45
Other drugs	AKR1A1	All OC (Histology Unadjusted)	2735	7.22e-28	3.55e-29	0.841453	0.0414373	0.11711
Other drugs	AKR1B1	All OC (Histology Unadjusted)	4045	3.11e-240	2.74e-241	0.846348	0.0746815	0.0789706
Insulin	CCN3	All OC (Histology Unadjusted)	3990	5.33e-82	4.23e-83	0.335233	0.0265499	0.638217
Other drugs	CD3E	All OC (Histology Unadjusted)	3778	2.76e-67	2.93e-68	0.826195	0.0878111	0.085994
Sulfonylureas	CPT1A	All OC (Histology Unadjusted)	3883	2.6e-256	2.39e-257	0.80402	0.0739934	0.121986
DPP4i	DPP4	All OC (Histology Unadjusted)	2663	3.05e-49	1.53e-50	0.773193	0.0387586	0.188048
Biguanides	ETFDH	All OC (Histology Unadjusted)	2769	8.5e-303	1.75e-303	0.734061	0.150817	0.115122
AGI	GAA	All OC (Histology Unadjusted)	4241	1.03e-304	1.08e-305	0.757485	0.0795315	0.162984
AGI	GANAB	All OC (Histology Unadjusted)	3054	6.77e-52	3.76e-53	0.782715	0.0434753	0.173809
Other drugs	GCK	All OC (Histology Unadjusted)	2990	1.35e-21	7.56e-23	0.847662	0.0474227	0.104916
GLP-1RA	GLP1R	All OC (Histology Unadjusted)	4585	2.04e-12	2.09e-13	0.743434	0.0762907	0.180275
TZDs	GSTP1	All OC (Histology Unadjusted)	3834	3.58e-05	2.99e-06	0.81421	0.0679829	0.117768
DPP4i	HMGCR	All OC (Histology Unadjusted)	3077	4.87e-44	2.48e-45	0.844478	0.0428964	0.112625
Insulin	IGF1R	All OC (Histology Unadjusted)	5470	9.89e-266	7.7e-77	1.28e-189	1	5.32e-77
Insulin	IGFBP7	All OC (Histology Unadjusted)	5095	3.93e-134	4.6e-135	0.839285	0.0984097	0.0623058
Insulin	INSR	All OC (Histology Unadjusted)	5768	1.01e-12	1.53e-13	0.736168	0.110717	0.153114
DPP4i	ITGAL	All OC (Histology Unadjusted)	1473	1.98e-143	8.43e-145	0.44006	0.0186856	0.541254
Sulfonylureas	KCNJ10	All OC (Histology Unadjusted)	3475	2.11e-68	6.71e-69	0.675535	0.214994	0.109471
Sulfonylureas	KCNJ11	All OC (Histology Unadjusted)	3057	1.19e-31	8.66e-33	0.83532	0.0606107	0.104069
AGI	MGAM	All OC (Histology Unadjusted)	3672	0	6.97e-196	9.84e-190	1	1.02e-190
TZDs	PPARA	All OC (Histology Unadjusted)	4769	3.09e-11	3.02e-12	0.833159	0.0814505	0.0853908
Sulfonylureas	PPARG	All OC (Histology Unadjusted)	4074	5.13e-215	5.33e-216	0.795305	0.0826264	0.122068
Biguanides	PRKAA1	All OC (Histology Unadjusted)	3737	1.77e-19	7.24e-19	0.190741	0.780005	0.0292543
Other drugs	RAMP1	All OC (Histology Unadjusted)	4895	2.1e-295	7.59e-147	2.76e-149	1	1.57e-144
Other drugs	RAMP3	All OC (Histology Unadjusted)	3896	1.44e-216	1.09e-217	0.822803	0.062157	0.11504
TZDs	SERPINE1	All OC (Histology Unadjusted)	4231	7.3e-206	1e-14	7.28e-192	1	7.74e-15
Other drugs	SIGMAR1	All OC (Histology Unadjusted)	2968	1.59e-300	9.75e-302	0.0537801	0.00326834	0.942952
TZDs	SLC29A1	All OC (Histology Unadjusted)	4030	1.52e-33	3.16e-34	0.751115	0.156334	0.0925511
Biguanides	SLC47A1	All OC (Histology Unadjusted)	2509	1.4e-243	6.24e-245	0.788653	0.035071	0.176276
Sulfonylureas	TRPM4	All OC (Histology Unadjusted)	3979	3.19e-182	2.24e-183	0.854372	0.0601422	0.0854855
Sulfonylureas	VEGFA	All OC (Histology Unadjusted)	3486	0	2.16e-184	2.39e-190	1	1.34e-184
Sulfonylureas	ABCA1	HGSOC (Survival)	4923	2.42e-45	3.05e-46	0.797186	0.100586	0.102228
Other drugs	AKR1A1	HGSOC (Survival)	2732	6.78e-28	3.9e-29	0.789802	0.0454701	0.164728
Other drugs	AKR1B1	HGSOC (Survival)	4044	2.99e-240	2.3e-241	0.814883	0.0625372	0.12258
Insulin	CCN3	HGSOC (Survival)	3987	1.18e-81	8.69e-83	0.744912	0.0546545	0.200433
Other drugs	CD3E	HGSOC (Survival)	3776	2.73e-67	2.62e-68	0.816411	0.0783552	0.105234
Sulfonylureas	CPT1A	HGSOC (Survival)	3879	2.52e-256	2.92e-257	0.779256	0.0904025	0.130341
DPP4i	DPP4	HGSOC (Survival)	2664	7.91e-50	6.05e-51	0.200779	0.0153291	0.783892
Biguanides	ETFDH	HGSOC (Survival)	2774	8.76e-303	5.04e-304	0.75653	0.0435594	0.199911
AGI	GAA	HGSOC (Survival)	4238	9.27e-305	1.18e-305	0.683701	0.0867311	0.229568
AGI	GANAB	HGSOC (Survival)	3052	6.13e-52	7.31e-53	0.707859	0.0844642	0.207677
Other drugs	GCK	HGSOC (Survival)	2989	1.3e-21	1.09e-22	0.81823	0.0681293	0.11364
GLP-1RA	GLP1R	HGSOC (Survival)	4580	2.25e-12	1.92e-13	0.822498	0.0702375	0.107265
TZDs	GSTP1	HGSOC (Survival)	3825	3.56e-05	3.64e-06	0.808047	0.0827999	0.109114
DPP4i	HMGCR	HGSOC (Survival)	3075	4.76e-44	2.51e-45	0.824475	0.0434856	0.132039
Insulin	IGF1R	HGSOC (Survival)	5465	6.39e-77	7.01e-78	0.829286	0.0910986	0.0796149
Insulin	IGFBP7	HGSOC (Survival)	5095	3.8e-134	4.82e-135	0.813129	0.102981	0.0838896
Insulin	INSR	HGSOC (Survival)	5765	5.11e-13	9.27e-14	0.370813	0.0672736	0.561914
DPP4i	ITGAL	HGSOC (Survival)	1470	2.69e-143	1.9e-144	0.597569	0.0421871	0.360244
Sulfonylureas	KCNJ10	HGSOC (Survival)	3471	1.22e-68	1.69e-68	0.392116	0.540278	0.0676059
Sulfonylureas	KCNJ11	HGSOC (Survival)	3057	1.17e-31	8.45e-33	0.822325	0.0591509	0.118524
AGI	MGAM	HGSOC (Survival)	3672	5.65e-196	4.63e-197	0.810134	0.0664774	0.123389
TZDs	PPARA	HGSOC (Survival)	4765	1.91e-11	3.46e-12	0.514777	0.0932446	0.391979
Sulfonylureas	PPARG	HGSOC (Survival)	4074	5.09e-215	4.91e-216	0.789591	0.0760462	0.134363
Biguanides	PRKAA1	HGSOC (Survival)	3736	7.55e-19	7.92e-20	0.813816	0.0853932	0.100791
Other drugs	RAMP1	HGSOC (Survival)	4890	6.03e-147	7.22e-148	0.793676	0.0950518	0.111272
Other drugs	RAMP3	HGSOC (Survival)	3895	1.44e-216	1.23e-217	0.820978	0.0700566	0.108966
TZDs	SERPINE1	HGSOC (Survival)	4230	7.08e-15	2.1e-15	0.705264	0.208994	0.0857418
Other drugs	SIGMAR1	HGSOC (Survival)	2968	9.85e-300	6.27e-301	0.333095	0.0211987	0.645706
TZDs	SLC29A1	HGSOC (Survival)	4026	1.53e-33	2.77e-34	0.75734	0.13672	0.10594
Biguanides	SLC47A1	HGSOC (Survival)	2513	1.2e-243	6.14e-245	0.672271	0.0344933	0.293236
Sulfonylureas	TRPM4	HGSOC (Survival)	3980	3.13e-182	2.45e-183	0.839624	0.0655689	0.0948071
Sulfonylureas	VEGFA	HGSOC (Survival)	3482	1.77e-184	1.72e-185	0.818047	0.0796581	0.102295
Sulfonylureas	ABCA1	All OC (Histology Adjusted)	4924	2.54e-45	2.39e-46	0.836627	0.0789117	0.0844613
Other drugs	AKR1A1	All OC (Histology Adjusted)	2735	7.23e-28	3.73e-29	0.842776	0.0434274	0.113796
Other drugs	AKR1B1	All OC (Histology Adjusted)	4045	3.13e-240	2.46e-241	0.853313	0.0669298	0.0797576
Insulin	CCN3	All OC (Histology Adjusted)	3990	8.08e-82	5.79e-83	0.507913	0.0364046	0.455682
Other drugs	CD3E	All OC (Histology Adjusted)	3778	2.65e-67	3.92e-68	0.792553	0.117355	0.0900923
Sulfonylureas	CPT1A	All OC (Histology Adjusted)	3883	2.53e-256	2.15e-257	0.783562	0.0665873	0.149851
DPP4i	DPP4	All OC (Histology Adjusted)	2663	2.93e-49	1.34e-50	0.743287	0.033922	0.222791
Biguanides	ETFDH	All OC (Histology Adjusted)	2770	9.23e-303	4.59e-304	0.79724	0.0396225	0.163138
AGI	GAA	All OC (Histology Adjusted)	4241	9.93e-305	1.12e-305	0.73176	0.0825909	0.185649
AGI	GANAB	All OC (Histology Adjusted)	3054	6.2e-52	3.44e-53	0.716583	0.039691	0.243726
Other drugs	GCK	All OC (Histology Adjusted)	2990	1.33e-21	7.84e-23	0.836733	0.0491978	0.114069
GLP-1RA	GLP1R	All OC (Histology Adjusted)	4585	2.2e-12	2.08e-13	0.804583	0.0758308	0.119586
TZDs	GSTP1	All OC (Histology Adjusted)	3834	3.62e-05	3.35e-06	0.82335	0.0762097	0.100401
DPP4i	HMGCR	All OC (Histology Adjusted)	3077	4.79e-44	2.51e-45	0.830349	0.043417	0.126234
Insulin	IGF1R	All OC (Histology Adjusted)	5470	6.45e-77	7.04e-78	0.83825	0.0913993	0.0703512
Insulin	IGFBP7	All OC (Histology Adjusted)	5095	3.89e-134	4.79e-135	0.831186	0.1024	0.0664131
Insulin	INSR	All OC (Histology Adjusted)	5768	9.61e-13	1.62e-13	0.697844	0.117258	0.184897
DPP4i	ITGAL	All OC (Histology Adjusted)	1473	1.8e-143	7.43e-145	0.398318	0.0164655	0.585217
Sulfonylureas	KCNJ10	All OC (Histology Adjusted)	3475	1.39e-68	1.44e-68	0.444368	0.462653	0.0929799
Sulfonylureas	KCNJ11	All OC (Histology Adjusted)	3057	1.21e-31	6.74e-33	0.847999	0.0471788	0.104822
AGI	MGAM	All OC (Histology Adjusted)	3672	5.89e-196	3.98e-197	0.845339	0.0571434	0.0975178
TZDs	PPARA	All OC (Histology Adjusted)	4769	2.92e-11	3.35e-12	0.786679	0.0901335	0.123188
Sulfonylureas	PPARG	All OC (Histology Adjusted)	4075	5.1e-215	4.6e-216	0.791336	0.0712562	0.137408
Biguanides	PRKAA1	All OC (Histology Adjusted)	3737	3.72e-19	5.11e-19	0.401255	0.55043	0.0483158
Other drugs	RAMP1	All OC (Histology Adjusted)	4895	6.26e-147	8.64e-148	0.823911	0.113824	0.0622649
Other drugs	RAMP3	All OC (Histology Adjusted)	3896	1.45e-216	1.14e-217	0.830117	0.0652233	0.10466
TZDs	SERPINE1	All OC (Histology Adjusted)	4231	6.95e-15	2.29e-15	0.692036	0.227717	0.0802468
Other drugs	SIGMAR1	All OC (Histology Adjusted)	2968	4.1e-300	2.19e-301	0.138818	0.00739355	0.853788
TZDs	SLC29A1	All OC (Histology Adjusted)	4030	1.52e-33	3.07e-34	0.750983	0.151977	0.0970396
Biguanides	SLC47A1	All OC (Histology Adjusted)	2509	1.41e-243	6.42e-245	0.790424	0.0360412	0.173535
Sulfonylureas	TRPM4	All OC (Histology Adjusted)	3979	3.18e-182	2.09e-183	0.851006	0.0560804	0.0929132
Sulfonylureas	VEGFA	All OC (Histology Adjusted)	3486	1.78e-184	1.86e-185	0.823427	0.0862973	0.090276
This table illustrates the results from a colocalization analysis, which investigates whether the associations between specific gene expressions and osteoarthritis were attributable to the same causal genetic variant. It presents several probabilities: PP.H0.abf which suggests no association between the gene expression and the trait. PP.H1.abf indicating that there is an association with the gene…
